# Supplementary material for: Proteomic and Transcriptomic Patterns during Lipid Remodeling in Nannochloropsis gaditana
Source: MDPI journal article supplement (doi:10.3390/ijms21186946), 2020-09-22
Supplement: s1 [file s1]

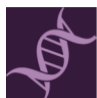

*Supplementary data*

## Proteomic and transcriptomic patterns during lipid remodeling in *Nannochloropsis gaditana*

Chris J. Hulatt <sup>1,\*</sup>, Irina Smolina <sup>1</sup>, Adam Dowle <sup>2</sup>, Martina Kopp <sup>1</sup>, Ghana K. Vasanth <sup>1</sup>, Galice Hoarau <sup>1</sup>, René H. Wijffels <sup>3</sup> and Viswanath Kiron <sup>1</sup>

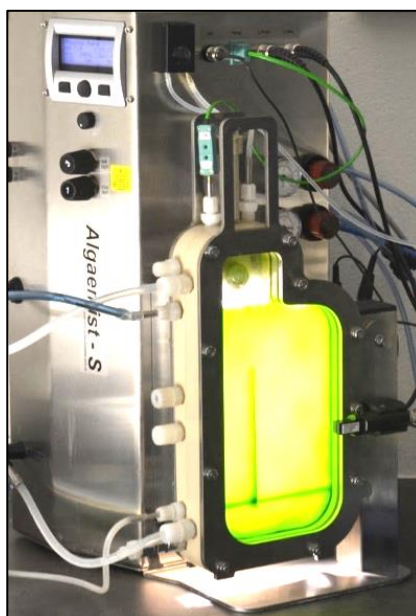

## Proteomic analysis

**Supplementary Table 1.** The cultivation sequence of samples/treatments in the two photobioreactors was designed to prevent bias across individual photobioreactor units or time periods. “Batch” refers to the order in which cultivations were conducted. Two photobioreactors “photobioreactor ID” were run simultaneously and each “treatment” was assigned as indicated.

| Batch | photobioreactor ID | treatment  |
|-------|--------------------|------------|
| 1     | A                  | Control    |
| 1     | B                  | Nitrogen   |
| 2     | A                  | Phosphorus |
| 2     | B                  | Control    |
| 3     | A                  | Nitrogen   |
| 3     | B                  | Phosphorus |
| 4     | A                  | Control    |
| 4     | B                  | Nitrogen   |
| 5     | A                  | Phosphorus |
| 5     | B                  | Control    |
| 6     | A                  | Nitrogen   |
| 6     | B                  | Phosphorus |

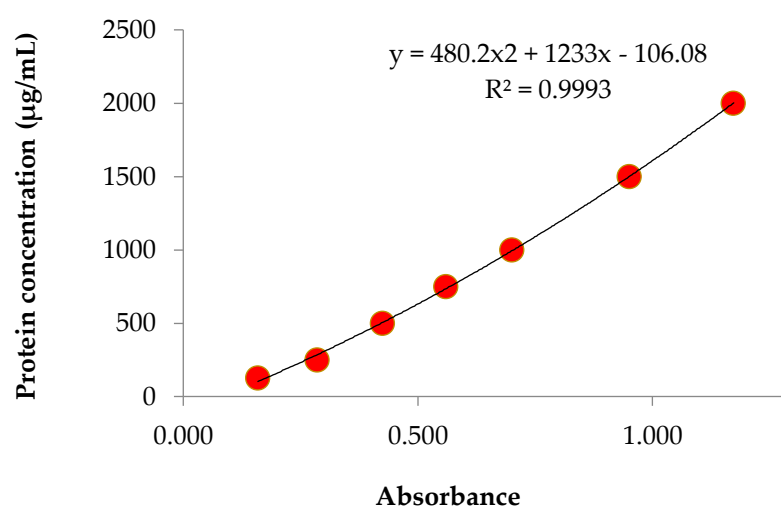

**Supplementary Figure 1.** Calibration plot from the BCA assay used for quantitation and normalization of protein extracted from each sample. A standardized 95.1 µg of protein from each sample was used for TMT LC-MS/MS analysis.

**Supplementary Table 2.** Peptides were labelled with TMT 10-plex reagents (Thermo Scientific) as detailed in the manufacturer's protocol. The labels were paired with the samples as below, where Sample represents the protein sample id (P1 to P10) and the label is the specific index provided by the manufacturer.

| Sample | Treatment  | Label |
|--------|------------|-------|
| P1     | Control    | 127N  |
| P2     | Nitrogen   | 128N  |
| P3     | Control    | 127C  |
| P4     | Nitrogen   | 128C  |
| P5     | Control    | 129N  |
| P6     | Nitrogen   | 130N  |
| P7     | Control    | 129C  |
| P8     | Nitrogen   | 130C  |
| P9     | Phosphorus | 126   |
| P10    | Phosphorus | 131   |

## 1.2 Transcriptome sequencing

A number of genome assemblies are available for different strains of *Nannochloropsis*. In order to obtain the best results from our transcriptomic data, we first confirmed the strain we used in the experiments using the mitogenome and 18S ribosomal genes and then identified two genome sequences that could potentially be used for gene expression analysis. We compared the results of transcript alignment between the two genome assemblies to determine the best option for our data.

### 1.2.1 Genetic confirmation of the experimental strain.

We confirmed the identity of the experimental strain using two approaches. First, reads from several libraries were aligned to mitochondrial genome sequences of *N. gaditana* B31 and CCMP526 strains using Bowtie2. The alignment to each mitochondrial genome was visualized using Integrative Genomics Viewer. Across more than 30 kb of mitochondrial genome, alignments to the CCMP526 genome showed no SNPs, while alignments to B31 genome showed 20 SNPs with alternative alleles being identical to the CCMP526 strain. The second approach included alignment of nuclear 18S ribosomal RNA from the experimental strain and from *N. gaditana* reference genomes B31 and CCMP526, as well as 4 other *Nannochloropsis* species: *N. salina* (accession numbers are AF045048.1 and AF045050.1), *N. granulata* (U41092.1, AF045041.1 and AF045042.1), *N. oceanica* (JF489982.1), and *N. oculata* (AF045044.1 and AF045045.1). Sequences were aligned using the ClustalW algorithm with default parameters in Geneious (Bio Matters). Multiple sequence alignment was used to build a Neighbour-Joining tree using Tamura-Nei distance model as implemented in Geneious. Both approaches confirmed that the strain used in this study is *N. gaditana* CCMP526, and that both *N. gaditana* B31 and CCMP526 are very similar amongst strains of *Nannochloropsis* (Supplementary Figure 2).

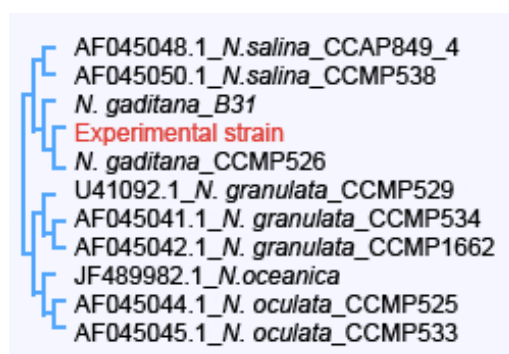

**Supplementary Figure 2.** Multiple sequence alignment of 18S sequences amongst ten strains of *Nannochloropsis*, including the experimental strain (red) that was cultivated in our photobioreactors.

### 1.2.2 Transcript read mapping

Due to the similarity between the CCMP526 and B31 strains, we decided to map reads to both genome assemblies and compare the results. We found that the more recent B31 genome (2014) provided measurably higher transcript mapping statistics (Supplementary Table 3) than the original CCMP526 assembly (2011). Taking into account the genetic similarity, the read mapping statistics and the protein databases, we chose to use the B31 mapping results in the manuscript.

**Supplementary Table 3.** Comparison of our sequenced libraries mapped to the genomes of strains CCMP526 (assembly ASM24072v1) and B31 (assembly NagaB31\_1.0). The library index corresponds to the treatment (C= control, N= nitrogen, P= phosphorus), the time (3 or 5 days) and the replicate culture (A,B,C,D), e.g. the first entry “C\_3\_A” is a control sample from day 3, replicate A.

| Library index | Raw reads | B31 assembly          |                         | CCMP526 assembly      |                         |
|---------------|-----------|-----------------------|-------------------------|-----------------------|-------------------------|
|               |           | Uniquely mapped reads | % uniquely mapped reads | Uniquely mapped reads | % uniquely mapped reads |
| C_3_A         | 22370337  | 18872400              | 84.8                    | 15794981              | 71.0                    |
| C_3_B         | 18628638  | 16298460              | 88.0                    | 13504147              | 72.9                    |
| C_3_C         | 19498430  | 17011555              | 87.8                    | 14034465              | 72.4                    |
| C_3_D         | 4387222   | 3850742               | 88.2                    | 3193371               | 73.1                    |
| C_5_A         | 17695722  | 14462685              | 82.3                    | 12108169              | 68.9                    |
| C_5_B         | 18716317  | 16469217              | 88.5                    | 13642309              | 73.3                    |
| C_5_C         | 19314569  | 16945821              | 88.2                    | 14007109              | 72.9                    |
| C_5_D         | 15871684  | 13705824              | 86.8                    | 11504378              | 72.9                    |
| N_3_A         | 19490270  | 16425553              | 84.8                    | 13614231              | 70.3                    |
| N_3_B         | 19142078  | 16917222              | 88.9                    | 14002819              | 73.6                    |
| N_3_C         | 18703611  | 16372489              | 88.0                    | 13437923              | 72.2                    |
| N_3_D         | 17877643  | 15841284              | 89.1                    | 12993388              | 73.1                    |
| N_5_A         | 18765398  | 14850840              | 79.7                    | 12024143              | 64.5                    |
| N_5_B         | 17494433  | 15487549              | 89.0                    | 12846836              | 73.8                    |
| N_5_C         | 26281440  | 22834429              | 87.4                    | 18711245              | 71.6                    |
| N_5_D         | 18269440  | 16150479              | 88.9                    | 13148045              | 72.3                    |
| P_3_A         | 18513837  | 16014709              | 86.9                    | 13627442              | 74.0                    |
| P_3_B         | 18850927  | 16489667              | 87.9                    | 13746148              | 73.3                    |
| P_3_C         | 18746741  | 16368332              | 87.8                    | 13623486              | 73.1                    |
| P_3_D         | 19954394  | 17423274              | 87.8                    | 14512272              | 73.1                    |
| P_5_A         | 17934875  | 15415194              | 86.4                    | 12959870              | 72.6                    |
| P_5_B         | 18120731  | 15603526              | 86.6                    | 13211108              | 73.3                    |
| P_5_C         | 20407306  | 17533555              | 86.4                    | 14565102              | 71.8                    |
| P_5_D         | 17745886  | 15207838              | 86.2                    | 12631985              | 71.6                    |
| Average       | 18449247  | 15939693              | 86.9                    | 13226873              | 72.2                    |

### 1.3 Principal component analysis (PCA)

Principal component analysis was used to initially visualize the clustering amongst experimental treatments in the protein and transcript datasets. Supplementary Figure 3a represents the clustering amongst the 10 protein samples from day 3, indicating distinct clustering of N- samples but weaker demarcation between C and P- treatments. Supplementary Figure 3b shows a similar pattern for the transcript data at day 3, whilst at day 5 (Supp. Fig. 3c) the pattern in the transcript data strengthens and each of the three treatments cluster separately.

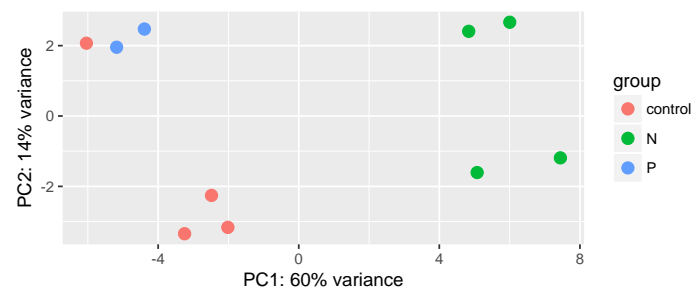

(a)

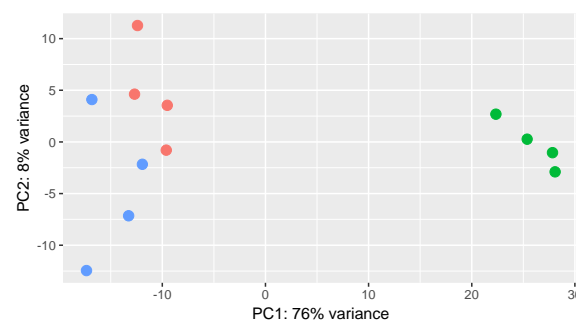

(b)

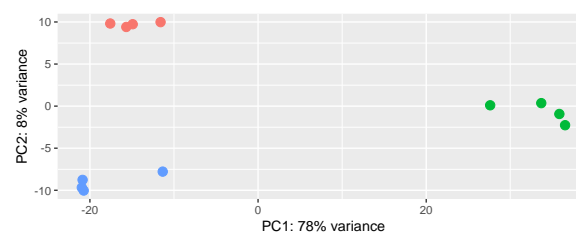

(c)

**Supplementary Figure 3.** Clustering of experimental samples from control, nitrogen starved and phosphorus starved treatments represented by principal component analysis (PCA). (a) Protein samples from day 3 ( $n = 10$ ). (b) Transcript samples from day 3 ( $n = 12$ ) and (c) Transcript samples from day 5 ( $n = 12$ ).

## 1.4 Protein-transcript correlations

In the manuscript we present three different approaches for characterizing the relationship between transcript and protein expression from the same biological samples. The following provides extra details for the analysis shown in manuscript Figure 3.

### 1.4.1 Association of proteins and transcripts

We associated proteins and their transcripts together using their unique accession numbers. Although in total 3,423 proteins were identified in the proteomics analysis, some of these were CCMP526 accessions and so did not have matching transcripts. The data in the correlation analysis are therefore all based on the protein and transcript accessions from the B31 genome assembly.

### 1.4.2 Linear mixed-effects model of RPKM vs Mol% (Manuscript Figure 3b)

Our TMT experiment was designed to identify differential expression across treatments by comparing the abundance of different reporter ions in a multiplexed sample. Whilst the TMT reporter ion intensity roughly scales with (and correlates with) protein abundance, it does not provide absolute quantitation of proteins. This is due to the nature of the labelling of peptides because, although the reporter ion intensity provides very accurate quantitation for the same peptide in different samples, the reporter ion intensity is only semi-quantitative across different types of peptides. To improve our analysis in Figure 3b, we therefore used the protein abundance in multiplexed samples (PAMUS) approach described in the manuscript. For transcript data, we used the mapped read counts per kilobase of exon, per million reads (RPKM).

To fit the regression line, a linear mixed-effects model was used to account for the data structure, where matching protein and transcript data from ten experimental cultures were available. The data were modelled using the R package *nlme*, fitting a random slope and random intercept for each of the ten samples. The model, following *nlme* notation, is shown in eq. 1, after Pinheiro & Bates (2006).

$$\text{lme}(\log\text{RPKM} \sim \log\text{Mol\%}, \text{random} = \sim 1 + \log\text{Mol\%} \mid \text{replicate}) \quad (1)$$

Where “logRPKM” is the natural logarithm of transcript counts in units RPKM and “logMol%” is the natural logarithm of protein abundance in Mol%. The “replicate” term is the individual turbidostat cultivation ( $n = 10$ ). The slopes and intercepts of the linear relation between log(RPKM) and log(Mol%) for each replicate cultivation are shown in Table S4. In addition, the  $R^2$  correlation coefficients for each are presented, where the mean  $R^2 = 0.31$ .

**Supplementary Table 4.** The slopes and intercepts of the linear relation between transcript log(RPKM) and protein log(Mol%) for each sample. The  $R^2$  and number of data points included is also presented.

| Replicate cultivation | Intercept | Slope | $R^2$ | n     |
|-----------------------|-----------|-------|-------|-------|
| C1                    | -7.78     | 0.645 | 0.34  | 2,540 |
| C2                    | -7.49     | 0.607 | 0.32  | 2,546 |
| C3                    | -7.90     | 0.661 | 0.34  | 2,540 |
| C4                    | -7.53     | 0.611 | 0.30  | 2,541 |
| N1                    | -7.71     | 0.624 | 0.27  | 2,526 |
| N2                    | -7.78     | 0.660 | 0.30  | 2,526 |
| N3                    | -8.10     | 0.691 | 0.30  | 2,513 |
| N4                    | -7.81     | 0.662 | 0.30  | 2,518 |
| P1                    | -7.69     | 0.621 | 0.29  | 2,568 |
| P2                    | -7.84     | 0.656 | 0.35  | 2,530 |

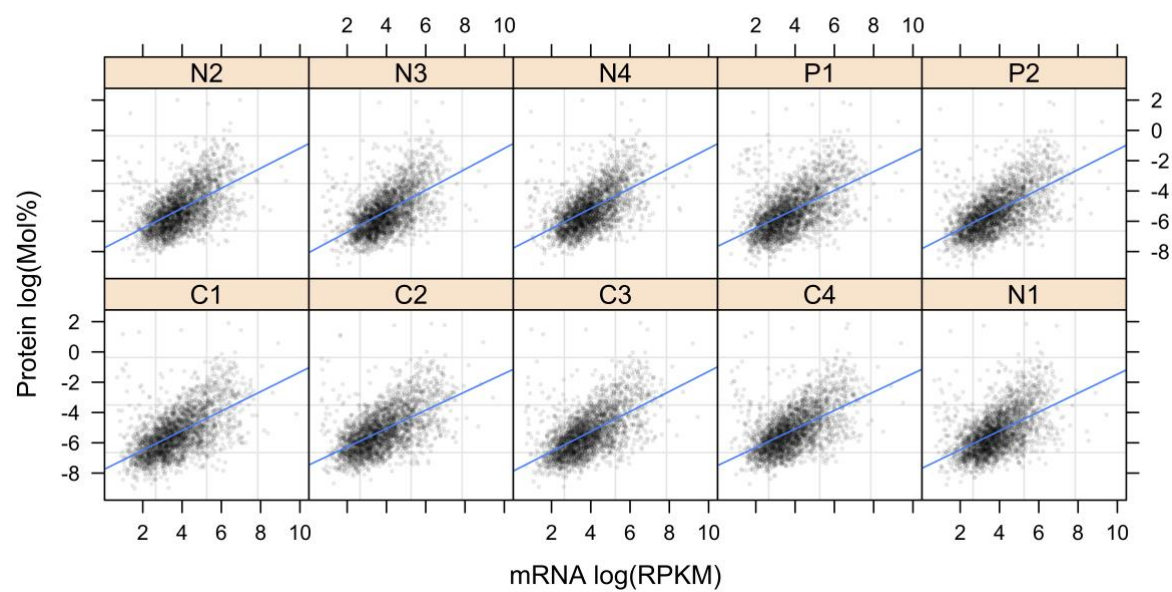

**Supplementary Figure 4.** Panel plot showing the correlation between protein abundance (logMol%) and transcript abundance (logRPKM) for each of the ten individual cultivations.



### 1.4.3 Linear models fitted to each protein/transcript accession (Manuscript Figures 3c and 3d)

Our third method captures the correlation between protein abundance and transcript abundance for each accession separately. The data describes the heterogeneity of correlations across the proteome. We again use  $\log(\text{RPKM})$  transcript counts as the measure of mRNA abundance, but since these are correlations within individual proteins/genes, we did not apply any emPAI adjustments. Instead, we simply used the normalized TMT reporter ion intensities and acknowledge that the absolute values of the slopes will vary between protein/transcript accessions, depending on individual peptide/protein response factors. In total, 2,576 simple linear models were fitted and  $R^2$  values were calculated. A small subset of these linear models are shown as examples in Supplementary Figure 5.

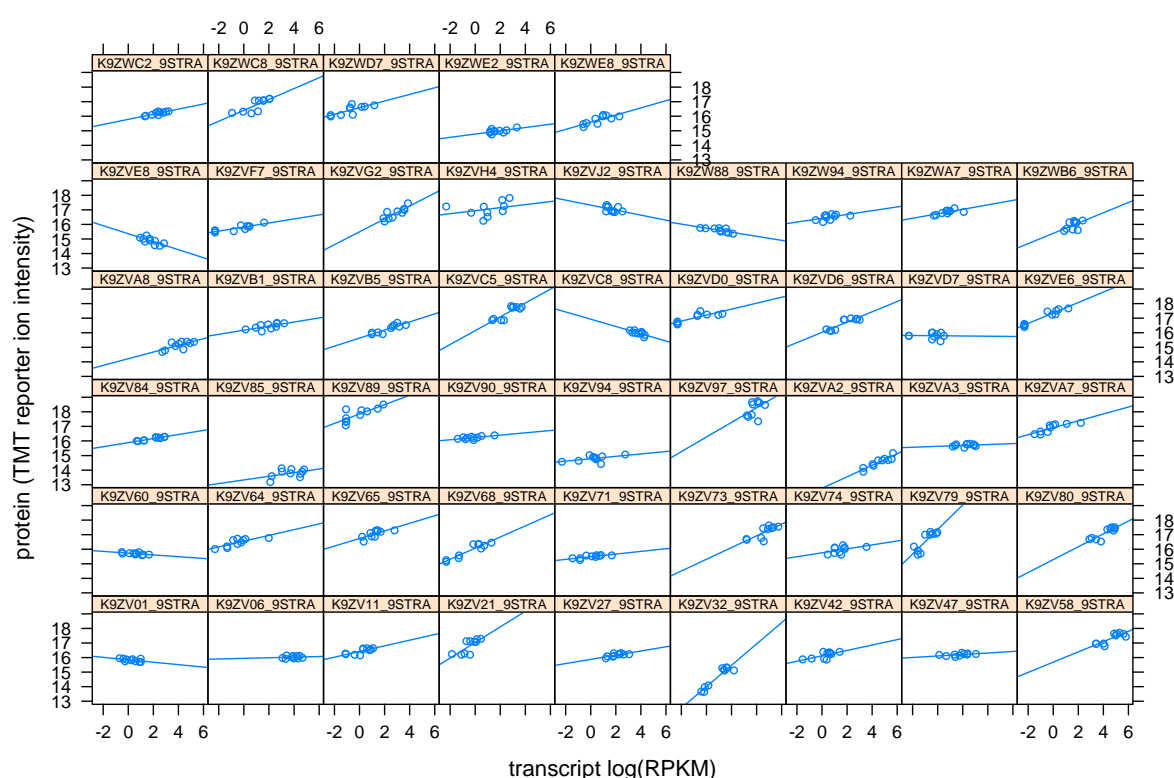

**Supplementary Figure 5.** A small subset of 50 linear regression models (out of 2,576) provided as an example of the method. Each panel represents one gene/protein. Since there were 10 TMT labels, there are a maximum of  $n=10$  data points in each correlation. On the x-axis is the  $\log(\text{RPKM})$  transcript counts, whilst the y-axis is the normalized TMT reporter ion intensity directly from the LC-MS/MS analysis. The data is summarized in the manuscript by the  $R^2$  values and the slope (Figure 3c, 3d).

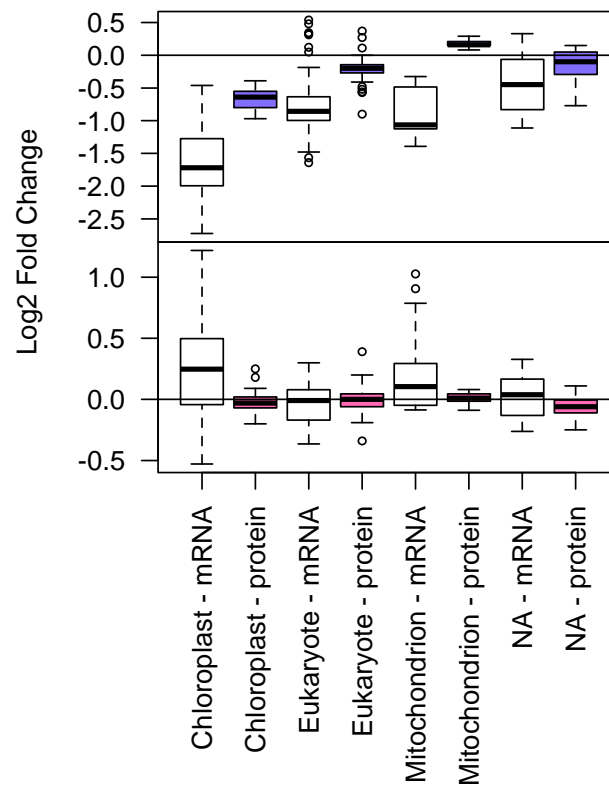

**Supplementary Figure 6.** Fold changes of ribosomal proteins and ribosomal mRNA transcripts in N- (upper panel) and P- (lower panel) treatments relative to controls, after 3 days of treatment. Ribosomal proteins and transcripts are grouped as follows; plastid (prokaryotic, including 30S & 50S), mitochondrion, eukaryote (including cytoplasm and endoplasmic reticulum, 40S & 60S) and NA (not annotated).

**Supplementary Table 5.** Differential expression of proteins annotated as amine oxidases in N-/Control and P-/Control treatments. Proteins determined significantly differently expressed at the Benjamini-Hochberg adjusted p-value thresholds are indicated with (\*\*), those significant at the 5% level are indicated (\*).

| Condition | Name                     | UniProt<br>Accession<br>Number | Molecular<br>Weight | No. quantified<br>spectra | L2fc  | p-value   |
|-----------|--------------------------|--------------------------------|---------------------|---------------------------|-------|-----------|
| N/Control | Amine oxidase            | W7U0L2_9STRA                   | 87 kDa              | 12                        | 0.03  | 0.28      |
| N/Control | Amine oxidase            | W7U1W2_9STRA                   | 64 kDa              | 15                        | 0.16  | 0.001**   |
| N/Control | Amine oxidase            | W7TFN3_9STRA                   | 75 kDa              | 18                        | 1.38  | 0.0001**  |
| N/Control | Amine oxidase            | W7TES8_9STRA                   | 63 kDa              | 6                         | 0.21  | 0.074     |
| N/Control | Amine oxidase            | K8YW47_NANGC                   | 90 kDa              | 10                        | 0.11  | 0.18      |
| N/Control | Amine oxidase            | I2CR86_NANGC                   | 20 kDa              | 6                         | 0.27  | 0.00027** |
| N/Control | Amine oxidase (fragment) | I2CPM9_NANGC                   | 31 kDa              | 7                         | 0.16  | 0.13      |
| P/Control | Amine oxidase            | W7U0L2_9STRA                   | 87 kDa              | 12                        | 0.07  | 0.11      |
| P/Control | Amine oxidase            | W7U1W2_9STRA                   | 64 kDa              | 15                        | 0.05  | 0.55      |
| P/Control | Amine oxidase            | W7TFN3_9STRA                   | 75 kDa              | 18                        | -0.32 | 0.0001**  |
| P/Control | Amine oxidase            | W7TES8_9STRA                   | 63 kDa              | 6                         | -0.27 | 0.019*    |
| P/Control | Amine oxidase            | K8YW47_NANGC                   | 90 kDa              | 10                        | 0.01  | 0.72      |
| P/Control | Amine oxidase            | I2CR86_NANGC                   | 20 kDa              | 6                         | -0.01 | 0.89      |
| P/Control | Amine oxidase (fragment) | I2CPM9_NANGC                   | 31 kDa              | 7                         | 0.09  | 0.16      |

**Supplementary Table 6.** Differential expression of proteins annotated as desaturases in N-/Control and P-/Control treatments. Proteins determined significantly differently expressed at the Benjamini-Hochberg adjusted p-value thresholds are indicated with (\*\*), those significant at the 5% level are indicated (\*).

| Condition | Name                                                     | UniProt<br>Accession<br>Number | Molecular<br>Weight | No.<br>quantified<br>spectra | L2fc  | p-value  |
|-----------|----------------------------------------------------------|--------------------------------|---------------------|------------------------------|-------|----------|
| N/Control | Delta 5 fatty acid desaturase                            | K8YSX2_NANGC                   | 54 kDa              | 5                            | -0.95 | 0.0001** |
| N/Control | Fatty acid desaturase type 2                             | W7UCJ8_9STRA                   | 38 kDa              | 32                           | 0.09  | 0.016**  |
| N/Control | Glycerolipid omega-3 fatty acid desaturase<br>(Fragment) | I2CR09_NANGC                   | 51 kDa              | 3                            | -0.53 | 0.001**  |
| N/Control | Omega-6 fatty acid desaturase delta-12                   | K8YR13_NANGC                   | 51 kDa              | 3                            | -0.37 | 0.005**  |
| N/Control | Phytoene desaturase                                      | W7TCB4_9STRA                   | 66 kDa              | 39                           | -0.16 | 0.001**  |
| N/Control | Stearoyl-desaturase 5                                    | W7TAD9_9STRA                   | 39 kDa              | 7                            | -0.19 | 0.006**  |
| N/Control | Zeta-carotene desaturase                                 | W7UB54_9STRA                   | 67 kDa              | 32                           | -0.33 | 0.0001** |
| P/Control | Delta 5 fatty acid desaturase                            | K8YSX2_NANGC                   | 54 kDa              | 5                            | 0.03  | 0.75     |
| P/Control | Fatty acid desaturase type 2                             | W7UCJ8_9STRA                   | 38 kDa              | 32                           | -0.01 | 0.59     |
| P/Control | Glycerolipid omega-3 fatty acid desaturase<br>(Fragment) | I2CR09_NANGC                   | 51 kDa              | 3                            | 0.18  | 0.13     |
| P/Control | Omega-6 fatty acid desaturase delta-12                   | K8YR13_NANGC                   | 51 kDa              | 3                            | -0.04 | 0.82     |
| P/Control | Phytoene desaturase                                      | W7TCB4_9STRA                   | 66 kDa              | 39                           | -0.01 | 0.34     |
| P/Control | Stearoyl-desaturase 5                                    | W7TAD9_9STRA                   | 39 kDa              | 7                            | 0.05  | 0.74     |
| P/Control | Zeta-carotene desaturase                                 | W7UB54_9STRA                   | 67 kDa              | 32                           | -0.04 | 0.13     |

**Supplementary Table 7.** Fold changes and adjusted p-values of diacylglycerol acyltransferase transcripts, as determined by *DESeq2* analysis of RNA-seq data. The corresponding Protein ID is shown for cross-referencing to the proteome data.

|           | gene ID        | Protein ID   | Gene name                                     | Lzfc   | p-adj    |
|-----------|----------------|--------------|-----------------------------------------------|--------|----------|
| N/Control | Naga_100006g86 | W7U9S5_9STRA | Diacylglycerol acyltransferase family protein | 1.000  | 1.32E-22 |
| N/Control | Naga_100010g4  | W7U2S6_9STRA | Diacylglycerol acyltransferase family protein | 0.104  | 0.671    |
| N/Control | Naga_100028g44 | W7TT81_9STRA | Diacylglycerol acyltransferase family protein | -0.400 | 0.002    |
| N/Control | Naga_100030g42 | W7TTN1_9STRA | Diacylglycerol o-acyltransferase 2            | -1.145 | 8.41E-16 |
| N/Control | Naga_100071g18 | W7TPK1_9STRA | Diacylglycerol o-acyltransferase 2            | 0.394  | 0.002    |
| N/Control | Naga_100343g3  | W7T9Y9_9STRA | Diacylglycerol acyltransferase type 2         | 0.965  | 1.12E-09 |
| N/Control | Naga_100682g2  | W7T2V9_9STRA | Diacylglycerol acyltransferase                | -0.163 | 0.337    |
| N/Control | Naga_101968g1  | W7TT63_9STRA | Diacylglycerol acyltransferase                | -0.149 | 0.405    |
| P/Control | Naga_100006g86 | W7U9S5_9STRA | Diacylglycerol acyltransferase family protein | -0.122 | 0.645    |
| P/Control | Naga_100010g4  | W7U2S6_9STRA | Diacylglycerol acyltransferase family protein | -0.062 | 0.922    |
| P/Control | Naga_100028g44 | W7TT81_9STRA | Diacylglycerol acyltransferase family protein | -0.121 | 0.712    |
| P/Control | Naga_100030g42 | W7TTN1_9STRA | Diacylglycerol o-acyltransferase 2            | 0.104  | 0.789    |
| P/Control | Naga_100071g18 | W7TPK1_9STRA | Diacylglycerol o-acyltransferase 2            | -0.006 | 0.989    |
| P/Control | Naga_100343g3  | W7T9Y9_9STRA | Diacylglycerol acyltransferase type 2         | 0.211  | 0.574    |
| P/Control | Naga_100682g2  | W7T2V9_9STRA | Diacylglycerol acyltransferase                | 0.150  | 0.697    |
| P/Control | Naga_101968g1  | W7TT63_9STRA | Diacylglycerol acyltransferase                | -0.294 | 0.406    |

**Supplementary Table 8.** Differential expression of proteins annotated as lipases in N-/Control and P-/Control treatments. Proteins determined significantly differently expressed at the Benjamini-Hochberg adjusted p-value thresholds are indicated with (\*\*), those significant at the 5% level are indicated (\*).

| Condition | Name                                        | UniProt Accession Number | Molecular Weight | No. quantified spectra | L2fc  | p-value   |
|-----------|---------------------------------------------|--------------------------|------------------|------------------------|-------|-----------|
| N/Control | Calcium-independent phospholipase a2-gamma  | K8Z805_NANGC             | 111 kDa          | 2                      | 0.02  | 0.42      |
| N/Control | Cluster of Putative lipase (Fragment)       | W7TJ50_9STRA             | 49 kDa           | 1                      | -0.11 | 0.56      |
| N/Control | Esterase lipase thioesterase family protein | K8Z5U7_NANGC             | 45 kDa           | 7                      | -0.08 | 0.18      |
| N/Control | Gdsl lipase acylhydrolase family protein    | K8YWS8_NANGC             | 38 kDa           | 4                      | 0.4   | 0.0001**  |
| N/Control | Lipase class 3                              | W7U7Q2_9STRA             | 46 kDa           | 4                      | 0.06  | 0.63      |
| N/Control | Lipase domain-containing protein            | W7TDJ3_9STRA             | 68 kDa           | 2                      | -0.21 | 0.17      |
| N/Control | Lipase family protein                       | W7TUB0_9STRA             | 54 kDa           | 8                      | 1.06  | 0.0001**  |
| N/Control | Lipase                                      | W7U0K9_9STRA             | 64 kDa           | 6                      | 0.58  | 0.0001**  |
| N/Control | Lipase, class 3 (Fragment)                  | W7TQA1_9STRA             | 53 kDa           | 8                      | 0.02  | 0.46      |
| N/Control | Lipase, class 3                             | W7U4G1_9STRA             | 68 kDa           | 6                      | 0.18  | 0.001**   |
| N/Control | Lipase, class 3                             | W7TNA7_9STRA             | 78 kDa           | 5                      | 0.15  | 0.12      |
| N/Control | Lysophospholipase II                        | K8Z7I5_NANGC             | 25 kDa           | 10                     | 0.11  | 0.01**    |
| N/Control | Lysophospholipase                           | W7U1W7_9STRA             | 112 kDa          | 5                      | 0.11  | 0.14      |
| N/Control | Lysophospholipase-like protein              | W7TTI2_9STRA             | 47 kDa           | 8                      | 0.29  | 0.00012** |
| N/Control | Monoglyceride lipase                        | W7TXG7_9STRA             | 40 kDa           | 4                      | -0.17 | 0.1       |
| N/Control | Phospholipase-like protein                  | W7T9K1_9STRA             | 67 kDa           | 2                      | -0.11 | 0.12      |
| N/Control | Triglyceride lipase                         | W7TSJ6_9STRA             | 86 kDa           | 4                      | 0.21  | 0.038*    |
| P/Control | Calcium-independent phospholipase a2-gamma  | K8Z805_NANGC             | 111 kDa          | 2                      | -0.11 | 0.43      |
| P/Control | Cluster of Putative lipase (Fragment)       | W7TJ50_9STRA             | 49 kDa           | 1                      | -0.01 | 0.93      |
| P/Control | Esterase lipase thioesterase family protein | K8Z5U7_NANGC             | 45 kDa           | 7                      | 0.04  | 0.41      |
| P/Control | Gdsl lipase acylhydrolase family protein    | K8YWS8_NANGC             | 38 kDa           | 4                      | 0.09  | 0.34      |
| P/Control | Lipase class 3                              | W7U7Q2_9STRA             | 46 kDa           | 4                      | 0.11  | 0.38      |
| P/Control | Lipase domain-containing protein            | W7TDJ3_9STRA             | 68 kDa           | 2                      | -0.17 | 0.14      |
| P/Control | Lipase family protein                       | W7TUB0_9STRA             | 54 kDa           | 8                      | -0.32 | 0.001**   |
| P/Control | Lipase                                      | W7U0K9_9STRA             | 64 kDa           | 6                      | -0.11 | 0.34      |
| P/Control | Lipase, class 3 (Fragment)                  | W7TQA1_9STRA             | 53 kDa           | 8                      | -0.03 | 0.79      |
| P/Control | Lipase, class 3                             | W7U4G1_9STRA             | 68 kDa           | 6                      | -0.09 | 0.17      |
| P/Control | Lipase, class 3                             | W7TNA7_9STRA             | 78 kDa           | 5                      | 0.0   | 0.8       |
| P/Control | Lysophospholipase II                        | K8Z7I5_NANGC             | 25 kDa           | 10                     | -0.03 | 0.5       |
| P/Control | Lysophospholipase                           | W7U1W7_9STRA             | 112 kDa          | 5                      | -0.36 | 0.096     |
| P/Control | Lysophospholipase-like protein              | W7TTI2_9STRA             | 47 kDa           | 8                      | -0.04 | 0.54      |
| P/Control | Monoglyceride lipase                        | W7TXG7_9STRA             | 40 kDa           | 4                      | -0.24 | 0.035*    |
| P/Control | Phospholipase-like protein                  | W7T9K1_9STRA             | 67 kDa           | 2                      | -0.11 | 0.16      |
| P/Control | Triglyceride lipase                         | W7TSJ6_9STRA             | 86 kDa           | 4                      | -0.18 | 0.4       |

**Supplementary Table 9.** Differential expression of proteins annotated as polyketide synthase in N-/Control and P-/Control treatments. None were determined significantly differently expressed either at the Benjamini-Hochberg adjusted p-value thresholds, or at the 5% level.

| Condition | Name                           | UniProt Accession Number | Molecular Weight | No. quantified spectra | Lzfc  | P-value |
|-----------|--------------------------------|--------------------------|------------------|------------------------|-------|---------|
| N/Control | Cluster of Polyketide synthase | W7U961_9STRA             | 331 kDa          | 95                     | -0.04 | 0.64    |
| N/Control | Polyketide synthase (Fragment) | I2CR04_NANGC             | 60 kDa           | 5                      | -0.02 | 0.75    |
| N/Control | Polyketide synthase            | W7U9U8_9STRA             | 171 kDa          | 3                      | -0.06 | 0.42    |
| N/Control | Polyketide synthase            | W7U042_9STRA             | 315 kDa          | 7                      | -0.05 | 0.64    |
| N/Control | Polyketide synthase            | W7T9I3_9STRA             | 69 kDa           | 5                      | -0.02 | 0.75    |
| N/Control | Type i polyketide synthase     | W7U1Y5_9STRA             | 330 kDa          | 42                     | 0.04  | 0.065   |
| P/Control | Cluster of Polyketide synthase | W7U961_9STRA             | 331 kDa          | 95                     | 0.04  | 0.17    |
| P/Control | Polyketide synthase (Fragment) | I2CR04_NANGC             | 60 kDa           | 5                      | -0.12 | 0.24    |
| P/Control | Polyketide synthase            | W7U9U8_9STRA             | 171 kDa          | 3                      | -0.09 | 0.44    |
| P/Control | Polyketide synthase            | W7U042_9STRA             | 315 kDa          | 7                      | 0.04  | 0.45    |
| P/Control | Polyketide synthase            | W7T9I3_9STRA             | 69 kDa           | 5                      | 0.02  | 0.75    |
| P/Control | Type i polyketide synthase     | W7U1Y5_9STRA             | 330 kDa          | 42                     | 0.03  | 0.84    |
