# Supplementary material for: Proteomic and Transcriptomic Patterns during Lipid Remodeling in Nannochloropsis gaditana
Source: Int J Mol Sci. 2020 Sep 22;21(18):6946. doi: 10.3390/ijms21186946 (PMC7554720; doi:10.3390/ijms21186946)
Supplement: Supplementary file 1 [file ijms-21-06946-s001.zip]

Archive with 9 entries (6 files):
- MDPI.nannochloropsis.mdpi.two.supp.files.zipped.R2/
- MDPI.nannochloropsis.mdpi.two.supp.files.zipped.R2/.DS_Store
- __MACOSX/
- __MACOSX/MDPI.nannochloropsis.mdpi.two.supp.files.zipped.R2/
- __MACOSX/MDPI.nannochloropsis.mdpi.two.supp.files.zipped.R2/._.DS_Store
- MDPI.nannochloropsis.mdpi.two.supp.files.zipped.R2/MDPI.nannochloropsis.supplementary.data.pdf
- __MACOSX/MDPI.nannochloropsis.mdpi.two.supp.files.zipped.R2/._MDPI.nannochloropsis.supplementary.data.pdf
- MDPI.nannochloropsis.mdpi.two.supp.files.zipped.R2/Proteomics.results.data.TMT.xlsx
- __MACOSX/MDPI.nannochloropsis.mdpi.two.supp.files.zipped.R2/._Proteomics.results.data.TMT.xlsx
