# Supplementary material for: Proteomic and Transcriptomic Patterns during Lipid Remodeling in Nannochloropsis gaditana
Source: Int J Mol Sci. 2020 Sep 22;21(18):6946. doi: 10.3390/ijms21186946 (PMC7554720; doi:10.3390/ijms21186946)
Supplement: Supplementary file 1 [file ijms-21-06946-s001.zip › MDPI.nannochloropsis.mdpi.two.supp.files.zipped.R2/Proteomics.results.data.TMT.xlsx]

## Sheet: Nitrogen vs Control
C496_TMT	Requires: min 2 peptides; 3%FDR at protein and peptide
								Control				Ex-A				Control				Ex-A
#	Identified Proteins	Accession Number	Alternate ID	Molecular Weight	No. quantified spectra	Log₂ Fold Change (Ex-A / Reference)	Permutation Test (p-value) Benjamini-Hochberg (p < 0.02169)	P1 - Log2 Norm Intensity	P3 - Log2 Norm Intensity	P5 - Log2 Norm Intensity	P7 - Log2 Norm Intensity	P2 - Log2 Norm Intensity	P4 - Log2 Norm Intensity	P6 - Log2 Norm Intensity	P8 - Log2 Norm Intensity	P1 - log2 F.C.	P3 - log2 F.C.	P5 - log2 F.C.	P7 - log2 F.C.	P2 - log2 F.C.	P4 - log2 F.C.	P6 - log2 F.C.	P8 - log2 F.C.
1	Acetyl-CoA carboxylase OS=Nannochloropsis gaditana (strain CCMP526) GN=NGATSA_3002800 PE=2 SV=1	I2CQP5_NANGC	NGATSA_3002800	235 kDa	397	-0.5	0.0001	16.45	16.61	16.61	16.6	16	16.05	16.12	16.17	-0.1243	0.0424	0.0445	0.038	-0.5766	-0.5195	-0.4482	-0.4069
2	Transketolase OS=Nannochloropsis gaditana GN=Naga_100001g128 PE=4 SV=1	W7TKJ5_9STRA	Naga_100001g128	77 kDa	286	-0.44	0.0001	16.78	16.97	16.74	16.82	16.41	16.42	16.33	16.41	-0.0572	0.1437	-0.0952	0.0003	-0.4173	-0.404	-0.5015	-0.4253
3	Cluster of Uncharacterized protein OS=Nannochloropsis gaditana (strain CCMP526) GN=NGA_0462000 PE=4 SV=1 (K8Z6N7_NANGC)	K8Z6N7_NANGC [2]	NGA_0462000	108 kDa	87	0.47	0.0001	16.54	16.48	16.41	16.5	17.26	16.87	16.9	16.87	0.0586	-0.0044	-0.0656	0.0273	0.7902	0.382	0.4247	0.3902
4	Elongation factor G, mitochondrial OS=Nannochloropsis gaditana GN=PEFG PE=3 SV=1	W7THY0_9STRA	PEFG	86 kDa	140	-0.5	0.0001	16.49	16.48	16.35	16.35	15.92	15.95	15.91	15.86	0.0901	0.0659	-0.0593	-0.0667	-0.5014	-0.4506	-0.4983	-0.5557
5	Geranylgeranyl reductase OS=Nannochloropsis gaditana GN=Naga_100207g6 PE=4 SV=1	W7THD6_9STRA	Naga_100207g6	57 kDa	137	-0.79	0.0001	17.23	17.21	17.15	17.12	16.36	16.43	16.34	16.42	0.0621	0.0424	-0.0209	-0.0479	-0.8134	-0.7371	-0.8267	-0.7498
6	Phosphoribosylformylglycinamidine synthase OS=Nannochloropsis gaditana GN=Naga_100003g69 PE=3 SV=1	W7UC18_9STRA	Naga_100003g69	145 kDa	126	0.61	0.0001	16.06	16.11	16.14	16.07	16.7	16.68	16.82	16.62	-0.0358	0.009	0.029	-0.0318	0.5957	0.585	0.7078	0.516
7	Inosine-5'-monophosphate dehydrogenase OS=Nannochloropsis gaditana GN=Naga_100003g133 PE=3 SV=1	W7UBV8_9STRA	Naga_100003g133	56 kDa	114	0.58	0.0001	15.85	15.92	15.94	15.91	16.5	16.39	16.55	16.5	-0.0587	0.0011	0.0274	-0.0029	0.5816	0.4758	0.6351	0.5823
8	Glutamate-1-semialdehyde aminotransferase/glutamate-1-semialdehyde 21-aminomutase OS=Nannochloropsis gaditana (strain CCMP526) GN=NGATSA_3004500 PE=2 SV=1	I2CQR0_NANGC	NGATSA_3004500	49 kDa	103	-0.63	0.0001	16.68	16.71	16.47	16.52	16.02	15.96	15.93	15.92	0.1005	0.1357	-0.1134	-0.0619	-0.5734	-0.6295	-0.6476	-0.6731
9	Enolase OS=Nannochloropsis gaditana GN=Naga_100009g67 PE=3 SV=1	W7TR29_9STRA	Naga_100009g67	49 kDa	85	0.48	0.0001	16.12	16.4	16.36	16.33	16.74	16.71	16.92	16.84	-0.1982	0.0831	0.0468	0.0143	0.4148	0.3902	0.5969	0.5124
10	Plasma membrane ATPase OS=Nannochloropsis gaditana (strain CCMP526) GN=NGA_0599100 PE=3 SV=1	K8YQB4_NANGC	NGA_0599100	107 kDa	68	0.77	0.0001	16.71	16.53	16.82	16.78	17.5	17.39	17.65	17.39	0.0006	-0.1833	0.0885	0.0515	0.7689	0.6717	0.9276	0.6725
11	Magnesium chelatase ATPase subunit I OS=Nannochloropsis gaditana GN=chlI PE=4 SV=1	K9ZV21_9STRA	chlI	47 kDa	59	-0.9	0.0001	17.26	17.12	17.07	17.07	16.19	16.27	16.24	16.19	0.1268	-0.0036	-0.0491	-0.0457	-0.9291	-0.8389	-0.8822	-0.922
12	Phosphoenolpyruvate carboxylase OS=Nannochloropsis gaditana GN=PPC PE=3 SV=1	W7TGA1_9STRA	PPC	108 kDa	59	0.42	0.0001	16.16	16.06	16.29	16.27	16.62	16.42	16.84	16.64	-0.0447	-0.1425	0.0847	0.0661	0.4185	0.2177	0.6331	0.4356
13	Trigger factor OS=Nannochloropsis gaditana (strain CCMP526) GN=NGA_0441901 PE=3 SV=1	K8Z9T8_NANGC	NGA_0441901	56 kDa	57	-0.6	0.0001	16.57	16.6	16.37	16.45	16.02	15.96	15.79	15.74	0.0775	0.1095	-0.1212	-0.0392	-0.4719	-0.5298	-0.6956	-0.7487
14	Porphobilinogen deaminase OS=Nannochloropsis gaditana GN=Naga_100003g83 PE=3 SV=1	W7UC09_9STRA	Naga_100003g83	39 kDa	57	-0.62	0.0001	17.07	17.12	16.95	16.94	16.37	16.51	16.34	16.32	0.0577	0.0895	-0.0585	-0.0691	-0.6555	-0.5055	-0.6753	-0.695
15	Trifunctional enzyme subunit mitochondrial OS=Nannochloropsis gaditana GN=Naga_100466g3 PE=3 SV=1	W7TLR9_9STRA	Naga_100466g3	62 kDa	45	0.45	0.0001	16.02	16.19	16.25	16.23	16.63	16.49	16.78	16.65	-0.1534	0.0122	0.0686	0.0566	0.4472	0.3182	0.5978	0.4757
16	Isocitrate lyase OS=Nannochloropsis gaditana GN=Naga_100025g12 PE=3 SV=1	W7TRS4_9STRA	Naga_100025g12	66 kDa	48	0.66	0.0001	15.95	16.19	16.07	16.12	16.65	16.8	16.81	16.76	-0.1471	0.0956	-0.0268	0.0348	0.5528	0.6924	0.713	0.6679
17	Nadp-dependent glyceraldehyde-3-phosphate dehydrogenase OS=Nannochloropsis gaditana GN=Naga_100042g43 PE=3 SV=1	W7U8W3_9STRA	Naga_100042g43	66 kDa	42	0.86	0.0001	15.47	15.58	15.68	15.65	16.43	16.42	16.54	16.42	-0.137	-0.022	0.072	0.049	0.8187	0.8217	0.9414	0.8286
18	30S ribosomal protein S2, chloroplastic OS=Nannochloropsis gaditana GN=rps2 PE=3 SV=1	K9ZWC8_9STRA	rps2	29 kDa	28	-0.83	0.0001	17.19	17.1	17.05	17.07	16.33	16.2	16.31	16.23	0.0958	0.0033	-0.0577	-0.0278	-0.7649	-0.8918	-0.7949	-0.8864
19	Elongation factor Tu OS=Nannochloropsis gaditana (strain CCMP526) GN=NGATSA_2022600 PE=2 SV=1	I2CP80_NANGC (+1)	NGATSA_2022600	45 kDa	160	-0.64	0.0001	15.68	15.62	15.58	15.56	14.98	15	14.95	14.96	0.0644	0.0198	-0.0131	-0.0286	-0.6203	-0.6041	-0.664	-0.6458
20	Hydantoin utilization protein a OS=Nannochloropsis gaditana GN=Naga_100001g69 PE=4 SV=1	W7U0Z1_9STRA	Naga_100001g69	147 kDa	35	0.64	0.0001	15.35	15.62	15.68	15.6	16.1	16.19	16.26	16.29	-0.2216	0.0513	0.1059	0.0352	0.5304	0.6259	0.6854	0.7104
21	50S ribosomal protein L5, chloroplastic OS=Nannochloropsis gaditana GN=rpl5 PE=3 SV=1	K9ZWD7_9STRA	rpl5	21 kDa	26	-0.62	0.0001	16.83	16.66	16.6	16.64	16.08	16.1	15.98	16.07	0.1533	-0.0159	-0.0749	-0.0362	-0.5883	-0.5744	-0.6863	-0.6018
22	Pentatricopeptide repeat containing protein OS=Nannochloropsis gaditana GN=Naga_101189g1 PE=4 SV=1	W7TRN0_9STRA	Naga_101189g1	26 kDa	58	-0.6	0.0001	16.9	16.73	16.69	16.7	16.19	16.17	16.06	16.2	0.1532	-0.0173	-0.0493	-0.0459	-0.5547	-0.5716	-0.6875	-0.5538
23	Cytochrome p450 OS=Nannochloropsis gaditana GN=CYP97F4 PE=3 SV=1	W7UBA8_9STRA	CYP97F4	70 kDa	34	-0.77	0.0001	16.38	16.41	16.36	16.32	15.55	15.71	15.51	15.61	0.0074	0.0342	-0.0033	-0.0412	-0.8007	-0.6508	-0.8521	-0.7468
24	Isocitrate dehydrogenase [NADP] OS=Nannochloropsis gaditana GN=Naga_100022g53 PE=3 SV=1	W7U1U2_9STRA	Naga_100022g53	51 kDa	88	0.4	0.0001	16.19	16.27	15.94	15.94	16.64	16.48	16.5	16.34	0.1053	0.1744	-0.1561	-0.1484	0.5562	0.3929	0.404	0.2576
25	Had-superfamily subfamily iia hydrolase OS=Nannochloropsis gaditana GN=Naga_100001g3 PE=4 SV=1	W7U270_9STRA	Naga_100001g3	43 kDa	21	0.74	0.0001	16.41	16.55	16.58	16.43	17.15	17.13	17.38	17.28	-0.1001	0.0533	0.0763	-0.0737	0.6425	0.6273	0.8591	0.7831
26	Lipid droplet surface protein OS=Nannochloropsis gaditana GN=Naga_100086g4 PE=4 SV=1	W7TWF7_9STRA	Naga_100086g4	18 kDa	21	1.93	0.0001	15.33	15.84	15.83	15.69	17.84	17.7	17.8	17.33	-0.3713	0.1418	0.1265	-0.0041	2.0851	1.9469	2.0336	1.5929
27	Amidophosphoribosyltransferase OS=Nannochloropsis gaditana GN=Naga_100017g65 PE=3 SV=1	W7TUG1_9STRA	Naga_100017g65	69 kDa	25	0.67	0.0001	15.02	15.24	15.34	15.36	15.89	15.83	16.02	15.93	-0.2246	-0.0212	0.0813	0.1085	0.6279	0.5824	0.7735	0.6695
28	GMP synthase (Glutamine-hydrolysing) OS=Nannochloropsis gaditana (strain CCMP526) GN=NGATSA_3005800 PE=2 SV=1	I2CQR9_NANGC	NGATSA_3005800	59 kDa	87	0.48	0.0001	16.52	16.53	16.32	16.37	17.04	16.92	16.96	16.76	0.0948	0.0956	-0.1146	-0.0651	0.6118	0.4825	0.5283	0.3135
29	Malic enzyme OS=Nannochloropsis gaditana (strain CCMP526) GN=NGATSA_3021500 PE=2 SV=1	I2CP02_NANGC	NGATSA_3021500	72 kDa	23	0.56	0.0001	15.38	15.54	15.44	15.5	15.95	15.95	16.16	16.03	-0.0894	0.0781	-0.028	0.0351	0.4884	0.4715	0.6803	0.5596
30	D-3-phosphoglycerate dehydrogenase OS=Nannochloropsis gaditana GN=PDGH PE=3 SV=1	W7U408_9STRA	PDGH	105 kDa	89	0.37	0.0001	16.37	16.45	16.45	16.47	16.68	16.72	16.94	16.92	-0.0665	0.0099	0.0115	0.0291	0.2485	0.2868	0.5009	0.481
31	50S ribosomal protein L13, chloroplastic OS=Nannochloropsis gaditana GN=rpl13 PE=3 SV=1	K9ZVB5_9STRA	rpl13	16 kDa	26	-0.55	0.0001	16.68	16.42	16.44	16.52	16	15.9	15.89	16.02	0.1778	-0.092	-0.0655	0.0209	-0.5059	-0.6073	-0.61	-0.4943
32	Delta-aminolevulinic acid dehydratase OS=Nannochloropsis gaditana GN=hemB PE=3 SV=1	W7TUE6_9STRA	hemB	47 kDa	43	-0.51	0.0001	16.18	16.08	15.89	15.93	15.58	15.56	15.45	15.41	0.1748	0.0682	-0.1168	-0.0816	-0.4293	-0.4476	-0.5624	-0.6032
33	Long chain acyl-coa synthetase OS=Nannochloropsis gaditana GN=LACS PE=4 SV=1	W7TGG5_9STRA	LACS	71 kDa	74	0.36	0.0001	16.52	16.36	16.43	16.47	16.9	16.67	16.88	16.73	0.0785	-0.0926	-0.0155	0.026	0.4635	0.2264	0.4382	0.2816
34	Delta-1-pyrroline-5-carboxylate synthetase OS=Nannochloropsis gaditana GN=Naga_100006g64 PE=3 SV=1	W7U194_9STRA	Naga_100006g64	81 kDa	86	-0.45	0.0001	15.84	15.9	15.83	15.9	15.35	15.47	15.45	15.4	-0.0312	0.0257	-0.0455	0.0354	-0.5181	-0.4034	-0.4208	-0.4688
35	30s ribosomal protein s1 OS=Nannochloropsis gaditana GN=rps1 PE=4 SV=1	W7TJ69_9STRA	rps1	51 kDa	63	-0.65	0.0001	16.47	16.32	16.3	16.23	15.77	15.67	15.58	15.67	0.1599	-0.0001	-0.018	-0.0866	-0.5649	-0.6492	-0.7335	-0.6482
36	Heat shock protein 70 OS=Nannochloropsis gaditana GN=Naga_100001g41 PE=3 SV=1	W7U263_9STRA	Naga_100001g41	73 kDa	105	0.26	0.0001	16.1	16.09	16.13	16.12	16.41	16.36	16.38	16.33	-0.014	-0.0291	0.016	0.003	0.2953	0.2479	0.256	0.2153
37	U5 small nuclear ribonucleoprotein helicase OS=Nannochloropsis gaditana GN=Naga_100066g24 PE=4 SV=1	W7TFU8_9STRA	Naga_100066g24	248 kDa	45	0.3	0.0001	15.42	15.38	15.52	15.49	15.75	15.7	15.83	15.72	-0.0351	-0.0734	0.0633	0.0381	0.2947	0.2483	0.3769	0.2747
38	Photosystem II CP47 reaction center protein OS=Nannochloropsis gaditana GN=cp47 PE=3 SV=1	K9ZW94_9STRA	cp47	57 kDa	249	-0.33	0.0001	16.57	16.7	16.63	16.68	16.31	16.48	16.3	16.17	-0.0857	0.0526	-0.0124	0.0336	-0.3455	-0.1671	-0.3499	-0.4767
39	Pyruvate decarboxylase OS=Nannochloropsis gaditana (strain CCMP526) GN=PDC PE=3 SV=1	K8YS66_NANGC	PDC	62 kDa	50	0.51	0.0001	16.16	16.21	16.13	16.01	16.7	16.63	16.63	16.62	0.0259	0.0786	-0.0012	-0.1276	0.5704	0.4915	0.4901	0.4787
40	50S ribosomal protein L2, chloroplastic OS=Nannochloropsis gaditana GN=rpl2 PE=3 SV=1	K9ZXH4_9STRA	rpl2	30 kDa	36	-0.65	0.0001	17.15	17.1	17.03	17.08	16.46	16.52	16.46	16.27	0.0692	0.0047	-0.0578	-0.0146	-0.6333	-0.5684	-0.6192	-0.8108
41	50S ribosomal protein L23, chloroplastic OS=Nannochloropsis gaditana GN=rpl23 PE=3 SV=1	K9ZVD0_9STRA (+1)	rpl23	14 kDa	27	-0.63	0.0001	17.49	17.24	17.25	17.22	16.77	16.66	16.62	16.57	0.2193	-0.0376	-0.0304	-0.0622	-0.5212	-0.6165	-0.6526	-0.7017
42	Heat shock protein 90 OS=Nannochloropsis gaditana GN=HSP1 PE=3 SV=1	W7TLX6_9STRA	HSP1	92 kDa	106	-0.37	0.0001	15.81	15.81	15.7	15.73	15.42	15.44	15.3	15.33	0.0393	0.0451	-0.0644	-0.0351	-0.3328	-0.3195	-0.4688	-0.4326
43	Phosphoribosylaminoimidazolecarboxamide formyltransferase / IMP cyclohydrolase (Fragment) OS=Nannochloropsis gaditana (strain CCMP526) GN=PURH PE=3 SV=1	K8YRA1_NANGC	PURH	71 kDa	66	0.46	0.0001	15.9	15.93	15.9	15.89	16.37	16.27	16.43	16.37	-0.0032	0.0277	-0.0084	-0.023	0.4623	0.3869	0.5176	0.46
44	Methylenetetrahydrofolate dehydrogenase OS=Nannochloropsis gaditana GN=Naga_100064g3 PE=4 SV=1	W7T6I6_9STRA	Naga_100064g3	39 kDa	20	1.3	0.0001	16.13	16.27	16.48	16.33	17.73	17.39	17.76	17.58	-0.1786	-0.0491	0.1582	0.0153	1.4017	1.079	1.4211	1.2572
45	Amine oxidase OS=Nannochloropsis gaditana GN=Naga_100118g4 PE=3 SV=1	W7TFN3_9STRA	Naga_100118g4	75 kDa	18	1.38	0.0001	15.15	15.54	15.54	15.32	16.67	16.74	16.87	16.81	-0.2568	0.1281	0.1308	-0.0914	1.2292	1.3216	1.4396	1.4166
46	Aconitate hydratase, mitochondrial OS=Nannochloropsis gaditana GN=Naga_100003g67 PE=3 SV=1	W7TSY3_9STRA	Naga_100003g67	89 kDa	86	0.38	0.0001	16.01	16.11	16.07	16.06	16.26	16.35	16.55	16.61	-0.0552	0.0407	-0.0085	-0.0023	0.1986	0.2955	0.4844	0.5345
47	Aldehyde dehydrogenase OS=Nannochloropsis gaditana GN=Naga_100154g13 PE=3 SV=1	W7TYJ1_9STRA	Naga_100154g13	62 kDa	18	0.56	0.0001	15.73	15.94	15.95	15.91	16.42	16.41	16.53	16.43	-0.16	0.0547	0.0604	0.0216	0.5413	0.5244	0.6344	0.5577
48	Sulfate adenylyltransferase OS=Nannochloropsis gaditana (strain CCMP526) GN=MET3 PE=4 SV=1	K8YU22_NANGC (+1)	MET3	47 kDa	55	-0.65	0.0001	16.92	16.78	16.74	16.81	16.19	16.07	16.2	16.19	0.1154	-0.0289	-0.0671	0.0086	-0.6124	-0.7267	-0.5969	-0.6309
49	Thiamine biosynthesis protein OS=Nannochloropsis gaditana GN=Naga_100257g4 PE=3 SV=1	W7U450_9STRA	Naga_100257g4	71 kDa	49	-0.63	0.0001	16.13	16.12	15.96	15.95	15.46	15.41	15.37	15.36	0.094	0.0947	-0.0754	-0.0868	-0.6003	-0.6226	-0.639	-0.6484
50	Uncharacterized protein OS=Nannochloropsis gaditana GN=Naga_100040g46 PE=4 SV=1	W7TTV6_9STRA	Naga_100040g46	35 kDa	10	0.62	0.0001	16.86	16.88	16.83	16.8	17.46	17.54	17.46	17.42	0.0149	0.0401	-0.0158	-0.0424	0.6121	0.6911	0.6198	0.5628
51	Glutathione reductase (NADPH) OS=Nannochloropsis gaditana (strain CCMP526) GN=GSR PE=3 SV=1	K8YUL8_NANGC (+1)	GSR	57 kDa	40	0.39	0.0001	16.57	16.54	16.57	16.51	17.1	16.82	16.93	16.91	0.0128	-0.012	0.0261	-0.0415	0.5495	0.2742	0.3828	0.3567
52	Magnesium-protoporphyrin IX monomethyl ester [oxidative] cyclase OS=Nannochloropsis gaditana GN=ycf59 PE=3 SV=1	K9ZWB6_9STRA (+1)	ycf59	41 kDa	38	-0.53	0.0001	16.27	16.11	16.15	16.15	15.61	15.66	15.7	15.55	0.1035	-0.0502	-0.0233	-0.0179	-0.5567	-0.5237	-0.4661	-0.62
53	50S ribosomal protein L4 OS=Nannochloropsis gaditana GN=rpl4 PE=4 SV=1	K9ZX06_9STRA	rpl4	29 kDa	28	-0.63	0.0001	16.99	16.76	16.66	16.75	16.2	16.14	16.16	16.11	0.2278	-0.0153	-0.1239	-0.0237	-0.5744	-0.6406	-0.6044	-0.6704
54	Adenylosuccinate lyase OS=Nannochloropsis gaditana GN=Naga_100010g59 PE=3 SV=1	W7TJC3_9STRA	Naga_100010g59	62 kDa	43	0.58	0.0001	16.36	16.44	16.37	16.3	16.79	16.91	17.04	17.05	-0.0064	0.0723	-0.0078	-0.0759	0.4232	0.5412	0.6645	0.6778
55	Phosphoribosylformylglycinamidine cyclo-ligase OS=Nannochloropsis gaditana GN=Naga_100190g12 PE=4 SV=1	W7TYA7_9STRA	Naga_100190g12	43 kDa	38	0.64	0.0001	16.25	16.2	16.12	16.06	16.99	16.72	16.8	16.69	0.0989	0.0394	-0.0348	-0.1055	0.8207	0.5639	0.6271	0.5062
56	Succinate-CoA ligase subunit beta OS=Nannochloropsis gaditana GN=Naga_100047g7 PE=3 SV=1	W7TB36_9STRA (+1)	Naga_100047g7	46 kDa	68	0.36	0.0001	16.44	16.44	16.46	16.48	16.76	16.78	16.94	16.83	-0.0201	-0.0119	0.0118	0.0193	0.2967	0.3177	0.4777	0.3651
57	Succinate-semialdehyde dehydrogenase OS=Nannochloropsis gaditana GN=Naga_100031g34 PE=3 SV=1	W7U115_9STRA	Naga_100031g34	61 kDa	27	0.44	0.0001	16.36	16.5	16.44	16.44	16.84	16.94	16.88	16.83	-0.0691	0.0588	-0.0061	0.006	0.4095	0.5046	0.4425	0.3998
58	30S ribosomal protein S8, chloroplastic OS=Nannochloropsis gaditana GN=rps8 PE=3 SV=1	K9ZV68_9STRA	rps8	15 kDa	12	-0.86	0.0001	16.35	16.24	16.33	16.05	15.25	15.39	15.58	15.14	0.1292	0.0116	0.0963	-0.1801	-0.9916	-0.835	-0.6408	-1.0627
59	30S ribosomal protein S18, chloroplastic OS=Nannochloropsis gaditana GN=rps18 PE=3 SV=1	K9ZV97_9STRA	rps18	8 kDa	9	-0.97	0.0001	18.47	18.64	18.73	18.67	17.35	17.8	17.75	17.66	-0.1552	0.0154	0.0956	0.0395	-1.2721	-0.8206	-0.8771	-0.9535
60	ATP synthase subunit beta (Fragment) OS=Nannochloropsis gaditana (strain CCMP526) GN=ATPEF1B PE=3 SV=1	K8YN83_NANGC (+1)	ATPEF1B	77 kDa	209	0.26	0.0001	16.11	16.19	16.12	16.11	16.53	16.34	16.32	16.39	-0.0124	0.0502	-0.0169	-0.0294	0.3922	0.1977	0.1871	0.248
61	Transketolase OS=Nannochloropsis gaditana GN=PDH PE=4 SV=1	W7TYT3_9STRA	PDH	88 kDa	121	-0.39	0.0001	16.54	16.53	16.44	16.44	16.11	16.17	16.06	16.07	0.0487	0.049	-0.0479	-0.0403	-0.3877	-0.3262	-0.4413	-0.4266
62	50s ribosomal protein l21 OS=Nannochloropsis gaditana (strain CCMP526) GN=NGATSA_2035000 PE=2 SV=1	I2CRJ9_NANGC (+2)	NGATSA_2035000	18 kDa	21	-0.58	0.0001	16.61	16.4	16.25	16.3	15.92	15.8	15.76	15.67	0.2315	0.027	-0.1215	-0.07	-0.4543	-0.5869	-0.6108	-0.7227
63	Solute carrier family 25 (Mitochondrial carrier citrate transporter) member 1 OS=Nannochloropsis gaditana (strain CCMP526) GN=NGA_0283102 PE=3 SV=1	K8YX95_NANGC (+1)	NGA_0283102	32 kDa	14	0.63	0.0001	16.31	16.35	16.45	16.42	17.14	16.79	17.2	16.96	-0.0697	-0.0369	0.0649	0.0344	0.748	0.393	0.7966	0.5672
64	Heat shock protein 90 OS=Nannochloropsis gaditana GN=Hsp PE=3 SV=1	W7TNF9_9STRA	Hsp	95 kDa	109	-0.35	0.0001	16.7	16.56	16.39	16.58	16.35	16.21	16.13	16.12	0.1579	0.0115	-0.1682	0.0297	-0.1979	-0.3344	-0.4142	-0.4222
65	Putative rubisco expression protein OS=Nannochloropsis gaditana GN=cbbX PE=4 SV=1	K9ZXG9_9STRA	cbbX	39 kDa	76	-0.36	0.0001	17.01	16.95	16.86	16.82	16.59	16.58	16.54	16.51	0.1099	0.0502	-0.035	-0.074	-0.3109	-0.3181	-0.3626	-0.3816
66	Dihydrolipoamide dehydrogenase OS=Nannochloropsis gaditana GN=GCSL PE=3 SV=1	W7TT47_9STRA	GCSL	58 kDa	87	-0.46	0.0001	16.6	16.48	16.39	16.46	16.13	16.05	16	15.87	0.1348	-0.0004	-0.0967	-0.0051	-0.3354	-0.4345	-0.4803	-0.6099
67	Lipase family protein OS=Nannochloropsis gaditana GN=Naga_100046g19 PE=4 SV=1	W7TUB0_9STRA	Naga_100046g19	54 kDa	8	1.06	0.0001	15.87	16.39	16.15	16	17.22	16.99	17.14	17.34	-0.2322	0.285	0.0366	-0.114	1.1052	0.866	1.0328	1.2154
68	30S ribosomal protein S12, chloroplastic OS=Nannochloropsis gaditana GN=rps12 PE=3 SV=1	K9ZVC5_9STRA	rps12	14 kDa	6	-0.88	0.0001	17.65	17.76	17.79	17.82	16.85	16.86	16.95	16.86	-0.0954	0.0043	0.0311	0.062	-0.9043	-0.8859	-0.8005	-0.9092
69	50S ribosomal protein L6, chloroplastic OS=Nannochloropsis gaditana GN=rpl6 PE=3 SV=1	K9ZXJ2_9STRA	rpl6	20 kDa	30	-0.74	0.0001	15.55	15.46	15.5	15.5	14.73	14.72	14.76	14.78	0.0464	-0.0315	0.0202	0.009	-0.778	-0.8003	-0.7331	-0.698
70	Manganese lipoxygenase OS=Nannochloropsis gaditana GN=Naga_100546g4 PE=4 SV=1	W7TYD4_9STRA	Naga_100546g4	73 kDa	33	0.77	0.0001	16.24	16.28	16.81	16.88	17.18	17.02	17.6	18.03	-0.3718	-0.3334	0.2066	0.2738	0.559	0.4081	0.9778	1.4033
71	Chloroplast sedoheptulose--bisphosphatase OS=Nannochloropsis gaditana GN=SBP PE=3 SV=1	W7TFY2_9STRA	SBP	40 kDa	103	-0.47	0.0001	16.26	16.28	16.09	16.19	15.84	15.7	15.66	15.67	0.0584	0.0939	-0.1071	0.0105	-0.3702	-0.4993	-0.5267	-0.528
72	Glutamate dehydrogenase OS=Nannochloropsis gaditana GN=GDH1 PE=3 SV=1	W7TAN4_9STRA	GDH1	56 kDa	50	0.38	0.0001	17.27	17.12	17.33	17.27	17.6	17.38	17.92	17.67	0.0193	-0.1411	0.0792	0.0092	0.3465	0.1226	0.6672	0.411
73	Glutamate synthase (NADPH/NADH) small chain OS=Nannochloropsis gaditana (strain CCMP526) GN=NGATSA_3003400 PE=2 SV=1	I2CNZ7_NANGC	NGATSA_3003400	63 kDa	44	0.43	0.0001	15.96	15.84	16.08	16.03	16.37	16.24	16.62	16.42	-0.0262	-0.1417	0.0959	0.0406	0.3881	0.2544	0.6241	0.4372
74	Zeta-carotene desaturase OS=Nannochloropsis gaditana GN=ZDS PE=4 SV=1	W7UB54_9STRA	ZDS	67 kDa	32	-0.33	0.0001	16	16.04	15.99	15.97	15.68	15.68	15.65	15.66	-0.0042	0.0353	-0.0113	-0.0321	-0.317	-0.3188	-0.3445	-0.34
75	Succinyl-ligase subunit mitochondrial OS=Nannochloropsis gaditana GN=Naga_100031g28 PE=3 SV=1	W7U0D4_9STRA	Naga_100031g28	36 kDa	38	0.36	0.0001	16.49	16.47	16.46	16.52	16.76	16.77	16.98	16.87	0.0124	-0.0168	-0.028	0.0245	0.2705	0.2901	0.4911	0.3811
76	30s ribosomal protein s15 OS=Nannochloropsis gaditana GN=Naga_100070g2 PE=3 SV=1	W7TEF2_9STRA (+1)	Naga_100070g2	34 kDa	18	-0.77	0.0001	16.62	16.61	16.68	16.54	15.71	15.9	15.84	15.86	0.009	-0.0038	0.0644	-0.0791	-0.9106	-0.7132	-0.7651	-0.7371
77	Ribulose bisphosphate carboxylase large chain OS=Nannochloropsis gaditana GN=rbcL PE=3 SV=1	K9ZV74_9STRA	rbcL	54 kDa	601	-0.46	0.0001	16.03	16.28	16.09	16.12	15.63	15.79	15.64	15.74	-0.1026	0.1494	-0.0491	-0.011	-0.536	-0.3512	-0.4987	-0.4206
78	Glutamate synthase OS=Nannochloropsis gaditana GN=Naga_100005g23 PE=4 SV=1	W7TEE5_9STRA	Naga_100005g23	180 kDa	67	-0.25	0.0001	16.08	16.09	16.01	15.96	15.72	15.86	15.79	15.8	0.0519	0.0581	-0.019	-0.067	-0.3064	-0.1747	-0.2433	-0.2301
79	Phosphoglycerate kinase OS=Nannochloropsis gaditana GN=Naga_100410g3 PE=3 SV=1	W7TJY6_9STRA	Naga_100410g3	51 kDa	147	-0.39	0.0001	16.89	17.01	17.16	17.18	16.67	16.68	16.63	16.79	-0.2031	-0.061	0.0825	0.1193	-0.41	-0.3991	-0.4441	-0.2936
80	30S ribosomal protein S7, chloroplastic OS=Nannochloropsis gaditana GN=rps7 PE=3 SV=1	K9ZV58_9STRA	rps7	18 kDa	33	-0.69	0.0001	17.43	17.62	17.7	17.64	16.78	16.96	16.94	16.96	-0.1758	0.0381	0.0983	0.0503	-0.8291	-0.6345	-0.6643	-0.6252
81	Rubisco expression protein OS=Nannochloropsis gaditana GN=cbbX PE=4 SV=1	W7TPW8_9STRA	cbbX	46 kDa	55	-0.35	0.0001	16.64	16.63	16.54	16.49	16.2	16.24	16.24	16.21	0.0753	0.0551	-0.0268	-0.081	-0.3772	-0.3354	-0.3364	-0.3653
82	Elongation factor 2 OS=Nannochloropsis gaditana GN=EF2 PE=4 SV=1	W7UBY1_9STRA	EF2	96 kDa	179	-0.26	0.0001	16.64	16.49	16.49	16.58	16.44	16.21	16.33	16.14	0.1004	-0.0512	-0.0635	0.0343	-0.1041	-0.3425	-0.224	-0.4088
83	Large subunit ribosomal protein L26e OS=Nannochloropsis gaditana (strain CCMP526) GN=RP-L26E PE=4 SV=1	K8ZA47_NANGC (+1)	RP-L26E	23 kDa	26	-0.57	0.0001	17.81	17.74	17.72	17.75	17.17	17.18	17.21	17.19	0.0606	-0.0163	-0.0299	0.0057	-0.5786	-0.564	-0.5367	-0.5635
84	Exo-beta--glucanase OS=Nannochloropsis gaditana GN=Naga_100034g4 PE=4 SV=1	W7TW19_9STRA	Naga_100034g4	84 kDa	43	0.49	0.0001	16.5	16.36	16.23	16.26	17.08	16.76	16.85	16.65	0.1704	0.0118	-0.1073	-0.0872	0.7393	0.4214	0.5152	0.3165
85	Ras-related protein Rab-5C (Fragment) OS=Nannochloropsis gaditana (strain CCMP526) GN=RAB5C PE=4 SV=1	K8YWB7_NANGC (+1)	RAB5C	29 kDa	12	0.55	0.0001	16.83	16.72	16.81	16.72	17.39	17.34	17.32	17.29	0.0705	-0.045	0.0422	-0.0579	0.6047	0.5621	0.5415	0.5169
86	Elongation factor Ts, mitochondrial OS=Nannochloropsis gaditana (strain CCMP526) GN=NGATSA_3023400 PE=2 SV=1	I2CRC5_NANGC	NGATSA_3023400	37 kDa	78	-0.52	0.0001	16.19	16.19	16.1	16.11	15.66	15.6	15.62	15.6	0.0474	0.052	-0.0532	-0.0369	-0.5004	-0.5461	-0.5315	-0.5444
87	Vacuolar h+-atpase a subunit OS=Nannochloropsis gaditana GN=Naga_100003g103 PE=3 SV=1	W7UBF9_9STRA	Naga_100003g103	68 kDa	96	0.26	0.0001	15.93	16.06	15.99	15.98	16.17	16.27	16.25	16.3	-0.0697	0.074	-0.0069	-0.0173	0.1707	0.2792	0.2492	0.3163
88	Adenosylhomocysteinase OS=Nannochloropsis gaditana GN=Naga_100041g31 PE=3 SV=1	W7T232_9STRA	Naga_100041g31	65 kDa	118	-0.38	0.0001	16.66	16.77	16.42	16.53	16.27	16.31	16.16	16.08	0.0678	0.1848	-0.165	-0.0596	-0.327	-0.282	-0.4311	-0.512
89	50S ribosomal protein L12, chloroplastic OS=Nannochloropsis gaditana GN=rpl12 PE=3 SV=1	K9ZWF9_9STRA	rpl12	14 kDa	37	-0.55	0.0001	17.37	17.27	17.08	17.1	16.86	16.57	16.51	16.62	0.1711	0.0849	-0.0986	-0.0792	-0.3309	-0.6197	-0.6771	-0.5642
90	30S ribosomal protein S16, chloroplastic OS=Nannochloropsis gaditana GN=rps16 PE=3 SV=1	K9ZX76_9STRA	rps16	10 kDa	9	-0.75	0.0001	17.66	17.61	17.56	17.66	16.82	16.84	16.93	16.9	0.0267	-0.0185	-0.0618	0.0314	-0.8058	-0.7891	-0.6954	-0.7066
91	50S ribosomal protein L3, chloroplastic OS=Nannochloropsis gaditana GN=rpl3 PE=3 SV=1	A0A023PKE1_9STRA	rpl3	25 kDa	40	-0.49	0.0001	16.74	16.6	16.61	16.65	16.29	16.13	16.11	16.11	0.0925	-0.0476	-0.035	0.0032	-0.357	-0.5206	-0.5336	-0.5495
92	2-oxoglutarate dehydrogenase e1 component OS=Nannochloropsis gaditana GN=Naga_100117g8 PE=4 SV=1	W7TVJ9_9STRA	Naga_100117g8	117 kDa	54	0.29	0.0001	16.06	16.12	16.09	16.06	16.25	16.34	16.47	16.4	-0.023	0.0334	0.0026	-0.0267	0.1723	0.256	0.3848	0.3283
93	Poly binding cytoplasmic isoform cra_c OS=Nannochloropsis gaditana GN=Naga_100041g5 PE=4 SV=1	W7TC34_9STRA	Naga_100041g5	25 kDa	30	0.55	0.0001	16.5	16.44	16.43	16.42	17.08	16.92	17.01	16.98	0.056	-0.0136	-0.0255	-0.0434	0.6325	0.4681	0.5494	0.5277
94	Alternative oxidase OS=Nannochloropsis gaditana GN=Naga_100568g3 PE=4 SV=1	W7TTV4_9STRA	Naga_100568g3	42 kDa	21	0.69	0.0001	15.58	15.35	15.56	15.53	16.24	16.09	16.27	16.18	0.0607	-0.16	0.0487	0.0143	0.7251	0.5927	0.7594	0.6678
95	Acyl-dehydrogenase OS=Nannochloropsis gaditana GN=Naga_100002g172 PE=4 SV=1	W7TNX9_9STRA	Naga_100002g172	83 kDa	84	0.19	0.0001	16.41	16.46	16.38	16.45	16.66	16.55	16.65	16.64	-0.0141	0.0352	-0.0526	0.0213	0.2324	0.1214	0.2147	0.2134
96	50S ribosomal protein L1, chloroplastic OS=Nannochloropsis gaditana GN=rpl1 PE=3 SV=1	A0A023PJP4_9STRA (+2)	rpl1	25 kDa	35	-0.57	0.0001	17.61	17.58	17.52	17.57	16.95	17.03	17	16.96	0.0352	0.017	-0.0439	0.0161	-0.6091	-0.5376	-0.5662	-0.602
97	Trifunctional purine biosynthetic protein adenosine-3 OS=Nannochloropsis gaditana GN=Naga_100001g134 PE=3 SV=1	W7U1U7_9STRA	Naga_100001g134	66 kDa	49	0.32	0.0001	16.52	16.63	16.65	16.6	16.89	16.82	17.03	16.93	-0.0917	0.0285	0.0498	-0.0052	0.2941	0.212	0.4281	0.3319
98	Atp dependent rna helicase OS=Nannochloropsis gaditana GN=Naga_100054g8 PE=3 SV=1	W7TYZ7_9STRA	Naga_100054g8	70 kDa	25	0.42	0.0001	15.86	15.7	15.99	15.94	16.32	16.15	16.43	16.29	-0.0071	-0.1801	0.1046	0.0606	0.4532	0.2834	0.5473	0.4146
99	Glucose sorbosone dehydrogenase OS=Nannochloropsis gaditana GN=MCO PE=4 SV=1	W7TLL8_9STRA	MCO	109 kDa	3	0.65	0.0001	15.01	15.21	15.25	15.12	15.86	15.7	15.78	15.86	-0.136	0.0646	0.0993	-0.0238	0.7011	0.5527	0.6296	0.7079
100	Nitrite reductase (Fragment) OS=Nannochloropsis gaditana GN=Naga_100852g1 PE=4 SV=1	W7T0E9_9STRA	Naga_100852g1	46 kDa	30	-0.85	0.0001	16.07	16.35	16.1	16.07	15.41	15.25	15.27	15.3	-0.0786	0.225	-0.0301	-0.0583	-0.717	-0.8906	-0.8811	-0.8596
101	Rna binding s1 domain protein OS=Nannochloropsis gaditana GN=Naga_100007g107 PE=4 SV=1	W7U882_9STRA	Naga_100007g107	45 kDa	32	-0.77	0.0001	16.4	16.65	16.55	16.53	15.74	15.82	15.7	15.79	-0.1724	0.1075	0.018	-0.008	-0.8127	-0.7299	-0.8576	-0.7618
102	Phosphoribosylpyrophosphate synthetase OS=Nannochloropsis gaditana GN=Naga_100124g18 PE=4 SV=1	W7TU78_9STRA	Naga_100124g18	45 kDa	26	0.43	0.0001	15.92	16.12	16.11	16.08	16.38	16.54	16.52	16.54	-0.1519	0.0607	0.052	0.0213	0.317	0.4656	0.4461	0.477
103	40S ribosomal protein S8 OS=Nannochloropsis gaditana GN=Naga_100016g46 PE=3 SV=1	W7TXP8_9STRA	Naga_100016g46	24 kDa	51	-0.28	0.0001	17.29	17.32	17.42	17.49	16.97	17.08	17.23	17.12	-0.0974	-0.0587	0.0362	0.1129	-0.4095	-0.3047	-0.1589	-0.2654
104	Uncharacterized protein OS=Nannochloropsis gaditana GN=Naga_101131g1 PE=4 SV=1	W7TT72_9STRA	Naga_101131g1	17 kDa	15	-0.61	0.0001	17.04	16.87	16.82	16.83	16.37	16.16	16.3	16.26	0.1559	-0.0081	-0.0635	-0.0531	-0.5166	-0.7179	-0.5875	-0.6252
105	Uncharacterized protein OS=Nannochloropsis gaditana GN=Naga_100055g12 PE=4 SV=1	W7TEP8_9STRA	Naga_100055g12	63 kDa	26	-0.4	0.0001	17.09	17.05	16.91	16.93	16.67	16.63	16.56	16.49	0.1091	0.0568	-0.0715	-0.0562	-0.3255	-0.3611	-0.4324	-0.5027
106	Rab family gtpase OS=Nannochloropsis gaditana GN=Rab1B PE=4 SV=1	W7TST3_9STRA	Rab1B	22 kDa	40	0.33	0.0001	16.51	16.42	16.45	16.38	16.82	16.75	16.81	16.65	0.0697	-0.0234	0.0133	-0.0553	0.3792	0.3145	0.3756	0.2204
107	ATP synthase subunit alpha OS=Nannochloropsis gaditana GN=atp1 PE=3 SV=1	T1R8A9_9STRA	atp1	58 kDa	169	0.35	0.0001	16.74	16.71	16.68	16.67	17.14	16.98	17.05	17.02	0.0461	0.008	-0.0153	-0.0268	0.4381	0.2812	0.3387	0.3279
108	Malate cytoplasmic isoform 2 OS=Nannochloropsis gaditana GN=Naga_100008g23 PE=3 SV=1	W7TPM0_9STRA	Naga_100008g23	37 kDa	17	0.76	0.0001	15.62	15.59	15.67	15.65	16.32	16.52	16.43	16.41	-0.024	-0.0465	0.0399	0.0126	0.6769	0.87	0.788	0.7676
109	Uncharacterized protein (Fragment) OS=Nannochloropsis gaditana GN=Naga_101315g2 PE=4 SV=1	W7TJ35_9STRA	Naga_101315g2	16 kDa	8	0.66	0.0001	15.15	15.4	15.25	15.08	15.96	15.79	16	15.82	-0.0792	0.1708	0.02	-0.1417	0.7311	0.5595	0.7756	0.5999
110	Photosystem I reaction center subunit II OS=Nannochloropsis gaditana GN=psaD PE=4 SV=1	K9ZXL1_9STRA	psaD	15 kDa	73	-0.31	0.0001	16.79	16.75	16.69	16.64	16.48	16.36	16.41	16.34	0.0731	0.0393	-0.0198	-0.0665	-0.2432	-0.3547	-0.3069	-0.3735
111	Coproporphyrinogen iii oxidase chloroplast OS=Nannochloropsis gaditana GN=Naga_100665g2 PE=4 SV=1	W7TZ92_9STRA	Naga_100665g2	46 kDa	32	-0.79	0.0001	16.8	16.86	16.58	16.51	15.88	15.93	15.85	15.79	0.133	0.1951	-0.0778	-0.1567	-0.7879	-0.7373	-0.8176	-0.8596
112	Conserved hypothetical plastid protein Ycf54 OS=Nannochloropsis gaditana GN=ycf54 PE=4 SV=1	K9ZXN1_9STRA	ycf54	13 kDa	16	-0.72	0.0001	16.27	16.19	15.98	15.88	15.41	15.51	15.21	15.22	0.2348	0.1253	-0.0772	-0.1777	-0.6595	-0.554	-0.8545	-0.8295
113	Large subunit ribosomal protein L10 OS=Nannochloropsis gaditana (strain CCMP526) GN=NGATSA_3024500 PE=2 SV=1	I2CRD4_NANGC	NGATSA_3024500	25 kDa	22	-0.54	0.0001	16.48	16.3	16.29	16.32	15.91	15.77	15.72	15.77	0.1332	-0.0304	-0.0469	-0.0247	-0.4402	-0.5682	-0.6348	-0.5949
114	Vacuolar h+ atpase b subunit OS=Nannochloropsis gaditana GN=Naga_100113g20 PE=3 SV=1	W7TUD0_9STRA	Naga_100113g20	62 kDa	97	0.3	0.0001	15.41	15.55	15.47	15.44	15.77	15.76	15.75	15.79	-0.0668	0.0794	0.0077	-0.0291	0.3028	0.2967	0.2879	0.3051
115	Mitochondrial-processing peptidase alpha subunit OS=Nannochloropsis gaditana GN=MPP PE=4 SV=1	W7U357_9STRA	MPP	52 kDa	44	0.26	0.0001	15.74	15.79	15.74	15.72	15.99	15.97	16.05	16.03	-0.0095	0.0375	-0.0174	-0.033	0.2387	0.2169	0.2992	0.2866
116	Proline dehydrogenase OS=Nannochloropsis gaditana GN=POX PE=4 SV=1	W7TKB9_9STRA	POX	67 kDa	24	0.41	0.0001	16.38	16.44	16.63	16.5	16.85	16.8	16.96	17.02	-0.1114	-0.0489	0.1392	0.0091	0.3507	0.2979	0.4643	0.5317
117	Uncharacterized protein OS=Nannochloropsis gaditana GN=Naga_100015g58 PE=4 SV=1	W7TND8_9STRA	Naga_100015g58	26 kDa	14	0.63	0.0001	15.24	15.38	15.52	15.72	15.99	15.88	16.29	16.31	-0.2637	-0.1178	0.0337	0.2314	0.5015	0.4051	0.7919	0.8163
118	Thioredoxin OS=Nannochloropsis gaditana GN=Naga_100013g39 PE=3 SV=1	W7U415_9STRA	Naga_100013g39	12 kDa	19	0.43	0.0001	17.21	17.31	17.13	17.19	17.83	17.61	17.63	17.51	-0.0051	0.0993	-0.0752	-0.0231	0.6211	0.4044	0.4185	0.3096
119	NADH dehydrogenase OS=Nannochloropsis gaditana (strain CCMP526) GN=NDH PE=4 SV=1	K8Z4M4_NANGC (+1)	NDH	64 kDa	12	0.54	0.0001	16.03	16.16	16.22	16.12	16.54	16.72	16.69	16.75	-0.1101	0.0279	0.0828	-0.0147	0.3933	0.5761	0.5465	0.6044
120	50S ribosomal protein L14, chloroplastic OS=Nannochloropsis gaditana GN=rpl14 PE=3 SV=1	K9ZWG5_9STRA	rpl14	14 kDa	19	-0.72	0.0001	16.43	16.38	16.48	16.41	15.63	15.81	15.59	15.86	0.0016	-0.0393	0.052	-0.0072	-0.8078	-0.6371	-0.8352	-0.5654
121	1-deoxy-d-xylulose 5-phosphate reductoisomerase OS=Nannochloropsis gaditana GN=DXR PE=4 SV=1	W7TAW3_9STRA	DXR	14 kDa	5	-0.63	0.0001	16.31	16.37	16.09	16.22	15.45	15.71	15.58	15.71	0.0595	0.1177	-0.1621	-0.0316	-0.8005	-0.5502	-0.6567	-0.5382
122	Uncharacterized protein OS=Nannochloropsis gaditana GN=Naga_100358g2 PE=4 SV=1	W7TIV1_9STRA	Naga_100358g2	172 kDa	16	0.64	0.0001	14.76	15.2	15.12	15.08	15.52	15.64	15.78	16.02	-0.3002	0.1258	0.0481	0.0169	0.4518	0.5881	0.7114	0.9436
123	Mpv17/PMP22 OS=Nannochloropsis gaditana GN=Naga_100002g3 PE=3 SV=1	W7TZ10_9STRA	Naga_100002g3	27 kDa	35	-0.38	0.0001	17.45	17.07	17.2	17.17	16.92	16.73	16.86	16.76	0.2395	-0.1365	0.0014	-0.0297	-0.2838	-0.4768	-0.3496	-0.4456
124	50S ribosomal protein L18, chloroplastic OS=Nannochloropsis gaditana GN=rpl18 PE=3 SV=1	K9ZX62_9STRA	rpl18	12 kDa	20	-0.8	0.0001	17.21	17.04	17.02	17.03	16.28	16.29	16.26	16.17	0.1458	-0.0224	-0.0473	-0.0351	-0.7762	-0.7731	-0.8041	-0.9129
125	Chaperonin OS=Nannochloropsis gaditana GN=Naga_100122g10 PE=3 SV=1	W7TFU2_9STRA	Naga_100122g10	65 kDa	114	-0.31	0.0001	14.78	14.85	14.87	14.87	14.58	14.66	14.44	14.5	-0.0641	0.0031	0.0316	0.0292	-0.275	-0.1968	-0.4074	-0.356
126	Uncharacterized protein OS=Nannochloropsis gaditana GN=Naga_100005g121 PE=4 SV=1	W7TYL2_9STRA	Naga_100005g121	51 kDa	18	0.64	0.0001	15.43	15.48	15.62	15.58	16.31	16.13	16.2	16.09	-0.1096	-0.048	0.0819	0.0419	0.7701	0.5963	0.6693	0.5639
127	Phosphoribulokinase OS=Nannochloropsis gaditana GN=PRK PE=3 SV=1	W7TMN7_9STRA	PRK	48 kDa	61	-0.48	0.0001	17.83	17.85	17.59	17.69	17.34	17.2	17.28	17.15	0.0967	0.1313	-0.1328	-0.0195	-0.3815	-0.5213	-0.4447	-0.5818
128	50S ribosomal protein L19 OS=Nannochloropsis gaditana GN=rpl19 PE=4 SV=1	K9ZV73_9STRA	rpl19	14 kDa	22	-0.81	0.0001	17.55	17.51	17.45	17.44	16.54	16.78	16.7	16.65	0.0592	0.0229	-0.033	-0.041	-0.9259	-0.696	-0.7536	-0.8248
129	S-adenosylmethionine synthase OS=Nannochloropsis gaditana GN=Naga_100084g4 PE=3 SV=1	W7TSQ4_9STRA	Naga_100084g4	43 kDa	101	-0.34	0.0001	16.42	16.49	16.15	16.35	15.97	16.1	15.99	15.94	0.0763	0.148	-0.2022	0.0054	-0.3798	-0.2434	-0.3484	-0.4078
130	Fructose-bisphosphate aldolase OS=Nannochloropsis gaditana GN=FBA1 PE=3 SV=1	W7TFC8_9STRA	FBA1	44 kDa	177	-0.4	0.0001	16.45	16.63	16.46	16.49	16.1	16.11	16.08	16.13	-0.0642	0.1263	-0.0434	-0.005	-0.4098	-0.3995	-0.4291	-0.3942
131	Pyridoxamine 5-phosphate oxidase-related fmn-binding protein OS=Nannochloropsis gaditana GN=Naga_100120g6 PE=4 SV=1	W7TPU5_9STRA	Naga_100120g6	40 kDa	19	-0.45	0.0001	15.43	15.59	15.49	15.41	15.01	15.03	15.02	15.08	-0.0503	0.1094	0.0103	-0.0632	-0.4938	-0.4662	-0.4762	-0.4149
132	Uncharacterized protein OS=Nannochloropsis gaditana (strain CCMP526) GN=NGA_0488300 PE=4 SV=1	K8ZAQ9_NANGC (+1)	NGA_0488300	25 kDa	6	0.7	0.0001	16.01	15.94	16.09	15.84	16.67	16.67	16.67	16.68	0.0434	-0.0319	0.1125	-0.1312	0.707	0.7053	0.7029	0.7152
133	Uncharacterized protein OS=Nannochloropsis gaditana GN=Naga_100177g17 PE=4 SV=1	W7U719_9STRA	Naga_100177g17	37 kDa	20	0.89	0.0001	15.51	16.39	15.83	15.54	16.61	17	16.48	16.81	-0.3138	0.5588	0.0023	-0.2808	0.7844	1.1537	0.6517	0.9641
134	Glycine dehydrogenase OS=Nannochloropsis gaditana (strain CCMP526) GN=NGATSA_3003100 PE=2 SV=1	I2CQP8_NANGC	NGATSA_3003100	111 kDa	63	-0.26	0.0001	16.38	16.48	16.15	16.26	15.96	16.01	16.15	16.07	0.0595	0.1667	-0.1649	-0.0518	-0.3513	-0.3088	-0.166	-0.2516
135	30S ribosomal protein S5, chloroplastic OS=Nannochloropsis gaditana GN=rps5 PE=3 SV=1	K9ZVA7_9STRA	rps5	19 kDa	31	-0.55	0.0001	16.93	17.15	17.09	17.18	16.45	16.47	16.65	16.62	-0.1572	0.0671	-0.0005	0.0903	-0.661	-0.6259	-0.4523	-0.5014
136	Mpv17-like protein OS=Nannochloropsis gaditana GN=Naga_100036g4 PE=3 SV=1	W7U673_9STRA	Naga_100036g4	31 kDa	63	-0.44	0.0001	16.66	16.44	16.41	16.46	16.11	15.89	16.14	15.96	0.1842	-0.0294	-0.0714	-0.0022	-0.3506	-0.5748	-0.3298	-0.5052
137	Light-dependent NADPH:protochlorophyllide oxidoreductase OS=Nannochloropsis gaditana (strain CCMP526) GN=POR PE=4 SV=1	K8ZAF7_NANGC (+1)	POR	47 kDa	36	-0.54	0.0001	16.45	16.24	16.33	16.25	15.9	15.75	15.71	15.7	0.1476	-0.0725	0.0172	-0.0516	-0.4257	-0.5524	-0.5897	-0.6301
138	Uncharacterized protein OS=Nannochloropsis gaditana (strain CCMP526) GN=NGA_0714000 PE=4 SV=1	K8Z918_NANGC (+1)	NGA_0714000	37 kDa	6	0.61	0.0001	16.29	16.59	16.47	16.52	17.05	16.97	17.13	17.17	-0.1824	0.1182	-0.0059	0.0461	0.5694	0.4991	0.6498	0.7006
139	Ferredoxin nitrite reductase (Fragment) OS=Nannochloropsis gaditana (strain CCMP526) GN=NIRA PE=4 SV=1	K8YST4_NANGC	NIRA	40 kDa	18	-1.13	0.0001	16.29	16.78	16.58	16.49	15.53	15.57	15.3	15.34	-0.2544	0.284	0.068	0.0053	-0.9909	-0.9825	-1.2356	-1.2416
140	Cathepsin a OS=Nannochloropsis gaditana GN=Naga_100005g13 PE=3 SV=1	W7TYE0_9STRA	Naga_100005g13	60 kDa	11	0.87	0.0001	15.7	15.62	15.73	15.68	16.67	16.38	16.61	16.57	0.0137	-0.0663	0.0468	-0.0106	1.0109	0.6964	0.9082	0.9189
141	Putative mitochondrial aspartate-glutamate transporter OS=Nannochloropsis gaditana GN=Naga_100099g22 PE=3 SV=1	W7TVG3_9STRA	Naga_100099g22	32 kDa	27	0.65	0.0001	14.94	14.97	15.15	15.11	15.78	15.58	15.84	15.61	-0.1112	-0.0663	0.1131	0.0569	0.7363	0.5325	0.7796	0.5581
142	Transferase caf17 mitochondrial-like protein OS=Nannochloropsis gaditana GN=Naga_100008g73 PE=4 SV=1	W7TPM8_9STRA	Naga_100008g73	51 kDa	9	0.56	0.0001	16.22	16.36	16.35	16.25	16.61	16.97	16.98	16.87	-0.0995	0.0539	0.0581	-0.0619	0.3079	0.6692	0.6744	0.5661
143	Uncharacterized protein OS=Nannochloropsis gaditana GN=Naga_101141g1 PE=4 SV=1	W7T9L0_9STRA	Naga_101141g1	87 kDa	29	0.65	0.0001	15.51	15.5	15.65	15.75	16.27	16	16.25	16.54	-0.093	-0.1081	0.0226	0.1469	0.6608	0.3887	0.6364	0.9392
144	Aminopeptidase puromycin sensitive OS=Nannochloropsis gaditana GN=Naga_100070g24 PE=4 SV=1	W7T4K9_9STRA	Naga_100070g24	100 kDa	50	0.22	0.0001	15.99	16.04	16.02	16.02	16.27	16.23	16.27	16.2	-0.0385	0.0224	0.0063	-0.0046	0.2414	0.2104	0.2479	0.1751
145	Phospho-2-dehydro-3-deoxyheptonate aldolase OS=Nannochloropsis gaditana GN=Naga_100004g146 PE=3 SV=1	W7TQE4_9STRA	Naga_100004g146	34 kDa	35	-0.43	0.0001	16.87	16.75	16.78	16.78	16.33	16.49	16.31	16.33	0.0835	-0.0462	-0.0078	-0.0036	-0.4578	-0.2928	-0.4747	-0.4529
146	Argininosuccinate synthetase OS=Nannochloropsis gaditana (strain CCMP526) GN=ARGG PE=3 SV=1	K8ZAF5_NANGC (+1)	ARGG	47 kDa	54	0.33	0.0001	16.62	16.62	16.59	16.56	16.95	16.88	16.99	16.91	0.023	0.0225	-0.0048	-0.0322	0.3349	0.2766	0.3866	0.3065
147	30S ribosomal protein S14, chloroplastic OS=Nannochloropsis gaditana GN=rs14 PE=3 SV=1	K9ZXN7_9STRA	rs14	12 kDa	7	-0.74	0.0001	17.33	17.75	17.71	17.57	16.75	16.87	16.98	16.91	-0.2771	0.1475	0.1025	-0.0336	-0.8687	-0.734	-0.6443	-0.7252
148	Soluble pyridine nucleotide transhydrogenase OS=Nannochloropsis gaditana GN=Naga_100100g18 PE=4 SV=1	W7TTE2_9STRA	Naga_100100g18	62 kDa	10	0.44	0.0001	15.39	15.32	15.48	15.49	15.87	15.7	16	15.89	-0.0417	-0.0977	0.0601	0.0721	0.4457	0.2762	0.5757	0.4724
149	Uncharacterized protein OS=Nannochloropsis gaditana GN=Naga_100288g2 PE=4 SV=1	W7U528_9STRA	Naga_100288g2	24 kDa	9	1.86	0.0001	16.01	16.27	16.63	16.15	18.66	18.71	18.51	16.67	-0.2769	-0.0125	0.3511	-0.1408	2.3382	2.3657	2.1779	0.4179
150	Lipolytic protein g-d-s-l family OS=Nannochloropsis gaditana (strain CCMP526) GN=NGA_0427500 PE=4 SV=1	K8Z9N6_NANGC	NGA_0427500	23 kDa	19	0.62	0.0001	16.98	16.66	16.9	16.99	17.67	17.18	17.53	17.8	0.0795	-0.2341	0.0136	0.1075	0.7717	0.287	0.6515	0.9236
151	Light-harvesting protein OS=Nannochloropsis gaditana GN=LHC10 PE=4 SV=1	W7TX20_9STRA	LHC10	22 kDa	24	-0.66	0.0001	17.4	17.19	17.26	17.14	16.59	16.59	16.57	16.5	0.1772	-0.0541	0.0318	-0.0986	-0.6432	-0.6389	-0.6492	-0.731
152	Major facilitator superfamily domain, general substrate transporter OS=Nannochloropsis gaditana GN=Naga_100324g2 PE=4 SV=1	W7TW79_9STRA	Naga_100324g2	68 kDa	14	-0.47	0.0001	17.83	17.64	17.66	17.78	17.26	17.44	17.32	16.93	0.1032	-0.0967	-0.0664	0.0518	-0.4657	-0.284	-0.4019	-0.7726
153	CRAL-TRIO domain protein OS=Nannochloropsis gaditana GN=Naga_100006g52 PE=4 SV=1	W7U1D8_9STRA	Naga_100006g52	33 kDa	8	0.4	0.0001	15.99	15.9	16.11	15.97	16.45	16.41	16.52	16.17	-0.0078	-0.094	0.1118	-0.0244	0.4558	0.4095	0.5194	0.176
154	Pyruvate kinase OS=Nannochloropsis gaditana GN=PYK PE=3 SV=1	W7TRP2_9STRA	PYK	61 kDa	53	-0.31	0.0001	16.4	16.32	16.26	16.23	16.02	16.07	15.99	15.95	0.1151	0.0265	-0.0372	-0.0543	-0.2786	-0.2385	-0.3099	-0.3511
155	Nuclear cap-binding protein subunit 1 OS=Nannochloropsis gaditana GN=Naga_100100g3 PE=4 SV=1	W7UBY3_9STRA	Naga_100100g3	105 kDa	11	0.39	0.0001	15.08	14.96	15.11	15.05	15.48	15.4	15.42	15.44	0.0237	-0.094	0.0502	0.0025	0.4344	0.3548	0.3661	0.3893
156	30S ribosomal protein S3, chloroplastic OS=Nannochloropsis gaditana GN=rps3 PE=3 SV=1	A0A023PKX5_9STRA	rps3	26 kDa	31	-0.63	0.0001	17.85	17.94	17.91	17.87	17.24	17.29	17.24	17.27	-0.0494	0.0491	0.0221	-0.0219	-0.6482	-0.5928	-0.6336	-0.5932
157	Cellulase 2 OS=Nannochloropsis gaditana GN=Naga_100907g1 PE=3 SV=1	W7TIL2_9STRA	Naga_100907g1	21 kDa	5	0.58	0.0001	16.57	16.77	16.44	16.42	17.17	17.09	17.22	17.02	0.0239	0.2184	-0.1071	-0.1338	0.6154	0.5326	0.6709	0.4756
158	Cytokinin riboside 5'-monophosphate phosphoribohydrolase LOG OS=Nannochloropsis gaditana GN=Naga_100192g5 PE=4 SV=1	W7U367_9STRA	Naga_100192g5	39 kDa	34	0.46	0.0001	16.7	16.52	16.44	16.37	17.05	16.95	17.05	16.84	0.1937	0.0271	-0.0578	-0.1337	0.5469	0.4624	0.5427	0.3504
159	Ribosomal protein l32 OS=Nannochloropsis gaditana GN=Naga_100052g38 PE=4 SV=1	W7T4V3_9STRA	Naga_100052g38	16 kDa	34	-0.33	0.0001	16.62	16.63	16.6	16.7	16.2	16.39	16.4	16.25	-0.0178	-0.0088	-0.0358	0.0636	-0.4338	-0.2488	-0.2523	-0.387
160	C2 domain protein (Fragment) OS=Nannochloropsis gaditana (strain CCMP526) GN=NGATSA_3004200 PE=2 SV=1	I2CNZ3_NANGC	NGATSA_3004200	89 kDa	40	0.35	0.0001	15.81	15.65	15.9	15.89	16.17	16.05	16.26	16.19	-0.022	-0.1502	0.0803	0.0624	0.3495	0.2379	0.4332	0.383
161	50S ribosomal protein L22, chloroplastic OS=Nannochloropsis gaditana GN=rpl22 PE=3 SV=1	K9ZWE8_9STRA	rpl22	18 kDa	23	-0.53	0.0001	16.05	15.84	15.99	16.08	15.53	15.48	15.46	15.25	0.0621	-0.1324	0.0078	0.0947	-0.4597	-0.5023	-0.5231	-0.7361
162	NADH dehydrogenase subunit 11 OS=Nannochloropsis gaditana GN=nad11 PE=4 SV=1	T1R8C8_9STRA	nad11	58 kDa	35	0.27	0.0001	16	16.11	16.14	16.12	16.31	16.31	16.38	16.42	-0.098	0.009	0.0457	0.0273	0.2182	0.2128	0.2787	0.3215
163	Phosphoribosylaminoimidazole carboxylase OS=Nannochloropsis gaditana GN=Naga_100033g33 PE=3 SV=1	W7UCS5_9STRA	Naga_100033g33	72 kDa	39	0.28	0.0001	16.77	16.83	16.77	16.83	17	17.06	17.17	17.1	-0.0324	0.0228	-0.0288	0.0152	0.2056	0.2546	0.3582	0.2981
164	Choline dehydrogenase OS=Nannochloropsis gaditana GN=Naga_100105g4 PE=4 SV=1	W7TUP3_9STRA	Naga_100105g4	80 kDa	18	0.49	0.0001	15.97	16	15.96	15.97	16.6	16.43	16.54	16.33	0.0009	0.0318	-0.0215	-0.0036	0.6035	0.4458	0.5506	0.3528
165	Dienoyl-reductase OS=Nannochloropsis gaditana GN=Naga_100084g20 PE=4 SV=1	W7U1Q4_9STRA	Naga_100084g20	77 kDa	11	0.41	0.0001	16.28	16.18	16.41	16.26	16.67	16.72	16.7	16.7	-0.004	-0.1076	0.129	-0.0333	0.3728	0.441	0.411	0.4159
166	Nucleolar protein expressed OS=Nannochloropsis gaditana GN=Naga_100186g2 PE=4 SV=1	W7TXA7_9STRA	Naga_100186g2	58 kDa	18	0.45	0.0001	15.49	15.49	15.79	15.77	16.09	15.99	16.2	16.11	-0.16	-0.1705	0.1337	0.1194	0.4309	0.3412	0.5324	0.4527
167	Peroxiredoxin q OS=Nannochloropsis gaditana (strain CCMP526) GN=NGA_0556800 PE=4 SV=1	K8YP84_NANGC (+1)	NGA_0556800	20 kDa	16	0.44	0.0001	16.25	16.42	16.29	16.19	16.87	16.61	16.76	16.69	-0.0451	0.1233	0.0079	-0.0906	0.5863	0.328	0.4726	0.4015
168	Phosphoribosylaminoimidazole-succinocarboxamide synthase OS=Nannochloropsis gaditana GN=Naga_101421g1 PE=4 SV=1	W7T5B3_9STRA	Naga_101421g1	16 kDa	13	0.49	0.0001	16.13	16.19	16.14	16.2	16.69	16.77	16.66	16.54	-0.0378	0.0256	-0.0283	0.0284	0.5271	0.5984	0.4874	0.3804
169	Uncharacterized protein OS=Nannochloropsis gaditana GN=Naga_100100g12 PE=4 SV=1	W7UBY6_9STRA	Naga_100100g12	26 kDa	30	0.51	0.0001	16.35	16.5	16.91	17	17.06	16.97	17.59	17.84	-0.3801	-0.2361	0.1647	0.2714	0.3219	0.2175	0.8313	1.0631
170	Peptidyl-prolyl cis-trans isomerase OS=Nannochloropsis gaditana GN=Naga_100005g16 PE=3 SV=1	W7TPH9_9STRA	Naga_100005g16	21 kDa	25	-0.51	0.0001	16.46	16.68	16.32	16.49	15.88	16.04	15.96	16.06	-0.0291	0.1881	-0.1748	0.0174	-0.6186	-0.4422	-0.5234	-0.4211
171	Large subunit ribosomal protein L27Ae (Fragment) OS=Nannochloropsis gaditana (strain CCMP526) GN=RP-L27AE PE=3 SV=1	K8YW86_NANGC (+1)	RP-L27AE	16 kDa	42	-0.4	0.0001	16.65	16.45	16.46	16.53	16	16.25	16.25	15.94	0.1334	-0.0718	-0.0566	0.0114	-0.5158	-0.2751	-0.264	-0.5801
172	Light-harvesting protein OS=Nannochloropsis gaditana GN=LHCP34 PE=4 SV=1	W7T6P5_9STRA	LHCP34	29 kDa	34	-0.46	0.0001	16.74	16.62	16.7	16.69	16.36	16.23	16.11	16.26	0.0494	-0.0651	0.0167	0.0228	-0.3353	-0.4488	-0.5767	-0.4173
173	Dead-box atp-dependent rna helicase OS=Nannochloropsis gaditana GN=Naga_100038g3 PE=3 SV=1	W7U315_9STRA	Naga_100038g3	53 kDa	38	0.25	0.0001	15.4	15.47	15.59	15.64	15.76	15.74	15.85	15.78	-0.1305	-0.0557	0.0577	0.1161	0.2272	0.2047	0.3218	0.2554
174	Uncharacterized protein OS=Nannochloropsis gaditana (strain CCMP526) GN=NGA_0361402 PE=4 SV=1	K8YRK7_NANGC (+1)	NGA_0361402	21 kDa	34	-0.22	0.0001	16.88	16.73	16.68	16.65	16.61	16.53	16.47	16.38	0.1588	0.0065	-0.0395	-0.0769	-0.122	-0.2053	-0.2512	-0.3417
175	Sugar nucleotide epimerase OS=Nannochloropsis gaditana GN=Naga_100154g10 PE=4 SV=1	W7THY6_9STRA	Naga_100154g10	26 kDa	26	0.61	0.0001	15.92	15.94	16.25	16.41	16.88	16.36	16.89	17.07	-0.2346	-0.2014	0.0894	0.252	0.707	0.1931	0.7086	0.8925
176	Methionine synthase OS=Nannochloropsis gaditana GN=MTR PE=4 SV=1	W7TWI4_9STRA	MTR	142 kDa	46	-0.27	0.0001	15.98	16.17	16.16	16.13	15.8	15.85	15.87	15.85	-0.1366	0.0497	0.0467	0.011	-0.3126	-0.2769	-0.247	-0.2694
177	H-or na-translocating f-v-type and a-type atpase (F-atpase) superfamily OS=Nannochloropsis gaditana GN=Naga_100011g39 PE=4 SV=1	W7TG62_9STRA	Naga_100011g39	29 kDa	22	0.3	0.0001	15.59	15.53	15.71	15.6	15.94	15.84	15.99	15.85	-0.0177	-0.0845	0.1028	-0.0156	0.3224	0.2318	0.3753	0.2339
178	Cystathionine gamma-lyase OS=Nannochloropsis gaditana GN=Naga_100002g102 PE=3 SV=1	W7TYW0_9STRA	Naga_100002g102	46 kDa	15	0.47	0.0001	15.85	15.87	15.91	15.92	16.34	16.37	16.39	16.33	-0.0465	-0.0159	0.0252	0.0333	0.4387	0.4721	0.4843	0.4394
179	40S ribosomal protein S6 OS=Nannochloropsis gaditana GN=Naga_100159g7 PE=3 SV=1	W7TEA2_9STRA	Naga_100159g7	28 kDa	38	-0.39	0.0001	16.28	16.62	16.65	16.67	16	16.23	16.29	16.15	-0.2802	0.0424	0.0679	0.0862	-0.5745	-0.35	-0.2932	-0.4319
180	Large subunit ribosomal protein L13e OS=Nannochloropsis gaditana (strain CCMP526) GN=RP-L13E PE=4 SV=1	K8Z7Z7_NANGC	RP-L13E	23 kDa	48	-0.21	0.0001	17.3	17.24	17.2	17.26	17.06	17.08	17.04	16.97	0.0491	-0.001	-0.0495	0.0056	-0.1987	-0.177	-0.2117	-0.2998
181	Uncharacterized protein OS=Nannochloropsis gaditana (strain CCMP526) GN=NGA_0514700 PE=4 SV=1	K8Z3L3_NANGC (+1)	NGA_0514700	27 kDa	25	0.32	0.0001	16.44	16.56	16.42	16.44	16.83	16.65	16.87	16.78	-0.0402	0.0879	-0.0504	-0.0239	0.3543	0.1838	0.404	0.3055
182	Asparagine synthetase OS=Nannochloropsis gaditana GN=Naga_100057g17 PE=4 SV=1	W7TS38_9STRA	Naga_100057g17	66 kDa	43	0.26	0.0001	16.19	16.22	16.09	16.13	16.43	16.44	16.41	16.39	0.0368	0.0657	-0.0688	-0.0189	0.2785	0.2864	0.2549	0.2301
183	Nitrate reductase OS=Nannochloropsis gaditana GN=Naga_100699g1 PE=4 SV=1	W7TAR6_9STRA	Naga_100699g1	70 kDa	12	-1.08	0.0001	16.41	16.31	16.46	16.57	15.52	15.44	15.21	15.32	-0.0286	-0.1342	0.0182	0.1303	-0.9385	-0.9901	-1.2109	-1.0678
184	Ribosomal protein l19 OS=Nannochloropsis gaditana GN=Naga_100379g2 PE=3 SV=1	W7U2F1_9STRA	Naga_100379g2	26 kDa	37	-0.41	0.0001	16.73	16.63	16.71	16.73	16.32	16.4	16.35	16.04	0.038	-0.0706	0.0126	0.0381	-0.3775	-0.3128	-0.3749	-0.6518
185	Uncharacterized protein OS=Nannochloropsis gaditana GN=Naga_100099g23 PE=4 SV=1	W7TVG2_9STRA	Naga_100099g23	40 kDa	56	-0.34	0.0001	17.39	17.19	17.18	17.17	17.02	16.88	16.82	16.8	0.1671	-0.0329	-0.0426	-0.0489	-0.2105	-0.3335	-0.4088	-0.4341
186	Light-harvesting protein OS=Nannochloropsis gaditana GN=Naga_100056g15 PE=4 SV=1	W7TJ16_9STRA	Naga_100056g15	32 kDa	29	-0.29	0.0001	17.48	17.3	17.36	17.27	17.01	17.13	17.06	17.06	0.1375	-0.0469	0.0075	-0.0849	-0.34	-0.218	-0.3002	-0.2901
187	Urease accessory protein ureg OS=Nannochloropsis gaditana GN=Naga_100020g64 PE=3 SV=1	W7TAZ7_9STRA	Naga_100020g64	38 kDa	17	0.39	0.0001	14.79	14.71	14.82	14.73	15.15	15.01	15.32	15.12	0.0293	-0.0525	0.0528	-0.0287	0.3914	0.2453	0.5563	0.3636
188	Delta 5 fatty acid desaturase OS=Nannochloropsis gaditana (strain CCMP526) GN=NGA_0209900 PE=4 SV=1	K8YSX2_NANGC (+1)	NGA_0209900	54 kDa	5	-0.95	0.0001	17.2	17.16	16.88	17.03	16.27	16.25	16.08	15.84	0.1439	0.0917	-0.1851	-0.0291	-0.7888	-0.7879	-0.9874	-1.2242
189	Ankyrin OS=Nannochloropsis gaditana GN=Naga_100012g14 PE=4 SV=1	W7T4W4_9STRA	Naga_100012g14	92 kDa	32	-0.27	0.0001	16.52	16.44	16.62	16.61	16.34	16.25	16.3	16.17	-0.0353	-0.111	0.0672	0.0575	-0.2131	-0.2888	-0.2562	-0.3679
190	Uncharacterized protein OS=Nannochloropsis gaditana (strain CCMP526) GN=NGA_0624300 PE=4 SV=1	K8Z4V9_NANGC	NGA_0624300	36 kDa	20	-0.92	0.0001	15.41	15.13	15.04	15	14.34	14.29	14.1	14.02	0.3071	0.0022	-0.0845	-0.1295	-0.781	-0.8256	-1.0326	-1.0887
191	50S ribosomal protein L11, chloroplastic OS=Nannochloropsis gaditana GN=rpl11 PE=3 SV=1	K9ZX36_9STRA	rpl11	15 kDa	22	-0.58	0.0001	17	16.84	16.81	16.88	16.31	16.25	16.29	16.34	0.1093	-0.0241	-0.0617	0.0128	-0.5564	-0.6246	-0.5766	-0.5209
192	Alcohol dehydrogenase OS=Nannochloropsis gaditana GN=Naga_100049g35 PE=3 SV=1	W7TDK1_9STRA	Naga_100049g35	37 kDa	17	0.53	0.0001	16.43	16.54	16.36	16.26	16.8	17.08	16.97	16.88	0.0247	0.1388	-0.0352	-0.1317	0.3911	0.6627	0.5769	0.477
193	Citrate synthase OS=Nannochloropsis gaditana GN=Naga_100015g11 PE=3 SV=1	W7U4C6_9STRA	Naga_100015g11	52 kDa	75	0.31	0.0001	16.95	17.02	16.82	16.82	17.36	17.17	17.27	17.08	0.0464	0.1223	-0.0806	-0.0861	0.4546	0.2642	0.3695	0.1817
194	Cluster of H+-transporting ATPase OS=Nannochloropsis gaditana (strain CCMP526) GN=NGA_0635410 PE=3 SV=1 (K8YQ29_NANGC)	K8YQ29_NANGC [5]	NGA_0635410	152 kDa	81	-0.87	0.0001	15.9	15.78	15.85	15.79	14.95	15.06	14.91	14.86	0.0802	-0.0687	0.0359	-0.0221	-0.6855	-0.6391	-0.7434	-0.7963
195	Homoaconitate hydratase family protein OS=Nannochloropsis gaditana GN=Naga_100048g8 PE=4 SV=1	W7TZ20_9STRA	Naga_100048g8	56 kDa	39	-0.3	0.0001	16.63	16.81	16.75	16.75	16.39	16.48	16.44	16.44	-0.1079	0.0723	0.0191	0.0187	-0.3499	-0.2556	-0.2993	-0.2865
196	Uncharacterized protein OS=Nannochloropsis gaditana GN=Naga_100244g5 PE=4 SV=1	W7TNV1_9STRA	Naga_100244g5	38 kDa	46	-0.39	0.0001	16.88	16.17	16.77	16.39	16.15	16.24	15.99	16.03	0.3627	-0.3502	0.2523	-0.129	-0.363	-0.2692	-0.5193	-0.4838
197	Carbonate dehydratase OS=Nannochloropsis gaditana GN=Naga_100153g3 PE=4 SV=1	W7TN77_9STRA	Naga_100153g3	37 kDa	14	0.69	0.0001	15.71	15.63	15.55	15.41	16.45	16.22	16.21	16.2	0.1343	0.0621	-0.0171	-0.1582	0.8841	0.6447	0.6342	0.636
198	50S ribosomal protein L16, chloroplastic OS=Nannochloropsis gaditana GN=rpl16 PE=3 SV=1	K9ZWF3_9STRA	rpl16	16 kDa	14	-0.9	0.0001	17.76	17.63	17.72	17.65	16.73	16.87	16.81	16.76	0.0681	-0.0603	0.0331	-0.0365	-0.9703	-0.842	-0.8762	-0.9278
199	3-oxoacyl-ACP reductase (Fragment) OS=Nannochloropsis gaditana (strain CCMP526) GN=NGATSA_2002200 PE=2 SV=1	I2CPJ2_NANGC (+2)	NGATSA_2002200	30 kDa	9	0.41	0.0001	16.18	16.02	15.94	15.96	16.56	16.38	16.47	16.35	0.154	-0.0039	-0.0862	-0.0727	0.5267	0.3491	0.4453	0.3215
200	Large subunit ribosomal protein L5e OS=Nannochloropsis gaditana (strain CCMP526) GN=RP-L5E PE=3 SV=1	K8Z8X1_NANGC (+1)	RP-L5E	36 kDa	55	-0.21	0.0001	16.78	16.63	16.65	16.63	16.54	16.48	16.48	16.29	0.1042	-0.0307	-0.0178	-0.0424	-0.1395	-0.1849	-0.19	-0.3863
201	Uncharacterized protein (Fragment) OS=Nannochloropsis gaditana GN=Naga_103074g1 PE=4 SV=1	W7SYJ3_9STRA	Naga_103074g1	13 kDa	6	-0.88	0.0001	19.98	19.61	19.47	19.49	19.02	18.81	18.72	18.42	0.377	-0.0027	-0.1388	-0.114	-0.6213	-0.7888	-0.898	-1.1798
202	30S ribosomal protein S9, chloroplastic OS=Nannochloropsis gaditana GN=rps9 PE=3 SV=1	A0A023PLK7_9STRA	rps9	15 kDa	17	-0.82	0.0001	16.93	17.03	17.14	16.98	16.21	16.25	16.19	16.21	-0.0811	0.0044	0.1318	-0.0368	-0.8245	-0.7743	-0.826	-0.7966
203	1-deoxy-D-xylulose-5-phosphate synthase OS=Nannochloropsis gaditana (strain CCMP526) GN=DXS PE=3 SV=1	K8Z520_NANGC	DXS	90 kDa	19	-0.54	0.0001	16.82	16.8	16.68	16.7	16.23	16.19	16.19	16.2	0.0801	0.0575	-0.0743	-0.0473	-0.5093	-0.5492	-0.5404	-0.5537
204	FAS1 domain protein OS=Nannochloropsis gaditana GN=Naga_100442g3 PE=4 SV=1	W7TBQ5_9STRA	Naga_100442g3	27 kDa	36	-0.47	0.0001	16.59	16.99	16.77	16.89	16.37	16.3	16.3	16.4	-0.2427	0.1861	-0.0475	0.0799	-0.4467	-0.5169	-0.5186	-0.4099
205	ATP synthase CF0 B chain subunit I OS=Nannochloropsis gaditana GN=atpF PE=3 SV=1	T1RGX4_9STRA	atpF	18 kDa	45	-0.34	0.0001	16.3	16.22	16.35	16.38	15.94	15.81	16.11	16.02	-0.0131	-0.0889	0.0444	0.0763	-0.3654	-0.4996	-0.2029	-0.2925
206	Cytochrome c oxidase subunit 2 OS=Nannochloropsis gaditana GN=cox2 PE=3 SV=1	K9ZVJ2_9STRA	cox2	35 kDa	34	0.35	0.0001	16.93	16.89	16.9	16.89	17.21	17.2	17.34	17.22	0.0194	-0.0164	-0.0043	-0.0131	0.3037	0.2977	0.4424	0.3187
207	Putative xaa-pro aminopeptidase p OS=Nannochloropsis gaditana GN=Naga_100013g76 PE=3 SV=1	W7UCM2_9STRA	Naga_100013g76	84 kDa	27	-0.33	0.0001	15.86	15.96	15.87	15.93	15.56	15.61	15.56	15.6	-0.0471	0.0537	-0.046	0.0211	-0.3581	-0.3076	-0.3462	-0.3023
208	Methylenetetrahydrofolate reductase OS=Nannochloropsis gaditana GN=Naga_100020g75 PE=4 SV=1	W7TUD6_9STRA	Naga_100020g75	43 kDa	14	-0.41	0.0001	16.8	16.6	16.5	16.58	16.27	16.29	16.07	16.15	0.2019	-0.0061	-0.1089	-0.038	-0.332	-0.3126	-0.521	-0.4588
209	Endoribonuclease l-psp OS=Nannochloropsis gaditana GN=Naga_100077g4 PE=4 SV=1	W7TST7_9STRA	Naga_100077g4	16 kDa	16	0.53	0.0001	16.08	16.28	16.02	16	16.71	16.73	16.54	16.54	-0.0133	0.1945	-0.0792	-0.0855	0.6122	0.6208	0.4337	0.4417
210	Arachidonate 5-lipoxygenase OS=Nannochloropsis gaditana (strain CCMP526) GN=ALOX5 PE=4 SV=1	K8Z8I5_NANGC	ALOX5	60 kDa	21	0.71	0.0001	15.64	15.74	16.25	16.34	16.59	16.38	16.97	17.47	-0.3711	-0.2935	0.1996	0.302	0.5496	0.3499	0.9091	1.3985
211	Serine hydroxymethyltransferase OS=Nannochloropsis gaditana GN=SHMT2 PE=3 SV=1	W7U077_9STRA (+1)	SHMT2	51 kDa	89	0.22	0.0001	16.51	16.62	16.51	16.57	16.86	16.68	16.78	16.81	-0.0447	0.0595	-0.0515	0.0193	0.3065	0.1165	0.2121	0.2444
212	Homodimeric type OS=Nannochloropsis gaditana GN=Naga_100067g8 PE=4 SV=1	W7T5Y0_9STRA	Naga_100067g8	45 kDa	12	0.37	0.0001	15.55	15.62	15.59	15.5	16.05	15.85	15.89	15.96	-0.0205	0.0531	0.0214	-0.0658	0.4812	0.3011	0.3209	0.398
213	Winged helix-turn-helix transcription repressor OS=Nannochloropsis gaditana GN=Naga_100236g4 PE=4 SV=1	W7THE3_9STRA	Naga_100236g4	58 kDa	23	0.22	0.0001	15.81	15.98	15.93	15.98	16.06	16.17	16.21	16.14	-0.1176	0.0521	0.0029	0.062	0.1385	0.2503	0.282	0.2049
214	Chaperonin 10 OS=Nannochloropsis gaditana (strain CCMP526) GN=NGA_0045802 PE=3 SV=1	K8Z8Q4_NANGC (+1)	NGA_0045802	11 kDa	18	0.44	0.0001	17.44	17.69	17.27	17.39	18.09	17.66	17.82	17.98	-0.021	0.2468	-0.1721	-0.0513	0.6454	0.22	0.3832	0.5481
215	Succinate fumarate mitochondrial transporter OS=Nannochloropsis gaditana GN=Naga_100025g13 PE=3 SV=1	W7U0T5_9STRA	Naga_100025g13	37 kDa	13	0.44	0.0001	15.74	15.87	15.94	15.85	16.28	16.3	16.29	16.34	-0.1235	0.005	0.0909	-0.0092	0.4339	0.426	0.4189	0.483
216	U2 small nuclear auxiliary small OS=Nannochloropsis gaditana GN=Naga_100078g8 PE=4 SV=1	W7TH55_9STRA	Naga_100078g8	42 kDa	9	0.66	0.0001	14.37	14.05	14.51	14.3	15	14.95	15.15	14.84	0.0544	-0.2786	0.1827	-0.0157	0.6799	0.6297	0.8151	0.5238
217	Fad-dependent oxidoreductase OS=Nannochloropsis gaditana GN=Naga_100039g19 PE=4 SV=1	W7TEZ3_9STRA	Naga_100039g19	59 kDa	12	0.67	0.0001	15.69	15.69	15.88	15.98	16.31	16.14	16.65	16.9	-0.1273	-0.129	0.0578	0.1644	0.5001	0.3243	0.8319	1.0726
218	40S ribosomal protein S3a OS=Nannochloropsis gaditana GN=Naga_100032g3 PE=3 SV=1	W7TXZ6_9STRA	Naga_100032g3	30 kDa	77	-0.24	0.0001	16.74	16.95	17	17.02	16.55	16.7	16.82	16.7	-0.2041	0.0132	0.0582	0.093	-0.3851	-0.2427	-0.109	-0.2398
219	Cluster of Argo-Piwi OS=Nannochloropsis gaditana GN=AGO1 PE=3 SV=1 (W7T785_9STRA)	W7T785_9STRA [2]	AGO1	95 kDa	19	0.43	0.0001	15.4	15.3	15.48	15.5	15.76	15.67	16	15.98	-0.0416	-0.1232	0.0515	0.0757	0.3353	0.2579	0.5782	0.5478
220	Hypersensitive-induced response protein OS=Nannochloropsis gaditana GN=Naga_100019g59 PE=4 SV=1	W7TM34_9STRA	Naga_100019g59	31 kDa	15	0.51	0.0001	15.63	15.31	15.46	15.31	15.88	16.01	15.98	15.83	0.2118	-0.1124	0.0356	-0.1152	0.4782	0.5853	0.5591	0.3978
221	Fad linked oxidase domain-containing protein OS=Nannochloropsis gaditana GN=Naga_100102g9 PE=4 SV=1	W7TR66_9STRA	Naga_100102g9	70 kDa	28	0.52	0.0001	15.8	15.85	16.05	16.04	16.45	16.13	16.55	16.86	-0.1583	-0.1063	0.0978	0.0937	0.5004	0.1633	0.6152	0.9072
222	Phosphoinositol transporter OS=Nannochloropsis gaditana GN=Naga_100023g42 PE=4 SV=1	W7T865_9STRA	Naga_100023g42	32 kDa	10	0.6	0.0001	16.1	16.25	16.18	16	16.94	16.72	16.7	16.66	-0.0548	0.1241	0.047	-0.1436	0.7901	0.5544	0.5597	0.5052
223	Uncharacterized protein OS=Nannochloropsis gaditana GN=Naga_100050g39 PE=4 SV=1	W7U1E9_9STRA	Naga_100050g39	30 kDa	23	0.29	0.0001	16.17	16.33	16.21	16.24	16.57	16.47	16.53	16.55	-0.0846	0.0859	-0.0284	-0.0122	0.3109	0.2309	0.2806	0.3032
224	Pyruvate kinase OS=Nannochloropsis gaditana GN=Naga_100197g3 PE=3 SV=1	W7TLB7_9STRA	Naga_100197g3	86 kDa	86	0.25	0.0001	16.02	16.01	15.94	15.92	16.33	16.17	16.25	16.14	0.056	0.0398	-0.0325	-0.0522	0.3497	0.1986	0.2724	0.1642
225	U4/U6 small nuclear ribonucleoprotein SNU13 OS=Nannochloropsis gaditana (strain CCMP526) GN=SNU13 PE=4 SV=1	K8YVC8_NANGC	SNU13	14 kDa	8	0.45	0.0001	15.83	15.6	15.75	15.74	16.38	16.22	16.18	16.01	0.0909	-0.1335	0.0061	0.0067	0.6392	0.477	0.4467	0.2715
226	60s ribosomal protein l24 OS=Nannochloropsis gaditana GN=Naga_100026g22 PE=4 SV=1	W7TW72_9STRA	Naga_100026g22	18 kDa	27	-0.23	0.0001	17.11	17.11	17.11	17.15	16.83	16.86	17.03	16.82	-0.014	-0.0043	-0.0146	0.0266	-0.2924	-0.2657	-0.0937	-0.3039
227	Beta-aspartyl asparaginyl family OS=Nannochloropsis gaditana GN=Naga_100272g1 PE=4 SV=1	W7TMK2_9STRA	Naga_100272g1	36 kDa	40	-0.57	0.0001	16.9	16.68	16.65	16.52	16.07	16.21	15.94	16.11	0.2484	0.0156	-0.0117	-0.1483	-0.5907	-0.4499	-0.7212	-0.5445
228	Elongation factor ef-3 OS=Nannochloropsis gaditana GN=Naga_100078g16 PE=4 SV=1	W7TJN4_9STRA	Naga_100078g16	49 kDa	19	0.31	0.0001	16.73	16.68	16.6	16.79	17.17	16.85	17.17	16.86	0.0363	-0.0192	-0.1019	0.0924	0.4709	0.1447	0.4665	0.1659
229	Acetohydroxy acid isomeroreductase, catalytic OS=Nannochloropsis gaditana GN=Naga_100208g4 PE=4 SV=1	W7TPK9_9STRA	Naga_100208g4	67 kDa	87	-0.29	0.0001	16.03	16.09	16.01	16.08	15.71	15.83	15.79	15.75	-0.0301	0.052	-0.0343	0.0331	-0.348	-0.2177	-0.2694	-0.2957
230	Uncharacterized protein OS=Nannochloropsis gaditana GN=Naga_100012g8 PE=4 SV=1	W7TMD3_9STRA	Naga_100012g8	33 kDa	13	0.47	0.0001	15.22	15.25	15.25	15.26	15.7	15.56	15.75	15.85	-0.0289	0.0061	-0.0099	0.0183	0.4555	0.3119	0.5212	0.6068
231	Hypersensitive-induced response protein OS=Nannochloropsis gaditana GN=Naga_100196g11 PE=4 SV=1	W7TY57_9STRA	Naga_100196g11	33 kDa	22	0.38	0.0001	15.42	15.32	15.43	15.27	15.81	15.72	15.82	15.64	0.0533	-0.0357	0.0701	-0.0993	0.453	0.3759	0.4711	0.2796
232	30S ribosomal protein S10, chloroplastic OS=Nannochloropsis gaditana GN=rps10 PE=3 SV=1	K9ZV80_9STRA	rps10	14 kDa	15	-0.72	0.0001	17.28	17.41	17.5	17.41	16.53	16.68	16.78	16.69	-0.113	-0.0073	0.0941	0.0026	-0.8545	-0.7001	-0.6193	-0.6993
233	Rab gtpase OS=Nannochloropsis gaditana GN=Naga_100059g6 PE=4 SV=1	W7TKL6_9STRA	Naga_100059g6	33 kDa	19	0.34	0.0001	17.3	17.06	17.18	17.05	17.51	17.53	17.5	17.45	0.1628	-0.0835	0.0303	-0.0993	0.3428	0.3688	0.3462	0.2912
234	Glyceraldehyde-3-phosphate dehydrogenase OS=Nannochloropsis gaditana GN=Naga_100081g17 PE=3 SV=1	W7T2Q2_9STRA	Naga_100081g17	40 kDa	117	0.29	0.0001	15.87	16.52	16.09	16.15	16.41	16.5	16.45	16.49	-0.324	0.34	-0.0917	-0.0268	0.2378	0.3334	0.2707	0.3172
235	Glycosyl hydrolase OS=Nannochloropsis gaditana (strain CCMP526) GN=NGA_0244600 PE=4 SV=1	K8YTB8_NANGC	NGA_0244600	48 kDa	14	0.69	0.0001	15.75	16.16	16.31	16.34	16.36	16.49	17.22	17.77	-0.4299	-0.0163	0.1269	0.1637	0.1852	0.3293	1.0374	1.5856
236	Cupin, RmlC-type OS=Nannochloropsis gaditana GN=Naga_100122g12 PE=4 SV=1	W7TWJ4_9STRA	Naga_100122g12	38 kDa	6	0.41	0.0001	15.45	15.6	15.49	15.57	16.01	15.92	15.97	15.85	-0.0762	0.0771	-0.0426	0.0458	0.4807	0.3907	0.4384	0.3196
237	Glycylpeptide N-tetradecanoyltransferase OS=Nannochloropsis gaditana GN=Naga_100004g141 PE=3 SV=1	W7TQ34_9STRA	Naga_100004g141	54 kDa	12	0.35	0.0001	16.44	16.35	16.49	16.43	16.78	16.77	16.81	16.75	0.0182	-0.0811	0.0589	-0.0035	0.3555	0.3421	0.3881	0.3256
238	Uncharacterized protein OS=Nannochloropsis gaditana GN=Naga_100185g3 PE=4 SV=1	W7TJW5_9STRA (+1)	Naga_100185g3	31 kDa	12	0.68	0.0001	14.83	15.07	15.06	14.94	15.78	15.44	15.69	15.76	-0.1583	0.0937	0.0796	-0.0441	0.7928	0.4687	0.6937	0.7832
239	Splicing arginine serine-rich 1 9 OS=Nannochloropsis gaditana GN=Naga_100293g3 PE=4 SV=1	W7T8W4_9STRA	Naga_100293g3	34 kDa	9	0.55	0.0001	14.81	15.2	15.4	15.02	15.56	15.67	15.83	15.66	-0.3064	0.0804	0.2773	-0.1207	0.4485	0.5501	0.7059	0.5453
240	Light-independent protochlorophyllide reductase subunit B OS=Nannochloropsis gaditana GN=chlB PE=3 SV=1	K9ZXE9_9STRA (+1)	chlB	58 kDa	23	-0.6	0.0001	15.55	15.45	15.54	15.43	14.81	14.94	14.9	14.96	0.0738	-0.0376	0.0548	-0.0578	-0.6818	-0.5705	-0.6237	-0.5409
241	Uncharacterized protein OS=Nannochloropsis gaditana GN=Naga_100115g7 PE=4 SV=1	W7UAZ3_9STRA	Naga_100115g7	47 kDa	31	0.34	0.0001	17.03	16.86	16.93	16.93	17.34	17.2	17.27	17.3	0.0887	-0.074	-0.0169	-0.0066	0.3997	0.2671	0.3301	0.3732
242	ATPase, F0 complex, subunit D, mitochondrial OS=Nannochloropsis gaditana GN=Naga_100824g2 PE=4 SV=1	W7U348_9STRA	Naga_100824g2	21 kDa	31	0.3	0.0001	17.04	17.17	17.17	17.25	17.46	17.26	17.54	17.58	-0.1485	0.0063	0.006	0.0898	0.2899	0.0933	0.3649	0.4146
243	Pyruvate carboxylase OS=Nannochloropsis gaditana GN=Naga_100002g147 PE=4 SV=1	W7TNH0_9STRA	Naga_100002g147	134 kDa	89	0.17	0.0001	16.13	16.23	16.19	16.08	16.24	16.28	16.44	16.36	-0.0341	0.0676	0.0211	-0.085	0.0792	0.1195	0.2707	0.194
244	Uncharacterized protein OS=Nannochloropsis gaditana (strain CCMP526) GN=NGA_0345402 PE=4 SV=1	K8Z730_NANGC (+1)	NGA_0345402	34 kDa	7	0.41	0.0001	15.6	15.88	15.89	15.81	16.2	16.21	16.18	16.23	-0.1959	0.083	0.0876	0.0062	0.398	0.4165	0.3814	0.4345
245	Gamma-butyrobetaine dioxygenase OS=Nannochloropsis gaditana (strain CCMP526) GN=NGA_0602100 PE=4 SV=1	K8YPM2_NANGC	NGA_0602100	54 kDa	15	-0.46	0.0001	16.11	16.06	16.07	16.12	15.59	15.8	15.64	15.39	0.0337	-0.022	-0.0124	0.042	-0.4964	-0.2875	-0.4638	-0.6997
246	Cellulase 2 OS=Nannochloropsis gaditana GN=Naga_100045g12 PE=3 SV=1	W7THM6_9STRA	Naga_100045g12	51 kDa	18	0.39	0.0001	16.62	16.45	16.46	16.59	17.07	16.6	16.98	17.01	0.0799	-0.0909	-0.0741	0.061	0.5439	0.0661	0.4484	0.4901
247	Glyceraldehyde-3-phosphate dehydrogenase OS=Nannochloropsis gaditana GN=GapC1 PE=3 SV=1	W7T2R0_9STRA (+1)	GapC1	40 kDa	292	-0.24	0.0001	16.4	16.41	16.27	16.34	16.21	16.15	16.05	16.04	0.042	0.0767	-0.0792	-0.0136	-0.1464	-0.2081	-0.3058	-0.3309
248	ATP synthase CF0 B'chain subunit II OS=Nannochloropsis gaditana GN=atpG PE=3 SV=1	K9ZVB1_9STRA	atpG	19 kDa	25	-0.3	0.0001	16.65	16.41	16.63	16.53	16.3	16.09	16.34	16.23	0.111	-0.1414	0.0863	-0.0149	-0.2464	-0.4643	-0.2025	-0.3282
249	Sec14 cytosolic OS=Nannochloropsis gaditana GN=Naga_100113g14 PE=4 SV=1	W7TCC3_9STRA	Naga_100113g14	36 kDa	5	0.46	0.0001	14.93	14.9	15.21	15.05	15.56	15.44	15.5	15.43	-0.0857	-0.1237	0.1887	0.0397	0.5396	0.4252	0.4777	0.4138
250	ATP synthase epsilon chain, chloroplastic OS=Nannochloropsis gaditana GN=atpE PE=3 SV=1	K9ZV64_9STRA	atpE	16 kDa	44	-0.43	0.0001	16.7	16.63	16.63	16.47	16.36	16.19	16.08	16.01	0.0934	0.0297	0.0192	-0.1392	-0.2408	-0.4075	-0.5085	-0.5711
251	50S ribosomal protein L27, chloroplastic OS=Nannochloropsis gaditana GN=rpl27 PE=3 SV=1	K9ZWH1_9STRA	rpl27	12 kDa	14	-0.5	0.0001	15.98	15.77	15.68	15.66	15.34	15.24	15.26	15.19	0.2304	0.0081	-0.0705	-0.0975	-0.4166	-0.5108	-0.4907	-0.556
252	Uncharacterized protein OS=Nannochloropsis gaditana GN=Naga_100049g3 PE=4 SV=1	W7TDK8_9STRA	Naga_100049g3	27 kDa	7	0.51	0.0001	16.64	16.72	16.56	16.5	17.12	17.21	17.12	17	0.0205	0.1098	-0.0512	-0.1	0.5081	0.6104	0.4956	0.3958
253	Uncharacterized protein OS=Nannochloropsis gaditana GN=Naga_100198g11 PE=4 SV=1	W7TT44_9STRA	Naga_100198g11	35 kDa	9	-0.55	0.0001	16.47	16.61	16.14	16.59	16.13	15.81	15.82	15.85	0.0262	0.1434	-0.3325	0.1279	-0.3352	-0.6543	-0.6333	-0.6151
254	Malate dehydrogenase OS=Nannochloropsis gaditana GN=Naga_100855g2 PE=3 SV=1	W7TN59_9STRA	Naga_100855g2	35 kDa	46	0.32	0.0001	17.28	17.49	17.2	17.24	17.73	17.62	17.62	17.53	-0.0419	0.1918	-0.1114	-0.0569	0.424	0.3171	0.3126	0.2207
255	Clathrin heavy chain OS=Nannochloropsis gaditana GN=Naga_100007g70 PE=3 SV=1	W7U8K2_9STRA	Naga_100007g70	196 kDa	124	0.11	0.0001	16.29	16.34	16.28	16.34	16.34	16.34	16.54	16.43	-0.0288	0.0218	-0.0392	0.0269	0.024	0.0224	0.2186	0.1209
256	14-3-3-like protein OS=Nannochloropsis gaditana GN=Naga_100026g40 PE=3 SV=1	W7TWA9_9STRA	Naga_100026g40	29 kDa	84	0.35	0.0001	16.38	16.29	16.22	16.2	16.74	16.62	16.58	16.54	0.1144	0.0093	-0.0408	-0.0705	0.4626	0.3365	0.3043	0.2651
257	Photosystem I P700 chlorophyll a apoprotein A2 OS=Nannochloropsis gaditana GN=psaB PE=3 SV=1	K9ZV65_9STRA (+1)	psaB	83 kDa	48	-0.39	0.0001	17.31	17.22	17.12	17.2	16.86	16.88	16.86	16.53	0.0941	0.0197	-0.0854	0.0075	-0.3344	-0.323	-0.3487	-0.6606
258	Light-independent protochlorophyllide reductase iron-sulfur ATP-binding protein OS=Nannochloropsis gaditana GN=chlL PE=3 SV=1	K9ZV32_9STRA	chlL	32 kDa	3	-1.34	0.0001	15.32	15.11	15.27	15.1	13.66	13.97	13.64	14.08	0.127	-0.089	0.0691	-0.0917	-1.5971	-1.2323	-1.5133	-1.1415
259	Glyceraldehyde-3-phosphate dehydrogenase OS=Nannochloropsis gaditana GN=Naga_100001g58 PE=3 SV=1	W7U208_9STRA	Naga_100001g58	31 kDa	10	0.68	0.0001	15.82	16.41	16.29	16.27	16.85	16.86	16.99	16.96	-0.4126	0.1684	0.0581	0.0458	0.6325	0.6238	0.7809	0.7373
260	Atp-dependent chaperone OS=Nannochloropsis gaditana GN=Naga_100040g42 PE=3 SV=1	W7TTU9_9STRA	Naga_100040g42	111 kDa	51	-0.26	0.0001	16.38	16.27	16.43	16.31	16	16.2	16.06	16.02	0.037	-0.0803	0.0869	-0.0338	-0.3478	-0.1402	-0.289	-0.3222
261	Phosphate metabolism protein 7 OS=Nannochloropsis gaditana GN=Naga_100007g21 PE=4 SV=1	W7U887_9STRA	Naga_100007g21	89 kDa	17	0.35	0.0001	16.16	16.09	16.18	16.17	16.48	16.43	16.66	16.4	0.0117	-0.0576	0.0209	0.0146	0.3216	0.2837	0.5043	0.2593
262	Mitochondrial carrier domain-containing protein OS=Nannochloropsis gaditana (strain CCMP526) GN=NGATSA_3015000 PE=2 SV=1	I2CPJ0_NANGC	NGATSA_3015000	32 kDa	26	0.21	0.0001	16.25	16.15	16.26	16.22	16.45	16.48	16.42	16.39	0.0328	-0.0785	0.0405	-0.0113	0.2289	0.2597	0.1977	0.166
263	50S ribosomal protein L29 OS=Nannochloropsis gaditana GN=rbcl29 PE=4 SV=1	K9ZWJ0_9STRA	rbcl29	8 kDa	18	-0.44	0.0001	16.61	16.43	16.44	16.42	16.01	15.99	16.09	16.02	0.1133	-0.0329	-0.0286	-0.0287	-0.4491	-0.4762	-0.3694	-0.4463
264	Chaperonin OS=Nannochloropsis gaditana GN=Naga_100014g40 PE=3 SV=1	W7U0H6_9STRA	Naga_100014g40	66 kDa	34	-0.27	0.0001	16.06	16.04	16.07	16.05	15.83	15.86	15.73	15.78	0.0049	-0.0145	0.012	-0.005	-0.2201	-0.2045	-0.3306	-0.2703
265	40s ribosomal protein s26 OS=Nannochloropsis gaditana GN=Naga_100059g16 PE=4 SV=1	W7TNL3_9STRA	Naga_100059g16	23 kDa	17	-0.56	0.0001	16.82	16.96	17.01	16.88	16.28	16.28	16.48	16.43	-0.1053	0.0355	0.0912	-0.0301	-0.6364	-0.6367	-0.4393	-0.4895
266	Luminal binding protein OS=Nannochloropsis gaditana GN=Naga_100084g10 PE=3 SV=1	W7U0X5_9STRA	Naga_100084g10	80 kDa	34	0.21	0.0001	15.62	15.5	15.69	15.72	15.77	15.95	15.94	15.74	-0.0122	-0.1367	0.0618	0.0902	0.1404	0.3224	0.3055	0.1041
267	Uncharacterized protein (Fragment) OS=Nannochloropsis gaditana (strain CCMP526) GN=NGATSA_3016200 PE=2 SV=1	I2CR39_NANGC	NGATSA_3016200	63 kDa	24	-0.37	0.0001	15.52	15.33	15.5	15.47	15.12	15.05	15.13	15.04	0.069	-0.1238	0.0524	0.0267	-0.3254	-0.4068	-0.3178	-0.4086
268	Rab11 family gtpase OS=Nannochloropsis gaditana GN=Naga_100024g60 PE=4 SV=1	W7TSA3_9STRA	Naga_100024g60	36 kDa	31	0.23	0.0001	16.09	16.09	16.01	16.08	16.32	16.3	16.31	16.29	0.0274	0.0203	-0.0538	0.0077	0.2419	0.2339	0.243	0.2202
269	Delta-1-pyrroline-5-carboxylate dehydrogenase 1 protein (Fragment) OS=Nannochloropsis gaditana GN=Naga_102301g1 PE=4 SV=1	W7TU00_9STRA	Naga_102301g1	33 kDa	20	0.42	0.0001	15.37	15.64	15.37	15.47	15.85	15.94	16	15.75	-0.1058	0.1716	-0.1131	-0.0094	0.3718	0.468	0.5222	0.2722
270	Pre-mRNA-processing factor 8 OS=Nannochloropsis gaditana (strain CCMP526) GN=NGATSA_3004000 PE=2 SV=1	I2CNX7_NANGC	NGATSA_3004000	268 kDa	37	0.21	0.0001	15.82	15.75	15.81	15.78	15.91	16.02	16.14	15.96	0.0205	-0.0368	0.0277	-0.0063	0.1302	0.2365	0.3483	0.1824
271	Uncharacterized protein OS=Nannochloropsis gaditana GN=Naga_100081g21 PE=4 SV=1	W7TBS5_9STRA	Naga_100081g21	52 kDa	15	-0.31	0.0001	17.07	17.13	16.9	17.01	16.75	16.7	16.76	16.65	0.0402	0.1109	-0.1225	-0.0108	-0.2873	-0.3359	-0.2603	-0.3759
272	Putative ubiquitin carboxyl-terminal hydrolase faf-x isoform 2 OS=Nannochloropsis gaditana GN=Naga_100069g8 PE=3 SV=1	W7U4H4_9STRA	Naga_100069g8	389 kDa	22	0.26	0.0001	14.87	15.03	15.06	15.1	15.2	15.14	15.38	15.41	-0.1539	0.0024	0.0439	0.0744	0.178	0.107	0.3602	0.3852
273	Hybrid cluster protein OS=Nannochloropsis gaditana (strain CCMP526) GN=NGA_0422402 PE=3 SV=1	K8Z7R3_NANGC (+1)	NGA_0422402	70 kDa	7	-0.64	0.0001	15.83	16.18	15.91	15.95	15.16	15.51	15.13	15.59	-0.1277	0.2103	-0.0487	-0.021	-0.8216	-0.4465	-0.823	-0.391
274	Glycerol-3-phosphate dehydrogenase OS=Nannochloropsis gaditana GN=GPD PE=4 SV=1	W7TFA5_9STRA	GPD	15 kDa	5	0.47	0.0001	15.11	15.07	15.22	15.25	15.55	15.88	15.65	15.53	-0.0542	-0.1036	0.0512	0.0856	0.388	0.7167	0.4798	0.3665
275	ATP-dependent Clp protease OS=Nannochloropsis gaditana GN=clpC PE=4 SV=1	K9ZV84_9STRA	clpC	44 kDa	43	-0.24	0.0001	16.29	16.27	16.24	16.23	16.02	16.05	16	15.99	0.0546	0.0152	-0.0174	-0.0277	-0.2412	-0.2055	-0.2712	-0.29
276	Ribosomal protein s16 OS=Nannochloropsis gaditana GN=Naga_100010g88 PE=3 SV=1	W7U2S1_9STRA	Naga_100010g88	16 kDa	26	-0.28	0.0001	17.6	17.82	17.82	17.78	17.21	17.61	17.55	17.51	-0.1756	0.0616	0.0571	0.0128	-0.5528	-0.1587	-0.2103	-0.2616
277	Assembly protein OS=Nannochloropsis gaditana (strain CCMP526) GN=NGA_0674500 PE=4 SV=1	K8YSK7_NANGC (+1)	NGA_0674500	63 kDa	12	-0.48	0.0001	16.78	16.77	16.87	16.86	16.31	16.31	16.29	16.48	-0.0446	-0.0673	0.0597	0.0447	-0.5122	-0.5034	-0.5413	-0.3646
278	Intron-binding protein aquarius OS=Nannochloropsis gaditana GN=Naga_100271g3 PE=4 SV=1	W7TJX7_9STRA	Naga_100271g3	132 kDa	21	0.23	0.0001	15.42	15.45	15.62	15.59	15.73	15.59	15.88	15.79	-0.1009	-0.0704	0.1061	0.0707	0.2056	0.0713	0.3525	0.2674
279	Quinoid dihydropteridine reductase OS=Nannochloropsis gaditana GN=Naga_100075g5 PE=4 SV=1	W7TLL0_9STRA	Naga_100075g5	29 kDa	5	0.58	0.0001	16.42	16.37	16.53	16.37	16.94	16.84	17.18	17.03	-0.021	-0.0566	0.106	-0.0542	0.5121	0.4186	0.7513	0.6024
280	Ethylene-inducible protein OS=Nannochloropsis gaditana GN=Naga_100043g37 PE=3 SV=1	W7TRK1_9STRA	Naga_100043g37	37 kDa	18	-0.29	0.0001	16.27	16.2	16.22	16.2	15.9	16.06	15.89	15.88	0.0469	-0.0209	0.0054	-0.0246	-0.3288	-0.1558	-0.3291	-0.3533
281	Phosphoglucomutase OS=Nannochloropsis gaditana (strain CCMP526) GN=PGM PE=4 SV=1	K8YYJ2_NANGC	PGM	72 kDa	31	-0.37	0.0001	15.68	15.73	15.53	15.53	15.28	15.33	15.2	15.17	0.0718	0.1193	-0.0845	-0.0794	-0.3377	-0.2952	-0.4133	-0.4406
282	Transmembrane protease, serine 2 OS=Nannochloropsis gaditana (strain CCMP526) GN=TMPRSS2 PE=3 SV=1	K8YUN8_NANGC (+1)	TMPRSS2	62 kDa	21	0.4	0.0001	16.16	16.26	16.32	16.4	16.81	16.55	16.66	16.77	-0.1297	-0.0395	0.0288	0.1116	0.5115	0.267	0.3789	0.4972
283	Uncharacterized protein OS=Nannochloropsis gaditana (strain CCMP526) GN=NGA_0689200 PE=4 SV=1	K8Z9C1_NANGC	NGA_0689200	115 kDa	22	0.39	0.0001	15.96	15.51	15.93	15.99	16.6	15.82	16.31	16.42	0.0768	-0.3969	0.0403	0.1019	0.7176	-0.0761	0.4305	0.5684
284	Tpr repeat-containing thioredoxin ttl1 OS=Nannochloropsis gaditana GN=Naga_100148g8 PE=4 SV=1	W7TX94_9STRA	Naga_100148g8	137 kDa	34	0.32	0.0001	16.07	15.92	16	15.96	16.35	16.27	16.33	16.32	0.082	-0.0638	0.0163	-0.0199	0.3702	0.2892	0.3495	0.3307
285	Molecular chaperone HtpG OS=Nannochloropsis gaditana (strain CCMP526) GN=HTPG PE=3 SV=1	K8YR18_NANGC	HTPG	81 kDa	212	-0.14	0.0001	16.57	16.54	16.35	16.42	16.38	16.36	16.32	16.26	0.107	0.0857	-0.1148	-0.0318	-0.0824	-0.1028	-0.1507	-0.2105
286	Uncharacterized protein OS=Nannochloropsis gaditana (strain CCMP526) GN=NGA_0023802 PE=4 SV=1	K8Z5Z7_NANGC (+1)	NGA_0023802	22 kDa	30	0.47	0.0001	15.86	15.97	16.05	16.37	16.67	16.06	16.87	16.74	-0.223	-0.0954	-0.0151	0.3087	0.5937	-0.0093	0.7808	0.6705
287	Clavaminate synthase-like protein OS=Nannochloropsis gaditana GN=Naga_100010g48 PE=4 SV=1	W7U3A1_9STRA	Naga_100010g48	47 kDa	15	-0.37	0.0001	16.83	17.1	16.79	16.81	16.38	16.68	16.53	16.46	-0.048	0.2226	-0.0841	-0.0709	-0.4947	-0.1866	-0.3484	-0.4132
288	Phosphate phosphoenolpyruvate translocator OS=Nannochloropsis gaditana GN=Naga_100100g11 PE=4 SV=1	W7UCI0_9STRA	Naga_100100g11	44 kDa	9	-0.58	0.0001	16.37	16.21	16.15	16.26	15.71	15.81	15.72	15.26	0.1202	-0.03	-0.0899	0.0271	-0.5118	-0.4345	-0.521	-0.9565
289	ATPase, AAA-type, core OS=Nannochloropsis gaditana GN=Naga_100045g24 PE=3 SV=1	W7TK84_9STRA	Naga_100045g24	99 kDa	100	-0.22	0.0001	15.91	16.06	15.9	16.03	15.73	15.84	15.78	15.71	-0.0735	0.0705	-0.0789	0.0509	-0.2702	-0.1496	-0.2076	-0.2747
290	30S ribosomal protein S17, chloroplastic OS=Nannochloropsis gaditana GN=rps17 PE=3 SV=1	K9ZVE6_9STRA	rps17	10 kDa	13	-0.94	0.0001	17.61	17.27	17.46	17.51	16.54	16.39	16.49	16.6	0.1602	-0.1786	-0.0035	0.0552	-0.8802	-1.0672	-0.9501	-0.8268
291	WD40-repeat-containing protein OS=Nannochloropsis gaditana GN=Naga_100026g62 PE=4 SV=1	W7UBN0_9STRA	Naga_100026g62	138 kDa	35	0.23	0.0001	16.22	16.21	16.27	16.17	16.52	16.46	16.46	16.37	0.0156	-0.0121	0.0473	-0.0475	0.3018	0.247	0.2465	0.149
292	Uncharacterized protein OS=Nannochloropsis gaditana (strain CCMP526) GN=NGA_0727200 PE=4 SV=1	K8Z949_NANGC	NGA_0727200	68 kDa	11	0.74	0.0001	13.98	13.71	14.21	14.25	14.91	14.38	14.97	15.02	-0.0815	-0.3422	0.1446	0.1979	0.8403	0.3158	0.8871	0.9543
293	Pheophorbide a oxygenase OS=Nannochloropsis gaditana GN=PAO2 PE=4 SV=1	W7TRP5_9STRA	PAO2	62 kDa	14	0.4	0.0001	15.06	15.07	15.1	15.13	15.32	15.31	15.64	15.62	-0.0352	-0.027	-0.0028	0.0437	0.2431	0.2413	0.5487	0.5278
294	Sulfite oxidase OS=Nannochloropsis gaditana (strain CCMP526) GN=NGATSA_3007400 PE=2 SV=1	I2CP30_NANGC	NGATSA_3007400	64 kDa	13	0.38	0.0001	16.42	16.53	16.33	16.33	16.81	16.73	16.75	16.84	0.0005	0.119	-0.0834	-0.0739	0.41	0.3168	0.3423	0.4356
295	Guanine nucleotide binding protein OS=Nannochloropsis gaditana GN=Naga_100059g26 PE=4 SV=1	W7TVV4_9STRA	Naga_100059g26	35 kDa	49	-0.22	0.0001	16.39	15.97	15.81	15.9	15.75	15.81	15.77	15.61	0.3943	0.002	-0.1693	-0.0713	-0.2299	-0.158	-0.2038	-0.3635
296	Uncharacterized protein OS=Nannochloropsis gaditana GN=Naga_100118g23 PE=4 SV=1	W7T760_9STRA	Naga_100118g23	30 kDa	13	0.39	0.0001	16.46	16.37	16.39	16.2	16.79	16.71	16.72	16.77	0.0994	0.0131	0.0269	-0.1579	0.4269	0.3585	0.3601	0.4027
297	30S ribosomal protein S6, chloroplastic OS=Nannochloropsis gaditana GN=rps6 PE=3 SV=1	K9ZVD6_9STRA	rps6	12 kDa	11	-0.74	0.0001	16.95	16.88	16.92	16.9	16.12	16.19	16.23	16.15	0.0289	-0.0261	0.0179	-0.0099	-0.7804	-0.7135	-0.6578	-0.7479
298	30S ribosomal protein S4, chloroplastic OS=Nannochloropsis gaditana GN=rps4 PE=3 SV=1	K9ZV42_9STRA	rps4	25 kDa	29	-0.41	0.0001	16.35	16.24	16.31	16.3	15.85	15.91	15.93	15.87	0.0578	-0.0589	0.0099	-0.0022	-0.4503	-0.3987	-0.3739	-0.4548
299	6-phosphogluconate dehydrogenase, decarboxylating OS=Nannochloropsis gaditana GN=Naga_100009g12 PE=3 SV=1	W7TN92_9STRA	Naga_100009g12	54 kDa	53	0.23	0.0001	16.08	16.29	16.16	16.22	16.37	16.4	16.53	16.41	-0.1334	0.0961	-0.0341	0.024	0.1826	0.2052	0.3263	0.222
300	Eukaryotic initiation factor 4a-iii OS=Nannochloropsis gaditana GN=Naga_100214g8 PE=3 SV=1	W7TCP3_9STRA	Naga_100214g8	47 kDa	27	0.28	0.0001	15.98	16.01	16.14	15.99	16.34	16.36	16.33	16.25	-0.0465	-0.0274	0.0999	-0.0493	0.2984	0.3277	0.2878	0.2037
301	Inorganic pyrophosphatase (Fragment) OS=Nannochloropsis gaditana (strain CCMP526) GN=NGATSA_3012500 PE=2 SV=1	I2CQZ4_NANGC	NGATSA_3012500	34 kDa	11	0.35	0.0001	16.24	16.31	16.3	16.2	16.74	16.55	16.58	16.57	-0.0279	0.0491	0.0339	-0.0628	0.4773	0.2892	0.3096	0.3067
302	Mitochondrial carrier protein OS=Nannochloropsis gaditana GN=Naga_100061g6 PE=3 SV=1	W7TBN9_9STRA (+1)	Naga_100061g6	35 kDa	7	0.53	0.0001	15.32	15.34	15.38	15.43	15.9	15.64	16.05	15.94	-0.0423	-0.024	-0.0022	0.0612	0.5307	0.2875	0.6849	0.5677
303	ABC transporter OS=Nannochloropsis gaditana GN=ycf24 PE=4 SV=1	K9ZV11_9STRA	ycf24	56 kDa	19	-0.35	0.0001	16.55	16.51	16.62	16.57	16.15	16.27	16.23	16.19	-0.0128	-0.056	0.0608	0.0042	-0.4154	-0.3004	-0.3337	-0.3804
304	Mitochondrial tricarboxylate transport protein OS=Nannochloropsis gaditana GN=Naga_100257g7 PE=3 SV=1	W7TVE3_9STRA	Naga_100257g7	41 kDa	12	0.68	0.0001	16.2	16.16	16.21	16.21	16.93	16.72	17.03	16.83	0.0003	-0.0394	0.0159	0.0158	0.7332	0.4875	0.823	0.6239
305	Pyruvate kinase OS=Nannochloropsis gaditana GN=PYK PE=3 SV=1	W7TV27_9STRA	PYK	61 kDa	17	0.23	0.0001	16.36	16.31	16.44	16.46	16.62	16.54	16.77	16.6	-0.0377	-0.0799	0.0489	0.0601	0.2199	0.1349	0.3745	0.2058
306	Prohibitin OS=Nannochloropsis gaditana GN=Naga_100020g11 PE=4 SV=1	W7TLA3_9STRA	Naga_100020g11	30 kDa	29	0.16	0.0001	16.32	16.19	16.35	16.34	16.37	16.37	16.59	16.55	0.0168	-0.1116	0.0511	0.0329	0.0706	0.072	0.2845	0.2386
307	Endoribonuclease l-psp OS=Nannochloropsis gaditana (strain CCMP526) GN=NGA_0404200 PE=4 SV=1	K8Z7E9_NANGC (+1)	NGA_0404200	20 kDa	11	0.37	0.0001	16.06	16.05	15.93	15.89	16.37	16.43	16.37	16.25	0.0762	0.063	-0.0451	-0.0927	0.3891	0.4528	0.39	0.2718
308	Uncharacterized protein OS=Nannochloropsis gaditana GN=Naga_100282g1 PE=4 SV=1	W7TP62_9STRA	Naga_100282g1	52 kDa	8	0.36	0.0001	16.69	16.58	16.69	16.71	17.14	16.98	17.01	16.99	0.0262	-0.0864	0.0209	0.0468	0.4676	0.3182	0.3433	0.327
309	Rna binding protein OS=Nannochloropsis gaditana GN=Naga_100036g7 PE=4 SV=1	W7U5L7_9STRA	Naga_100036g7	60 kDa	9	0.32	0.0001	15.32	15.14	15.27	15.27	15.64	15.53	15.59	15.52	0.0585	-0.1135	0.0169	0.0193	0.3853	0.2771	0.3339	0.2697
310	Dna-binding horma domain-containing protein OS=Nannochloropsis gaditana GN=Naga_100017g56 PE=4 SV=1	W7TUM6_9STRA	Naga_100017g56	25 kDa	6	0.41	0.0001	15.24	15.27	15.27	15.17	15.69	15.61	15.65	15.61	-0.0008	0.0342	0.0297	-0.066	0.4577	0.3679	0.4182	0.3804
311	Chaperonin cpn60 tcp-1 OS=Nannochloropsis gaditana GN=Naga_100453g5 PE=3 SV=1	W7TUV6_9STRA	Naga_100453g5	26 kDa	12	-0.42	0.0001	16.33	16.16	16.29	16.21	15.94	15.83	15.74	15.82	0.0956	-0.0808	0.0531	-0.0275	-0.3028	-0.4138	-0.4973	-0.4098
312	Photosystem II CP43 reaction center protein OS=Nannochloropsis gaditana GN=psbC PE=3 SV=1	T1RI73_9STRA	psbC	52 kDa	90	-0.29	0.0001	15.29	15.53	15.47	15.59	15.14	15.31	15.23	15.04	-0.2131	0.0558	-0.0085	0.1111	-0.3561	-0.1843	-0.2581	-0.4356
313	NADH dehydrogenase OS=Nannochloropsis gaditana (strain CCMP526) GN=NDH PE=4 SV=1	K8YWV3_NANGC (+1)	NDH	45 kDa	4	0.36	0.0001	15.64	15.54	15.63	15.51	15.99	15.89	16	15.9	0.0551	-0.0375	0.0507	-0.0724	0.4066	0.311	0.4183	0.3184
314	Ccr4-not transcription OS=Nannochloropsis gaditana GN=Naga_100038g5 PE=4 SV=1	W7TUR4_9STRA	Naga_100038g5	291 kDa	26	0.21	0.0001	15.14	15.14	15.28	15.27	15.35	15.3	15.53	15.49	-0.0737	-0.076	0.0709	0.0567	0.1467	0.1005	0.3208	0.2845
315	Ribosomal protein l15 OS=Nannochloropsis gaditana GN=Naga_100095g3 PE=3 SV=1	W7TRQ0_9STRA	Naga_100095g3	33 kDa	15	-0.52	0.0001	15.54	15.59	15.53	15.58	14.93	15	15.04	15.22	-0.0394	0.0241	-0.0293	0.0184	-0.6384	-0.5801	-0.5296	-0.3543
316	Translation protein SH3 OS=Nannochloropsis gaditana GN=Naga_100011g77 PE=4 SV=1	W7TPY3_9STRA	Naga_100011g77	17 kDa	41	-0.31	0.0001	16.49	16.45	16.46	16.45	16.1	16.17	16.33	16.02	0.0249	-0.0159	0.005	-0.013	-0.3752	-0.2885	-0.1391	-0.4361
317	Small nuclear ribonucleoprotein component OS=Nannochloropsis gaditana GN=Snu114 PE=4 SV=1	W7TM02_9STRA	Snu114	111 kDa	29	0.21	0.0001	16.54	16.49	16.59	16.58	16.66	16.75	16.85	16.77	-0.0134	-0.0602	0.0397	0.0346	0.1056	0.2099	0.2943	0.2269
318	Uncharacterized protein (Fragment) OS=Nannochloropsis gaditana (strain CCMP526) GN=NGA_0630800 PE=4 SV=1	K8Z4G0_NANGC (+1)	NGA_0630800	44 kDa	16	0.85	0.0001	15.52	15.74	16.39	16.48	16.22	16.7	17.41	17.62	-0.6028	-0.396	0.2521	0.338	0.0906	0.5551	1.2737	1.4682
319	Glucosamine--fructose-6-phosphate aminotransferase (Isomerizing) OS=Nannochloropsis gaditana (strain CCMP526) GN=GLMS PE=4 SV=1	K8YQF5_NANGC (+1)	GLMS	75 kDa	23	0.33	0.0001	15.95	16.04	16.24	16.21	16.35	16.36	16.57	16.53	-0.1806	-0.0807	0.1214	0.0871	0.2248	0.2164	0.4417	0.4083
320	Splicing factor U2AF 65 kDa subunit OS=Nannochloropsis gaditana (strain CCMP526) GN=NGATSA_3005400 PE=2 SV=1	I2CP62_NANGC	NGATSA_3005400	45 kDa	5	0.51	0.0001	15.32	15.46	15.57	15.57	16.08	15.96	15.93	16.01	-0.1665	-0.0203	0.0922	0.0885	0.5966	0.4797	0.4521	0.5264
321	Small nuclear ribonucleoprotein D3 (Fragment) OS=Nannochloropsis gaditana (strain CCMP526) GN=NGATSA_3051200 PE=2 SV=1	I2CSB6_NANGC	NGATSA_3051200	14 kDa	7	0.38	0.0001	16.45	16.25	16.49	16.36	16.86	16.63	16.86	16.7	0.0563	-0.1312	0.1033	-0.0288	0.4726	0.2349	0.4597	0.3222
322	Uncharacterized protein OS=Nannochloropsis gaditana (strain CCMP526) GN=NGATSA_3008300 PE=2 SV=1	I2CPE2_NANGC	NGATSA_3008300	41 kDa	20	-0.25	0.0001	17	16.84	16.89	16.83	16.63	16.56	16.76	16.55	0.1229	-0.0467	0.0146	-0.0507	-0.2481	-0.3176	-0.1157	-0.3229
323	ATP-dependent clp protease ATP binding subunit OS=Nannochloropsis gaditana GN=clpC PE=4 SV=1	K9ZWA7_9STRA (+1)	clpC	50 kDa	37	-0.26	0.0001	17.12	16.92	16.94	16.9	16.76	16.78	16.65	16.61	0.163	-0.0449	-0.0268	-0.0587	-0.197	-0.1887	-0.3049	-0.3673
324	Quinoprotein amine dehydrogenase, beta chain OS=Nannochloropsis gaditana GN=Naga_100370g6 PE=4 SV=1	W7TI92_9STRA	Naga_100370g6	66 kDa	9	0.77	0.0001	15.11	14.95	15.62	15.7	15.99	15.67	16.34	16.7	-0.2494	-0.3975	0.2521	0.3445	0.6212	0.3103	0.9693	1.3294
325	Peptidase OS=Nannochloropsis gaditana GN=Naga_100189g11 PE=4 SV=1	W7T8L8_9STRA	Naga_100189g11	83 kDa	13	0.38	0.0001	15.33	15.25	15.31	15.34	15.66	15.69	15.72	15.68	0.0306	-0.0618	0.0003	0.0291	0.362	0.3849	0.4261	0.37
326	V-type proton ATPase subunit F OS=Nannochloropsis gaditana GN=Naga_100050g11 PE=3 SV=1	W7TU11_9STRA	Naga_100050g11	13 kDa	3	0.7	0.0001	16.3	16.19	16.34	16.1	17.11	16.91	16.91	16.81	0.0694	-0.0424	0.1069	-0.1308	0.8577	0.6732	0.6813	0.5671
327	Acy1-like metalloprotease OS=Nannochloropsis gaditana GN=Naga_100156g2 PE=4 SV=1	W7T1E0_9STRA	Naga_100156g2	51 kDa	10	0.4	0.0001	15.89	16.07	16	16.16	16.29	16.38	16.5	16.62	-0.1415	0.0329	-0.0415	0.1194	0.2469	0.3423	0.4573	0.5847
328	Uncharacterized protein OS=Nannochloropsis gaditana GN=Naga_100198g8 PE=4 SV=1	W7T909_9STRA	Naga_100198g8	20 kDa	13	0.55	0.0001	14.59	14.78	14.79	15.17	15.36	15.08	15.73	15.61	-0.2673	-0.0559	-0.0456	0.3383	0.5434	0.2406	0.8688	0.7508
329	Pyrophosphate-dependent phosphofructose kinase OS=Nannochloropsis gaditana GN=Naga_100268g2 PE=4 SV=1	W7TH71_9STRA	Naga_100268g2	58 kDa	39	0.21	0.0001	16.14	16.16	16.3	16.28	16.42	16.3	16.6	16.43	-0.0883	-0.0673	0.0769	0.0471	0.1887	0.0713	0.3706	0.2041
330	Aldo keto reductase (Fragment) OS=Nannochloropsis gaditana GN=Naga_100133g20 PE=4 SV=1	W7U7P9_9STRA	Naga_100133g20	113 kDa	11	0.56	0.0001	15.64	15.61	15.98	15.8	16.37	16.24	16.35	16.39	-0.1486	-0.1696	0.2115	0.0403	0.5834	0.4732	0.5635	0.6272
331	Glutathione s OS=Nannochloropsis gaditana GN=GST PE=3 SV=1	W7T781_9STRA	GST	30 kDa	10	0.4	0.0001	16.61	16.5	16.44	16.38	17.03	16.9	16.83	16.75	0.1218	0.0294	-0.0259	-0.0876	0.5675	0.4134	0.359	0.2797
332	Cold-inducible rna-binding protein OS=Nannochloropsis gaditana GN=Naga_100084g12 PE=4 SV=1	W7THV0_9STRA	Naga_100084g12	18 kDa	15	0.4	0.0001	16.83	16.3	16.76	16.77	17.21	16.93	17.05	17.17	0.1309	-0.3965	0.0654	0.074	0.5253	0.2412	0.3569	0.4833
333	Bifunctional dethiobiotin synthetase adenosylmethionine-8-amino-7-oxononanoate aminotransferase OS=Nannochloropsis gaditana GN=Naga_100010g64 PE=3 SV=1	W7TUI3_9STRA	Naga_100010g64	93 kDa	8	0.27	0.0001	15.4	15.64	15.53	15.52	15.61	15.86	15.87	15.83	-0.1214	0.117	0.0084	-0.0015	0.0873	0.3448	0.351	0.307
334	Uncharacterized protein OS=Nannochloropsis gaditana GN=Naga_100133g13 PE=4 SV=1	W7TRM4_9STRA	Naga_100133g13	75 kDa	18	0.54	0.0001	16.27	16.35	16.28	16.35	16.88	16.66	16.88	16.97	-0.0346	0.0412	-0.0339	0.0341	0.592	0.3683	0.5889	0.6909
335	Fumarylacetoacetate hydrolase OS=Nannochloropsis gaditana GN=Naga_100005g32 PE=4 SV=1	W7TY87_9STRA	Naga_100005g32	73 kDa	28	0.27	0.0001	16.4	16.54	16.46	16.41	16.76	16.69	16.73	16.74	-0.0571	0.0876	-0.0002	-0.0491	0.3043	0.2404	0.2696	0.2819
336	GDP-L-fucose synthetase OS=Nannochloropsis gaditana GN=Naga_100048g33 PE=3 SV=1	W7TZW1_9STRA	Naga_100048g33	67 kDa	19	-0.28	0.0001	16.73	16.65	16.51	16.58	16.51	16.28	16.24	16.26	0.1162	0.0406	-0.1026	-0.0315	-0.1002	-0.3311	-0.3692	-0.3525
337	Uncharacterized protein OS=Nannochloropsis gaditana GN=Naga00085 PE=4 SV=1	K9ZX55_9STRA	Naga00085	13 kDa	8	-0.4	0.0001	16.53	16.36	16.37	16.37	15.99	15.92	16.11	15.98	0.1166	-0.0338	-0.0414	-0.0364	-0.4024	-0.4904	-0.2942	-0.4151
338	Polyadenylate-binding protein 2 OS=Nannochloropsis gaditana GN=Naga_100013g14 PE=4 SV=1	W7UCN7_9STRA	Naga_100013g14	27 kDa	4	0.5	0.0001	15.68	15.8	15.88	16.04	16.21	16.37	16.52	16.33	-0.1757	-0.0595	0.0232	0.1841	0.3576	0.5192	0.668	0.4731
339	Cullin-associated nedd8-dissociated protein 1 OS=Nannochloropsis gaditana GN=Naga_100192g9 PE=4 SV=1	W7U372_9STRA	Naga_100192g9	149 kDa	38	0.2	0.0001	15.7	15.69	15.78	15.76	15.9	15.91	16.03	15.91	-0.0355	-0.0488	0.0394	0.0279	0.1718	0.173	0.2885	0.1679
340	Dihydrolipoamide succinyltransferase OS=Nannochloropsis gaditana GN=Naga_100165g9 PE=4 SV=1	W7TJE0_9STRA	Naga_100165g9	49 kDa	11	0.42	0.0001	17.74	17.56	17.62	17.51	17.95	18.09	18.09	17.95	0.1474	-0.0453	0.0257	-0.0843	0.3418	0.5073	0.4864	0.3548
341	Abc transporter atpase OS=Nannochloropsis gaditana (strain CCMP526) GN=NGA_0207400 PE=4 SV=1	K8YTI6_NANGC	NGA_0207400	38 kDa	6	0.34	0.0001	15.65	15.78	15.93	15.97	16.08	16.06	16.26	16.29	-0.1842	-0.0583	0.0972	0.1332	0.2487	0.2242	0.4218	0.4541
342	Splicing factor, arginine/serine-rich 1/9 OS=Nannochloropsis gaditana (strain CCMP526) GN=NGATSA_3026900 PE=2 SV=1	I2CRG1_NANGC	NGATSA_3026900	32 kDa	14	0.41	0.0001	15.66	16.18	16.25	15.75	16.39	16.42	16.52	16.26	-0.3333	0.1916	0.2523	-0.2404	0.4001	0.4212	0.5223	0.2606
343	NADH dehydrogenase (Ubiquinone) 1 alpha subcomplex 9 OS=Nannochloropsis gaditana (strain CCMP526) GN=NGATSA_3007600 PE=2 SV=1	I2CP55_NANGC	NGATSA_3007600	41 kDa	22	0.23	0.0001	16.8	16.79	16.83	16.78	17.01	17.04	17.13	16.95	0.0036	-0.0113	0.0387	-0.0206	0.2134	0.241	0.3214	0.159
344	30S ribosomal protein S11, chloroplastic OS=Nannochloropsis gaditana GN=rps11 PE=3 SV=1	A0A023PJS0_9STRA (+1)	rps11	15 kDa	16	-0.5	0.0001	15.87	15.78	15.82	15.94	15.39	15.2	15.36	15.42	0.0129	-0.0682	-0.0272	0.0895	-0.4731	-0.6584	-0.4815	-0.453
345	Choline dehydrogenase OS=Nannochloropsis gaditana (strain CCMP526) GN=NGA_0429100 PE=3 SV=1	K8Z9H5_NANGC	NGA_0429100	63 kDa	13	0.39	0.0001	14.96	15.03	15.04	14.92	15.39	15.27	15.43	15.42	-0.0243	0.0273	0.057	-0.0657	0.3935	0.2928	0.4406	0.4327
346	Glycoside hydrolase-type carbohydrate-binding protein OS=Nannochloropsis gaditana GN=Naga_100002g7 PE=4 SV=1	W7U7J1_9STRA	Naga_100002g7	36 kDa	19	-0.58	0.0001	16.12	16.07	15.92	15.96	15.31	15.51	15.44	15.45	0.1065	0.0558	-0.0904	-0.0449	-0.6873	-0.5032	-0.5605	-0.5542
347	Peptidyl-prolyl cis-trans isomerase cyclophilin type OS=Nannochloropsis gaditana GN=Naga_100022g9 PE=4 SV=1	W7TUF7_9STRA	Naga_100022g9	62 kDa	20	0.2	0.0001	17.23	17.25	17.23	17.13	17.47	17.43	17.38	17.37	0.0213	0.0381	0.017	-0.0833	0.2534	0.2192	0.1706	0.1677
348	Arginase OS=Nannochloropsis gaditana GN=Naga_100027g42 PE=3 SV=1	W7TKG8_9STRA	Naga_100027g42	40 kDa	8	0.37	0.0001	15.53	15.66	15.74	15.58	16.08	16.15	15.92	15.9	-0.1079	0.0234	0.1005	-0.0616	0.4428	0.5142	0.2839	0.2679
349	Small subunit ribosomal protein S3e OS=Nannochloropsis gaditana (strain CCMP526) GN=RP-S3E PE=4 SV=1	K8YS14_NANGC (+1)	RP-S3E	27 kDa	75	-0.18	0.0001	16.84	16.93	16.88	16.87	16.56	16.79	16.76	16.69	-0.051	0.0398	0.0024	-0.0122	-0.3298	-0.1043	-0.1275	-0.1991
350	Cytochrome c biogenesis protein CcsA OS=Nannochloropsis gaditana GN=ccsA PE=3 SV=1	A0A023PK38_9STRA (+2)	ccsA	34 kDa	3	-0.67	0.0001	16.52	16.62	16.45	16.48	15.89	16	15.85	15.63	0.0074	0.1044	-0.0628	-0.0359	-0.619	-0.5057	-0.6724	-0.8837
351	D-3-phosphoglycerate dehydrogenase OS=Nannochloropsis gaditana GN=PGDH PE=4 SV=1	W7T1C1_9STRA	PGDH	52 kDa	17	0.34	0.0001	16.88	16.73	16.71	16.72	17.05	17.01	17.25	17.08	0.1252	-0.0242	-0.0436	-0.0409	0.2872	0.2519	0.4982	0.3226
352	Saccharopine dehydrogenase OS=Nannochloropsis gaditana GN=Naga_100097g18 PE=4 SV=1	W7TIL9_9STRA	Naga_100097g18	44 kDa	40	0.28	0.0001	15.38	15.62	15.45	15.44	15.75	15.76	15.82	15.66	-0.0882	0.1522	-0.0263	-0.0342	0.2754	0.2899	0.3481	0.1886
353	Cytochrome c oxidase subunit vb OS=Nannochloropsis gaditana GN=Naga_100001g147 PE=4 SV=1	W7TKL4_9STRA	Naga_100001g147	29 kDa	21	0.35	0.0001	16	15.98	15.89	15.87	16.26	16.21	16.34	16.34	0.0517	0.0335	-0.0537	-0.0684	0.3282	0.2734	0.3978	0.4037
354	Glutathione s-transferase OS=Nannochloropsis gaditana GN=GST PE=4 SV=1	W7TMQ1_9STRA	GST	45 kDa	18	-0.26	0.0001	16.74	16.49	16.64	16.56	16.34	16.18	16.42	16.39	0.1225	-0.1108	0.0341	-0.0414	-0.2658	-0.4244	-0.1856	-0.2126
355	3-oxoacyl-[acyl-carrier-protein] synthase OS=Nannochloropsis gaditana GN=Naga_100002g173 PE=3 SV=1	W7TRD5_9STRA	Naga_100002g173	48 kDa	29	-0.32	0.0001	16.7	16.8	16.66	16.71	16.41	16.43	16.26	16.52	-0.0181	0.08	-0.053	-0.0039	-0.3108	-0.2987	-0.4528	-0.1907
356	Beta-ketoacyl-CoA thiolase OS=Nannochloropsis gaditana (strain CCMP526) GN=KCT2 PE=3 SV=1	K8Z685_NANGC (+1)	KCT2	42 kDa	21	0.31	0.0001	17.03	17.06	17	17.04	17.32	17.33	17.37	17.33	-0.0179	0.0384	-0.0286	0.0077	0.2858	0.2967	0.328	0.2958
357	Glutathione peroxidase OS=Nannochloropsis gaditana (strain CCMP526) GN=NGA_0210200 PE=4 SV=1	K8YVS0_NANGC (+1)	NGA_0210200	38 kDa	12	0.38	0.0001	15.69	15.73	15.68	15.7	16.21	15.96	16.18	15.98	-0.0179	0.0268	-0.0149	0.0051	0.5001	0.2662	0.4819	0.2729
358	Succinate dehydrogenase [ubiquinone] iron-sulfur subunit, mitochondrial OS=Nannochloropsis gaditana GN=Naga_100305g3 PE=3 SV=1	W7U0Z2_9STRA	Naga_100305g3	32 kDa	10	0.32	0.0001	17.09	17.15	17.17	17.03	17.32	17.34	17.59	17.46	-0.0135	0.0396	0.0562	-0.0879	0.2177	0.2112	0.4803	0.3469
359	Rab18-family small gtpase (Fragment) OS=Nannochloropsis gaditana (strain CCMP526) GN=NGA_0168102 PE=4 SV=1	K8ZAC9_NANGC (+1)	NGA_0168102	28 kDa	7	0.53	0.0001	16.05	16.13	16.09	16.11	16.62	16.63	16.66	16.61	-0.0469	0.032	-0.0064	0.0123	0.5132	0.5069	0.5548	0.5095
360	Nad-dependent epimerase dehydratase OS=Nannochloropsis gaditana GN=Naga_100047g30 PE=4 SV=1	W7TLE5_9STRA	Naga_100047g30	33 kDa	7	0.53	0.0001	16.97	16.98	17.07	16.91	17.4	17.47	17.51	17.64	0	-0.0036	0.1061	-0.068	0.4133	0.4865	0.524	0.6601
361	Peroxiredoxin 5, atypical 2-Cys peroxiredoxin OS=Nannochloropsis gaditana (strain CCMP526) GN=PRDX5 PE=4 SV=1	K8YWQ3_NANGC (+1)	PRDX5	17 kDa	23	0.3	0.0001	16.71	16.94	16.73	16.68	17.12	17.02	17.09	17.02	-0.0504	0.1824	-0.0298	-0.0957	0.3507	0.2563	0.3231	0.252
362	Carbonyl reductase OS=Nannochloropsis gaditana GN=Naga_100208g6 PE=3 SV=1	W7T5T2_9STRA	Naga_100208g6	36 kDa	10	0.25	0.0001	14.89	15.07	15.04	14.95	15.23	15.3	15.17	15.29	-0.0985	0.0786	0.058	-0.0303	0.2369	0.3107	0.1788	0.3015
363	Glycerol-3-phosphate dehydrogenase OS=Nannochloropsis gaditana (strain CCMP526) GN=G3PDH PE=3 SV=1	K8YW98_NANGC (+1)	G3PDH	71 kDa	14	0.33	0.0001	16.88	16.69	16.81	16.92	17.14	17.04	17.23	17.22	0.0485	-0.1467	-0.029	0.097	0.3117	0.2136	0.3946	0.3943
364	DNA-binding SAP OS=Nannochloropsis gaditana GN=Naga_100075g11 PE=4 SV=1	W7TKR7_9STRA	Naga_100075g11	57 kDa	9	0.45	0.0001	15.3	15.27	15.42	15.36	15.84	15.7	15.76	15.86	-0.0467	-0.0856	0.0843	0.0225	0.5025	0.3547	0.411	0.53
365	Uncharacterized protein OS=Nannochloropsis gaditana GN=Naga_100561g2 PE=4 SV=1	W7TPS0_9STRA	Naga_100561g2	38 kDa	23	0.55	0.0001	15.67	15.88	16.15	16.2	16.49	16.16	16.79	17.05	-0.3353	-0.1247	0.1489	0.1942	0.448	0.1656	0.7584	1.0453
366	60s ribosomal protein l18a OS=Nannochloropsis gaditana GN=Naga_100034g18 PE=3 SV=1	W7TKT1_9STRA	Naga_100034g18	32 kDa	39	-0.22	0.0001	16.83	16.76	16.8	16.76	16.44	16.6	16.63	16.53	0.0297	-0.0216	0.0062	-0.0245	-0.3605	-0.1867	-0.1585	-0.2623
367	Short-chain dehydrogenase reductase acting with nad or nadp as acceptor OS=Nannochloropsis gaditana GN=Naga_100005g68 PE=4 SV=1	W7TYC1_9STRA	Naga_100005g68	36 kDa	34	-0.25	0.0001	16.63	16.51	16.6	16.62	16.32	16.27	16.4	16.36	0.0616	-0.0773	0.0141	0.0457	-0.2736	-0.3246	-0.1887	-0.2239
368	Alpha beta hydrolase OS=Nannochloropsis gaditana GN=Naga_100001g31 PE=4 SV=1	W7U187_9STRA	Naga_100001g31	40 kDa	5	-0.32	0.0001	15.06	14.98	15.05	15.11	14.6	14.77	14.84	14.71	0.0053	-0.074	-0.0031	0.0515	-0.4596	-0.278	-0.2078	-0.3363
369	Uncharacterized protein OS=Nannochloropsis gaditana (strain CCMP526) GN=NGA_0661400 PE=4 SV=1	K8Z4L2_NANGC (+1)	NGA_0661400	32 kDa	32	0.47	0.0001	14.83	15.43	15.18	15.41	15.58	15.49	15.76	16.09	-0.4396	0.2053	-0.0604	0.1615	0.336	0.2505	0.5009	0.8589
370	Actin related protein OS=Nannochloropsis gaditana GN=Naga_100080g24 PE=3 SV=1	W7TUS4_9STRA	Naga_100080g24	48 kDa	9	0.27	0.0001	15.6	15.59	15.66	15.58	15.93	15.91	15.88	15.82	-0.0106	-0.0204	0.0477	-0.0229	0.3261	0.2929	0.2679	0.2118
371	Ribosomal protein L15 OS=Nannochloropsis gaditana GN=Naga_100099g18 PE=3 SV=1	W7U484_9STRA	Naga_100099g18	24 kDa	29	-0.26	0.0001	15.75	15.84	15.77	15.83	15.47	15.76	15.57	15.32	-0.0427	0.0439	-0.0216	0.0296	-0.3279	-0.0424	-0.2282	-0.4903
372	Uncharacterized protein OS=Nannochloropsis gaditana (strain CCMP526) GN=NGA_0501300 PE=4 SV=1	K8ZAE0_NANGC (+1)	NGA_0501300	32 kDa	10	-0.23	0.0001	16.38	16.22	16.29	16.17	16.07	16.08	16.03	15.95	0.1305	-0.0404	0.02	-0.0856	-0.195	-0.1915	-0.2311	-0.3146
373	EF-Hand 1, calcium-binding site OS=Nannochloropsis gaditana GN=Naga_100142g3 PE=4 SV=1	W7TRW6_9STRA	Naga_100142g3	64 kDa	4	1.11	0.0001	15.72	15.86	15.78	15.7	16.92	16.65	17	16.87	-0.0422	0.0974	0.02	-0.06	1.1156	0.9125	1.1921	1.0783
374	Mitochondrial protein translocase family OS=Nannochloropsis gaditana GN=Naga_100124g12 PE=4 SV=1	W7TU84_9STRA	Naga_100124g12	39 kDa	16	0.28	0.0001	15.08	15.18	15.28	15.27	15.43	15.42	15.54	15.52	-0.1386	-0.0344	0.071	0.0559	0.2327	0.225	0.3359	0.3175
375	Nhl repeat containing protein 2 OS=Nannochloropsis gaditana GN=Naga_100040g45 PE=4 SV=1	W7TUQ6_9STRA	Naga_100040g45	83 kDa	29	0.19	0.0001	16.09	16.14	16.3	16.29	16.37	16.29	16.5	16.47	-0.1187	-0.0644	0.0905	0.0832	0.1626	0.0828	0.2902	0.2587
376	Large subunit ribosomal protein L6e OS=Nannochloropsis gaditana (strain CCMP526) GN=RP-L6E PE=4 SV=1	K8YTZ6_NANGC	RP-L6E	25 kDa	50	-0.33	0.0001	17.55	17.65	17.57	17.7	17.14	17.35	17.41	17.23	-0.0757	0.0379	-0.0427	0.0836	-0.4818	-0.2758	-0.2057	-0.3997
377	Large subunit ribosomal protein L27e OS=Nannochloropsis gaditana (strain CCMP526) GN=RP-L27E PE=4 SV=1	K8YWW8_NANGC (+1)	RP-L27E	16 kDa	35	-0.22	0.0001	16.79	16.76	16.72	16.79	16.57	16.56	16.61	16.43	0.0312	0.0039	-0.0407	0.0288	-0.1886	-0.2079	-0.1515	-0.3361
378	Gtp cyclohydrolase ii OS=Nannochloropsis gaditana GN=Naga_100250g5 PE=4 SV=1	W7T706_9STRA	Naga_100250g5	61 kDa	16	0.27	0.0001	16.47	16.5	16.51	16.46	16.82	16.7	16.74	16.75	-0.0196	0.0098	0.0172	-0.0277	0.3418	0.2101	0.2596	0.253
379	Xanthine dehydrogenase OS=Nannochloropsis gaditana GN=Naga_100208g3 PE=4 SV=1	W7TFQ7_9STRA	Naga_100208g3	158 kDa	38	-0.27	0.0001	15.73	15.73	15.61	15.76	15.47	15.49	15.44	15.32	0.013	0.0232	-0.0987	0.0434	-0.2465	-0.2239	-0.2736	-0.3801
380	Uncharacterized protein (Fragment) OS=Nannochloropsis gaditana GN=Naga_101529g1 PE=4 SV=1	W7T9G7_9STRA	Naga_101529g1	43 kDa	13	0.5	0.0001	17.1	17.49	17.79	17.94	17.73	17.91	18.6	18.67	-0.55	-0.1576	0.1445	0.2929	0.0898	0.2703	0.9312	1.0092
381	Beta-1,3-glucan-binding protein OS=Nannochloropsis gaditana GN=gp40-2 PE=4 SV=1	W7TRJ0_9STRA	gp40-2	57 kDa	14	0.36	0.0001	15.39	15.56	15.53	15.47	15.83	15.83	15.95	15.77	-0.0999	0.0747	0.0442	-0.0177	0.3375	0.3412	0.4604	0.287
382	Aminotransferase class-iii OS=Nannochloropsis gaditana GN=Naga_100002g26 PE=3 SV=1	W7TZA5_9STRA	Naga_100002g26	53 kDa	20	0.39	0.0001	16.73	16.77	16.71	16.66	16.99	17.37	17.12	17.03	0.0015	0.054	-0.0126	-0.0581	0.2766	0.6326	0.4005	0.3195
383	Peptidase OS=Nannochloropsis gaditana GN=Naga_100023g41 PE=4 SV=1	W7TGJ3_9STRA	Naga_100023g41	85 kDa	6	0.44	0.0001	16.78	16.81	17.05	16.96	17.28	17.27	17.51	17.34	-0.1505	-0.1063	0.1386	0.0409	0.3642	0.3778	0.602	0.4256
384	Ribosomal protein L4 domain protein OS=Nannochloropsis gaditana GN=Naga_100032g40 PE=4 SV=1	W7THF5_9STRA	Naga_100032g40	42 kDa	93	-0.15	0.0001	16.88	16.79	16.81	16.88	16.64	16.69	16.76	16.66	0.0406	-0.0506	-0.0253	0.0443	-0.2035	-0.158	-0.0858	-0.1895
385	Uncharacterized protein OS=Nannochloropsis gaditana GN=Naga_100347g3 PE=4 SV=1	W7TRZ4_9STRA	Naga_100347g3	26 kDa	8	0.32	0.0001	16.29	16.36	16.32	16.21	16.62	16.63	16.58	16.63	-0.0075	0.0637	0.0362	-0.0928	0.3341	0.3402	0.2849	0.3319
386	Developmentally regulated gtp binding protein 1 OS=Nannochloropsis gaditana GN=Naga_100030g52 PE=4 SV=1	W7TBM7_9STRA	Naga_100030g52	53 kDa	8	0.34	0.0001	15.53	15.59	15.81	15.83	16.06	15.93	16.08	16.06	-0.1552	-0.0962	0.1185	0.1346	0.3675	0.242	0.3904	0.3646
387	Violaxanthin de-epoxidase-related protein OS=Nannochloropsis gaditana (strain CCMP526) GN=NGA_0218910 PE=4 SV=1	K8Z868_NANGC (+1)	NGA_0218910	75 kDa	5	0.4	0.0001	15.71	15.72	15.92	15.83	16.09	16.2	16.23	16.28	-0.0906	-0.0873	0.118	0.0277	0.2819	0.3917	0.4155	0.4703
388	Ammonium transporter OS=Nannochloropsis gaditana GN=Naga_100099g15 PE=3 SV=1	W7U477_9STRA	Naga_100099g15	58 kDa	22	1	0.0001	17.58	17.3	17.43	17.27	18.47	18.51	18.47	18.13	0.1937	-0.0902	0.0414	-0.1235	1.0429	1.1051	1.0393	0.7276
389	Protein atypical group OS=Nannochloropsis gaditana (strain CCMP526) GN=NGA_0208100 PE=4 SV=1	K8YTT3_NANGC	NGA_0208100	53 kDa	10	-0.52	0.0001	16.4	16.32	16.38	16.34	15.79	15.79	15.91	15.87	0.0388	-0.0458	0.0265	-0.0126	-0.5745	-0.5456	-0.4598	-0.4755
390	Glutaryl-mitochondrial OS=Nannochloropsis gaditana GN=Naga_100027g14 PE=3 SV=1	W7TTQ4_9STRA	Naga_100027g14	48 kDa	5	0.74	0.0001	16.71	16.8	16.82	16.83	17.4	17.58	17.54	17.6	-0.0801	0.0099	0.0265	0.0417	0.6147	0.8358	0.758	0.8074
391	Hydroxyacyl-coenzyme a mitochondrial OS=Nannochloropsis gaditana GN=Naga_100078g17 PE=4 SV=1	W7U0Z0_9STRA	Naga_100078g17	40 kDa	11	0.45	0.0001	16.57	16.58	16.45	16.49	17.13	16.92	16.95	16.94	0.0453	0.0342	-0.0838	-0.0533	0.5961	0.3931	0.4288	0.4076
392	Phosphomannomutase OS=Nannochloropsis gaditana GN=Naga_100096g21 PE=3 SV=1	W7UAZ9_9STRA	Naga_100096g21	35 kDa	14	0.3	0.0001	17.03	17.03	16.84	16.91	17.36	17.25	17.21	17.15	0.0714	0.0851	-0.1122	-0.0376	0.4096	0.3009	0.2514	0.194
393	Uncharacterized protein OS=Nannochloropsis gaditana GN=Naga_100042g35 PE=4 SV=1	W7U0V4_9STRA	Naga_100042g35	67 kDa	10	0.38	0.0001	15.22	15.24	15.4	15.27	15.62	15.65	15.78	15.6	-0.0741	-0.0489	0.1137	-0.0125	0.3433	0.3757	0.4979	0.3213
394	50s ribosomal protein l17 OS=Nannochloropsis gaditana GN=Naga_100504g2 PE=3 SV=1	W7TNG7_9STRA	Naga_100504g2	24 kDa	19	-0.52	0.0001	17.46	17.1	17.31	17.16	16.8	16.77	16.66	16.61	0.2129	-0.14	0.076	-0.0812	-0.4359	-0.4377	-0.5739	-0.6259
395	Choline dehydrogenase OS=Nannochloropsis gaditana GN=Naga_100099g13 PE=4 SV=1	W7TN63_9STRA	Naga_100099g13	139 kDa	66	-0.2	0.0001	15.88	15.86	15.92	15.89	15.66	15.66	15.71	15.7	-0.0057	-0.0364	0.0267	0.0039	-0.2303	-0.2194	-0.1721	-0.1879
396	RNA helicase, DEAD-box type OS=Nannochloropsis gaditana GN=Naga_100082g22 PE=4 SV=1	W7TAA3_9STRA	Naga_100082g22	75 kDa	20	0.3	0.0001	15.68	15.73	15.95	15.96	16.07	16.12	16.13	16.19	-0.1581	-0.1133	0.11	0.1314	0.2414	0.2938	0.3011	0.3561
397	Uncharacterized protein OS=Nannochloropsis gaditana GN=Naga_100009g88 PE=4 SV=1	W7TNA9_9STRA	Naga_100009g88	29 kDa	5	0.29	0.0001	15.33	15.27	15.34	15.32	15.61	15.47	15.68	15.62	0.0049	-0.0469	0.0283	0.0095	0.2962	0.1492	0.3608	0.3031
398	Uncharacterized protein OS=Nannochloropsis gaditana (strain CCMP526) GN=NGA_0721300 PE=4 SV=1	K8YX11_NANGC (+2)	NGA_0721300	20 kDa	5	0.69	0.0001	13.68	13.94	13.65	13.88	14.41	14.3	14.48	14.78	-0.1001	0.1464	-0.1319	0.0845	0.6138	0.5086	0.726	0.9906
399	Uncharacterized protein OS=Nannochloropsis gaditana (strain CCMP526) GN=NGA_0024902 PE=4 SV=1	K8Z8V6_NANGC	NGA_0024902	24 kDa	13	0.67	0.0001	15.56	15.76	15.86	16.13	16.52	16.02	16.85	16.67	-0.2577	-0.066	0.0359	0.3041	0.6793	0.2102	1.0126	0.8285
400	Uncharacterized protein OS=Nannochloropsis gaditana GN=Naga_100016g75 PE=4 SV=1	W7TNM8_9STRA	Naga_100016g75	101 kDa	47	-0.22	0.0001	15.98	15.83	15.98	15.99	15.74	15.66	15.8	15.72	0.04	-0.1085	0.0255	0.0468	-0.2059	-0.2888	-0.1403	-0.2295
401	Short chain dehydrogenase OS=Nannochloropsis gaditana (strain CCMP526) GN=NGA_0114901 PE=4 SV=1	K8Z7C4_NANGC (+1)	NGA_0114901	27 kDa	3	0.51	0.0001	14.78	14.58	14.73	14.7	15.25	15.09	15.27	15.24	0.0753	-0.1311	0.0291	0.0008	0.5477	0.3851	0.5625	0.5381
402	Indole-3-glycerol phosphate synthase (Fragment) OS=Nannochloropsis gaditana (strain CCMP526) GN=NGATSA_3011200 PE=2 SV=1	I2CQX4_NANGC (+1)	NGATSA_3011200	45 kDa	12	-0.31	0.0001	16.93	16.95	16.78	16.78	16.61	16.59	16.44	16.54	0.0702	0.0925	-0.0781	-0.0788	-0.2513	-0.2752	-0.4201	-0.3158
403	Hydroxyacylglutathione mitochondrial OS=Nannochloropsis gaditana GN=Naga_100994g1 PE=3 SV=1	W7TSB8_9STRA (+1)	Naga_100994g1	39 kDa	10	0.35	0.0001	15.9	16.18	15.99	15.98	16.3	16.44	16.29	16.44	-0.1115	0.1721	-0.0189	-0.0336	0.2822	0.4328	0.2749	0.4285
404	Beta adaptin OS=Nannochloropsis gaditana GN=Naga_100159g15 PE=4 SV=1	W7T4D8_9STRA	Naga_100159g15	135 kDa	8	0.33	0.0001	15.22	15.29	15.53	15.37	15.67	15.58	15.83	15.68	-0.1468	-0.0699	0.1694	0.0127	0.3187	0.2402	0.4675	0.3277
405	Uncharacterized protein (Fragment) OS=Nannochloropsis gaditana (strain CCMP526) GN=NGATSA_3007300 PE=2 SV=1	I2CNZ0_NANGC	NGATSA_3007300	87 kDa	41	-0.22	0.0001	15.75	15.83	16.09	16	15.63	15.67	15.72	15.8	-0.1661	-0.0854	0.1745	0.0885	-0.2849	-0.2482	-0.1896	-0.1255
406	Polyribonucleotide nucleotidyltransferase OS=Nannochloropsis gaditana (strain CCMP526) GN=NGATSA_3013500 PE=2 SV=1	I2CR07_NANGC	NGATSA_3013500	91 kDa	21	-0.25	0.0001	16.28	16.33	16.47	16.44	16.11	16.05	16.19	16.18	-0.103	-0.0529	0.0892	0.0581	-0.2733	-0.3449	-0.1982	-0.2071
407	Mitochondrial carrier OS=Nannochloropsis gaditana GN=Naga_100001g155 PE=3 SV=1	W7THW4_9STRA	Naga_100001g155	30 kDa	15	0.3	0.0001	16.39	16.33	16.43	16.35	16.66	16.66	16.75	16.66	-0.0029	-0.0329	0.0595	-0.0236	0.2795	0.3083	0.3668	0.303
408	Lipolytic protein g-d-s-l family OS=Nannochloropsis gaditana GN=Naga_100343g2 PE=4 SV=1	W7T838_9STRA	Naga_100343g2	32 kDa	14	0.51	0.0001	17.28	17.05	17.3	17.52	17.89	17.41	17.97	17.96	-0.0186	-0.2555	-0.0017	0.2175	0.5869	0.1093	0.6573	0.6706
409	Nucleolar protein 56 OS=Nannochloropsis gaditana (strain CCMP526) GN=NOP56 PE=4 SV=1	K8YRG6_NANGC	NOP56	35 kDa	23	0.31	0.0001	16.09	16.06	16.32	16.24	16.46	16.45	16.59	16.5	-0.093	-0.1305	0.1311	0.0599	0.272	0.2578	0.3887	0.2984
410	40S ribosomal protein S4 OS=Nannochloropsis gaditana GN=Naga_100106g2 PE=3 SV=1	W7TUQ1_9STRA	Naga_100106g2	30 kDa	58	-0.17	0.0001	16.87	16.98	17.03	16.94	16.65	16.84	16.89	16.76	-0.0932	0.016	0.0729	-0.0204	-0.3153	-0.1227	-0.0685	-0.2065
411	Uncharacterized protein OS=Nannochloropsis gaditana GN=Naga_100067g14 PE=4 SV=1	W7TFW5_9STRA	Naga_100067g14	42 kDa	31	-0.26	0.0001	17.2	16.88	16.99	16.96	17.02	16.52	16.78	16.55	0.1969	-0.1159	-0.0013	-0.0406	0.0162	-0.4858	-0.2266	-0.4556
412	D-aminoacid aminotransferase-like plp-dependent enzyme-like protein OS=Nannochloropsis gaditana GN=Naga_100087g20 PE=3 SV=1	W7TQE6_9STRA	Naga_100087g20	40 kDa	7	-0.5	0.0001	17.16	17.11	17.14	17.16	16.53	16.63	16.6	16.78	0.0093	-0.0466	-0.0044	0.018	-0.6101	-0.5179	-0.5382	-0.3659
413	Thioredoxin m OS=Nannochloropsis gaditana GN=Naga_100010g21 PE=4 SV=1	W7TM82_9STRA	Naga_100010g21	19 kDa	15	0.29	0.0001	15.8	15.96	15.78	15.86	16.11	16.1	16.22	16.12	-0.0545	0.1013	-0.0651	0.0112	0.2697	0.2482	0.3634	0.2776
414	Dna topoisomerase i OS=Nannochloropsis gaditana GN=Naga_100059g30 PE=4 SV=1	W7U3X4_9STRA	Naga_100059g30	83 kDa	3	0.59	0.0001	16.85	17.19	17.35	17.12	17.66	17.65	17.92	17.67	-0.292	0.0466	0.2134	-0.0154	0.5246	0.5133	0.7817	0.5253
415	V-type H+-transporting ATPase 54 kD subunit OS=Nannochloropsis gaditana (strain CCMP526) GN=NGATSA_3039200 PE=2 SV=1	I2CP76_NANGC	NGATSA_3039200	49 kDa	35	0.29	0.0001	16.56	16.42	16.43	16.34	16.73	16.68	16.78	16.7	0.1302	-0.0178	-0.0164	-0.1043	0.2984	0.2475	0.3393	0.264
416	Translocation protein SEC62 OS=Nannochloropsis gaditana (strain CCMP526) GN=NGATSA_3004700 PE=2 SV=1	I2CPB5_NANGC	NGATSA_3004700	41 kDa	9	-0.4	0.0001	16.16	16.17	16.2	16.14	15.67	15.83	15.81	15.75	-0.0111	0.0084	0.04	-0.0208	-0.491	-0.326	-0.3569	-0.4149
417	Sec14p-like phosphatidylinositol transfer family protein OS=Nannochloropsis gaditana (strain CCMP526) GN=NGA_0408310 PE=4 SV=1	K8YSK8_NANGC	NGA_0408310	98 kDa	6	0.35	0.0001	16.79	17.09	17.05	16.94	17.4	17.3	17.26	17.37	-0.1825	0.1201	0.079	-0.0373	0.4192	0.3247	0.2806	0.3899
418	Haloacid dehalogenase-like hydrolase domain containing 3 OS=Nannochloropsis gaditana GN=Naga_100013g7 PE=4 SV=1	W7TTJ7_9STRA	Naga_100013g7	44 kDa	11	-0.41	0.0001	16.65	16.38	16.4	16.38	16.04	16.12	15.92	16.08	0.2285	-0.0489	-0.0373	-0.0632	-0.4128	-0.3219	-0.5193	-0.3589
419	ATP synthase CF1 delta chain OS=Nannochloropsis gaditana GN=atpD PE=4 SV=1	A0A023PL12_9STRA	atpD	27 kDa	49	-0.29	0.0001	17.36	16.99	17.12	17.02	16.95	16.74	16.87	16.66	0.2552	-0.1149	0.0201	-0.0939	-0.1525	-0.3637	-0.2376	-0.4524
420	Adp-ribosylation factor 3 OS=Nannochloropsis gaditana GN=Naga_100022g62 PE=3 SV=1	W7TR65_9STRA	Naga_100022g62	21 kDa	9	0.39	0.0001	14.49	14.51	14.64	14.47	14.92	14.87	14.95	14.93	-0.0358	-0.0249	0.1155	-0.0825	0.3916	0.3469	0.4407	0.4006
421	Uncharacterized protein OS=Nannochloropsis gaditana GN=Naga_100010g45 PE=4 SV=1	W7TUG4_9STRA	Naga_100010g45	27 kDa	60	-0.3	0.0001	16.45	16.31	16.34	16.42	16.2	15.93	16.05	16.14	0.0561	-0.0607	-0.0362	0.0438	-0.1843	-0.4529	-0.3329	-0.2558
422	Udp-glucose pyrophosphorylase 2 OS=Nannochloropsis gaditana GN=Naga_100013g89 PE=4 SV=1	W7UC11_9STRA	Naga_100013g89	56 kDa	24	0.23	0.0001	16.96	16.83	16.86	16.76	17.13	17.11	17.01	17.07	0.1213	-0.0157	0.0189	-0.0837	0.2881	0.2627	0.161	0.2205
423	Chromodomain-helicase-dna-binding protein 7 OS=Nannochloropsis gaditana GN=Naga_100140g5 PE=4 SV=1	W7TC43_9STRA	Naga_100140g5	305 kDa	17	0.36	0.0001	15.09	14.78	15.12	15.14	15.43	15.19	15.51	15.43	0.0565	-0.2574	0.0859	0.116	0.3973	0.1425	0.4827	0.3823
424	Rna binding motif protein 39b (Fragment) OS=Nannochloropsis gaditana (strain CCMP526) GN=NGATSA_3002700 PE=2 SV=1	I2CP96_NANGC	NGATSA_3002700	51 kDa	7	0.51	0.0001	14.57	14.98	15.07	14.9	15.61	15.29	15.49	15.3	-0.3369	0.0913	0.1666	0.0034	0.6971	0.4181	0.5852	0.3955
425	U2 small nuclear ribonucleoprotein auxiliary factor u2af OS=Nannochloropsis gaditana GN=Naga_100104g5 PE=4 SV=1	W7U4N9_9STRA	Naga_100104g5	84 kDa	10	0.53	0.0001	15.48	15.79	15.94	15.77	16.31	16.25	16.26	16.36	-0.2734	0.0367	0.1832	-0.0079	0.5382	0.4839	0.5083	0.5845
426	Rab7 family gtpase OS=Nannochloropsis gaditana GN=Naga_100051g22 PE=4 SV=1	W7T495_9STRA	Naga_100051g22	24 kDa	12	0.3	0.0001	16.29	16.2	16.25	16.25	16.57	16.47	16.64	16.49	0.0429	-0.0467	-0.0007	0.0045	0.3178	0.2283	0.3867	0.2359
427	Sec1-like family protein OS=Nannochloropsis gaditana GN=Naga_100036g38 PE=3 SV=1	W7TX74_9STRA	Naga_100036g38	69 kDa	16	0.34	0.0001	15.66	15.74	15.9	15.78	16.1	15.95	16.21	16.19	-0.1195	-0.0281	0.1226	0.0009	0.3363	0.179	0.4432	0.4307
428	Sulfite ferredoxin dependent OS=Nannochloropsis gaditana GN=Naga_100040g16 PE=4 SV=1	W7TUN3_9STRA	Naga_100040g16	73 kDa	46	-0.17	0.0001	16.9	16.86	16.73	16.76	16.61	16.8	16.6	16.55	0.0846	0.0433	-0.0783	-0.0544	-0.2075	-0.0145	-0.2177	-0.2661
429	Retinol dehydrogenase 14 OS=Nannochloropsis gaditana (strain CCMP526) GN=NGA_0456000 PE=4 SV=1	K8Z9L0_NANGC (+1)	NGA_0456000	50 kDa	8	0.28	0.0001	16.64	16.76	16.79	16.69	17.01	16.89	17.01	17.1	-0.0848	0.0294	0.071	-0.0352	0.2856	0.171	0.2864	0.3838
430	Mitochondrial-processing peptidase subunit beta OS=Nannochloropsis gaditana GN=Naga_100054g10 PE=4 SV=1	W7TFQ1_9STRA	Naga_100054g10	49 kDa	55	0.23	0.0001	16.25	16.04	16.11	16.06	16.37	16.29	16.35	16.36	0.1431	-0.0791	-0.0065	-0.0503	0.2653	0.1824	0.2369	0.2535
431	Putative mitochondrial carrier family protein yhm2 OS=Nannochloropsis gaditana GN=Naga_100148g11 PE=3 SV=1	W7TN93_9STRA	Naga_100148g11	40 kDa	6	0.65	0.0001	15.66	15.52	15.73	15.6	16.3	16.13	16.33	16.27	0.0324	-0.1122	0.0913	-0.0324	0.6936	0.5097	0.7178	0.6642
432	Uncharacterized protein OS=Nannochloropsis gaditana (strain CCMP526) GN=NGA_0714200 PE=4 SV=1	K8YX19_NANGC (+1)	NGA_0714200	15 kDa	20	0.31	0.0001	17.53	17.36	17.43	17.33	17.91	17.61	17.72	17.62	0.1305	-0.049	0.0263	-0.088	0.5023	0.2015	0.3132	0.2159
433	Ribosomal protein l14 OS=Nannochloropsis gaditana GN=Naga_100027g34 PE=4 SV=1	W7TUK8_9STRA	Naga_100027g34	22 kDa	26	-0.2	0.0001	17.7	17.57	17.69	17.58	17.27	17.51	17.56	17.37	0.082	-0.0627	0.0565	-0.0564	-0.363	-0.1287	-0.0717	-0.264
434	Vacuolar sorting protein 35 OS=Nannochloropsis gaditana (strain CCMP526) GN=NGATSA_2076300 PE=2 SV=1	I2CSG4_NANGC (+2)	NGATSA_2076300	100 kDa	19	0.27	0.0001	16.1	16.2	16.16	16.17	16.36	16.44	16.43	16.46	-0.0624	0.0372	0.002	0.0108	0.2012	0.2696	0.2647	0.2907
435	Thioredoxin-dependent peroxide reductase OS=Nannochloropsis gaditana GN=PRX2 PE=4 SV=1	W7TZN7_9STRA	PRX2	26 kDa	15	0.31	0.0001	16.18	16.17	16.26	16.28	16.46	16.51	16.62	16.56	-0.0367	-0.0469	0.0331	0.0564	0.2202	0.2827	0.4033	0.3318
436	Gtp-binding protein gb2 (Fragment) OS=Nannochloropsis gaditana (strain CCMP526) GN=NGATSA_3017200 PE=2 SV=1	I2CPV8_NANGC	NGATSA_3017200	23 kDa	5	0.4	0.0001	16.63	16.52	16.67	16.63	17.02	17.05	17.19	16.83	0.0067	-0.1039	0.0569	0.0033	0.3982	0.4443	0.5665	0.2151
437	Vesicle-associated membrane protein 7 OS=Nannochloropsis gaditana (strain CCMP526) GN=VAMP7 PE=3 SV=1	K8YSA1_NANGC (+1)	VAMP7	22 kDa	3	0.65	0.0001	13.99	14.27	14.4	14.23	14.78	14.94	14.89	14.85	-0.227	0.0417	0.1675	0.0097	0.5508	0.7151	0.6746	0.6278
438	Uncharacterized protein OS=Nannochloropsis gaditana GN=Naga_100026g25 PE=4 SV=1	W7TT12_9STRA	Naga_100026g25	125 kDa	14	0.55	0.0001	14.66	14.75	15.04	14.77	15.46	15.19	15.59	15.29	-0.1432	-0.0449	0.2343	-0.0384	0.6452	0.3746	0.7679	0.4847
439	Nadh ubiquinone OS=Nannochloropsis gaditana GN=NUO10 PE=3 SV=1	W7UBY9_9STRA	NUO10	25 kDa	10	0.28	0.0001	16.55	16.8	16.87	16.73	16.98	16.98	17.14	17.03	-0.1929	0.0585	0.1227	-0.0189	0.2361	0.247	0.3959	0.2845
440	Triosephosphate isomerase OS=Nannochloropsis gaditana (strain CCMP526) GN=TPI PE=3 SV=1	K8YW85_NANGC (+1)	TPI	29 kDa	63	0.21	0.0001	16.14	16.12	16	15.98	16.39	16.21	16.23	16.23	0.0909	0.0602	-0.0591	-0.0825	0.3332	0.1443	0.1771	0.1748
441	Peptidase s41 OS=Nannochloropsis gaditana GN=Naga_100191g3 PE=4 SV=1	W7TJE8_9STRA	Naga_100191g3	42 kDa	14	0.24	0.0001	16.48	16.51	16.47	16.44	16.7	16.74	16.72	16.71	-0.0027	0.0446	-0.0082	-0.025	0.2221	0.2668	0.2449	0.2409
442	Fyve and coiled-coil domain-containing protein 1 OS=Nannochloropsis gaditana GN=Naga_100582g1 PE=4 SV=1	W7TRH9_9STRA	Naga_100582g1	73 kDa	7	0.27	0.0001	14.97	15.04	15.15	15.15	15.29	15.36	15.3	15.46	-0.114	-0.0465	0.0655	0.0688	0.2039	0.287	0.2285	0.3601
443	Chaperone protein DnaK OS=Nannochloropsis gaditana GN=dnaK PE=3 SV=1	K9ZV06_9STRA	dnaK	66 kDa	185	-0.14	0.0001	15.98	16.12	16.09	16.14	15.94	15.94	15.91	15.97	-0.1119	0.028	0.0049	0.0613	-0.147	-0.1466	-0.1792	-0.1145
444	Photosystem I P700 chlorophyll a apoprotein A1 OS=Nannochloropsis gaditana GN=psaA PE=3 SV=1	K9ZXE3_9STRA	psaA	83 kDa	53	-0.33	0.0001	16.99	16.78	16.66	16.72	16.56	16.55	16.43	16.2	0.2095	0.0028	-0.1244	-0.059	-0.2316	-0.2298	-0.3382	-0.5755
445	Cleavage stimulation factor subunit 3 OS=Nannochloropsis gaditana GN=Naga_100077g14 PE=4 SV=1	W7T8N9_9STRA	Naga_100077g14	96 kDa	8	0.27	0.0001	15.11	15.06	15.35	15.25	15.45	15.38	15.45	15.59	-0.0898	-0.1317	0.15	0.0503	0.2591	0.1914	0.2505	0.402
446	Light-independent protochlorophyllide reductase subunit N OS=Nannochloropsis gaditana GN=chlN PE=3 SV=1	K9ZV79_9STRA (+1)	chlN	50 kDa	6	-1.15	0.0001	17.07	17	17.19	17	15.64	16.18	15.7	15.9	0.0134	-0.0635	0.1244	-0.0613	-1.3576	-0.8672	-1.2811	-1.098
447	Cluster of Uncharacterized protein OS=Nannochloropsis gaditana (strain CCMP526) GN=NGA_0477710 PE=4 SV=1 (K8ZAB7_NANGC)	K8ZAB7_NANGC [2]	NGA_0477710	98 kDa	64	-0.31	0.0001	16.05	16.24	16.2	16.11	15.87	15.81	15.83	15.86	-0.1214	0.0899	0.0522	-0.0432	-0.2635	-0.3184	-0.3152	-0.2887
448	Uncharacterized protein OS=Nannochloropsis gaditana (strain CCMP526) GN=NGA_0067902 PE=4 SV=1	K8ZC85_NANGC	NGA_0067902	62 kDa	20	-0.27	0.0001	15.31	15.26	15.25	15.27	14.98	15.05	14.95	15.01	0.0434	-0.0083	-0.0328	0.008	-0.2962	-0.2194	-0.3441	-0.2605
449	Zinc finger ccch domain-containing protein 63 OS=Nannochloropsis gaditana GN=Naga_100391g4 PE=4 SV=1	W7TV67_9STRA	Naga_100391g4	52 kDa	4	0.29	0.0001	16.48	16.6	16.66	16.71	16.83	16.84	16.98	16.98	-0.1483	-0.0141	0.039	0.0977	0.2157	0.2187	0.3632	0.3647
450	Rna-binding musashi 2-like protein (Fragment) OS=Nannochloropsis gaditana GN=Naga_100051g1 PE=4 SV=1	W7T5L8_9STRA	Naga_100051g1	32 kDa	13	0.31	0.0001	15.35	15.24	15.56	15.46	15.71	15.67	15.75	15.73	-0.0534	-0.1664	0.1498	0.0445	0.3085	0.2631	0.3408	0.3311
451	Branched-chain amino acid aminotransferase OS=Nannochloropsis gaditana (strain CCMP526) GN=ILVE PE=3 SV=1	K8Z6W3_NANGC	ILVE	38 kDa	29	-0.22	0.0001	16.04	16.08	15.94	16.04	15.73	15.92	15.78	15.78	0.0172	0.0486	-0.081	0.0135	-0.2919	-0.0996	-0.2512	-0.2336
452	Cyclin-dependent kinases regulatory subunit OS=Nannochloropsis gaditana (strain CCMP526) GN=CKS1 PE=3 SV=1	K8Z364_NANGC (+2)	CKS1	17 kDa	5	-0.34	0.0001	16.62	16.5	16.37	16.44	16.21	16.09	16.18	16.04	0.1513	0.0266	-0.1103	-0.0289	-0.2666	-0.3901	-0.3025	-0.4384
453	Ribosomal protein L7A/L8 OS=Nannochloropsis gaditana GN=Naga_100156g9 PE=4 SV=1	W7TKH1_9STRA	Naga_100156g9	29 kDa	55	-0.16	0.0001	17.45	17.34	17.31	17.35	17.26	17.21	17.26	17.05	0.0874	-0.0187	-0.0481	-0.0051	-0.1092	-0.148	-0.0916	-0.2979
454	Beta-ig-h3 fasciclin OS=Nannochloropsis gaditana GN=Naga_100967g1 PE=4 SV=1	W7TSC3_9STRA	Naga_100967g1	19 kDa	15	0.52	0.0001	16	16.98	16.17	16.59	16.97	17.04	16.99	16.94	-0.4593	0.5083	-0.3015	0.1206	0.5208	0.5832	0.5217	0.4744
455	Histone deacetylase OS=Nannochloropsis gaditana GN=Naga_100309g6 PE=4 SV=1	W7TJ08_9STRA	Naga_100309g6	100 kDa	10	0.26	0.0001	15.88	15.88	15.98	15.85	16.15	16.03	16.28	16.19	-0.0174	-0.0209	0.0814	-0.0431	0.2585	0.1271	0.3715	0.2955
456	60s ribosomal protein l9 OS=Nannochloropsis gaditana GN=Naga_100072g24 PE=4 SV=1	W7TGP7_9STRA	Naga_100072g24	22 kDa	52	-0.2	0.0001	16.83	16.79	16.82	16.8	16.53	16.73	16.69	16.44	0.0097	-0.0136	0.0112	-0.0017	-0.2745	-0.0862	-0.1168	-0.3605
457	Uncharacterized protein OS=Nannochloropsis gaditana (strain CCMP526) GN=NGA_0463700 PE=4 SV=1	K8Z6W7_NANGC (+1)	NGA_0463700	26 kDa	12	0.3	0.0001	15.79	15.53	15.68	15.66	15.97	15.88	16.1	15.93	0.1181	-0.1385	-0.0006	-0.0077	0.2989	0.1897	0.4365	0.266
458	Uncharacterized protein OS=Nannochloropsis gaditana GN=Naga_100141g6 PE=4 SV=1	W7TKD2_9STRA	Naga_100141g6	41 kDa	6	-0.39	0.0001	15.99	15.74	15.6	15.85	15.53	15.25	15.45	15.37	0.1982	-0.052	-0.1793	0.0699	-0.2523	-0.5358	-0.3497	-0.4178
459	Cytochrome p450 OS=Nannochloropsis gaditana GN=Naga_100005g26 PE=4 SV=1	W7TYI7_9STRA	Naga_100005g26	118 kDa	23	0.19	0.0001	15.18	15.46	15.34	15.35	15.41	15.51	15.63	15.54	-0.1544	0.1307	0.0063	0.0142	0.0877	0.1762	0.2946	0.2155
460	Aminoacyl-tRNA synthetase, class I, conserved site OS=Nannochloropsis gaditana GN=GTS PE=3 SV=1	W7TTC6_9STRA	GTS	65 kDa	29	-0.24	0.0001	15.9	15.89	15.84	15.86	15.63	15.54	15.72	15.64	0.0311	0.0094	-0.0313	-0.0071	-0.2563	-0.3373	-0.1597	-0.2347
461	UPF0103/Mediator of ErbB2-driven cell motility OS=Nannochloropsis gaditana GN=Naga_100038g23 PE=3 SV=1	W7U3I8_9STRA	Naga_100038g23	36 kDa	4	0.63	0.0001	15.33	15.27	15.27	15.31	16.05	15.94	15.92	15.75	0.0359	-0.0196	-0.0224	0.0058	0.7658	0.6561	0.6271	0.4597
462	60s ribosomal protein l17-2 OS=Nannochloropsis gaditana GN=Naga_100020g14 PE=3 SV=1	W7TUF4_9STRA	Naga_100020g14	20 kDa	32	-0.2	0.0001	16.79	16.73	16.71	16.77	16.44	16.6	16.61	16.53	0.0303	-0.0225	-0.0369	0.0252	-0.3136	-0.1522	-0.141	-0.2245
463	Plastid lipid-associated protein/fibrillin conserved domain protein OS=Nannochloropsis gaditana GN=Naga_100055g38 PE=4 SV=1	W7TCE0_9STRA	Naga_100055g38	34 kDa	5	0.53	0.0001	15.74	15.78	15.85	15.77	16.32	16.38	16.23	16.37	-0.0449	-0.0308	0.0673	-0.0181	0.5368	0.6012	0.4385	0.5831
464	Malate synthase OS=Nannochloropsis gaditana (strain CCMP526) GN=NGA_0373902 PE=4 SV=1	K8YYV5_NANGC	NGA_0373902	88 kDa	45	0.17	0.0001	16.3	16.58	16.34	16.38	16.4	16.71	16.63	16.57	-0.1061	0.1692	-0.0648	-0.0218	0.005	0.3064	0.2332	0.1646
465	Aldo keto reductase OS=Nannochloropsis gaditana (strain CCMP526) GN=NGA_0390600 PE=4 SV=1	K8YRH3_NANGC	NGA_0390600	52 kDa	11	0.2	0.0001	15.28	15.44	15.38	15.31	15.48	15.6	15.48	15.65	-0.075	0.0818	0.0199	-0.0496	0.1251	0.2471	0.1245	0.298
466	Citrate lyase beta subunit OS=Nannochloropsis gaditana GN=citE PE=4 SV=1	W7T1J4_9STRA	citE	16 kDa	8	0.31	0.0001	15.97	16.01	16.05	16.08	16.41	16.24	16.38	16.31	-0.0663	-0.0192	0.0197	0.0489	0.3837	0.2117	0.3549	0.2779
467	Serine threonine-protein kinase dclk3 OS=Nannochloropsis gaditana GN=Naga_100049g18 PE=4 SV=1	W7TDL2_9STRA	Naga_100049g18	182 kDa	9	0.29	0.0001	15.06	15.14	15.29	15.24	15.4	15.67	15.38	15.49	-0.138	-0.0517	0.1004	0.052	0.2125	0.4856	0.1855	0.3075
468	rRNA 2'-O-methyltransferase fibrillarin (Fragment) OS=Nannochloropsis gaditana (strain CCMP526) GN=NGATSA_3011400 PE=2 SV=1	I2CQX8_NANGC	NGATSA_3011400	28 kDa	24	0.29	0.0001	15.87	15.66	15.99	15.99	16.1	16.14	16.3	16.16	-0.0217	-0.2334	0.1039	0.1056	0.2125	0.2649	0.4177	0.2783
469	Short-chain dehydrogenase reductase sdr OS=Nannochloropsis gaditana GN=Naga_100116g18 PE=3 SV=1	W7TWB7_9STRA	Naga_100116g18	26 kDa	10	0.48	0.0001	15.67	15.72	15.69	15.77	16.18	16.22	16.15	16.22	-0.0424	0.006	-0.0351	0.0521	0.4688	0.5042	0.4358	0.5038
470	40s ribosomal protein s13 OS=Nannochloropsis gaditana GN=Naga_100638g4 PE=3 SV=1	W7T973_9STRA	Naga_100638g4	18 kDa	32	-0.23	0.0001	17.15	17.21	17.26	17.31	16.88	17.05	17.13	16.92	-0.0841	-0.034	0.0268	0.0664	-0.3796	-0.1894	-0.1015	-0.3324
471	Uncharacterized protein OS=Nannochloropsis gaditana GN=Naga_100003g91 PE=4 SV=1	W7UBU9_9STRA	Naga_100003g91	45 kDa	3	0.44	0.0001	16.05	15.96	16.19	16.04	16.44	16.41	16.63	16.56	-0.0197	-0.1017	0.1286	-0.019	0.3796	0.3416	0.5661	0.5
472	Glycerol-3-phosphate o-acyltransferase OS=Nannochloropsis gaditana GN=Naga_100106g21 PE=4 SV=1	W7TUN5_9STRA	Naga_100106g21	82 kDa	21	-0.18	0.0001	16.89	16.84	16.87	16.89	16.69	16.7	16.74	16.61	0.0222	-0.0315	-0.0025	0.0129	-0.1789	-0.1697	-0.1327	-0.2542
473	NADH dehydrogenase (Ubiquinone) Fe-S protein 8 OS=Nannochloropsis gaditana (strain CCMP526) GN=NDUFS8 PE=3 SV=1	K8YZI9_NANGC (+1)	NDUFS8	25 kDa	17	0.22	0.0001	15.99	15.98	16.05	15.97	16.18	16.19	16.26	16.24	-0.0112	-0.0144	0.0533	-0.0244	0.1923	0.1964	0.2643	0.25
474	Nadh-cytochrome b5 reductase 2 OS=Nannochloropsis gaditana GN=Naga_100001g27 PE=4 SV=1	W7U242_9STRA	Naga_100001g27	53 kDa	15	0.23	0.0001	16.74	16.66	16.77	16.79	16.96	16.87	17	17.02	-0.0093	-0.0766	0.024	0.0534	0.2147	0.1349	0.2563	0.2831
475	Uncharacterized protein OS=Nannochloropsis gaditana GN=Naga_100443g2 PE=4 SV=1	W7U7X9_9STRA	Naga_100443g2	154 kDa	10	0.35	0.0001	14.66	14.82	14.98	14.82	15.25	15.13	15.11	15.25	-0.1748	-0.0185	0.1419	-0.0127	0.4283	0.3066	0.2974	0.4343
476	Uncharacterized protein (Fragment) OS=Nannochloropsis gaditana (strain CCMP526) GN=NGA_2085600 PE=4 SV=1	K8YYE6_NANGC	NGA_2085600	20 kDa	6	-0.92	0.0001	16.63	16.48	16.57	16.35	15.56	15.72	15.33	15.58	0.1398	0.0094	0.0966	-0.1304	-0.9137	-0.7836	-1.1716	-0.9336
477	Acetolactate synthase OS=Nannochloropsis gaditana GN=ilvB PE=3 SV=1	A0A023PK86_9STRA	ilvB	66 kDa	21	-0.26	0.0001	15.74	15.7	15.69	15.6	15.38	15.46	15.47	15.35	0.0716	0.0147	0.006	-0.0776	-0.306	-0.24	-0.2108	-0.3321
478	Uncharacterized protein OS=Nannochloropsis gaditana GN=Naga_100002g42 PE=4 SV=1	W7U7G1_9STRA	Naga_100002g42	91 kDa	82	-0.17	0.0001	16.54	16.42	16.72	16.67	16.48	16.35	16.39	16.46	-0.0541	-0.1746	0.1287	0.0915	-0.118	-0.2415	-0.2047	-0.1313
479	60s ribosomal protein l21-a OS=Nannochloropsis gaditana GN=Naga_100638g3 PE=4 SV=1	W7TSR6_9STRA	Naga_100638g3	19 kDa	35	-0.23	0.0001	17.28	17.51	17.49	17.43	17.08	17.24	17.3	17.2	-0.1526	0.0691	0.0532	-0.0073	-0.3678	-0.1917	-0.1351	-0.2385
480	Peptidase OS=Nannochloropsis gaditana GN=Naga_100007g94 PE=4 SV=1	W7TSP2_9STRA	Naga_100007g94	55 kDa	10	0.37	0.0001	14.64	14.5	14.53	14.51	14.9	15.01	14.87	14.82	0.1207	-0.0378	-0.0121	-0.0291	0.3597	0.4818	0.3296	0.2934
481	NAD(P)H nitrate reductase OS=Nannochloropsis gaditana (strain CCMP526) GN=NIRB PE=4 SV=1	K8YSU6_NANGC	NIRB	63 kDa	6	-1.48	0.0001	17.62	17.34	17.38	17.54	16.04	15.81	16.15	16.03	0.1793	-0.1125	-0.0603	0.0911	-1.3751	-1.6039	-1.2245	-1.3957
482	Uncharacterized protein OS=Nannochloropsis gaditana (strain CCMP526) GN=NGA_0605600 PE=4 SV=1	K8YQ38_NANGC (+1)	NGA_0605600	42 kDa	62	-0.16	0.0001	16.95	16.9	17.2	17.27	16.96	16.7	16.98	16.99	-0.1218	-0.1848	0.1242	0.1861	-0.1144	-0.3748	-0.104	-0.0819
483	Light harvesting complex protein OS=Nannochloropsis gaditana (strain CCMP526) GN=NGA_0645400 PE=4 SV=1	K8YPR7_NANGC	NGA_0645400	19 kDa	10	0.85	0.0001	13.81	14.89	14.21	14.53	15.27	15.21	15.19	15.32	-0.5791	0.4941	-0.1907	0.1325	0.8816	0.8498	0.7923	0.9292
484	Tryptophan synthetase OS=Nannochloropsis gaditana GN=Naga_100155g8 PE=3 SV=1	W7TQB9_9STRA	Naga_100155g8	79 kDa	39	-0.24	0.0001	16.82	16.96	16.94	16.96	16.69	16.74	16.65	16.65	-0.1092	0.0431	0.0128	0.0328	-0.2271	-0.181	-0.2737	-0.2637
485	Alanine aminotransferase OS=Nannochloropsis gaditana GN=Naga_100127g11 PE=4 SV=1	W7TLR3_9STRA	Naga_100127g11	63 kDa	17	0.27	0.0001	16.22	16.25	16.29	16.28	16.52	16.43	16.66	16.53	-0.0492	-0.0175	0.0291	0.0232	0.2534	0.1683	0.3889	0.2632
486	Vacuolar protein sorting protein OS=Nannochloropsis gaditana GN=Naga_100161g6 PE=4 SV=1	W7TUA0_9STRA	Naga_100161g6	117 kDa	7	0.41	0.0001	15.72	15.82	16.09	16.05	16.21	16.3	16.36	16.46	-0.1982	-0.102	0.1809	0.14	0.2771	0.3651	0.447	0.547
487	Thiamine biosynthesis ThiG OS=Nannochloropsis gaditana (strain CCMP526) GN=NGATSA_2046800 PE=2 SV=1	I2CPE8_NANGC (+1)	NGATSA_2046800	29 kDa	12	-0.48	0.0001	16.38	16.51	16.38	16.52	15.92	16.07	15.94	15.94	-0.0902	0.0643	-0.0698	0.0728	-0.5373	-0.3852	-0.5036	-0.5066
488	Glycosyl hydrolase family 1 OS=Nannochloropsis gaditana GN=Naga_100069g10 PE=3 SV=1	W7TNI3_9STRA	Naga_100069g10	77 kDa	17	0.37	0.0001	16.54	16.48	16.49	16.39	16.98	16.74	16.85	16.86	0.0665	0.0023	0.0029	-0.0842	0.5097	0.265	0.3681	0.3624
489	50s ribosomal protein l28 OS=Nannochloropsis gaditana GN=Naga_100115g6 PE=4 SV=1	W7U2Y2_9STRA	Naga_100115g6	15 kDa	14	-0.36	0.0001	16.99	16.81	16.72	16.76	16.51	16.37	16.51	16.33	0.1842	0.0034	-0.0879	-0.052	-0.3187	-0.432	-0.3076	-0.4887
490	Electron transfer flavoprotein-ubiquinone oxidoreductase, mitochondrial OS=Nannochloropsis gaditana GN=Naga_100029g6 PE=3 SV=1	W7TSX6_9STRA	Naga_100029g6	65 kDa	21	0.21	0.0001	15.32	15.54	15.43	15.42	15.58	15.57	15.72	15.72	-0.1146	0.1065	-0.0126	-0.02	0.1435	0.1309	0.2862	0.2797
491	Cytochrome c6 OS=Nannochloropsis gaditana (strain CCMP526) GN=NGA_0388600 PE=4 SV=1	K8YS21_NANGC (+1)	NGA_0388600	20 kDa	7	0.35	0.0001	16.81	16.8	16.59	16.61	17.18	17.08	16.99	16.98	0.1086	0.0963	-0.1157	-0.0967	0.4812	0.3701	0.2858	0.271
492	Transmembrane emp24 domain-containing protein 10 OS=Nannochloropsis gaditana GN=Naga_100190g6 PE=3 SV=1	W7TMZ8_9STRA	Naga_100190g6	27 kDa	9	0.31	0.0001	16.22	16.07	16.1	16.08	16.45	16.36	16.46	16.38	0.0951	-0.0386	-0.0141	-0.0333	0.3435	0.2494	0.3466	0.2717
493	Transketolase OS=Nannochloropsis gaditana GN=Naga_100062g4 PE=4 SV=1	W7TM64_9STRA	Naga_100062g4	77 kDa	39	0.15	0.0001	16.17	16.42	16.25	16.23	16.4	16.51	16.43	16.35	-0.0967	0.1483	-0.0216	-0.0372	0.1302	0.2372	0.1539	0.0777
494	Adp atp OS=Nannochloropsis gaditana GN=Naga_100005g52 PE=3 SV=1	W7TPN7_9STRA	Naga_100005g52	37 kDa	79	0.17	0.0001	16.83	16.7	16.78	16.83	16.98	16.88	17.09	16.87	0.0364	-0.0924	-0.0061	0.0513	0.1892	0.0946	0.2989	0.0839
495	Elongation factor 3 OS=Nannochloropsis gaditana GN=Naga_100078g15 PE=4 SV=1	W7TS20_9STRA	Naga_100078g15	59 kDa	21	0.25	0.0001	16.69	16.75	16.67	16.79	17.14	16.92	17.09	16.85	-0.0445	0.0211	-0.0633	0.062	0.4043	0.1843	0.3544	0.1198
496	Valyl-tRNA synthetase (Fragment) OS=Nannochloropsis gaditana (strain CCMP526) GN=NGATSA_3020800 PE=2 SV=1	I2CNY9_NANGC	NGATSA_3020800	99 kDa	25	0.17	0.0001	15.73	15.81	15.98	15.98	15.98	16.06	16.11	16.04	-0.1531	-0.0665	0.098	0.092	0.1012	0.1863	0.23	0.1639
497	Protease OS=Nannochloropsis gaditana (strain CCMP526) GN=NGA_0606000 PE=4 SV=1	K8Z1S7_NANGC	NGA_0606000	45 kDa	12	0.22	0.0001	15.12	15.05	15.1	15.05	15.29	15.23	15.37	15.32	0.0407	-0.026	0.0283	-0.0272	0.2016	0.1488	0.2926	0.244
498	Oligopeptidase a OS=Nannochloropsis gaditana (strain CCMP526) GN=NGATSA_3003600 PE=2 SV=1	I2CQQ3_NANGC	NGATSA_3003600	91 kDa	30	-0.26	0.0001	16.57	16.75	16.58	16.59	16.31	16.41	16.37	16.3	-0.0523	0.1269	-0.0378	-0.0225	-0.3217	-0.2024	-0.2455	-0.3153
499	Phosphoserine phosphatase OS=Nannochloropsis gaditana GN=PSP PE=4 SV=1	W7TP32_9STRA (+1)	PSP	33 kDa	8	0.44	0.0001	15.64	15.58	15.42	15.4	15.97	15.96	15.95	15.93	0.1285	0.0705	-0.0866	-0.1035	0.4958	0.4464	0.4422	0.4217
500	Tom1 protein OS=Nannochloropsis gaditana GN=Naga_100002g12 PE=4 SV=1	W7TZ69_9STRA	Naga_100002g12	46 kDa	4	0.41	0.0001	14.83	15.06	15.02	14.98	15.43	15.28	15.42	15.43	-0.1541	0.0805	0.0459	0.007	0.453	0.2963	0.44	0.4468
501	GTP:AMP phosphotransferase, mitochondrial OS=Nannochloropsis gaditana GN=Naga_100002g130 PE=3 SV=1	W7U7D5_9STRA	Naga_100002g130	25 kDa	19	0.3	0.0001	16.89	16.84	16.92	16.92	17.16	17.13	17.24	17.2	-0.0223	-0.0491	0.0358	0.0346	0.2633	0.2333	0.339	0.2982
502	Mitochondrion protein OS=Nannochloropsis gaditana (strain CCMP526) GN=NGA_0434010 PE=3 SV=1	K8ZAZ5_NANGC	NGA_0434010	73 kDa	43	0.14	0.0001	15.71	15.52	15.76	15.66	15.79	15.73	15.89	15.87	0.0426	-0.1517	0.0967	-0.0102	0.1213	0.0621	0.2201	0.2004
503	60 kDa chaperonin, chloroplastic OS=Nannochloropsis gaditana GN=groEL PE=3 SV=1	A0A023PK76_9STRA	groEL	61 kDa	14	-0.36	0.0001	16.04	15.89	15.98	15.99	15.58	15.47	15.75	15.61	0.0826	-0.0872	0.0052	0.0182	-0.3841	-0.5156	-0.2093	-0.3732
504	Uncharacterized protein OS=Nannochloropsis gaditana GN=Naga_100469g5 PE=4 SV=1	W7TZ85_9STRA	Naga_100469g5	62 kDa	12	0.59	0.0001	14.95	14.92	15.1	15.3	15.6	15.25	15.76	15.94	-0.1416	-0.1582	0.0267	0.2301	0.536	0.1812	0.6837	0.8775
505	30S ribosomal protein S20, chloroplastic OS=Nannochloropsis gaditana GN=rps20 PE=3 SV=1	K9ZX69_9STRA	rps20	11 kDa	4	-0.94	0.0001	18.12	17.61	17.81	17.88	16.88	17	16.91	16.84	0.2747	-0.2381	-0.0364	0.0317	-0.9621	-0.8431	-0.9057	-0.9864
506	Protein kinase, ATP binding site OS=Nannochloropsis gaditana GN=Naga_100007g50 PE=4 SV=1	W7U8D0_9STRA	Naga_100007g50	49 kDa	35	0.19	0.0001	16.31	16.14	16.23	16.22	16.57	16.32	16.44	16.31	0.0946	-0.0952	0.0082	-0.0065	0.3455	0.0931	0.2092	0.092
507	Er lumen protein retaining receptor (Fragment) OS=Nannochloropsis gaditana (strain CCMP526) GN=NGA_0240400 PE=4 SV=1	K8Z5S1_NANGC (+1)	NGA_0240400	32 kDa	4	-0.32	0.0001	16.61	16.47	16.46	16.4	16.16	16.21	16.31	15.98	0.1189	-0.0123	-0.0304	-0.0803	-0.3291	-0.2734	-0.1748	-0.5094
508	Transaldolase OS=Nannochloropsis gaditana GN=Naga_100017g20 PE=3 SV=1	W7U1X5_9STRA	Naga_100017g20	72 kDa	47	0.3	0.0001	15.69	15.76	15.57	15.55	16.07	15.96	15.91	15.82	0.029	0.1104	-0.0724	-0.1024	0.4234	0.3067	0.2672	0.1613
509	Glycoside (Fragment) OS=Nannochloropsis gaditana (strain CCMP526) GN=NGA_0368700 PE=4 SV=1	K8YVC7_NANGC (+1)	NGA_0368700	90 kDa	14	0.29	0.0001	15.92	16.14	16.07	16.14	16.49	16.28	16.29	16.38	-0.1562	0.0741	0.0045	0.0704	0.4189	0.1979	0.223	0.305
510	Uncharacterized protein OS=Nannochloropsis gaditana GN=Naga_100046g45 PE=4 SV=1	W7TM63_9STRA	Naga_100046g45	98 kDa	3	0.8	0.0001	15.39	15.5	15.71	15.77	16.21	16.62	16.42	16.37	-0.3379	-0.1558	0.0659	0.1345	0.5639	0.98	0.7922	0.7919
511	Membrane insertion protein, OxaA/YidC OS=Nannochloropsis gaditana GN=Alb3 PE=3 SV=1	W7TN75_9STRA	Alb3	54 kDa	8	-0.42	0.0001	17.44	17.22	17.29	17.28	16.86	16.79	17.01	16.88	0.1387	-0.0793	-0.0123	-0.0195	-0.4273	-0.5014	-0.2816	-0.4182
512	Uncharacterized protein OS=Nannochloropsis gaditana GN=Naga_100198g3 PE=4 SV=1	W7TBA4_9STRA	Naga_100198g3	42 kDa	3	0.58	0.0001	15.87	15.94	16.1	16.04	16.55	16.35	16.7	16.67	-0.1222	-0.0541	0.1055	0.0483	0.5592	0.3612	0.7182	0.6806
513	Thioredoxin reductase (NADPH) OS=Nannochloropsis gaditana (strain CCMP526) GN=NGATSA_3006400 PE=2 SV=1	I2CP09_NANGC	NGATSA_3006400	57 kDa	12	0.41	0.0001	16.73	16.99	16.73	16.77	17.26	17.27	17.25	17.12	-0.0776	0.1765	-0.0877	-0.0396	0.4396	0.4561	0.4344	0.3037
514	Dienelactone hydrolase family protein OS=Nannochloropsis gaditana GN=Naga_100032g26 PE=4 SV=1	W7TPV0_9STRA	Naga_100032g26	22 kDa	9	0.48	0.0001	14.81	14.71	14.61	14.5	15.26	15.24	15.12	14.94	0.1504	0.0572	-0.0454	-0.1522	0.5965	0.5611	0.4484	0.2948
515	Amp deaminase 2 OS=Nannochloropsis gaditana GN=Naga_100029g44 PE=4 SV=1	W7U8W7_9STRA	Naga_100029g44	98 kDa	7	0.3	0.0001	15.55	15.43	15.5	15.49	15.73	15.7	15.9	15.8	0.0726	-0.0588	0.0101	-0.0013	0.2606	0.2123	0.413	0.3121
516	Uncharacterized protein OS=Nannochloropsis gaditana GN=Naga_100003g11 PE=4 SV=1	W7UB75_9STRA	Naga_100003g11	35 kDa	42	0.26	0.0001	16.26	16.16	16.19	16.14	16.48	16.45	16.47	16.38	0.0665	-0.0173	0.0069	-0.0379	0.2847	0.2715	0.2899	0.1976
517	Wd repeat-containing protein 82 OS=Nannochloropsis gaditana GN=Naga_100056g40 PE=4 SV=1	W7TLY5_9STRA	Naga_100056g40	44 kDa	3	0.52	0.0001	14.9	15.13	15.25	15.19	15.64	15.58	15.62	15.71	-0.2124	0.0191	0.1373	0.0782	0.5285	0.469	0.5097	0.5917
518	Nad-dependent epimerase dehydratase OS=Nannochloropsis gaditana (strain CCMP526) GN=NGA_0096400 PE=4 SV=1	K8YQP9_NANGC (+1)	NGA_0096400	39 kDa	21	-0.22	0.0001	16.28	16.2	16.22	16.17	16.02	16.01	16.02	15.96	0.0579	-0.009	0.0108	-0.0402	-0.212	-0.2024	-0.2049	-0.249
519	DNA-binding SAP OS=Nannochloropsis gaditana GN=Naga_100009g92 PE=4 SV=1	W7U6U2_9STRA	Naga_100009g92	64 kDa	30	0.26	0.0001	16.74	16.6	16.61	16.53	17	16.81	16.88	16.81	0.1415	-0.0111	-0.0036	-0.0745	0.3702	0.2072	0.2663	0.1928
520	Trehalose-phosphate synthase OS=Nannochloropsis gaditana GN=Naga_100081g15 PE=4 SV=1	W7TBU1_9STRA	Naga_100081g15	121 kDa	9	0.49	0.0001	15.8	16.21	16.03	16.02	16.41	16.53	16.61	16.47	-0.2392	0.1937	-0.0052	-0.0096	0.3768	0.5027	0.5786	0.4408
521	Methyltransferase type 11 (Fragment) OS=Nannochloropsis gaditana (strain CCMP526) GN=NGA_2104000 PE=4 SV=1	K8YNB8_NANGC	NGA_2104000	36 kDa	4	0.26	0.0001	13.59	13.82	13.87	13.71	14.03	13.99	13.98	14.03	-0.1579	0.0693	0.1257	-0.0363	0.2902	0.2454	0.2283	0.2818
522	Conserved uncarachetized protein OS=Nannochloropsis gaditana GN=Naga_100063g26 PE=3 SV=1	W7TTX4_9STRA	Naga_100063g26	305 kDa	13	0.3	0.0001	14.61	14.54	14.79	14.69	14.99	14.86	14.91	15.1	-0.0457	-0.1415	0.126	0.0255	0.3251	0.2035	0.2563	0.4398
523	Stress-induced protein sti1 OS=Nannochloropsis gaditana GN=Naga_100073g12 PE=4 SV=1	W7TJK4_9STRA	Naga_100073g12	63 kDa	37	-0.21	0.0001	16.46	16.25	16.35	16.37	16.19	16.15	16.09	16.15	0.1038	-0.1117	-0.0083	0.0141	-0.1624	-0.2089	-0.267	-0.1926
524	Superoxide dismutase OS=Nannochloropsis gaditana GN=Fe PE=3 SV=1	W7T7U7_9STRA	Fe	21 kDa	9	0.46	0.0001	16.81	16.71	16.61	16.53	17.26	17.08	17.22	16.95	0.1736	0.0547	-0.0424	-0.1246	0.5809	0.4248	0.5597	0.2972
525	40s ribosomal protein s14 OS=Nannochloropsis gaditana GN=Naga_100136g14 PE=3 SV=1	W7U8N9_9STRA	Naga_100136g14	16 kDa	33	-0.27	0.0001	15.94	16.11	16.14	16.05	15.65	15.82	15.85	15.81	-0.1288	0.0553	0.0784	-0.017	-0.4149	-0.2411	-0.2382	-0.2615
526	Nadh ubiquinone oxidoreductase b22-like subunit OS=Nannochloropsis gaditana GN=Naga_100133g10 PE=4 SV=1	W7U7J8_9STRA	Naga_100133g10	29 kDa	11	0.32	0.0001	17.07	17.1	17.2	17.08	17.44	17.33	17.56	17.41	-0.051	-0.0151	0.0892	-0.0487	0.3239	0.2178	0.4403	0.2869
527	Dihydrolipoyl dehydrogenase OS=Nannochloropsis gaditana GN=GCSL PE=4 SV=1	W7U9J4_9STRA	GCSL	53 kDa	44	0.22	0.0001	16.57	16.64	16.51	16.58	16.85	16.79	16.85	16.74	-0.0102	0.0706	-0.0624	-0.0014	0.2655	0.2051	0.2643	0.1414
528	Large subunit ribosomal protein L35e OS=Nannochloropsis gaditana (strain CCMP526) GN=RP-L35E PE=3 SV=1	K8Z3E2_NANGC (+1)	RP-L35E	14 kDa	13	-0.31	0.0001	17.09	17.02	17.05	17.01	16.55	16.93	16.84	16.54	0.0463	-0.0242	0.0083	-0.0298	-0.4916	-0.1061	-0.1991	-0.5113
529	50S ribosomal protein L31, chloroplastic OS=Nannochloropsis gaditana GN=rpl31 PE=3 SV=1	K9ZX83_9STRA	rpl31	9 kDa	5	-0.61	0.0001	17.59	17.38	17.47	17.42	16.86	16.83	16.77	16.92	0.1425	-0.0727	0.0146	-0.0362	-0.5503	-0.6124	-0.6595	-0.5451
530	Uncharacterized protein OS=Nannochloropsis gaditana GN=Naga_100001g92 PE=4 SV=1	W7TKV6_9STRA	Naga_100001g92	22 kDa	13	0.29	0.0001	16.49	16.24	16.33	16.16	16.77	16.54	16.56	16.53	0.1986	-0.0598	0.0315	-0.1463	0.4731	0.2408	0.2616	0.2276
531	Tetratricopeptide repeat-containing protein OS=Nannochloropsis gaditana GN=Naga_100115g20 PE=4 SV=1	W7TVH9_9STRA	Naga_100115g20	106 kDa	21	0.19	0.0001	15.99	16.1	16.21	16.23	16.25	16.26	16.4	16.4	-0.1443	-0.0338	0.071	0.0905	0.122	0.1327	0.2634	0.269
532	5-cytosolic iii OS=Nannochloropsis gaditana GN=Naga_100029g5 PE=4 SV=1	W7TT02_9STRA	Naga_100029g5	50 kDa	9	0.3	0.0001	16.43	16.24	16.65	16.49	16.74	16.79	16.78	16.74	-0.0371	-0.2214	0.1898	0.0303	0.2913	0.3342	0.318	0.3096
533	Pentapeptide repeat protein OS=Nannochloropsis gaditana (strain CCMP526) GN=NGA_0583102 PE=4 SV=1	K8YWL2_NANGC (+1)	NGA_0583102	23 kDa	14	0.33	0.0001	15.89	15.8	15.96	15.81	16.17	16.17	16.25	16.17	0.0156	-0.0563	0.1004	-0.0573	0.3064	0.3225	0.384	0.3109
534	Uncharacterized protein OS=Nannochloropsis gaditana GN=Naga_100001g136 PE=4 SV=1	W7U1S3_9STRA	Naga_100001g136	85 kDa	8	0.29	0.0001	15.72	15.91	16	15.9	16.13	16.11	16.36	16.16	-0.1624	0.0018	0.0988	0.0034	0.2183	0.2115	0.4617	0.275
535	Glucokinase OS=Nannochloropsis gaditana GN=Naga_100119g19 PE=4 SV=1	W7U8G2_9STRA	Naga_100119g19	35 kDa	22	0.34	0.0001	16.15	16.42	16.34	16.25	16.69	16.6	16.62	16.63	-0.1512	0.1295	0.0397	-0.0479	0.3923	0.2946	0.3269	0.3266
536	Hydrolase OS=Nannochloropsis gaditana GN=Naga_100020g69 PE=4 SV=1	W7TDB4_9STRA	Naga_100020g69	38 kDa	7	0.26	0.0001	15.33	15.33	15.38	15.2	15.55	15.65	15.52	15.51	0.0323	0.0209	0.0649	-0.1137	0.2423	0.3459	0.2165	0.2052
537	Cell cycle arrest protein BUB3 OS=Nannochloropsis gaditana (strain CCMP526) GN=BUB3 PE=4 SV=1	K8Z3F8_NANGC (+1)	BUB3	36 kDa	8	0.32	0.0001	16.14	16.26	16.23	16.22	16.48	16.49	16.57	16.61	-0.0808	0.0397	0.0157	0.0131	0.2506	0.264	0.3362	0.4001
538	Cluster of Purple acid phosphatase OS=Nannochloropsis gaditana GN=Naga_100397g3 PE=3 SV=1 (W7TLQ2_9STRA)	W7TLQ2_9STRA [2]	Naga_100397g3	56 kDa	9	0.71	0.0001	14.92	14.6	15.1	15.07	15.64	15.26	15.6	15.88	-0.0317	-0.3283	0.1486	0.1159	0.6998	0.3808	0.6444	0.9642
539	Peptidyl-prolyl cis-trans isomerase OS=Nannochloropsis gaditana GN=CYN PE=4 SV=1	W7TQJ8_9STRA	CYN	51 kDa	61	0.16	0.0001	17.29	17.13	17.18	17.09	17.46	17.27	17.31	17.32	0.1123	-0.0291	0.017	-0.0741	0.2809	0.1031	0.134	0.1439
540	Acetylserotonin o-methyltransferase-like protein OS=Nannochloropsis gaditana (strain CCMP526) GN=NGA_0415000 PE=3 SV=1	K8Z6G1_NANGC (+1)	NGA_0415000	32 kDa	9	0.31	0.0001	15.5	15.6	15.54	15.39	15.71	15.88	15.87	15.83	-0.0052	0.0814	0.015	-0.112	0.192	0.3803	0.3716	0.3245
541	Photosystem ii oxygen evolving complex protein OS=Nannochloropsis gaditana GN=Naga_100119g18 PE=4 SV=1	W7U8H1_9STRA	Naga_100119g18	26 kDa	20	0.27	0.0001	16.14	16.3	16.16	16.23	16.48	16.46	16.53	16.47	-0.0755	0.0821	-0.0564	0.0252	0.2673	0.2393	0.3119	0.2553
542	Monooxygenase fad-binding protein OS=Nannochloropsis gaditana GN=Naga_100033g45 PE=4 SV=1	W7U481_9STRA	Naga_100033g45	75 kDa	6	0.48	0.0001	15.22	15.41	15.57	15.44	15.73	15.96	16.01	15.87	-0.1942	-0.0102	0.1569	0.0258	0.3284	0.5484	0.6076	0.4616
543	Uncharacterized protein OS=Nannochloropsis gaditana (strain CCMP526) GN=NGA_0175600 PE=4 SV=1	K8Z4T8_NANGC (+1)	NGA_0175600	39 kDa	15	0.33	0.0001	15.92	15.85	15.99	15.94	16.32	16.19	16.32	16.23	-0.016	-0.0783	0.0594	0.0124	0.3866	0.2538	0.408	0.3239
544	Alcohol dehydrogenase GroES-like protein OS=Nannochloropsis gaditana GN=Naga_100041g29 PE=4 SV=1	W7T256_9STRA	Naga_100041g29	41 kDa	17	0.27	0.0001	15.92	15.95	15.86	15.83	16.13	16.26	16.18	16.06	0.0378	0.0482	-0.0306	-0.0631	0.2266	0.3752	0.2888	0.1648
545	Cluster of Uncharacterized protein (Fragment) OS=Nannochloropsis gaditana (strain CCMP526) GN=NGA_0438900 PE=4 SV=1 (K8YW73_NANGC)	K8YW73_NANGC [2]	NGA_0438900	117 kDa	24	0.36	0.0001	15.62	15.74	15.82	16.02	16.15	15.97	16.2	16.44	-0.2126	-0.0761	0.0012	0.1926	0.3375	0.143	0.3892	0.6275
546	Uncharacterized protein OS=Nannochloropsis gaditana GN=Naga_100004g157 PE=4 SV=1	W7TQA8_9STRA	Naga_100004g157	50 kDa	4	0.52	0.0001	15.02	14.91	15.22	14.82	15.59	15.33	15.61	15.51	0.01	-0.1003	0.2147	-0.1912	0.5944	0.3073	0.6028	0.5086
547	30S ribosomal protein S13, chloroplastic OS=Nannochloropsis gaditana GN=rps13 PE=3 SV=1	K9ZX47_9STRA	rps13	14 kDa	18	-0.6	0.0001	16.3	16.6	16.71	16.66	15.9	15.89	16.02	16.13	-0.2805	0.0192	0.1386	0.0909	-0.6811	-0.6964	-0.5657	-0.4556
548	Beta-glucan-binding protein OS=Nannochloropsis gaditana GN=Naga_100042g33 PE=4 SV=1	W7TQI2_9STRA	Naga_100042g33	91 kDa	21	0.29	0.0001	16.08	16.2	16.27	16.18	16.42	16.46	16.57	16.48	-0.1206	0.023	0.1004	0.0059	0.2267	0.2693	0.3628	0.3009
549	Carboxyl transferase OS=Nannochloropsis gaditana GN=Naga_100061g16 PE=4 SV=1	W7T2I2_9STRA	Naga_100061g16	61 kDa	28	0.18	0.0001	15.53	15.42	15.65	15.56	15.71	15.56	15.85	15.78	-0.0171	-0.1181	0.1021	0.0141	0.1743	0.0184	0.3112	0.2369
550	Chlorophyll A-B binding protein OS=Nannochloropsis gaditana GN=Naga_100030g5 PE=4 SV=1	W7TTN9_9STRA	Naga_100030g5	30 kDa	34	-0.24	0.0001	17.09	17.06	17.09	17.09	16.86	16.75	16.85	16.93	0.0119	-0.0191	0.0069	0.012	-0.2289	-0.343	-0.2461	-0.1567
551	Fe-Fe hydrogenase maturation protein OS=Nannochloropsis gaditana (strain CCMP526) GN=HYDG PE=4 SV=1	K8Z4Y9_NANGC (+1)	HYDG	66 kDa	7	0.34	0.0001	15.99	16.21	16.3	16.28	16.5	16.56	16.49	16.58	-0.211	0.0149	0.1075	0.0892	0.3018	0.3753	0.2872	0.3855
552	Oxidoreductase domain protein OS=Nannochloropsis gaditana (strain CCMP526) GN=NGA_0391400 PE=4 SV=1	K8YRS1_NANGC	NGA_0391400	47 kDa	53	-0.19	0.0001	16.51	16.52	16.39	16.44	16.3	16.3	16.25	16.23	0.0418	0.0614	-0.0713	-0.0166	-0.1635	-0.1583	-0.2202	-0.2251
553	Large subunit ribosomal protein L22e OS=Nannochloropsis gaditana (strain CCMP526) GN=RP-L22E PE=4 SV=1	K8YWM1_NANGC (+1)	RP-L22E	14 kDa	23	-0.23	0.0001	16.67	16.86	16.85	16.85	16.38	16.63	16.68	16.63	-0.1499	0.0449	0.0369	0.0291	-0.4465	-0.1977	-0.1478	-0.2058
554	Uncharacterized protein OS=Nannochloropsis gaditana GN=Naga_100290g1 PE=4 SV=1	W7T6B0_9STRA	Naga_100290g1	24 kDa	8	0.46	0.0001	16.37	16.71	16.33	16.4	17.18	16.94	16.79	16.74	-0.0717	0.2551	-0.1312	-0.0575	0.725	0.4702	0.3336	0.2836
555	Uncharacterized protein OS=Nannochloropsis gaditana (strain CCMP526) GN=NGA_0212500 PE=4 SV=1	K8YX06_NANGC (+1)	NGA_0212500	62 kDa	24	-0.3	0.0001	16.89	16.72	16.89	16.91	16.58	16.56	16.53	16.55	0.0298	-0.1413	0.0347	0.0501	-0.2833	-0.293	-0.3248	-0.3151
556	Didehydrogluconate reductase OS=Nannochloropsis gaditana GN=Naga_100100g4 PE=4 SV=1	W7UCH2_9STRA	Naga_100100g4	36 kDa	6	0.26	0.0001	16.89	17.12	16.88	16.95	17.18	17.3	17.2	17.15	-0.0619	0.1674	-0.0728	0.0015	0.2295	0.3465	0.2534	0.2043
557	Tropinone reductase OS=Nannochloropsis gaditana GN=Naga_100050g18 PE=4 SV=1	W7UA18_9STRA	Naga_100050g18	28 kDa	18	0.22	0.0001	15.53	15.59	15.45	15.5	15.71	15.78	15.69	15.79	-0.0007	0.0694	-0.0641	-0.0169	0.1948	0.2432	0.1672	0.2653
558	Photosystem II protein D1 OS=Nannochloropsis gaditana GN=psbA PE=3 SV=1	K9ZWZ5_9STRA	psbA	40 kDa	59	-0.26	0.0001	16.73	16.71	16.67	16.68	16.45	16.53	16.46	16.27	0.0103	0.0171	-0.0335	-0.0175	-0.2601	-0.1763	-0.2324	-0.4277
559	H/ACA ribonucleoprotein complex subunit 4 OS=Nannochloropsis gaditana (strain CCMP526) GN=DKC1 PE=4 SV=1	K8Z676_NANGC (+1)	DKC1	55 kDa	15	0.35	0.0001	16.14	16.26	16.5	16.39	16.6	16.62	16.79	16.72	-0.1901	-0.0703	0.1771	0.0578	0.2668	0.2905	0.4516	0.3914
560	Ribonucleoprotein LSM OS=Nannochloropsis gaditana GN=Naga_100042g3 PE=4 SV=1	W7TTD5_9STRA	Naga_100042g3	25 kDa	10	0.44	0.0001	15.74	15.4	15.74	15.53	16.22	15.98	16.01	16.01	0.1167	-0.2289	0.1293	-0.0842	0.6209	0.3678	0.3866	0.387
561	YbaB-like DNA-binding protein OS=Nannochloropsis gaditana GN=Naga_100043g30 PE=4 SV=1	W7TRK9_9STRA	Naga_100043g30	36 kDa	9	-0.69	0.0001	14.57	14.34	14.16	14.09	13.68	13.8	13.27	13.54	0.3692	0.0806	-0.0965	-0.1687	-0.562	-0.4549	-1.008	-0.7449
562	Lysosomal beta OS=Nannochloropsis gaditana GN=Naga_100007g96 PE=4 SV=1	W7TSG2_9STRA	Naga_100007g96	104 kDa	4	0.63	0.0001	16.23	16.23	16.35	16.5	17.02	16.65	17.16	17	-0.0943	-0.0973	-0.0016	0.1639	0.6962	0.321	0.8546	0.6698
563	dTDP-glucose 4,6-dehydratase OS=Nannochloropsis gaditana (strain CCMP526) GN=RFBB PE=4 SV=1	K8YSS9_NANGC (+1)	RFBB	41 kDa	14	-0.2	0.0001	17.17	17.07	16.9	17	16.9	16.77	16.8	16.8	0.1347	0.0373	-0.1421	-0.0304	-0.1383	-0.2647	-0.2203	-0.2295
564	p-type atpase OS=Nannochloropsis gaditana GN=ATP1 PE=3 SV=1	W7TTR4_9STRA	ATP1	129 kDa	78	0.14	0.0001	16.07	15.97	15.95	15.98	16.17	16.16	16.16	15.99	0.0823	-0.0199	-0.0501	-0.0057	0.1802	0.172	0.163	0.005
565	Uncharacterized protein OS=Nannochloropsis gaditana GN=Naga_100233g2 PE=4 SV=1	W7TLI5_9STRA	Naga_100233g2	61 kDa	6	0.27	0.0001	15.8	15.56	15.91	15.78	15.94	16.05	16.05	16.08	0.0351	-0.1978	0.1373	0.0207	0.2015	0.2866	0.2855	0.3215
566	Udp-sulfoquinovose synthase OS=Nannochloropsis gaditana GN=Naga_100038g9 PE=4 SV=1	W7TMH8_9STRA	Naga_100038g9	51 kDa	39	-0.2	0.0001	15.96	16.06	15.95	15.99	15.76	15.82	15.82	15.75	-0.0397	0.0659	-0.0451	0.0038	-0.2276	-0.1692	-0.167	-0.2452
567	40s ribosomal protein s10 OS=Nannochloropsis gaditana GN=Naga_100140g4 PE=4 SV=1	W7TVD2_9STRA	Naga_100140g4	28 kDa	20	-0.28	0.0001	16.81	17.26	17.16	17.06	16.32	16.87	16.91	16.89	-0.2772	0.1808	0.0824	-0.0064	-0.753	-0.2185	-0.1688	-0.1854
568	Cluster of Threonyl-tRNA synthetase (Fragment) OS=Nannochloropsis gaditana (strain CCMP526) GN=TARS PE=4 SV=1 (K8YU27_NANGC)	K8YU27_NANGC [2]	TARS	113 kDa	11	-0.41	0.0001	15.1	14.82	15.19	15.02	14.68	14.47	14.67	14.73	0.0549	-0.224	0.1609	-0.0184	-0.3425	-0.5573	-0.3831	-0.32
569	Phospholipid-transporting ATPase OS=Nannochloropsis gaditana GN=Naga_100023g23 PE=3 SV=1	W7TGI1_9STRA	Naga_100023g23	137 kDa	13	0.24	0.0001	14.99	15.1	15.31	15.17	15.28	15.59	15.38	15.32	-0.1517	-0.0508	0.165	0.0181	0.1342	0.4398	0.2269	0.1717
570	Uroporphyrinogen decarboxylase OS=Nannochloropsis gaditana GN=uroD PE=4 SV=1	W7UB10_9STRA	uroD	32 kDa	14	-0.56	0.0001	15.88	15.87	15.67	15.66	15.2	15.35	15.13	15.08	0.1203	0.104	-0.0879	-0.0995	-0.5647	-0.3893	-0.6137	-0.6636
571	Apoptosis inducing factor OS=Nannochloropsis gaditana GN=Naga_100131g7 PE=4 SV=1	W7U6U0_9STRA	Naga_100131g7	69 kDa	34	0.17	0.0001	16.06	15.89	15.93	15.83	16.19	16.13	16.08	15.99	0.1518	-0.0332	0.0113	-0.0938	0.2685	0.2104	0.163	0.0635
572	Protein disulfide isomerase OS=Nannochloropsis gaditana GN=Naga_100022g4 PE=3 SV=1	W7TR80_9STRA	Naga_100022g4	39 kDa	55	-0.14	0.0001	17.66	17.73	17.57	17.63	17.61	17.5	17.47	17.42	0.0146	0.0884	-0.0724	-0.0144	-0.0374	-0.1434	-0.1662	-0.2298
573	Uncharacterized protein OS=Nannochloropsis gaditana GN=Naga_100006g11 PE=4 SV=1	W7U9X0_9STRA	Naga_100006g11	62 kDa	8	0.28	0.0001	16.38	16.3	16.34	16.34	16.79	16.48	16.55	16.66	0.0414	-0.0431	-0.0029	-0.0001	0.4432	0.122	0.2158	0.3262
574	Light-harvesting protein OS=Nannochloropsis gaditana GN=Naga_100641g3 PE=4 SV=1	W7T8I0_9STRA	Naga_100641g3	23 kDa	19	-0.33	0.0001	17.62	17.48	17.49	17.54	17.15	17.25	17.15	17.24	0.0826	-0.0361	-0.0329	0.0264	-0.3702	-0.269	-0.3703	-0.2714
575	Methionine aminopeptidase 2 OS=Nannochloropsis gaditana GN=Naga_100004g92 PE=3 SV=1	W7U6D6_9STRA	Naga_100004g92	60 kDa	12	0.23	0.0001	15.02	15.19	15.31	15.23	15.47	15.36	15.55	15.35	-0.161	-0.0064	0.1174	0.0355	0.2742	0.1631	0.3558	0.1563
576	Family s49 OS=Nannochloropsis gaditana GN=Naga_100017g61 PE=4 SV=1	W7UAK4_9STRA	Naga_100017g61	23 kDa	7	0.46	0.0001	16.25	15.89	16.22	16.2	16.59	16.39	16.8	16.64	0.0932	-0.2904	0.0707	0.0364	0.4466	0.2065	0.6616	0.4948
577	Uroporphyrinogen decarboxylase OS=Nannochloropsis gaditana GN=Naga_100017g11 PE=3 SV=1	W7UA58_9STRA	Naga_100017g11	48 kDa	9	-0.27	0.0001	15.91	16.14	15.87	15.97	15.74	15.68	15.67	15.73	-0.0606	0.1567	-0.1001	-0.003	-0.2258	-0.295	-0.3016	-0.2529
578	Geranylgeranyl pyrophosphate synthase OS=Nannochloropsis gaditana GN=Naga_100002g113 PE=3 SV=1	W7TNT7_9STRA (+1)	Naga_100002g113	34 kDa	10	-0.6	0.0001	17.06	16.99	16.9	16.92	16.44	16.4	16.32	16.25	0.0981	0.0207	-0.0689	-0.0549	-0.5272	-0.6049	-0.6472	-0.6956
579	Small subunit ribosomal protein S9e OS=Nannochloropsis gaditana (strain CCMP526) GN=RP-S9E PE=3 SV=1	K8Z8Z7_NANGC (+1)	RP-S9E	23 kDa	29	-0.18	0.0001	16.59	16.63	16.6	16.65	16.35	16.52	16.51	16.36	-0.0018	0.0063	-0.0175	0.0353	-0.279	-0.0945	-0.1137	-0.2841
580	5-3 exoribonuclease 1 OS=Nannochloropsis gaditana GN=Naga_100015g46 PE=4 SV=1	W7U4G2_9STRA	Naga_100015g46	179 kDa	22	0.19	0.0001	14.63	14.68	14.78	14.78	14.9	14.74	15.06	14.93	-0.0974	-0.0371	0.0503	0.0617	0.1816	0.0101	0.3352	0.2194
581	Asparaginyl-trna synthetase OS=Nannochloropsis gaditana GN=Naga_100026g49 PE=3 SV=1	W7TW83_9STRA	Naga_100026g49	65 kDa	22	-0.16	0.0001	16.45	16.57	16.46	16.5	16.21	16.36	16.43	16.36	-0.0471	0.0672	-0.0401	0.0074	-0.2936	-0.1424	-0.0774	-0.1491
582	Ribosomal protein S7, conserved site OS=Nannochloropsis gaditana GN=Naga_100348g1 PE=3 SV=1	W7TXQ4_9STRA	Naga_100348g1	24 kDa	33	-0.2	0.0001	16.59	16.66	16.63	16.69	16.29	16.45	16.55	16.45	-0.049	0.0045	-0.0157	0.0416	-0.352	-0.1939	-0.0895	-0.1987
583	Cytochrome b6 OS=Nannochloropsis gaditana GN=petB PE=3 SV=1	K9ZX12_9STRA	petB	24 kDa	23	-0.32	0.0001	16.11	16.01	15.85	15.89	15.71	15.81	15.55	15.34	0.1359	0.0529	-0.1063	-0.0543	-0.2497	-0.15	-0.4269	-0.6204
584	Methyltransferase OS=Nannochloropsis gaditana GN=Naga_100140g8 PE=3 SV=1	W7TEG4_9STRA	Naga_100140g8	49 kDa	9	0.43	0.0001	15.58	15.54	15.65	15.8	15.93	15.92	16.23	16.2	-0.0798	-0.1365	0	0.1494	0.2783	0.2675	0.5956	0.5473
585	High mobility group protein b3 OS=Nannochloropsis gaditana GN=Naga_100004g148 PE=4 SV=1	W7U6C3_9STRA	Naga_100004g148	25 kDa	3	0.67	0.0001	13.99	14.03	14.5	13.93	14.74	14.75	14.82	14.71	-0.1079	-0.0679	0.4443	-0.1534	0.6724	0.6577	0.7482	0.6294
586	60s acidic ribosomal protein p0 OS=Nannochloropsis gaditana GN=Naga_100009g84 PE=4 SV=1	W7U6S0_9STRA	Naga_100009g84	46 kDa	39	-0.16	0.0001	17.56	17.27	17.23	17.28	17.2	17.24	17.14	17.05	0.24	-0.0482	-0.1006	-0.0327	-0.1317	-0.0883	-0.1933	-0.298
587	THO complex subunit 2 (Fragment) OS=Nannochloropsis gaditana (strain CCMP526) GN=NGATSA_3027000 PE=2 SV=1	I2CNZ1_NANGC	NGATSA_3027000	95 kDa	8	0.38	0.0001	15.46	15.36	15.57	15.53	15.8	15.77	15.95	15.97	-0.025	-0.1156	0.0893	0.0739	0.3138	0.2882	0.4662	0.4796
588	Alcohol dehydrogenase (NADP+) OS=Nannochloropsis gaditana (strain CCMP526) GN=NGATSA_3018700 PE=2 SV=1	I2CR67_NANGC	NGATSA_3018700	35 kDa	19	0.25	0.0001	15.98	15.89	15.63	15.6	16.2	16.11	15.96	15.83	0.2195	0.1119	-0.1463	-0.174	0.4124	0.3483	0.1936	0.0615
589	UDPglucose pyrophosphorylase OS=Nannochloropsis gaditana GN=Naga_100003g178 PE=4 SV=1	W7UBR1_9STRA	Naga_100003g178	78 kDa	11	-0.21	0.0001	16.39	16.51	16.41	16.38	16.14	16.26	16.26	16.21	-0.0294	0.0929	-0.0149	-0.0373	-0.2803	-0.158	-0.1642	-0.2274
590	Aig2-like protein OS=Nannochloropsis gaditana GN=Naga_100962g1 PE=4 SV=1	W7T0R7_9STRA	Naga_100962g1	17 kDa	4	0.56	0.0001	15.19	15.09	15.25	15.17	15.63	15.85	15.66	15.85	0.0118	-0.1101	0.0662	-0.0229	0.471	0.6707	0.4777	0.6519
591	Phytanoyl-dioxygenase OS=Nannochloropsis gaditana GN=Naga_100024g3 PE=4 SV=1	W7TZY3_9STRA	Naga_100024g3	35 kDa	6	0.32	0.0001	16.2	16.17	16.19	16.16	16.5	16.51	16.55	16.44	0.0295	-0.012	0.0044	-0.015	0.3229	0.3318	0.3766	0.2483
592	Protein translocase subunit SecA OS=Nannochloropsis gaditana GN=SecA PE=3 SV=1	W7TYL7_9STRA	SecA	111 kDa	55	-0.22	0.0001	15.36	15.43	15.41	15.39	15.17	15.2	15.14	15.23	-0.0428	0.0365	0.0111	-0.0114	-0.2341	-0.1925	-0.2706	-0.1657
593	Light-harvesting protein OS=Nannochloropsis gaditana GN=LHC26 PE=4 SV=1	W7UAI7_9STRA	LHC26	24 kDa	69	-0.21	0.0001	15.43	15.46	15.47	15.5	15.25	15.31	15.13	15.28	-0.0334	-0.0098	0.0068	0.0299	-0.2075	-0.1522	-0.3579	-0.1799
594	Cdc25 protein OS=Nannochloropsis gaditana GN=Naga_100002g9 PE=4 SV=1	W7U744_9STRA	Naga_100002g9	55 kDa	7	0.27	0.0001	14.25	14.27	14.39	14.34	14.54	14.69	14.58	14.54	-0.0582	-0.0455	0.0717	0.0246	0.2284	0.374	0.2593	0.2407
595	ABC transporter protein in ATPase operon OS=Nannochloropsis gaditana GN=sufC PE=4 SV=1	K9ZWC2_9STRA	sufC	32 kDa	22	-0.23	0.0001	16.33	16.31	16.24	16.24	16.07	16.09	16.03	15.99	0.058	0.042	-0.0242	-0.041	-0.2064	-0.1865	-0.264	-0.2909
596	Small nuclear ribonucleoprotein D1 (Fragment) OS=Nannochloropsis gaditana (strain CCMP526) GN=SNRPD1 PE=4 SV=1	K8YV09_NANGC (+2)	SNRPD1	12 kDa	7	0.37	0.0001	15.38	15.11	15.36	15.2	15.67	15.55	15.75	15.59	0.1058	-0.1597	0.0849	-0.0613	0.4121	0.2796	0.5097	0.3421
597	Redoxin domain protein OS=Nannochloropsis gaditana (strain CCMP526) GN=NGA_0194200 PE=4 SV=1	K8YTY6_NANGC (+1)	NGA_0194200	19 kDa	5	0.5	0.0001	14.84	14.93	14.98	14.93	15.28	15.44	15.43	15.51	-0.0936	-0.0018	0.0499	-0.0054	0.3613	0.5025	0.5127	0.587
598	Endo-b--glucanase (Fragment) OS=Nannochloropsis gaditana (strain CCMP526) GN=NGATSA_3006000 PE=2 SV=1	I2CP31_NANGC	NGATSA_3006000	68 kDa	6	0.31	0.0001	16.28	16.42	16.13	16.1	16.53	16.53	16.63	16.48	0.0497	0.1844	-0.1013	-0.1352	0.305	0.3152	0.4051	0.2544
599	Aminomethyltransferase OS=Nannochloropsis gaditana GN=GDCT PE=3 SV=1	W7U1A6_9STRA	GDCT	45 kDa	50	0.18	0.0001	17.28	17.28	17.16	17.08	17.4	17.33	17.43	17.32	0.0771	0.0894	-0.0474	-0.1186	0.2075	0.134	0.2274	0.1122
600	Ph-response regulator protein pala rim20 OS=Nannochloropsis gaditana GN=Naga_100021g26 PE=4 SV=1	W7TFM9_9STRA	Naga_100021g26	94 kDa	6	0.28	0.0001	14.99	15.11	15.28	15.15	15.48	15.42	15.28	15.47	-0.1442	-0.0255	0.143	0.019	0.3403	0.2852	0.1443	0.33
601	Uncharacterized protein (Fragment) OS=Nannochloropsis gaditana (strain CCMP526) GN=NGA_0710700 PE=4 SV=1	K8Z940_NANGC	NGA_0710700	19 kDa	29	0.51	0.0001	16.26	15.2	16.19	16.25	17.2	16.01	16.58	16.88	0.1457	-0.9176	0.0664	0.1281	1.0536	-0.1052	0.4574	0.7535
602	Photosystem I reaction center subunit XI OS=Nannochloropsis gaditana GN=psaL PE=4 SV=1	K9ZX25_9STRA	psaL	19 kDa	34	-0.33	0.0001	16.94	16.98	16.99	16.94	16.61	16.7	16.57	16.64	-0.0325	0.0207	0.0287	-0.024	-0.3807	-0.2636	-0.4049	-0.3272
603	Indole-3-glycerol phosphate synthase OS=Nannochloropsis gaditana GN=Naga_100205g4 PE=4 SV=1	W7U0M8_9STRA	Naga_100205g4	108 kDa	13	-0.22	0.0001	15.26	15.43	15.43	15.44	15.13	15.23	15.12	15.19	-0.1339	0.0445	0.0409	0.05	-0.269	-0.158	-0.2641	-0.1978
604	Uncharacterized protein OS=Nannochloropsis gaditana GN=Naga_100163g9 PE=4 SV=1	W7TB90_9STRA (+1)	Naga_100163g9	72 kDa	24	-0.18	0.0001	15.92	16.12	15.87	15.99	15.88	15.63	15.82	15.84	-0.0384	0.1462	-0.1083	0.0197	-0.1025	-0.3525	-0.1609	-0.135
605	Psbp domain-containing protein chloroplastic-like protein OS=Nannochloropsis gaditana GN=Naga_100204g5 PE=4 SV=1	W7TLE2_9STRA	Naga_100204g5	29 kDa	10	0.24	0.0001	17	16.97	17.01	16.97	17.38	17.11	17.27	17.18	0.0041	-0.0177	0.0246	-0.0152	0.3905	0.1171	0.276	0.187
606	Uncharacterized protein OS=Nannochloropsis gaditana GN=Naga_100003g169 PE=4 SV=1	W7TVP1_9STRA	Naga_100003g169	33 kDa	4	0.67	0.0001	16.44	16.45	16.66	16.49	17.09	17.09	17.32	17.25	-0.0641	-0.096	0.1397	-0.0389	0.5311	0.5535	0.79	0.6938
607	Regulatory factor, effector, bacterial OS=Nannochloropsis gaditana GN=Naga_100427g3 PE=4 SV=1	W7TC17_9STRA	Naga_100427g3	25 kDa	5	0.49	0.0001	13.28	13.09	13.23	13.32	13.67	13.82	13.64	13.78	0.0482	-0.1377	-0.052	0.0813	0.4397	0.5774	0.4067	0.5432
608	Carboxypeptidase OS=Nannochloropsis gaditana (strain CCMP526) GN=CTSA PE=3 SV=1	K8YUH7_NANGC	CTSA	97 kDa	9	0.43	0.0001	16.24	16.33	16.35	16.21	16.72	16.88	16.65	16.59	-0.0378	0.047	0.0735	-0.0728	0.4061	0.596	0.3608	0.2902
609	Uncharacterized protein (Fragment) OS=Nannochloropsis gaditana (strain CCMP526) GN=NGA_0428900 PE=4 SV=1	K8YVK1_NANGC	NGA_0428900	47 kDa	14	0.31	0.0001	15.71	15.87	15.85	15.79	16.17	16.12	16.02	16.16	-0.1061	0.0787	0.0528	-0.008	0.3589	0.3087	0.2016	0.3514
610	Uncharacterized protein OS=Nannochloropsis gaditana GN=Naga_100377g5 PE=4 SV=1	W7TY60_9STRA	Naga_100377g5	36 kDa	10	0.49	0.0001	16.23	16.2	16.06	16.19	16.98	16.65	16.6	16.47	0.0207	0.0365	-0.1051	0.0363	0.8074	0.4915	0.4386	0.3054
611	Importin subunit beta-1 OS=Nannochloropsis gaditana GN=Naga_100038g31 PE=4 SV=1	W7TJK3_9STRA	Naga_100038g31	97 kDa	36	0.19	0.0001	16.07	16.02	15.96	15.9	16.21	16.22	16.14	16.13	0.0801	0.0349	-0.0217	-0.0878	0.2243	0.2271	0.1484	0.1456
612	Peptidoglycan-binding lysin domain containing protein OS=Nannochloropsis gaditana (strain CCMP526) GN=NGA_0557600 PE=4 SV=1	K8Z1L6_NANGC (+1)	NGA_0557600	49 kDa	17	0.61	0.0001	14.66	14.93	15.14	15.45	15.32	15.28	15.93	16.2	-0.422	-0.169	0.0594	0.3716	0.2539	0.1992	0.8554	1.1385
613	Phosphoglycerate kinase OS=Nannochloropsis gaditana GN=Naga_100014g18 PE=3 SV=1	W7TRI5_9STRA	Naga_100014g18	46 kDa	68	0.17	0.0001	16.13	16.04	16.07	16.03	16.18	16.17	16.29	16.31	0.0674	-0.0276	0.0059	-0.0459	0.109	0.1044	0.2191	0.2366
614	Cyanate hydratase OS=Nannochloropsis gaditana GN=Naga_100490g4 PE=4 SV=1	W7TNU1_9STRA	Naga_100490g4	17 kDa	8	0.25	0.0001	17.71	17.44	17.48	17.39	17.89	17.71	17.67	17.72	0.2259	-0.0576	-0.0166	-0.1023	0.3937	0.2103	0.1788	0.2262
615	Myo-inositol monophosphatase 1 OS=Nannochloropsis gaditana GN=IMP PE=4 SV=1	W7TWA1_9STRA	IMP	35 kDa	11	0.21	0.0001	16.29	16.16	16.29	16.24	16.47	16.45	16.52	16.39	0.0512	-0.0919	0.0491	0.0009	0.2239	0.2029	0.2713	0.1444
616	Superoxide dismutase OS=Nannochloropsis gaditana GN=Naga_100104g10 PE=4 SV=1	W7TNQ1_9STRA (+1)	Naga_100104g10	34 kDa	5	0.47	0.0001	14.67	14.79	14.57	14.65	15.42	15.24	15.09	14.81	0.0011	0.1175	-0.1108	-0.0437	0.7352	0.5684	0.4261	0.1635
617	Vacuolar (H+)-ATPase G subunit OS=Nannochloropsis gaditana GN=Naga_100002g55 PE=4 SV=1	W7TYV8_9STRA	Naga_100002g55	25 kDa	18	0.31	0.0001	16.71	16.65	16.57	16.51	17.14	16.84	16.9	16.82	0.0963	0.0313	-0.0413	-0.1098	0.535	0.2152	0.2834	0.2254
618	Chalcone isomerase-like protein OS=Nannochloropsis gaditana (strain CCMP526) GN=NGA_0110601 PE=4 SV=1	K8YXA6_NANGC (+1)	NGA_0110601	26 kDa	19	-0.26	0.0001	17.19	17.04	17.1	17.12	16.83	16.86	16.9	16.79	0.0778	-0.0754	-0.007	0.0141	-0.2826	-0.2447	-0.2045	-0.3066
619	Uncharacterized protein (Fragment) OS=Nannochloropsis gaditana (strain CCMP526) GN=NGA_2128900 PE=4 SV=1	K8YMW2_NANGC	NGA_2128900	38 kDa	5	0.52	0.0001	15.99	16.59	16.47	16.55	16.74	16.89	17.14	17.02	-0.4378	0.1593	0.038	0.1229	0.2917	0.4734	0.6993	0.6084
620	Valyl-tRNA synthetase OS=Nannochloropsis gaditana (strain CCMP526) GN=NGATSA_3008000 PE=2 SV=1	I2CQT9_NANGC	NGATSA_3008000	71 kDa	12	-0.31	0.0001	16.44	16.36	16.41	16.43	16.1	16.09	16.09	16.15	0.0287	-0.0475	0.0015	0.0242	-0.3121	-0.3262	-0.3044	-0.239
621	RNA binding protein OS=Nannochloropsis gaditana GN=Naga_100048g5 PE=4 SV=1	W7TZ23_9STRA	Naga_100048g5	92 kDa	18	0.24	0.0001	16.77	16.92	17.15	17	17.14	17.19	17.3	17.22	-0.1771	-0.0351	0.1937	0.0281	0.1817	0.2291	0.3275	0.2466
622	Pyruvate dehydrogenase OS=Nannochloropsis gaditana GN=Naga_100064g27 PE=4 SV=1	W7TN62_9STRA	Naga_100064g27	55 kDa	9	0.74	0.0001	15.12	15.13	15.34	15.31	15.74	16.04	15.95	16.13	-0.1351	-0.0702	0.1265	0.0851	0.463	0.8279	0.6713	0.8768
623	40s ribosomal protein s23 OS=Nannochloropsis gaditana GN=Naga_100061g9 PE=3 SV=1	W7TKK2_9STRA	Naga_100061g9	16 kDa	27	-0.25	0.0001	16.13	16.32	16.32	16.33	15.91	16.15	16.12	15.94	-0.1397	0.0453	0.0465	0.0587	-0.3785	-0.1398	-0.1673	-0.3417
624	Uncharacterized protein OS=Nannochloropsis gaditana GN=Naga_100040g22 PE=4 SV=1	W7TKK9_9STRA	Naga_100040g22	27 kDa	7	0.3	0.0001	17.29	17.34	17.28	17.4	17.75	17.51	17.73	17.54	-0.0347	0.0064	-0.0416	0.0685	0.4262	0.181	0.4123	0.2156
625	Succinate dehydrogenase [ubiquinone] flavoprotein subunit, mitochondrial OS=Nannochloropsis gaditana GN=Naga_100024g37 PE=3 SV=1	W7TSA7_9STRA	Naga_100024g37	70 kDa	38	0.21	0.0001	16.27	16.37	16.34	16.36	16.48	16.47	16.64	16.59	-0.0565	0.0336	0.0017	0.0232	0.144	0.1324	0.2919	0.243
626	Ubiquitin-activating enzyme e1 OS=Nannochloropsis gaditana GN=Naga_100003g37 PE=3 SV=1	W7UBG5_9STRA	Naga_100003g37	137 kDa	17	0.32	0.0001	15.38	15.48	15.63	15.53	15.85	15.83	15.87	15.78	-0.1345	-0.0309	0.1091	0.0185	0.3458	0.3262	0.3652	0.2631
627	Enhancer of mrna-decapping protein 4 OS=Nannochloropsis gaditana GN=Naga_100186g5 PE=4 SV=1	W7TNA2_9STRA	Naga_100186g5	105 kDa	14	0.27	0.0001	15.81	15.66	15.76	15.68	16.09	15.95	16.01	15.92	0.0988	-0.0715	0.0321	-0.0532	0.3623	0.2157	0.274	0.1906
628	Lipase OS=Nannochloropsis gaditana GN=Naga_100241g4 PE=4 SV=1	W7U0K9_9STRA	Naga_100241g4	64 kDa	6	0.58	0.0001	15.37	15.65	15.83	15.94	16	16.07	16.43	16.7	-0.3338	-0.0599	0.1255	0.2301	0.304	0.3686	0.7296	1.0118
629	Uncharacterized protein OS=Nannochloropsis gaditana GN=Naga_100029g26 PE=4 SV=1	W7U0I9_9STRA	Naga_100029g26	34 kDa	13	-0.25	0.0001	16.57	16.45	16.53	16.35	16.21	16.33	16.15	16.21	0.1133	-0.0315	0.0675	-0.1202	-0.255	-0.1543	-0.3244	-0.2545
630	60s ribosomal protein l13a OS=Nannochloropsis gaditana GN=Naga_100003g126 PE=3 SV=1	W7TSL6_9STRA	Naga_100003g126	24 kDa	52	-0.18	0.0001	17.03	17.06	17.07	17.1	16.84	16.91	16.99	16.8	-0.0582	-0.0051	0.0009	0.0341	-0.2392	-0.1698	-0.0899	-0.2729
631	Bifunctional dihydrofolate reductase-thymidylate synthase OS=Nannochloropsis gaditana GN=Naga_100065g11 PE=3 SV=1	W7T463_9STRA	Naga_100065g11	58 kDa	5	0.38	0.0001	14.79	14.9	15	15.03	15.25	15.25	15.34	15.41	-0.1584	-0.0327	0.0555	0.0888	0.3153	0.3064	0.406	0.4677
632	Small subunit ribosomal protein S2e OS=Nannochloropsis gaditana (strain CCMP526) GN=RP-S2E PE=3 SV=1	K8Z375_NANGC (+1)	RP-S2E	30 kDa	53	-0.15	0.0001	16.24	16.29	16.34	16.37	16.04	16.25	16.22	16.11	-0.0938	-0.0212	0.02	0.0567	-0.2829	-0.0652	-0.1061	-0.2075
633	Thioredoxin-like protein 1 OS=Nannochloropsis gaditana (strain CCMP526) GN=NGA_0382800 PE=4 SV=1	K8YRV6_NANGC (+1)	NGA_0382800	20 kDa	7	0.34	0.0001	15.21	15.24	15.09	15.12	15.72	15.42	15.4	15.56	0.0405	0.0821	-0.0686	-0.0444	0.5654	0.2522	0.2295	0.3925
634	Nucleosome chromatin assembly complex protein OS=Nannochloropsis gaditana GN=Naga_100333g2 PE=3 SV=1	W7TQD0_9STRA	Naga_100333g2	41 kDa	4	0.35	0.0001	15.51	15.69	15.79	15.49	16.08	15.96	16.04	15.85	-0.1301	0.0555	0.1578	-0.1641	0.4561	0.3248	0.411	0.2165
635	Atp synthase gamma subunit (Fragment) OS=Nannochloropsis gaditana GN=AtpC PE=4 SV=1	W7T9E7_9STRA	AtpC	15 kDa	15	-0.26	0.0001	16.56	16.6	16.65	16.59	16.31	16.43	16.3	16.28	-0.0319	0	0.0444	-0.0047	-0.278	-0.1675	-0.3005	-0.322
636	Abc transporter atp-binding protein OS=Nannochloropsis gaditana GN=Naga_100080g16 PE=4 SV=1	W7U335_9STRA	Naga_100080g16	73 kDa	19	-0.38	0.0001	15.86	15.84	16.02	16.03	15.66	15.48	15.52	15.59	-0.0938	-0.0908	0.075	0.1135	-0.2849	-0.4628	-0.4311	-0.3556
637	Carbamoyl-phosphate synthase OS=Nannochloropsis gaditana GN=CPS PE=3 SV=1	W7U5E4_9STRA	CPS	168 kDa	85	-0.09	0.0001	16.83	16.91	16.87	16.83	16.68	16.67	16.91	16.81	-0.0288	0.0461	-0.0017	-0.0351	-0.1857	-0.1845	0.0433	-0.0594
638	Heat shock protein 101 (Fragment) OS=Nannochloropsis gaditana GN=Naga_102025g1 PE=4 SV=1	W7TES0_9STRA	Naga_102025g1	23 kDa	7	0.3	0.0001	16.14	16.19	16.43	16.31	16.56	16.7	16.63	16.38	-0.1302	-0.0853	0.1545	0.0379	0.2862	0.4248	0.3547	0.1036
639	Uncharacterized protein OS=Nannochloropsis gaditana GN=Naga_100031g41 PE=4 SV=1	W7TH75_9STRA	Naga_100031g41	10 kDa	16	0.18	0.0001	15.73	15.61	15.67	15.67	15.88	15.83	15.84	15.84	0.0572	-0.0554	0.0005	-0.0068	0.2159	0.1576	0.1615	0.1718
640	Extrinsic protein in photosystem ii OS=Nannochloropsis gaditana GN=Naga_100098g14 PE=4 SV=1	W7TXJ7_9STRA	Naga_100098g14	20 kDa	55	0.17	0.0001	16.69	16.83	16.68	16.62	16.88	16.83	16.9	16.89	-0.0282	0.1276	-0.0192	-0.0821	0.1677	0.1132	0.1866	0.1828
641	Vesicle-fusing ATPase OS=Nannochloropsis gaditana (strain CCMP526) GN=NSF PE=4 SV=1	K8YYF3_NANGC (+1)	NSF	80 kDa	13	0.24	0.0001	15.16	14.98	15.14	15.3	15.31	15.17	15.56	15.44	0.0311	-0.1628	-0.0034	0.1541	0.1712	0.0292	0.4142	0.2931
642	Cluster of Uncharacterized protein OS=Nannochloropsis gaditana (strain CCMP526) GN=NGA_0179202 PE=4 SV=1 (K8YYX6_NANGC)	K8YYX6_NANGC [2]	NGA_0179202	36 kDa	14	0.26	0.0001	15.93	15.92	15.84	15.91	16.22	16.08	16.13	16.18	0.0436	0.0233	-0.0676	0.0271	0.3339	0.1879	0.2222	0.2914
643	Pyruvate dehydrogenase E1 component subunit alpha OS=Nannochloropsis gaditana GN=Naga_100136g4 PE=4 SV=1	W7TQD1_9STRA	Naga_100136g4	120 kDa	36	0.23	0.0001	15.35	15.48	15.6	15.54	15.66	15.66	15.84	15.74	-0.1433	-0.0129	0.102	0.0416	0.1639	0.1584	0.3439	0.2442
644	Malonyl-:acp transacylase OS=Nannochloropsis gaditana GN=MCAT PE=2 SV=1	S5VRZ9_9STRA	MCAT	37 kDa	33	-0.21	0.0001	17.46	17.58	17.26	17.35	17.02	17.29	17.27	17.19	0.0358	0.1689	-0.1513	-0.0561	-0.3922	-0.1294	-0.1383	-0.2346
645	Fructose--bisphosphatase OS=Nannochloropsis gaditana GN=FBP PE=3 SV=1	W7TEP4_9STRA	FBP	54 kDa	14	-0.26	0.0001	13.95	13.88	13.82	13.79	13.57	13.61	13.56	13.61	0.0901	0.0261	-0.0267	-0.0604	-0.3044	-0.2503	-0.3129	-0.2655
646	Nucleoredoxin OS=Nannochloropsis gaditana GN=Naga_100010g22 PE=4 SV=1	W7TJF5_9STRA	Naga_100010g22	70 kDa	36	-0.14	0.0001	17.65	17.4	17.39	17.38	17.43	17.39	17.23	17.1	0.2107	-0.0375	-0.0498	-0.0601	-0.0131	-0.0486	-0.2224	-0.3315
647	Ubiquitin-activating enzyme E1 OS=Nannochloropsis gaditana (strain CCMP526) GN=NGATSA_3056600 PE=2 SV=1	I2CSG2_NANGC	NGATSA_3056600	115 kDa	41	-0.11	0.0001	16.85	16.89	16.74	16.79	16.78	16.68	16.72	16.65	0.0272	0.0679	-0.0775	-0.027	-0.0464	-0.1356	-0.1037	-0.1776
648	50S ribosomal protein L32, chloroplastic OS=Nannochloropsis gaditana GN=rpl32 PE=3 SV=1	K9ZVG2_9STRA	rpl32	6 kDa	7	-0.57	0.0001	17.45	17	16.8	16.87	16.47	16.4	16.43	16.2	0.455	0.0338	-0.1744	-0.0953	-0.4749	-0.5552	-0.5235	-0.7722
649	Ubiquitin-fold modifier 1 OS=Nannochloropsis gaditana GN=Naga_100012g85 PE=4 SV=1	W7TLM4_9STRA	Naga_100012g85	13 kDa	5	0.42	0.0001	15.35	15.53	15.65	15.47	15.78	15.94	15.99	15.96	-0.1711	0.0206	0.1338	-0.0385	0.3195	0.4671	0.4825	0.4622
650	Actin beta/gamma 1 (Fragment) OS=Nannochloropsis gaditana (strain CCMP526) GN=ACTB_G1 PE=3 SV=1	K8Z0E9_NANGC (+1)	ACTB_G1	42 kDa	99	0.17	0.0001	16.85	16.86	16.79	16.83	16.87	17.05	17.02	17.05	0.0186	0.0287	-0.0392	-0.0094	0.0271	0.2207	0.1912	0.2103
651	Uncharacterized protein OS=Nannochloropsis gaditana GN=Naga_100207g1 PE=4 SV=1	W7TYM5_9STRA	Naga_100207g1	100 kDa	13	0.39	0.0001	15.02	14.99	15.03	15.17	15.66	15.07	15.58	15.58	-0.0362	-0.0783	-0.0426	0.1067	0.589	0.0058	0.4961	0.4957
652	Cellulase 2 OS=Nannochloropsis gaditana GN=Naga_100041g8 PE=4 SV=1	W7TK73_9STRA	Naga_100041g8	79 kDa	13	0.38	0.0001	15.1	15.41	15.43	15.45	15.69	15.51	15.76	16.03	-0.2658	0.0289	0.0685	0.0917	0.3361	0.1555	0.4204	0.6707
653	40s ribosomal protein OS=Nannochloropsis gaditana GN=Naga_100012g76 PE=3 SV=1	W7TDH0_9STRA	Naga_100012g76	20 kDa	20	-0.22	0.0001	16.7	16.77	16.79	16.63	16.54	16.51	16.49	16.46	-0.0019	0.051	0.074	-0.0913	-0.1835	-0.2128	-0.2439	-0.2567
654	Uncharacterized protein (Fragment) OS=Nannochloropsis gaditana (strain CCMP526) GN=NGA_0105702 PE=4 SV=1	K8YWT5_NANGC (+1)	NGA_0105702	24 kDa	6	0.62	0.0001	15.47	15.37	15.55	15.49	15.99	16.05	16.23	16.09	-0.0034	-0.0996	0.093	0.006	0.5042	0.5734	0.7533	0.6298
655	Ribosomal protein L30 OS=Nannochloropsis gaditana GN=Naga_101566g1 PE=4 SV=1	W7TJM1_9STRA	Naga_101566g1	19 kDa	8	-0.2	0.0001	16.86	16.99	16.93	16.99	16.67	16.74	16.85	16.71	-0.0943	0.049	-0.0032	0.0473	-0.2732	-0.202	-0.0952	-0.2329
656	Cellular apoptosis susceptibility protein OS=Nannochloropsis gaditana GN=Naga_100060g25 PE=4 SV=1	W7TN31_9STRA	Naga_100060g25	105 kDa	4	0.31	0.0001	16	15.93	15.96	15.86	16.19	16.26	16.3	16.26	0.0615	-0.0046	0.0254	-0.0864	0.2532	0.3303	0.3693	0.3498
657	Sulfide-quinone oxidoreductase OS=Nannochloropsis gaditana GN=Naga_101203g1 PE=4 SV=1	W7TSP9_9STRA	Naga_101203g1	10 kDa	9	0.51	0.0001	16.08	16.35	16.34	16.32	16.66	16.91	16.71	16.95	-0.2485	0.0614	0.0451	0.026	0.3607	0.6098	0.3951	0.6788
658	Epsin-like protein OS=Nannochloropsis gaditana GN=Naga_100203g3 PE=4 SV=1	W7U8E7_9STRA	Naga_100203g3	72 kDa	9	0.24	0.0001	16.53	16.56	16.79	16.74	16.82	16.99	16.9	16.93	-0.1429	-0.1024	0.1212	0.0674	0.1466	0.3198	0.2328	0.2634
659	L-galactono-1,4-lactone dehydrogenase (Fragment) OS=Nannochloropsis gaditana (strain CCMP526) GN=NGA_2082000 PE=4 SV=1	K8Z718_NANGC	NGA_2082000	71 kDa	3	0.35	0.0001	15.55	15.49	15.66	15.63	15.88	15.97	16.01	15.88	-0.0397	-0.0947	0.067	0.0453	0.2904	0.3788	0.4132	0.3
660	50S ribosomal protein L20, chloroplastic OS=Nannochloropsis gaditana GN=rpl20 PE=3 SV=1	K9ZX42_9STRA	rpl20	16 kDa	24	-0.39	0.0001	17	16.76	16.91	16.9	16.48	16.63	16.51	16.29	0.1041	-0.1304	0.0162	0.0113	-0.4199	-0.2501	-0.3531	-0.5789
661	Uncharacterized protein OS=Nannochloropsis gaditana (strain CCMP526) GN=NGA_0602310 PE=4 SV=1	K8YSA8_NANGC (+1)	NGA_0602310	36 kDa	9	0.3	0.0001	14.46	14.65	14.57	14.43	14.76	14.88	14.78	14.94	-0.0771	0.1088	0.0425	-0.1041	0.2173	0.3471	0.2391	0.4251
662	Pre-mrna-processing factor 6 OS=Nannochloropsis gaditana GN=Naga_100004g166 PE=4 SV=1	W7TQ58_9STRA	Naga_100004g166	98 kDa	7	0.33	0.0001	15.2	15.1	15.39	15.36	15.61	15.43	15.6	15.7	-0.0687	-0.1698	0.1263	0.0892	0.3572	0.1627	0.3354	0.4537
663	Vacuolar protein sorting-associated protein 26 OS=Nannochloropsis gaditana GN=Naga_100189g6 PE=4 SV=1	W7TAJ9_9STRA	Naga_100189g6	34 kDa	6	0.38	0.0001	15.43	15.27	15.29	15.25	15.78	15.53	15.77	15.65	0.1541	-0.0328	-0.018	-0.067	0.4918	0.22	0.4669	0.3397
664	Uncharacterized protein OS=Nannochloropsis gaditana (strain CCMP526) GN=NGA_0690700 PE=3 SV=1	K8ZBS2_NANGC (+1)	NGA_0690700	34 kDa	18	-0.24	0.0001	15.27	15.2	15.23	15.2	14.93	14.82	15.06	15.1	0.0524	-0.0294	0.003	-0.0157	-0.308	-0.4015	-0.1554	-0.1256
665	Fumarate hydratase OS=Nannochloropsis gaditana GN=Naga_100003g62 PE=4 SV=1	W7TSQ3_9STRA	Naga_100003g62	62 kDa	21	0.29	0.0001	15.84	16.07	15.91	15.97	16.11	16.19	16.42	16.26	-0.1064	0.1239	-0.0503	0.0176	0.1495	0.2385	0.4757	0.3031
666	60s ribosomal protein l44 OS=Nannochloropsis gaditana GN=Naga_100005g5 PE=3 SV=1	W7TXG3_9STRA	Naga_100005g5	12 kDa	15	-0.32	0.0001	17.69	17.65	17.65	17.69	17.26	17.4	17.44	17.28	0.0169	-0.0184	-0.0234	0.0137	-0.4004	-0.2712	-0.2325	-0.4146
667	Hydroxymethylglutaryl-lyase OS=Nannochloropsis gaditana GN=Naga_100002g74 PE=4 SV=1	W7TRA6_9STRA	Naga_100002g74	38 kDa	5	0.33	0.0001	16.32	16.22	16.08	16.06	16.46	16.49	16.51	16.54	0.1416	0.045	-0.1036	-0.1172	0.304	0.3173	0.338	0.3686
668	Uncharacterized protein OS=Nannochloropsis gaditana GN=Naga_102791g1 PE=4 SV=1	W7THJ1_9STRA	Naga_102791g1	11 kDa	4	0.36	0.0001	16.3	16.2	16.23	16.21	16.54	16.55	16.59	16.72	0.0626	-0.0409	-0.0051	-0.0306	0.302	0.3193	0.3537	0.4987
669	Catalase OS=Nannochloropsis gaditana GN=CAT PE=3 SV=1	W7T2K9_9STRA	CAT	57 kDa	31	-0.18	0.0001	16.04	15.98	16.02	16.08	15.87	15.79	15.89	15.86	0.0013	-0.0495	-0.0039	0.0562	-0.1553	-0.2304	-0.1328	-0.1627
670	Thioredoxin OS=Nannochloropsis gaditana GN=Naga_100044g8 PE=4 SV=1	W7TX40_9STRA	Naga_100044g8	17 kDa	22	0.4	0.0001	14.75	14.88	14.77	14.79	15.17	15.1	15.27	15.25	-0.0464	0.082	-0.0431	-0.0076	0.3552	0.2797	0.4542	0.4379
671	Large subunit ribosomal protein L31e OS=Nannochloropsis gaditana (strain CCMP526) GN=RP-L31E PE=4 SV=1	K8YY51_NANGC (+1)	RP-L31E	13 kDa	13	-0.28	0.0001	18.61	18.43	18.61	18.52	18.2	18.39	18.32	18.15	0.0783	-0.1117	0.0708	-0.0248	-0.3309	-0.1643	-0.2226	-0.399
672	Small gtp-binding protein OS=Nannochloropsis gaditana GN=Rab6 PE=4 SV=1	W7U9T7_9STRA	Rab6	35 kDa	18	0.21	0.0001	16.11	15.97	16.02	16.01	16.3	16.09	16.29	16.24	0.0716	-0.0655	-0.0132	-0.0194	0.2639	0.0583	0.2519	0.2117
673	PolyU-binding-splicing factor PUF60 OS=Nannochloropsis gaditana GN=Naga_100015g10 PE=4 SV=1	W7U4B1_9STRA	Naga_100015g10	56 kDa	10	0.24	0.0001	15.52	15.57	15.47	15.59	15.8	15.72	15.84	15.73	-0.0191	0.0374	-0.0715	0.0486	0.2625	0.1847	0.306	0.1905
674	Uncharacterized protein OS=Nannochloropsis gaditana GN=Naga_100808g2 PE=4 SV=1	W7T848_9STRA	Naga_100808g2	24 kDa	16	-0.19	0.0001	16.07	15.85	15.87	15.77	15.87	15.68	15.57	15.61	0.1927	-0.0275	-0.0138	-0.1092	-0.008	-0.2008	-0.3111	-0.2811
675	High density lipoprotein binding protein vigilin OS=Nannochloropsis gaditana GN=Naga_100039g26 PE=4 SV=1	W7TEY7_9STRA	Naga_100039g26	158 kDa	47	0.1	0.0001	15.85	15.74	15.98	15.98	16	15.97	16.01	16.02	-0.0414	-0.1618	0.0885	0.0926	0.1149	0.0755	0.1107	0.1197
676	Cytochrome c peroxidase OS=Nannochloropsis gaditana GN=Naga_100114g12 PE=3 SV=1	W7UA94_9STRA	Naga_100114g12	44 kDa	10	0.17	0.0001	16.66	16.55	16.47	16.44	16.7	16.67	16.75	16.68	0.1233	0.0174	-0.0628	-0.0941	0.1835	0.1468	0.227	0.1555
677	Acylaminoacyl peptidase OS=Nannochloropsis gaditana GN=Naga_100205g8 PE=4 SV=1	W7TQD5_9STRA	Naga_100205g8	78 kDa	21	0.17	0.0001	16.33	16.33	16.4	16.31	16.5	16.52	16.5	16.51	-0.0143	-0.0158	0.0546	-0.0301	0.1614	0.1739	0.1537	0.165
678	Mitochondrial trna import complex OS=Nannochloropsis gaditana GN=Naga_100002g111 PE=4 SV=1	W7U788_9STRA	Naga_100002g111	16 kDa	22	0.21	0.0001	16.42	16.39	16.37	16.31	16.57	16.45	16.63	16.65	0.0517	0.0206	0.0029	-0.0672	0.2001	0.0787	0.2478	0.2747
679	Farnesyl-diphosphate farnesyltransferase OS=Nannochloropsis gaditana GN=IDI1 PE=4 SV=1	W7U0X7_9STRA	IDI1	95 kDa	6	0.4	0.0001	15.22	15.34	15.52	15.42	15.67	15.64	15.92	15.95	-0.1419	-0.0407	0.1362	0.0438	0.2894	0.2561	0.5193	0.5662
680	Uncharacterized protein OS=Nannochloropsis gaditana GN=Naga_100380g2 PE=4 SV=1	W7SZF4_9STRA	Naga_100380g2	64 kDa	5	0.41	0.0001	15.74	15.4	15.42	15.59	16.03	15.78	16.05	15.97	0.1927	-0.1492	-0.1291	0.0461	0.4852	0.2375	0.5113	0.4388
681	Asparaginyl-trna synthetase OS=Nannochloropsis gaditana GN=ASNRS PE=3 SV=1	W7TB32_9STRA	ASNRS	85 kDa	23	0.2	0.0001	15.82	15.82	16.07	16.04	16.05	16.07	16.26	16.2	-0.1096	-0.1279	0.1199	0.0937	0.0886	0.1217	0.3179	0.2545
682	Putative serca-type calcium atpase OS=Nannochloropsis gaditana GN=Naga_100222g2 PE=3 SV=1	W7TYH4_9STRA	Naga_100222g2	126 kDa	31	0.14	0.0001	15.45	15.51	15.57	15.57	15.58	15.62	15.75	15.73	-0.0833	-0.0229	0.0372	0.0351	0.0537	0.0968	0.2194	0.2034
683	Aspartate aminotransferase OS=Nannochloropsis gaditana GN=Naga_100027g55 PE=4 SV=1	W7TUK0_9STRA	Naga_100027g55	53 kDa	26	-0.23	0.0001	15.27	15.27	15.25	15.32	15	15.11	15	15.05	0.0071	0.002	-0.0269	0.0404	-0.2843	-0.1577	-0.2741	-0.2229
684	Uncharacterized protein OS=Nannochloropsis gaditana GN=Naga_100007g118 PE=4 SV=1	W7U8S2_9STRA	Naga_100007g118	43 kDa	7	-0.52	0.0001	16.76	16.86	16.79	16.76	16.26	16.12	16.26	16.42	-0.0549	0.0667	0.0053	-0.0335	-0.5368	-0.6552	-0.5412	-0.3758
685	Uncharacterized protein OS=Nannochloropsis gaditana GN=Naga_100475g1 PE=4 SV=1	W7TJS6_9STRA	Naga_100475g1	16 kDa	38	-0.17	0.0001	16.98	16.81	16.68	16.59	16.64	16.71	16.55	16.46	0.2249	0.0561	-0.0799	-0.1725	-0.1211	-0.0557	-0.2199	-0.3081
686	Nucleoside diphosphate-linked moiety x motif 6 OS=Nannochloropsis gaditana (strain CCMP526) GN=NGA_0159701 PE=3 SV=1	K8Z7W9_NANGC (+1)	NGA_0159701	42 kDa	11	0.26	0.0001	15.56	15.78	15.77	15.68	15.86	15.96	15.98	16.1	-0.1728	0.0708	0.0483	-0.0345	0.1388	0.2535	0.2842	0.4157
687	Gephyrin (Fragment) OS=Nannochloropsis gaditana (strain CCMP526) GN=NGATSA_3029800 PE=2 SV=1	I2CRJ2_NANGC	NGATSA_3029800	24 kDa	7	0.26	0.0001	15.88	15.98	16.08	16.04	16.37	16.11	16.27	16.31	-0.143	-0.0283	0.0721	0.0306	0.3597	0.1065	0.253	0.3042
688	Fkbp-type peptidyl-prolyl cis-trans isomerase OS=Nannochloropsis gaditana GN=Naga_100182g5 PE=4 SV=1	W7U710_9STRA	Naga_100182g5	23 kDa	14	0.23	0.0001	16.86	16.82	16.74	16.78	17.15	17.01	17.01	16.92	0.0684	0.0239	-0.0612	-0.0179	0.3417	0.2215	0.2032	0.1143
689	Uncharacterized protein OS=Nannochloropsis gaditana GN=Naga_100008g101 PE=4 SV=1	W7TWS8_9STRA	Naga_100008g101	26 kDa	3	0.81	0.0001	16.66	16.63	16.61	16.73	17.32	17.42	17.46	17.72	0.0064	-0.0312	-0.0498	0.065	0.6337	0.7438	0.7615	1.0267
690	Cop9 signalosome complex subunit 2 OS=Nannochloropsis gaditana GN=Naga_100150g11 PE=4 SV=1	W7U093_9STRA	Naga_100150g11	51 kDa	4	0.36	0.0001	14.73	14.92	15.11	14.88	15.28	15.29	15.17	15.37	-0.1722	0.0148	0.2025	-0.0295	0.3697	0.3803	0.2449	0.4527
691	Glutaredoxin OS=Nannochloropsis gaditana GN=Naga_100006g34 PE=4 SV=1	W7U9W0_9STRA	Naga_100006g34	26 kDa	15	0.32	0.0001	16.14	16.12	16.09	15.97	16.58	16.4	16.41	16.26	0.0677	0.0578	0.0175	-0.1112	0.4856	0.3082	0.3282	0.1876
692	Lysosomal pro-x OS=Nannochloropsis gaditana GN=Naga_100036g28 PE=4 SV=1	W7TPZ5_9STRA	Naga_100036g28	67 kDa	7	0.29	0.0001	15.71	15.78	15.79	15.84	16.06	16.12	16.01	16.09	-0.0923	-0.0021	0.0089	0.0633	0.2889	0.3426	0.2159	0.3011
693	Uracil phosphoribosyltransferase OS=Nannochloropsis gaditana GN=Naga_100116g10 PE=4 SV=1	W7TFG6_9STRA	Naga_100116g10	30 kDa	3	0.57	0.0001	15.79	16.08	16.07	16	16.63	16.41	16.49	16.84	-0.214	0.0772	0.0732	0.0021	0.592	0.4098	0.493	0.8251
694	Uncharacterized protein OS=Nannochloropsis gaditana (strain CCMP526) GN=NGA_2114600 PE=4 SV=1	K8YUW4_NANGC (+1)	NGA_2114600	36 kDa	13	0.23	0.0001	16.59	16.49	16.67	16.63	16.92	16.68	16.91	16.81	0.0026	-0.0979	0.0774	0.0305	0.3116	0.0873	0.299	0.2089
695	Repb family protein (Fragment) OS=Nannochloropsis gaditana (strain CCMP526) GN=NGA_2110900 PE=4 SV=1	K8Z332_NANGC (+1)	NGA_2110900	52 kDa	25	-0.15	0.0001	16.11	16.22	16.13	16.16	15.97	15.92	16.05	16.1	-0.0455	0.0753	-0.026	0.0059	-0.182	-0.2369	-0.105	-0.0478
696	L-ascorbate peroxidase OS=Nannochloropsis gaditana GN=APX PE=3 SV=1	W7TXH6_9STRA	APX	37 kDa	88	-0.16	0.0001	16.65	16.35	16.34	16.34	16.43	16.19	16.19	16.14	0.2669	-0.0497	-0.0584	-0.0593	0.047	-0.2088	-0.2067	-0.2596
697	Rnp domain-containing protein OS=Nannochloropsis gaditana (strain CCMP526) GN=NGATSA_3001800 PE=2 SV=1	I2CPF4_NANGC	NGATSA_3001800	21 kDa	35	0.2	0.0001	16.09	15.83	15.93	15.94	16.29	16.04	16.3	15.89	0.1395	-0.1142	-0.0066	-0.0043	0.3482	0.0858	0.3551	-0.0615
698	Cysteine desulfurase OS=Nannochloropsis gaditana GN=NFS PE=3 SV=1	W7TNL7_9STRA	NFS	59 kDa	8	0.3	0.0001	16.78	16.83	16.93	16.87	17.15	17.11	17.25	17.12	-0.0886	-0.0168	0.0756	0.0091	0.288	0.2533	0.3882	0.2632
699	Svop protein OS=Nannochloropsis gaditana (strain CCMP526) GN=NGA_0221000 PE=4 SV=1	K8Z5G0_NANGC	NGA_0221000	40 kDa	3	-0.41	0.0001	15.13	15.03	15.04	15.15	14.89	14.68	14.65	14.47	0.0396	-0.0587	-0.0466	0.0574	-0.1934	-0.4087	-0.4368	-0.6229
700	Uncharacterized protein OS=Nannochloropsis gaditana GN=Naga_100047g29 PE=4 SV=1	W7TB42_9STRA	Naga_100047g29	31 kDa	5	0.33	0.0001	17.44	17.34	17.43	17.36	17.81	17.59	17.74	17.75	0.042	-0.0538	0.0379	-0.0302	0.4139	0.191	0.3409	0.3402
701	Gdsl lipase acylhydrolase family protein OS=Nannochloropsis gaditana (strain CCMP526) GN=NGA_0626602 PE=4 SV=1	K8YWS8_NANGC (+1)	NGA_0626602	38 kDa	4	0.4	0.0001	16.56	16.36	16.38	16.46	16.95	16.71	16.87	16.88	0.0971	-0.1485	-0.071	-0.0003	0.5505	0.251	0.4154	0.4191
702	Ankyrin repeat protein (Fragment) OS=Nannochloropsis gaditana (strain CCMP526) GN=NGA_2109020 PE=4 SV=1	K8Z551_NANGC (+1)	NGA_2109020	56 kDa	5	0.63	0.0001	13.77	13.76	13.91	14.1	14.78	14.23	14.69	14.45	-0.117	-0.1139	0.0091	0.2099	0.8875	0.3463	0.8398	0.559
703	Eukaryotic translation initiation factor 4b (Fragment) OS=Nannochloropsis gaditana (strain CCMP526) GN=NGATSA_2010800 PE=2 SV=1	I2CP23_NANGC	NGATSA_2010800	60 kDa	11	0.19	0.0001	15.48	15.48	15.65	15.62	15.76	15.78	15.81	15.71	-0.0952	-0.0836	0.0751	0.053	0.1841	0.211	0.2334	0.1438
704	Purple acid phosphatase OS=Nannochloropsis gaditana GN=Naga_100087g23 PE=3 SV=1	W7TFF3_9STRA	Naga_100087g23	65 kDa	4	0.3	0.0001	16.14	16.3	16.28	16.29	16.3	16.73	16.55	16.66	-0.1165	0.0512	0.0244	0.04	0.0473	0.4823	0.3008	0.4075
705	Cop9 signalosome complex subunit 4 (Fragment) OS=Nannochloropsis gaditana GN=Naga_101124g2 PE=4 SV=1	W7TQ54_9STRA	Naga_101124g2	30 kDa	4	0.29	0.0001	15	14.98	15.09	14.93	15.27	15.28	15.27	15.33	-0.0064	-0.0201	0.0883	-0.0697	0.2636	0.2798	0.2768	0.3191
706	Uncharacterized protein OS=Nannochloropsis gaditana (strain CCMP526) GN=NGATSA_2003900 PE=2 SV=1	I2CQP1_NANGC (+1)	NGATSA_2003900	80 kDa	6	0.18	0.0001	16.03	16.13	16.05	16.19	16.2	16.23	16.41	16.32	-0.0716	0.0304	-0.0473	0.0836	0.0963	0.1276	0.3094	0.2146
707	ATP synthase subunit alpha, chloroplastic OS=Nannochloropsis gaditana GN=atpA PE=3 SV=1	K9ZV71_9STRA	atpA	55 kDa	214	-0.16	0.0001	15.59	15.55	15.51	15.6	15.57	15.38	15.26	15.39	0.0344	-0.0125	-0.0506	0.0423	0.0243	-0.1882	-0.3069	-0.1687
708	Homoserine kinase OS=Nannochloropsis gaditana GN=Naga_100035g25 PE=3 SV=1	W7UAU3_9STRA	Naga_100035g25	45 kDa	18	0.15	0.0001	15.87	15.97	16.16	16.14	16.09	16.21	16.2	16.25	-0.193	-0.0732	0.111	0.1025	0.05	0.1771	0.1584	0.2124
709	Nadh dehydrogenase subunit 11 OS=Nannochloropsis gaditana GN=Naga_100210g4 PE=4 SV=1	W7UBW7_9STRA	Naga_100210g4	35 kDa	24	0.21	0.0001	15.86	15.81	15.85	15.9	16.08	15.98	16.23	15.98	0.0043	-0.0548	-0.0067	0.0409	0.2285	0.1249	0.3809	0.1184
710	Uncharacterized protein OS=Nannochloropsis gaditana GN=Naga_100004g28 PE=4 SV=1	W7TXH1_9STRA	Naga_100004g28	86 kDa	13	0.19	0.0001	16.46	16.48	16.68	16.62	16.76	16.74	16.8	16.7	-0.117	-0.0869	0.1101	0.0492	0.1895	0.1808	0.2249	0.1405
711	NADH dehydrogenase (Ubiquinone) 1 alpha subcomplex 2 OS=Nannochloropsis gaditana (strain CCMP526) GN=NDUFA2 PE=4 SV=1	K8Z0F8_NANGC (+1)	NDUFA2	14 kDa	14	0.2	0.0001	16.46	16.31	16.38	16.35	16.64	16.46	16.7	16.57	0.0687	-0.0584	0.0046	-0.026	0.2669	0.0814	0.3113	0.1884
712	Large subunit ribosomal protein L8e OS=Nannochloropsis gaditana (strain CCMP526) GN=NGATSA_3041300 PE=2 SV=1	I2CPH3_NANGC	NGATSA_3041300	28 kDa	47	-0.21	0.0001	15.46	15.46	15.5	15.48	15.18	15.35	15.34	15.19	-0.0301	-0.0178	0.0368	0.0121	-0.3021	-0.1149	-0.1368	-0.2775
713	40s ribosomal protein s18 OS=Nannochloropsis gaditana GN=Naga_100113g12 PE=3 SV=1	W7TCB7_9STRA	Naga_100113g12	30 kDa	48	-0.16	0.0001	16.75	16.94	16.97	16.94	16.51	16.82	16.81	16.76	-0.1603	0.0411	0.0657	0.0361	-0.3827	-0.0787	-0.0875	-0.1417
714	LL-diaminopimelate aminotransferase OS=Nannochloropsis gaditana (strain CCMP526) GN=NGA_0115010 PE=3 SV=1	K8YQI7_NANGC (+1)	NGA_0115010	48 kDa	50	-0.1	0.0001	16.44	16.34	16.26	16.3	16.34	16.25	16.25	16.12	0.1097	0.0124	-0.0719	-0.0324	0.0027	-0.0847	-0.085	-0.2069
715	Cdc37 protein OS=Nannochloropsis gaditana GN=Naga_100062g25 PE=4 SV=1	W7TC69_9STRA	Naga_100062g25	50 kDa	9	0.26	0.0001	15.9	15.99	15.86	15.88	16.29	16.14	16.08	16.18	-0.021	0.0846	-0.0468	-0.0267	0.3681	0.2304	0.1738	0.2683
716	Uncharacterized protein OS=Nannochloropsis gaditana GN=Naga_100019g52 PE=4 SV=1	W7TL97_9STRA	Naga_100019g52	24 kDa	8	-0.91	0.0001	15.54	15.8	15.52	15.52	14.52	14.95	14.44	14.78	-0.0483	0.2174	-0.0697	-0.0589	-1.1103	-0.6148	-1.1117	-0.866
717	Cleavage/polyadenylation specificity factor subunit A (Fragment) OS=Nannochloropsis gaditana GN=Naga_101715g1 PE=4 SV=1	W7TUV3_9STRA	Naga_101715g1	34 kDa	4	0.26	0.0001	16.3	16.38	16.51	16.55	16.71	16.61	16.71	16.76	-0.1367	-0.0575	0.0717	0.1118	0.2816	0.1662	0.2714	0.3251
718	4-hydroxy-3-methylbut-2-enyl diphosphate reductase OS=Nannochloropsis gaditana GN=IDS PE=3 SV=1	W7TLS9_9STRA	IDS	53 kDa	18	-0.29	0.0001	15.73	15.71	15.68	15.68	15.29	15.35	15.51	15.51	0.0286	0.0273	-0.0018	-0.0154	-0.4114	-0.3333	-0.185	-0.1695
719	Chaperonin OS=Nannochloropsis gaditana GN=Naga_100995g1 PE=3 SV=1	W7TJQ1_9STRA	Naga_100995g1	42 kDa	9	-0.32	0.0001	16.15	15.99	16.14	15.96	15.84	15.89	15.62	15.61	0.083	-0.0566	0.0802	-0.097	-0.2228	-0.1704	-0.4351	-0.4445
720	Cluster of Sodium hydrogen exchanger 8 OS=Nannochloropsis gaditana GN=Naga_100823g1 PE=4 SV=1 (W7TNK5_9STRA)	W7TNK5_9STRA [2]	Naga_100823g1	72 kDa	5	0.86	0.0001	13.3	13.55	13.76	13.86	14.53	14.42	14.72	14.48	-0.2716	-0.1545	0.1055	0.161	0.7297	0.5728	0.8432	0.6222
721	Uncharacterized protein OS=Nannochloropsis gaditana GN=Naga_101672g1 PE=4 SV=1	W7TV18_9STRA	Naga_101672g1	8 kDa	6	-0.44	0.0001	16.22	16.13	15.95	16.01	15.51	15.54	15.72	15.81	0.1309	0.0444	-0.1387	-0.074	-0.5653	-0.551	-0.3768	-0.2816
722	Serine racemase OS=Nannochloropsis gaditana GN=Naga_100007g34 PE=4 SV=1	W7U8C7_9STRA	Naga_100007g34	41 kDa	7	-0.25	0.0001	16.89	16.98	16.72	16.87	16.55	16.73	16.63	16.49	0.0254	0.1173	-0.1404	0.0038	-0.312	-0.1412	-0.2328	-0.386
723	Atp synthase subunit delta OS=Nannochloropsis gaditana GN=Naga_100038g29 PE=3 SV=1	W7TUP5_9STRA	Naga_100038g29	18 kDa	18	0.21	0.0001	16.19	16.08	16.05	15.97	16.57	16.11	16.28	16.2	0.1248	0.0081	-0.0227	-0.1024	0.4915	0.0422	0.2051	0.1255
724	Coatomer subunit alpha OS=Nannochloropsis gaditana GN=Naga_100014g55 PE=4 SV=1	W7TRK7_9STRA	Naga_100014g55	141 kDa	48	0.09	0.0001	15.67	15.59	15.67	15.66	15.77	15.7	15.8	15.7	0.0228	-0.0639	0.0166	0.0092	0.1217	0.0515	0.1506	0.0566
725	Wd repeat domain phosphoinositide-interacting protein 3 OS=Nannochloropsis gaditana GN=Naga_100009g91 PE=4 SV=1	W7U6T1_9STRA	Naga_100009g91	46 kDa	6	0.33	0.0001	16.34	16.43	16.49	16.47	16.74	16.82	16.71	16.79	-0.1012	-0.0173	0.0542	0.0376	0.316	0.3853	0.2794	0.3869
726	Uncharacterized protein OS=Nannochloropsis gaditana (strain CCMP526) GN=NGA_0673800 PE=4 SV=1	K8YPW3_NANGC	NGA_0673800	68 kDa	21	0.28	0.00011	16.35	16.38	16.22	16.42	16.7	16.66	16.57	16.62	-0.0107	0.0313	-0.1237	0.0678	0.3625	0.2933	0.2007	0.2654
727	60s ribosomal protein l23 (Fragment) OS=Nannochloropsis gaditana GN=Naga_101283g2 PE=4 SV=1	W7TRB9_9STRA	Naga_101283g2	18 kDa	18	-0.2	0.00011	16.89	16.89	16.65	16.77	16.63	16.62	16.68	16.44	0.0948	0.0956	-0.1395	-0.0388	-0.1752	-0.1888	-0.1218	-0.355
728	Dna replication factor c subunit OS=Nannochloropsis gaditana GN=Naga_100080g2 PE=4 SV=1	W7TMJ2_9STRA	Naga_100080g2	28 kDa	4	0.22	0.00011	15.91	15.94	15.89	16	16.12	16.08	16.24	16.18	-0.0292	0.0079	-0.041	0.0617	0.1862	0.1416	0.2978	0.2461
729	4-nitrophenyl phosphatase OS=Nannochloropsis gaditana (strain CCMP526) GN=NGA_0094200 PE=4 SV=1	K8YQS9_NANGC (+1)	NGA_0094200	34 kDa	17	-0.25	0.00011	15.32	15.31	15.01	15.07	15.03	14.88	14.92	14.85	0.138	0.1373	-0.1861	-0.1115	-0.1551	-0.3026	-0.2685	-0.3415
730	Uncharacterized protein OS=Nannochloropsis gaditana GN=Naga_100260g2 PE=4 SV=1	W7TEE7_9STRA	Naga_100260g2	38 kDa	7	0.4	0.00011	15.88	15.94	15.97	15.92	16.3	16.25	16.41	16.35	-0.0864	0.0007	0.0406	-0.0165	0.3727	0.3236	0.4779	0.4153
731	2-hydroxy-3-oxopropionate reductase OS=Nannochloropsis gaditana GN=Naga_100039g13 PE=4 SV=1	W7TNX4_9STRA	Naga_100039g13	33 kDa	12	0.44	0.00012	16.45	16.58	16.42	16.35	16.94	16.85	16.93	16.83	-0.0022	0.1414	-0.025	-0.1002	0.4976	0.4099	0.4581	0.3748
732	Tyrosine--tRNA ligase OS=Nannochloropsis gaditana GN=Naga_100011g15 PE=3 SV=1	W7T7T0_9STRA	Naga_100011g15	60 kDa	10	0.2	0.00012	15.19	15.15	15.25	15.2	15.46	15.27	15.4	15.47	-0.004	-0.0362	0.0482	0.0038	0.2663	0.0707	0.1966	0.2812
733	Uncharacterized protein OS=Nannochloropsis gaditana (strain CCMP526) GN=NGA_0331800 PE=4 SV=1	K8YNP2_NANGC (+1)	NGA_0331800	48 kDa	8	0.26	0.00012	15.25	15.18	15.21	15.19	15.4	15.53	15.47	15.46	0.036	-0.0267	0.0044	-0.0123	0.2086	0.32	0.2553	0.2631
734	Nadh:ubiquinone oxidoreductase complex i intermediate-associated protein 30 OS=Nannochloropsis gaditana (strain CCMP526) GN=NGA_0130700 PE=4 SV=1	K8YQM7_NANGC	NGA_0130700	110 kDa	16	0.3	0.00012	16.05	16.18	16.3	16.23	16.35	16.57	16.54	16.53	-0.1523	-0.017	0.1112	0.0307	0.1475	0.3735	0.3442	0.348
735	Lysophospholipase-like protein OS=Nannochloropsis gaditana GN=Naga_100097g16 PE=4 SV=1	W7TTI2_9STRA	Naga_100097g16	47 kDa	8	0.29	0.00012	16.08	15.97	16.34	16.24	16.25	16.52	16.53	16.52	-0.0779	-0.1934	0.1838	0.0767	0.0904	0.3565	0.3724	0.3585
736	Splicing factor 3b subunit 1 OS=Nannochloropsis gaditana GN=Naga_100027g56 PE=4 SV=1	W7TUJ2_9STRA	Naga_100027g56	146 kDa	14	0.17	0.00012	15.45	15.43	15.49	15.56	15.67	15.58	15.71	15.64	-0.0322	-0.047	0.0064	0.0838	0.1929	0.102	0.2252	0.1597
737	Amidohydrolase 2 OS=Nannochloropsis gaditana GN=Naga_100001g186 PE=4 SV=1	W7U1V5_9STRA	Naga_100001g186	44 kDa	15	0.21	0.00013	16.83	16.7	16.72	16.65	16.97	17	16.9	16.83	0.1102	-0.0241	-0.0023	-0.0685	0.2613	0.2808	0.1848	0.1066
738	Glucose-6-phosphate 1-dehydrogenase OS=Nannochloropsis gaditana GN=G6PDH PE=3 SV=1	W7TZ08_9STRA	G6PDH	62 kDa	21	0.15	0.00013	16.23	16.39	16.33	16.34	16.54	16.55	16.42	16.4	-0.0914	0.0637	0.0121	0.0097	0.2119	0.233	0.0908	0.0765
739	Uncharacterized protein (Fragment) OS=Nannochloropsis gaditana GN=Naga_101378g2 PE=4 SV=1	W7T8S9_9STRA	Naga_101378g2	21 kDa	4	0.27	0.00013	16.4	16.31	16.42	16.35	16.6	16.6	16.71	16.69	0.0294	-0.0588	0.0548	-0.0213	0.2247	0.2215	0.3336	0.32
740	YbaB-like DNA-binding protein OS=Nannochloropsis gaditana GN=Naga_100043g29 PE=4 SV=1	W7TS67_9STRA	Naga_100043g29	26 kDa	18	-0.23	0.00013	16.35	16.06	15.96	15.99	15.94	15.94	15.73	15.7	0.3019	0.0027	-0.1015	-0.0761	-0.1162	-0.1202	-0.3208	-0.3483
741	Heat shock protein (Fragment) OS=Nannochloropsis gaditana (strain CCMP526) GN=NGATSA_3010300 PE=2 SV=1	I2CQW5_NANGC (+2)	NGATSA_3010300	29 kDa	4	0.31	0.00013	14.26	14.2	14.51	14.5	14.6	14.62	14.8	14.76	-0.1183	-0.192	0.1379	0.1131	0.2138	0.2454	0.4162	0.3747
742	Ketose-bisphosphate aldolase class-ii-like protein OS=Nannochloropsis gaditana GN=Naga_100241g5 PE=4 SV=1	W7U1F4_9STRA	Naga_100241g5	88 kDa	10	0.21	0.00014	16.26	16.34	16.44	16.42	16.51	16.58	16.58	16.62	-0.0996	-0.03	0.0777	0.0537	0.1347	0.2203	0.2127	0.2629
743	Transmembrane protein OS=Nannochloropsis gaditana GN=Naga_100013g44 PE=4 SV=1	W7TTE9_9STRA	Naga_100013g44	30 kDa	7	-0.37	0.00014	16.05	15.66	15.73	15.55	15.5	15.56	15.25	15.1	0.3162	-0.0643	0.0002	-0.1894	-0.2501	-0.1816	-0.497	-0.6353
744	Coatomer subunit epsilon OS=Nannochloropsis gaditana (strain CCMP526) GN=NGA_0120800 PE=4 SV=1	K8YQS7_NANGC	NGA_0120800	30 kDa	11	0.18	0.00014	16.76	16.5	16.61	16.58	16.97	16.72	16.75	16.76	0.1553	-0.1127	0.006	-0.0272	0.3585	0.1137	0.1389	0.1431
745	Uncharacterized protein OS=Nannochloropsis gaditana GN=Naga_100109g12 PE=4 SV=1	W7U672_9STRA	Naga_100109g12	57 kDa	5	0.38	0.00014	16.58	16.68	16.62	16.61	17.01	16.76	17.24	17.09	-0.0565	0.0293	-0.0037	-0.0038	0.4097	0.1434	0.6326	0.5177
746	Atp-dependent hsl protease atp-binding subunit hslu OS=Nannochloropsis gaditana GN=Naga_100021g53 PE=4 SV=1	W7TQM4_9STRA	Naga_100021g53	65 kDa	26	0.23	0.00014	15.92	15.86	16	15.97	16.18	16.2	16.1	16.15	-0.0108	-0.0855	0.0607	0.0279	0.25	0.263	0.1635	0.2196
747	Uncharacterized protein OS=Nannochloropsis gaditana (strain CCMP526) GN=NGA_0121000 PE=4 SV=1	K8Z5D5_NANGC	NGA_0121000	42 kDa	16	0.16	0.00014	16.06	15.8	16.1	16.01	16.08	16.19	16.17	16.14	0.0578	-0.1853	0.1029	0.0209	0.0952	0.2013	0.1745	0.1589
748	Arabinose 5-phosphate isomerase OS=Nannochloropsis gaditana GN=Naga_100051g33 PE=4 SV=1	W7T4A1_9STRA	Naga_100051g33	65 kDa	9	0.29	0.00014	16.73	16.59	16.89	16.91	17.17	16.86	17.19	17.16	-0.0495	-0.198	0.1039	0.1223	0.3991	0.0758	0.4141	0.3817
749	Uncharacterized protein OS=Nannochloropsis gaditana GN=Naga_100158g9 PE=4 SV=1	W7TIG6_9STRA	Naga_100158g9	34 kDa	3	-0.61	0.00014	16.3	15.98	15.95	15.96	15.39	15.65	15.38	15.3	0.2595	-0.0584	-0.0891	-0.0812	-0.5862	-0.3852	-0.6591	-0.7551
750	Uncharacterized protein (Fragment) OS=Nannochloropsis gaditana GN=Naga_101190g1 PE=4 SV=1	W7TP48_9STRA	Naga_101190g1	19 kDa	7	-0.27	0.00014	17.23	17.19	17.09	17.17	16.95	16.86	17	16.8	0.0603	0.0192	-0.0821	-0.0002	-0.2253	-0.3163	-0.1518	-0.3644
751	Cysteine synthase OS=Nannochloropsis gaditana GN=Naga_100079g12 PE=3 SV=1	W7TLT5_9STRA	Naga_100079g12	43 kDa	56	-0.15	0.00015	15.2	15.06	15	14.98	15.01	14.99	14.78	14.83	0.1441	0.0013	-0.0523	-0.0821	-0.0497	-0.059	-0.2679	-0.2104
752	Uncharacterized protein OS=Nannochloropsis gaditana (strain CCMP526) GN=NGATSA_3023900 PE=2 SV=1	I2CPL5_NANGC	NGATSA_3023900	23 kDa	24	-0.19	0.00015	16.34	16.16	16.14	16.1	16.12	15.95	15.93	15.91	0.1953	-0.0071	-0.0254	-0.0676	-0.0246	-0.237	-0.2466	-0.2546
753	Rubisco LS methyltransferase, substrate-binding domain protein (Fragment) OS=Nannochloropsis gaditana GN=Naga_100543g4 PE=4 SV=1	W7TY73_9STRA	Naga_100543g4	20 kDa	6	0.38	0.00015	14.74	14.7	14.9	14.76	15.12	15.12	15.16	15.2	-0.056	-0.0831	0.1248	-0.0299	0.3589	0.3226	0.3814	0.4247
754	EF-Hand 1, calcium-binding site OS=Nannochloropsis gaditana GN=Naga_100070g21 PE=4 SV=1	W7TMJ4_9STRA	Naga_100070g21	451 kDa	13	0.2	0.00016	15.27	15.23	15.34	15.38	15.4	15.42	15.54	15.67	-0.0313	-0.0751	0.0354	0.0721	0.0893	0.1154	0.2333	0.3652
755	Heparanase-like protein 3 OS=Nannochloropsis gaditana GN=Naga_100068g13 PE=4 SV=1	W7TXC9_9STRA	Naga_100068g13	70 kDa	12	0.36	0.00016	16.55	16.57	16.49	16.55	16.96	16.81	16.85	16.93	0.0085	0.0174	-0.0527	0.0133	0.4196	0.2699	0.3098	0.3908
756	Abc transporter OS=Nannochloropsis gaditana GN=Naga_100145g11 PE=4 SV=1	W7TJJ2_9STRA	Naga_100145g11	102 kDa	22	0.15	0.00016	16.43	16.4	16.57	16.48	16.5	16.63	16.68	16.7	-0.0397	-0.077	0.1016	0.0098	0.0234	0.1596	0.2168	0.2365
757	Lactoylglutathione lyase OS=Nannochloropsis gaditana (strain CCMP526) GN=NGA_0496500 PE=4 SV=1	K8Z959_NANGC	NGA_0496500	19 kDa	14	0.27	0.00016	14.14	14.04	14.27	14.01	14.42	14.26	14.4	14.47	0.0254	-0.0687	0.1629	-0.118	0.3022	0.1388	0.2811	0.3598
758	Phenylalanyl-trna synthetase OS=Nannochloropsis gaditana GN=Naga_100002g38 PE=4 SV=1	W7TNG4_9STRA	Naga_100002g38	50 kDa	19	-0.26	0.00016	16.37	16.32	16.19	16.26	15.89	16.05	16.12	16.03	0.0855	0.0384	-0.0961	-0.0223	-0.3905	-0.236	-0.1651	-0.2499
759	Vacuolar protein sorting-associated protein 33-like protein OS=Nannochloropsis gaditana GN=Naga_100009g54 PE=3 SV=1	W7TR05_9STRA	Naga_100009g54	83 kDa	3	0.22	0.00016	17.07	17.02	17.12	17.11	17.3	17.29	17.34	17.27	-0.0194	-0.0595	0.039	0.0325	0.217	0.2029	0.2569	0.1859
760	Ccaat-box binding factor hap3 OS=Nannochloropsis gaditana GN=Naga_100008g90 PE=4 SV=1	W7U5H0_9STRA	Naga_100008g90	20 kDa	4	0.35	0.00016	16.29	16.51	16.46	16.56	16.75	16.89	16.8	16.76	-0.1739	0.0543	0.0016	0.1025	0.2885	0.4311	0.3357	0.3077
761	Uncharacterized protein OS=Nannochloropsis gaditana GN=Naga_100179g1 PE=4 SV=1	W7UBB4_9STRA	Naga_100179g1	42 kDa	8	0.71	0.00016	13.25	12.86	13.27	13.81	14.19	13.66	14	14.23	-0.0975	-0.4858	-0.0682	0.4805	0.8826	0.3295	0.6594	0.8946
762	Small subunit ribosomal protein S7e OS=Nannochloropsis gaditana (strain CCMP526) GN=RP-S7E PE=4 SV=1	K8Z3Y6_NANGC (+1)	RP-S7E	22 kDa	34	-0.13	0.00017	16.93	17.06	17.09	17.05	16.86	16.92	16.93	16.91	-0.1166	0.022	0.039	0.0047	-0.1892	-0.1206	-0.1139	-0.1244
763	Alkyl sulfatase or beta-lactamase OS=Nannochloropsis gaditana GN=Naga_100017g75 PE=4 SV=1	W7UAM2_9STRA	Naga_100017g75	71 kDa	21	0.24	0.00017	15.44	15.48	15.63	15.71	15.69	15.77	15.9	15.9	-0.1252	-0.0936	0.0668	0.1504	0.1286	0.2125	0.3357	0.3256
764	Violaxanthin de-epoxidase OS=Nannochloropsis gaditana (strain CCMP526) GN=VDE PE=4 SV=1	K8Z7V3_NANGC (+1)	VDE	58 kDa	20	0.17	0.00017	16.36	16.31	16.25	16.25	16.67	16.53	16.34	16.31	0.0824	0.0286	-0.0395	-0.0425	0.3814	0.2384	0.063	0.0174
765	Photosystem II PsbP, oxygen evolving complex OS=Nannochloropsis gaditana GN=psbP PE=4 SV=1	W7TH67_9STRA	psbP	29 kDa	11	0.31	0.00018	13.85	13.73	13.74	13.71	14.24	13.83	14.13	14.02	0.082	-0.0269	-0.0203	-0.065	0.4907	0.0663	0.3861	0.2504
766	Cluster of Ribosomal protein s27a OS=Nannochloropsis gaditana GN=Naga_100305g7 PE=4 SV=1 (W7U9G4_9STRA)	W7U9G4_9STRA [3]	Naga_100305g7	17 kDa	17	-0.48	0.00018	17.46	17.48	17.39	17.41	16.84	17.11	17.02	16.66	0.0407	0.0196	-0.032	-0.0297	-0.5781	-0.2638	-0.3444	-0.6528
767	Putative oxidoreductase ycsn OS=Nannochloropsis gaditana GN=Naga_100043g16 PE=4 SV=1	W7TS54_9STRA	Naga_100043g16	41 kDa	19	0.35	0.00019	15.72	15.9	15.82	15.77	16.25	16.09	16.13	16.18	-0.0902	0.1004	0.0184	-0.0297	0.4454	0.2898	0.3142	0.374
768	Fad-dependent pyridine nucleotide-disulfide oxidoreductase OS=Nannochloropsis gaditana GN=Naga_100012g27 PE=4 SV=1	W7T3V6_9STRA	Naga_100012g27	58 kDa	6	0.29	0.00019	15.01	15.3	15.28	15.17	15.53	15.48	15.39	15.54	-0.1814	0.1113	0.0826	-0.0306	0.3362	0.2864	0.1978	0.348
769	Aldo keto reductase OS=Nannochloropsis gaditana GN=Naga_100082g6 PE=4 SV=1	W7TUH1_9STRA	Naga_100082g6	63 kDa	4	0.5	0.00019	14.32	14.29	14.3	14.22	14.69	14.71	14.99	14.76	0.0356	0.0017	0.0069	-0.0626	0.407	0.3847	0.6804	0.4804
770	Short-chain dehydrogenase reductase sdr OS=Nannochloropsis gaditana (strain CCMP526) GN=NGA_0701800 PE=4 SV=1	K8YWN7_NANGC (+1)	NGA_0701800	30 kDa	13	0.21	0.0002	16.17	16.2	16.18	16.12	16.39	16.41	16.44	16.26	0.0142	0.0303	0.0054	-0.0545	0.2131	0.2466	0.2602	0.1012
771	Exported nucleotide-binding protein (Fragment) OS=Nannochloropsis gaditana (strain CCMP526) GN=NGA_0728400 PE=4 SV=1	K8ZCI2_NANGC	NGA_0728400	36 kDa	10	0.45	0.0002	17.11	16.89	17.44	17.44	17.72	17.43	17.68	18.05	-0.1532	-0.3446	0.1851	0.1918	0.4473	0.1858	0.4344	0.795
772	Malic enzyme OS=Nannochloropsis gaditana GN=Naga_100014g76 PE=3 SV=1	W7TGF1_9STRA	Naga_100014g76	66 kDa	18	0.19	0.00021	16.23	16.16	16.07	16.08	16.32	16.43	16.36	16.17	0.0937	0.0244	-0.0592	-0.0505	0.1782	0.2957	0.2271	0.0364
773	Lamin Tail domain protein OS=Nannochloropsis gaditana GN=Naga_100016g16 PE=4 SV=1	W7TNN4_9STRA	Naga_100016g16	50 kDa	3	0.31	0.00021	13.78	13.72	13.73	13.66	13.85	14.04	13.98	14.3	0.0594	0.0028	-0.0008	-0.0605	0.125	0.3184	0.259	0.5849
774	Glutathione transferase OS=Nannochloropsis gaditana GN=Naga_100199g10 PE=4 SV=1	W7TNY9_9STRA (+1)	Naga_100199g10	49 kDa	8	0.45	0.00021	15.25	15.4	15.34	15.32	15.85	15.78	15.75	15.75	-0.1481	0.0643	-0.0027	-0.0075	0.4817	0.4566	0.3866	0.4123
775	Estradiol 17-beta-dehydrogenase 12 OS=Nannochloropsis gaditana GN=Naga_100044g17 PE=3 SV=1	W7TPT4_9STRA	Naga_100044g17	39 kDa	8	-0.22	0.00021	16.49	16.61	16.57	16.7	16.34	16.3	16.44	16.4	-0.1019	0.0157	-0.0191	0.1028	-0.2577	-0.2955	-0.1475	-0.2005
776	Lipocalin protein OS=Nannochloropsis gaditana GN=Naga_100131g14 PE=4 SV=1	W7TQX7_9STRA	Naga_100131g14	29 kDa	5	1.02	0.00021	15.5	15.37	15.39	15.44	16.45	16.12	16.32	16.88	0.0993	-0.0768	-0.0268	0.0143	1.0368	0.6602	0.8938	1.4681
777	Delta( )-delta( )-dienoyl-mitochondrial-like protein OS=Nannochloropsis gaditana GN=Naga_100009g108 PE=4 SV=1	W7TYL9_9STRA	Naga_100009g108	34 kDa	5	0.26	0.00022	16.22	16.24	16.19	16.17	16.65	16.5	16.45	16.37	0.009	0.0367	-0.0151	-0.0387	0.457	0.2967	0.2355	0.1639
778	Proteasome subunit alpha type OS=Nannochloropsis gaditana GN=Naga_100809g1 PE=3 SV=1	W7U026_9STRA	Naga_100809g1	27 kDa	33	0.12	0.00022	16.31	16.21	16.14	16.19	16.36	16.33	16.36	16.27	0.0895	-0.0011	-0.0668	-0.0245	0.1445	0.1185	0.1534	0.064
779	Abc1 protein kinase OS=Nannochloropsis gaditana GN=Naga_100001g206 PE=4 SV=1	W7U111_9STRA	Naga_100001g206	74 kDa	18	0.18	0.00022	16.34	16.44	16.42	16.45	16.54	16.57	16.67	16.64	-0.0923	0.0243	0.0046	0.0361	0.1195	0.159	0.2589	0.2212
780	26s proteasome non-atpase regulatory subunit 9 OS=Nannochloropsis gaditana GN=Naga_100213g2 PE=4 SV=1	W7TDY4_9STRA	Naga_100213g2	28 kDa	8	0.24	0.00022	15.26	15.41	15.36	15.31	15.63	15.63	15.51	15.54	-0.0828	0.0734	0.025	-0.0207	0.2943	0.2963	0.1752	0.2035
781	Uncharacterized protein OS=Nannochloropsis gaditana (strain CCMP526) GN=NGA_0434301 PE=4 SV=1	K8Z6M7_NANGC	NGA_0434301	19 kDa	46	0.38	0.00022	15.74	16.1	16.2	16.44	16.46	16.19	16.72	17.16	-0.4198	-0.0526	0.0401	0.2961	0.3056	0.0385	0.5497	0.9905
782	Mitochondrial tricarboxylate carrier family OS=Nannochloropsis gaditana GN=Naga_100027g48 PE=4 SV=1	W7TKI7_9STRA	Naga_100027g48	36 kDa	3	0.34	0.00023	16.13	16.31	16.16	16.4	16.52	16.52	16.78	16.6	-0.1217	0.051	-0.0842	0.147	0.2653	0.2671	0.5303	0.3474
783	Transmembrane emp24 domain trafficking protein 2 OS=Nannochloropsis gaditana (strain CCMP526) GN=NGA_2014900 PE=2 SV=1	I2CR28_NANGC (+1)	NGA_2014900	24 kDa	3	0.33	0.00023	14.04	13.9	14.05	13.93	14.43	14.1	14.33	14.37	0.067	-0.0782	0.0735	-0.0455	0.4665	0.1221	0.3511	0.383
784	Argininosuccinate lyase OS=Nannochloropsis gaditana GN=ASL PE=3 SV=1	W7TLC6_9STRA	ASL	50 kDa	24	0.12	0.00024	15.79	15.99	15.88	15.79	15.95	15.91	16.02	16.04	-0.0747	0.1273	0.0301	-0.0721	0.0926	0.0458	0.1654	0.1831
785	Aldose 1 OS=Nannochloropsis gaditana GN=Naga_100023g48 PE=4 SV=1	W7TQG6_9STRA	Naga_100023g48	34 kDa	16	0.17	0.00024	16.13	16.2	16.15	16.14	16.35	16.36	16.3	16.27	-0.0456	0.0403	-0.0115	-0.0167	0.1965	0.2079	0.1321	0.119
786	Peptidylprolyl isomerase OS=Nannochloropsis gaditana GN=Naga_100016g72 PE=4 SV=1	W7TXQ6_9STRA	Naga_100016g72	26 kDa	20	0.24	0.00024	15.98	16.05	15.99	15.98	16.37	16.19	16.17	16.25	-0.0317	0.0371	-0.0119	-0.0108	0.3626	0.1928	0.1635	0.2509
787	Calreticulin OS=Nannochloropsis gaditana (strain CCMP526) GN=NGATSA_2004500 PE=2 SV=1	I2CP49_NANGC (+2)	NGATSA_2004500	49 kDa	47	-0.14	0.00024	17.91	17.86	17.63	17.71	17.89	17.64	17.58	17.46	0.1487	0.0973	-0.1393	-0.0538	0.1195	-0.1321	-0.1946	-0.3086
788	Uncharacterized protein OS=Nannochloropsis gaditana GN=Naga_100005g93 PE=4 SV=1	W7TGZ2_9STRA	Naga_100005g93	71 kDa	13	-0.23	0.00025	16.14	15.95	16.24	16.23	15.91	15.77	15.89	16.01	-0.0188	-0.1881	0.1046	0.0938	-0.2307	-0.3536	-0.2373	-0.1192
789	Photosystem I iron-sulfur center OS=Nannochloropsis gaditana GN=psaC PE=3 SV=1	K9ZXQ2_9STRA	psaC	9 kDa	31	-0.25	0.00026	16.54	16.15	16.2	16.14	16.06	16.12	15.9	15.62	0.3182	-0.062	-0.0202	-0.0786	-0.1587	-0.0844	-0.3086	-0.6253
790	Homogentisate-dioxygenase OS=Nannochloropsis gaditana GN=Naga_100109g5 PE=4 SV=1	W7TMK1_9STRA	Naga_100109g5	53 kDa	4	0.41	0.00027	15.82	15.81	15.94	15.91	16.16	16.2	16.41	16.33	-0.0573	-0.0691	0.0685	0.0393	0.2668	0.3274	0.5294	0.4596
791	Exportin 1 OS=Nannochloropsis gaditana GN=Naga_100044g24 PE=3 SV=1	W7U618_9STRA	Naga_100044g24	124 kDa	30	0.09	0.00027	16.07	16.1	16.09	16.08	16.16	16.14	16.2	16.2	-0.0026	0.0156	-0.0003	0.0028	0.0736	0.0555	0.1247	0.1199
792	Amine oxidase (Fragment) OS=Nannochloropsis gaditana (strain CCMP526) GN=NGATSA_3019400 PE=2 SV=1	I2CR86_NANGC	NGATSA_3019400	20 kDa	6	0.27	0.00027	15.62	15.66	15.7	15.65	15.75	16.14	15.95	15.92	-0.047	-0.0028	0.0349	-0.0136	0.0949	0.4816	0.2925	0.2748
793	Zinc finger, CCCH-type OS=Nannochloropsis gaditana GN=Naga_100237g7 PE=4 SV=1	W7TJY8_9STRA	Naga_100237g7	101 kDa	6	0.34	0.00027	14.43	14.67	14.61	14.61	14.87	15.1	14.71	14.96	-0.1563	0.0849	0.031	0.0239	0.3019	0.5122	0.1436	0.3696
794	Putative chloroplastic-like protein OS=Nannochloropsis gaditana GN=Naga_100020g25 PE=4 SV=1	W7TB10_9STRA	Naga_100020g25	30 kDa	18	0.3	0.00027	16.43	16.39	16.57	16.49	16.81	16.72	16.78	16.79	-0.0567	-0.0884	0.0914	0.0215	0.3241	0.2441	0.2931	0.3054
795	Uncharacterized protein OS=Nannochloropsis gaditana GN=Naga_100027g8 PE=4 SV=1	W7TAA9_9STRA	Naga_100027g8	21 kDa	4	-0.46	0.00027	15.3	15.29	15.04	14.96	14.72	14.76	14.69	14.51	0.1851	0.154	-0.0969	-0.1754	-0.4677	-0.3758	-0.4581	-0.6098
796	Prohibitin OS=Nannochloropsis gaditana GN=Naga_100018g43 PE=4 SV=1	W7TL69_9STRA	Naga_100018g43	34 kDa	31	0.17	0.00027	16.58	16.45	16.63	16.6	16.63	16.56	16.89	16.81	0.0097	-0.1222	0.0763	0.0353	0.0733	-0.0103	0.3306	0.2432
797	U6 snrna-associated sm-like protein lsm1 OS=Nannochloropsis gaditana GN=LSm1 PE=4 SV=1	W7U1Y4_9STRA	LSm1	40 kDa	5	0.38	0.00028	13.51	13.06	13.38	13.19	13.86	13.7	13.59	13.54	0.2129	-0.2274	0.0958	-0.0977	0.5684	0.4025	0.3018	0.2566
798	Uncharacterized protein (Fragment) OS=Nannochloropsis gaditana (strain CCMP526) GN=NGA_0456500 PE=4 SV=1	K8YW21_NANGC	NGA_0456500	69 kDa	4	0.36	0.00028	16.51	16.65	16.7	16.75	16.96	16.95	16.98	17.19	-0.1541	-0.0038	0.0382	0.098	0.3106	0.2963	0.3265	0.5437
799	Aspartate aminotransferase OS=Nannochloropsis gaditana GN=Naga_100017g28 PE=4 SV=1	W7TUL7_9STRA	Naga_100017g28	55 kDa	9	0.25	0.00028	16.03	16.14	16.31	16.12	16.38	16.38	16.37	16.46	-0.1102	-0.0137	0.1734	-0.0168	0.2453	0.241	0.2386	0.3459
800	Tpr repeat protein OS=Nannochloropsis gaditana GN=Naga_100004g63 PE=4 SV=1	W7TMG9_9STRA	Naga_100004g63	43 kDa	9	0.22	0.00029	15.97	16.04	16.02	15.92	16.23	16.15	16.21	16.25	-0.0341	0.0431	0.0268	-0.0701	0.2382	0.1592	0.2139	0.2628
801	Atpase family aaa domain-containing protein 3 OS=Nannochloropsis gaditana (strain CCMP526) GN=NGA_0333300 PE=4 SV=1	K8YNQ6_NANGC (+1)	NGA_0333300	62 kDa	17	0.14	0.00029	15.68	15.68	15.84	15.8	15.85	15.9	15.94	15.9	-0.086	-0.0714	0.0941	0.0415	0.0922	0.1527	0.1919	0.1491
802	Peptidyl-prolyl cis-trans isomerase OS=Nannochloropsis gaditana GN=Naga_100008g32 PE=4 SV=1	W7U5A0_9STRA	Naga_100008g32	38 kDa	13	0.29	0.0003	16.9	16.96	16.88	16.78	17.27	17.24	17.1	17.09	0.0257	0.0906	0.0082	-0.098	0.3784	0.3432	0.2131	0.2102
803	Uncharacterized protein OS=Nannochloropsis gaditana GN=Naga_100034g32 PE=4 SV=1	W7TKW0_9STRA	Naga_100034g32	28 kDa	9	0.21	0.0003	16.05	16.08	16.02	15.97	16.37	16.19	16.23	16.19	0.0152	0.0555	-0.011	-0.0576	0.3432	0.1569	0.1943	0.1635
804	2-isopropylmalate synthase OS=Nannochloropsis gaditana GN=IPMS2 PE=3 SV=1	W7TP25_9STRA	IPMS2	155 kDa	21	-0.4	0.0003	16.65	16.67	16.63	16.5	16.17	16.36	16.12	16.2	0.0237	0.0778	0.0369	-0.1011	-0.4367	-0.2206	-0.4804	-0.3776
805	Phosphate dikinase OS=Nannochloropsis gaditana GN=Naga_100043g42 PE=4 SV=1	W7T800_9STRA	Naga_100043g42	110 kDa	75	0.17	0.0003	15.56	15.87	15.66	15.66	15.56	16.01	15.83	15.99	-0.1331	0.1797	-0.0418	-0.0313	-0.1286	0.3234	0.1254	0.2978
806	Anoctamin-8-like protein (Fragment) OS=Nannochloropsis gaditana (strain CCMP526) GN=NGATSA_3008400 PE=2 SV=1	I2CPC9_NANGC	NGATSA_3008400	42 kDa	8	0.25	0.00031	15.32	15.44	15.54	15.51	15.62	15.77	15.67	15.8	-0.154	-0.0256	0.0801	0.0639	0.1782	0.3071	0.211	0.3491
807	Set domain containing protein OS=Nannochloropsis gaditana GN=Naga_101047g2 PE=4 SV=1	W7THN2_9STRA	Naga_101047g2	34 kDa	3	0.36	0.00032	16.44	16.43	16.63	16.55	16.76	16.89	16.93	16.9	-0.0826	-0.0918	0.1127	0.0314	0.2305	0.3718	0.4128	0.3803
808	Uncharacterized protein OS=Nannochloropsis gaditana GN=Naga_100129g17 PE=4 SV=1	W7TTQ9_9STRA	Naga_100129g17	29 kDa	4	0.92	0.00033	16.49	16.55	16.49	16.27	17.55	17.33	17.48	17.14	0.0442	0.095	0.0736	-0.1894	1.1196	0.8715	1.0065	0.6756
809	Glutamate decarboxylase OS=Nannochloropsis gaditana GN=Naga_100805g1 PE=3 SV=1	W7TVC7_9STRA	Naga_100805g1	32 kDa	20	0.21	0.00033	16.35	16.63	16.52	16.44	16.67	16.64	16.81	16.72	-0.1169	0.1517	0.0416	-0.063	0.1839	0.1563	0.3146	0.2362
810	Ascorbate peroxidase OS=Nannochloropsis gaditana GN=Naga_101335g1 PE=3 SV=1	W7U0U0_9STRA	Naga_101335g1	18 kDa	31	0.15	0.00033	15.89	15.86	15.81	15.73	16.07	15.86	15.95	15.99	0.0616	0.0394	-0.0111	-0.0959	0.2408	0.0394	0.1219	0.1611
811	F-type H+-transporting ATPase subunit gamma OS=Nannochloropsis gaditana (strain CCMP526) GN=ATPEF1G PE=3 SV=1	K8YYD2_NANGC (+1)	ATPEF1G	31 kDa	53	0.2	0.00034	16.13	16.06	16.21	16.08	16.44	16.2	16.38	16.29	-0.0157	-0.056	0.0861	-0.0616	0.3033	0.076	0.2491	0.1629
812	Smu-1 suppressor of mec-8 and unc-52-like protein (Fragment) OS=Nannochloropsis gaditana (strain CCMP526) GN=NGA_0692800 PE=4 SV=1	K8YWD5_NANGC	NGA_0692800	63 kDa	11	0.23	0.00034	14.3	14.38	14.46	14.39	14.62	14.42	14.72	14.67	-0.0833	-0.0068	0.0755	0.0109	0.2585	0.0375	0.3484	0.296
813	Alcohol dehydrogenase zinc-binding domain protein OS=Nannochloropsis gaditana (strain CCMP526) GN=NGA_0487100 PE=4 SV=1	K8YXY5_NANGC	NGA_0487100	69 kDa	18	0.13	0.00034	16.36	16.46	16.46	16.52	16.55	16.57	16.66	16.54	-0.0936	0.0059	-0.0002	0.0739	0.0977	0.1164	0.2106	0.0939
814	EF-Hand 1, calcium-binding site OS=Nannochloropsis gaditana GN=Naga_100015g2 PE=4 SV=1	W7TVN6_9STRA (+1)	Naga_100015g2	29 kDa	10	0.21	0.00035	15.59	15.5	15.68	15.68	15.77	15.75	15.92	15.9	-0.038	-0.1096	0.056	0.055	0.1352	0.1364	0.291	0.282
815	Beta-glucan synthesis-associated OS=Nannochloropsis gaditana (strain CCMP526) GN=NGA_0318700 PE=4 SV=1	K8YR94_NANGC	NGA_0318700	46 kDa	6	0.36	0.00035	14.86	15	14.98	14.97	15.37	15.22	15.36	15.28	-0.1024	0.0455	0.0237	0.015	0.4249	0.2874	0.4249	0.3266
816	Cytochrome b-c1 complex subunit Rieske, mitochondrial OS=Nannochloropsis gaditana GN=Naga_100021g47 PE=4 SV=1	W7TQL4_9STRA	Naga_100021g47	25 kDa	11	0.26	0.00035	16.46	16.33	16.35	16.39	16.65	16.53	16.7	16.65	0.0801	-0.0445	-0.0312	0.012	0.266	0.1555	0.3194	0.2571
817	Ras-related C3 botulinum toxin substrate 1 OS=Nannochloropsis gaditana (strain CCMP526) GN=NGATSA_3003700 PE=2 SV=1	I2CQQ4_NANGC	NGATSA_3003700	21 kDa	7	0.39	0.00035	17.04	16.73	16.77	16.75	17.42	17.19	17.27	16.83	0.2179	-0.1137	-0.0416	-0.079	0.6031	0.3727	0.4557	0.0011
818	Ferredoxin--NADP reductase OS=Nannochloropsis gaditana (strain CCMP526) GN=PETH PE=3 SV=1	K8YXT7_NANGC	PETH	45 kDa	181	-0.08	0.00035	17.16	16.88	16.88	16.91	17.04	16.84	16.79	16.73	0.2354	-0.0508	-0.0596	-0.0237	0.1005	-0.0964	-0.1505	-0.2128
819	Uncharacterized protein OS=Nannochloropsis gaditana GN=Naga_100021g63 PE=4 SV=1	W7TZG5_9STRA	Naga_100021g63	50 kDa	6	0.34	0.00036	14.96	15.25	15.24	15.23	15.47	15.42	15.49	15.72	-0.2257	0.0706	0.0494	0.0464	0.2908	0.2426	0.3295	0.5394
820	Phosphoesterase pa-phosphatase related protein OS=Nannochloropsis gaditana GN=Naga_100234g7 PE=4 SV=1	W7TCU2_9STRA	Naga_100234g7	170 kDa	4	0.26	0.00036	14.73	14.71	14.69	14.83	14.88	14.92	15.09	15.08	-0.0106	-0.026	-0.0519	0.0891	0.1773	0.192	0.3517	0.3477
821	Anthranilate synthase OS=Nannochloropsis gaditana GN=Naga_100014g9 PE=3 SV=1	W7TZP3_9STRA	Naga_100014g9	67 kDa	12	-0.15	0.00036	16.84	16.88	16.74	16.85	16.66	16.7	16.74	16.62	0.0115	0.0498	-0.0864	0.0207	-0.1703	-0.132	-0.0854	-0.2187
822	ATP synthase subunit c, chloroplastic OS=Nannochloropsis gaditana GN=atpH PE=3 SV=1	K9ZV94_9STRA	atpH	8 kDa	21	-0.29	0.00036	14.87	14.82	15.02	14.94	14.75	14.42	14.64	14.57	-0.0367	-0.0903	0.0966	0.0187	-0.1754	-0.492	-0.3107	-0.3127
823	Regulator of chromosome condensation/beta-lactamase-inhibitor protein II OS=Nannochloropsis gaditana GN=Naga_100053g39 PE=4 SV=1	W7TAD4_9STRA	Naga_100053g39	65 kDa	7	0.26	0.00037	15.84	16	16.12	16.04	16.25	16.3	16.18	16.32	-0.1612	-0.0056	0.1259	0.0331	0.2549	0.2928	0.1777	0.3205
824	ATP-dependent RNA helicase DOB1 OS=Nannochloropsis gaditana (strain CCMP526) GN=NGATSA_3002300 PE=2 SV=1	I2CQP2_NANGC (+1)	NGATSA_3002300	118 kDa	6	0.22	0.00037	15.56	15.41	15.64	15.52	15.74	15.69	15.79	15.84	0.0309	-0.1237	0.1134	-0.0089	0.2113	0.1559	0.2614	0.3082
825	2-oxoisovalerate dehydrogenase E1 component, alpha subunit OS=Nannochloropsis gaditana (strain CCMP526) GN=BKDA1 PE=4 SV=1	K8Z799_NANGC (+1)	BKDA1	54 kDa	5	0.32	0.00037	16.19	16.21	16.3	16.36	16.49	16.59	16.59	16.76	-0.0901	-0.0789	-0.0048	0.0859	0.2048	0.305	0.3232	0.4867
826	Ribosomal protein s25 OS=Nannochloropsis gaditana GN=Naga_100047g14 PE=4 SV=1	W7TVF9_9STRA	Naga_100047g14	12 kDa	29	-0.34	0.00037	16.2	16.79	16.78	16.7	15.91	16.36	16.31	16.41	-0.4301	0.1495	0.1426	0.0694	-0.7119	-0.2681	-0.3161	-0.2284
827	Uncharacterized protein OS=Nannochloropsis gaditana (strain CCMP526) GN=NGA_0139600 PE=4 SV=1	K8YQE0_NANGC	NGA_0139600	17 kDa	10	0.22	0.00037	17.18	17.13	17.16	17.09	17.41	17.3	17.47	17.27	0.0513	0.0039	0.0132	-0.0631	0.2764	0.1447	0.3261	0.1317
828	Uncharacterized protein OS=Nannochloropsis gaditana GN=Naga_100194g12 PE=4 SV=1	W7U319_9STRA	Naga_100194g12	53 kDa	13	0.29	0.00038	17.18	17	17.37	17.28	17.48	17.47	17.48	17.54	-0.031	-0.2226	0.1503	0.0653	0.2396	0.2544	0.2645	0.3252
829	Large subunit ribosomal protein L34e OS=Nannochloropsis gaditana (strain CCMP526) GN=RP-L34E PE=4 SV=1	K8YVG6_NANGC (+1)	RP-L34E	13 kDa	28	-0.22	0.00038	17.05	17.09	16.94	17.09	16.76	16.96	16.85	16.66	-0.0077	0.043	-0.1039	0.0604	-0.286	-0.0898	-0.1997	-0.4065
830	Serine palmitoyltransferase OS=Nannochloropsis gaditana (strain CCMP526) GN=NGA_0721800 PE=4 SV=1	K8YWG1_NANGC	NGA_0721800	58 kDa	11	0.28	0.00038	15.04	15.14	15.32	15.34	15.37	15.41	15.56	15.67	-0.1801	-0.0778	0.0906	0.1224	0.156	0.2047	0.3396	0.4537
831	Nucleoredoxin-like protein 2 OS=Nannochloropsis gaditana GN=Naga_100018g24 PE=4 SV=1	W7TIH9_9STRA	Naga_100018g24	18 kDa	5	0.38	0.00038	16.02	16.17	16.35	16.42	16.59	16.47	16.73	16.83	-0.2386	-0.0891	0.0946	0.1689	0.3338	0.211	0.5135	0.6157
832	Uncharacterized protein OS=Nannochloropsis gaditana GN=Naga_100319g3 PE=4 SV=1	W7TK94_9STRA	Naga_100319g3	54 kDa	10	-0.42	0.00038	15.69	15.73	15.88	15.7	15.23	15.19	15.36	15.48	-0.0665	-0.0192	0.1276	-0.0485	-0.5448	-0.5505	-0.401	-0.3288
833	Uncharacterized protein OS=Nannochloropsis gaditana GN=Naga_100065g7 PE=4 SV=1	W7TE32_9STRA	Naga_100065g7	21 kDa	8	-0.65	0.00039	16.73	15.99	16.24	16.35	16.08	15.51	15.3	15.6	0.4176	-0.3095	-0.0624	0.0652	-0.2204	-0.7923	-0.9819	-0.7361
834	N-acetyl-gamma-glutamyl-phosphate/N-acetyl-gamma-aminoadipyl-phosphate reductase OS=Nannochloropsis gaditana (strain CCMP526) GN=ARGC PE=3 SV=1	K8Z0J3_NANGC (+1)	ARGC	45 kDa	55	-0.12	0.0004	16.9	16.99	16.82	16.87	16.64	16.77	16.88	16.84	-0.001	0.0998	-0.0755	-0.0151	-0.2597	-0.1192	-0.0064	-0.0542
835	Fad-dependent pyridine nucleotide-disulfide oxidoreductase OS=Nannochloropsis gaditana (strain CCMP526) GN=NGA_0002702 PE=4 SV=1	K8YVU4_NANGC (+1)	NGA_0002702	43 kDa	17	0.26	0.00041	17.12	17.54	17.32	17.36	17.4	17.61	17.64	17.69	-0.2323	0.2006	-0.029	0.0313	0.0713	0.2652	0.2962	0.3403
836	DNA/RNA helicase, DEAD/DEAH box type OS=Nannochloropsis gaditana GN=Naga_100002g14 PE=4 SV=1	W7TZ82_9STRA	Naga_100002g14	151 kDa	10	0.17	0.00041	15.75	15.76	16.04	15.91	15.99	16.01	16.06	16.05	-0.1108	-0.1005	0.1799	0.0446	0.1315	0.1556	0.2024	0.1912
837	EGF-like region, conserved site OS=Nannochloropsis gaditana GN=Naga_100074g17 PE=4 SV=1	W7U4H2_9STRA	Naga_100074g17	35 kDa	6	0.28	0.00041	16.05	16.08	15.98	16.07	16.5	16.14	16.33	16.35	0.0047	0.0276	-0.065	0.0171	0.4576	0.09	0.2722	0.2943
838	Zz-type zinc finger-containing protein OS=Nannochloropsis gaditana GN=Naga_100044g19 PE=4 SV=1	W7U5J3_9STRA	Naga_100044g19	61 kDa	16	-0.13	0.00041	16.32	16.22	16.32	16.35	16.24	16.21	16.17	16.04	0.0137	-0.0815	0.0181	0.0503	-0.0631	-0.0993	-0.1339	-0.2659
839	CCR4-NOT transcription complex subunit 2 (Fragment) OS=Nannochloropsis gaditana (strain CCMP526) GN=NGATSA_3030900 PE=2 SV=1	I2CPI9_NANGC	NGATSA_3030900	34 kDa	3	0.27	0.00042	16.18	15.89	15.9	15.89	16.35	16.3	16.21	16.08	0.2136	-0.0888	-0.0669	-0.0765	0.386	0.3335	0.2386	0.1128
840	Uncharacterized protein OS=Nannochloropsis gaditana GN=Naga_104506g1 PE=4 SV=1	W7U1X6_9STRA	Naga_104506g1	8 kDa	4	0.56	0.00045	14.49	14.46	14.73	14.59	14.94	15.03	15.35	15.12	-0.0763	-0.1093	0.1621	0.0261	0.37	0.4707	0.7743	0.5553
841	Bacterioferritin comigratory protein OS=Nannochloropsis gaditana GN=Naga_100118g22 PE=4 SV=1	W7T749_9STRA	Naga_100118g22	31 kDa	29	0.29	0.00045	16.57	16.7	16.57	16.52	16.96	16.8	16.91	16.84	-0.0214	0.1202	-0.0212	-0.0621	0.3553	0.2113	0.3156	0.2386
842	Uncharacterized protein OS=Nannochloropsis gaditana GN=Naga_100012g24 PE=4 SV=1	W7TDH6_9STRA	Naga_100012g24	34 kDa	9	0.19	0.00046	15.78	15.67	15.72	15.7	15.96	15.86	15.87	15.93	0.0627	-0.0478	0.0089	-0.0186	0.2424	0.1335	0.1595	0.206
843	Glutaredoxin 2 OS=Nannochloropsis gaditana GN=Naga_100004g79 PE=4 SV=1	W7TQ45_9STRA	Naga_100004g79	31 kDa	16	0.19	0.00046	16.48	16.4	16.46	16.41	16.69	16.6	16.62	16.59	0.0365	-0.0419	0.031	-0.0099	0.2493	0.1626	0.1744	0.1584
844	Enhancer of rudimentary homolog OS=Nannochloropsis gaditana GN=Naga_100044g9 PE=3 SV=1	W7TPS2_9STRA	Naga_100044g9	12 kDa	8	0.2	0.00047	16.78	16.91	16.91	17.03	17.09	17.11	17.14	17.11	-0.1405	-0.0025	0.0021	0.1134	0.1812	0.2045	0.2285	0.1908
845	U1 small nuclear ribonucleoprotein a OS=Nannochloropsis gaditana GN=U2B PE=4 SV=1	W7TUI0_9STRA	U2B	28 kDa	3	0.45	0.00047	14.61	14.75	15.02	14.55	15.08	15.22	15.34	15.01	-0.1388	0.0081	0.2828	-0.1861	0.3372	0.4781	0.6019	0.2789
846	Sedoheptulose-bisphosphatase OS=Nannochloropsis gaditana (strain CCMP526) GN=NGA_0445900 PE=4 SV=1	K8YYP4_NANGC	NGA_0445900	35 kDa	11	0.2	0.00047	15.53	15.5	15.41	15.41	15.73	15.78	15.57	15.55	0.0586	0.0376	-0.0459	-0.048	0.2635	0.3254	0.1078	0.087
847	Disulfide isomerase OS=Nannochloropsis gaditana GN=Naga_100026g6 PE=4 SV=1	W7TT31_9STRA	Naga_100026g6	60 kDa	10	0.23	0.00048	15	15.22	15.24	15.18	15.39	15.4	15.45	15.31	-0.1665	0.0566	0.0745	0.0182	0.2286	0.2422	0.2825	0.1393
848	Queuosine biosynthesis protein OS=Nannochloropsis gaditana (strain CCMP526) GN=NGA_0719800 PE=4 SV=1	K8Z8U6_NANGC (+1)	NGA_0719800	18 kDa	4	-0.62	0.00048	13.95	13.82	14.08	14.03	13.53	13.6	13.32	13.21	-0.0089	-0.1458	0.1288	0.0638	-0.4882	-0.3842	-0.6501	-0.755
849	Cluster of Carboxypeptidase taq OS=Nannochloropsis gaditana GN=Naga_100859g1 PE=4 SV=1 (W7TQ85_9STRA)	W7TQ85_9STRA [2]	Naga_100859g1	68 kDa	7	-0.48	0.0005	15.83	15.88	15.75	15.68	15.22	15.32	15.34	15.32	0.061	0.112	-0.0186	-0.1241	-0.4885	-0.394	-0.3655	-0.3945
850	Ribosomal protein L37 OS=Nannochloropsis gaditana (strain CCMP526) GN=RP-L37E PE=3 SV=1	K8YX48_NANGC	RP-L37E	11 kDa	15	-0.22	0.0005	15.6	15.73	15.72	15.74	15.47	15.63	15.4	15.38	-0.0852	0.0218	0.0117	0.0425	-0.2392	-0.0742	-0.305	-0.3178
851	Uricase OS=Nannochloropsis gaditana GN=Naga_100026g15 PE=3 SV=1	W7TW56_9STRA	Naga_100026g15	34 kDa	21	-0.22	0.0005	16.78	16.77	16.63	16.63	16.45	16.57	16.46	16.45	0.077	0.0804	-0.0578	-0.0713	-0.2498	-0.1376	-0.2378	-0.2521
852	14 kDa subunit splicing factor 3b OS=Nannochloropsis gaditana GN=Naga_100037g13 PE=4 SV=1	W7TF67_9STRA	Naga_100037g13	15 kDa	5	0.3	0.00051	15.49	15.44	15.92	15.59	15.78	15.93	15.97	16.04	-0.1493	-0.177	0.2957	-0.0303	0.159	0.3131	0.347	0.4475
853	Eukaryotic translation initiation factor 6 OS=Nannochloropsis gaditana GN=EIF6 PE=3 SV=1	W7UBL7_9STRA	EIF6	35 kDa	7	0.26	0.00051	14.69	14.52	14.68	14.65	15.01	14.78	14.84	14.9	0.0487	-0.1106	0.0441	0.0213	0.3739	0.1361	0.1995	0.2648
854	Uncharacterized protein OS=Nannochloropsis gaditana GN=Naga_100558g1 PE=4 SV=1	W7TP95_9STRA	Naga_100558g1	51 kDa	6	-0.29	0.00051	16.26	16.31	16.38	16.41	15.92	16.17	16.03	16.07	-0.0778	-0.021	0.0395	0.0912	-0.4233	-0.177	-0.3187	-0.2703
855	Glyceraldehyde-3-phosphate dehydrogenase OS=Nannochloropsis gaditana GN=Naga_100257g1 PE=3 SV=1	W7U445_9STRA	Naga_100257g1	31 kDa	17	0.18	0.00052	15.68	16	15.88	15.84	15.97	15.92	16.13	16.14	-0.1669	0.1397	0.0212	-0.0105	0.1111	0.0601	0.2868	0.2847
856	Uncharacterized protein OS=Nannochloropsis gaditana GN=Naga_100039g31 PE=4 SV=1	W7T4Z9_9STRA	Naga_100039g31	31 kDa	27	0.3	0.00053	15.73	15.69	16.18	16.42	16.18	15.8	16.63	16.51	-0.284	-0.3264	0.1681	0.4077	0.1593	-0.2093	0.6195	0.4925
857	RuvB-like helicase OS=Nannochloropsis gaditana (strain CCMP526) GN=NGATSA_3023700 PE=2 SV=1	I2CP67_NANGC	NGATSA_3023700	50 kDa	15	0.13	0.00054	16.57	16.49	16.6	16.59	16.74	16.65	16.67	16.7	0.0113	-0.076	0.0418	0.0281	0.1834	0.0907	0.1108	0.1409
858	Acyl-synthetase family member mitochondrial OS=Nannochloropsis gaditana GN=Naga_100025g40 PE=4 SV=1	W7TJF8_9STRA	Naga_100025g40	31 kDa	12	0.2	0.00054	17.75	17.73	17.61	17.66	18.01	17.82	17.97	17.72	0.0614	0.0402	-0.0716	-0.0274	0.3192	0.1444	0.2876	0.0374
859	Uncharacterized protein OS=Nannochloropsis gaditana GN=Naga_100056g10 PE=4 SV=1	W7TJ32_9STRA	Naga_100056g10	47 kDa	14	-0.21	0.00055	16	15.57	15.89	15.66	15.47	15.56	15.64	15.53	0.2437	-0.1886	0.124	-0.1049	-0.2943	-0.2141	-0.1155	-0.2334
860	Phenylalanyl-trna synthetase beta chain OS=Nannochloropsis gaditana GN=Naga_100004g49 PE=4 SV=1	W7TXC3_9STRA	Naga_100004g49	69 kDa	9	-0.16	0.00055	17.25	17.28	17.44	17.45	17.12	17.16	17.36	17.14	-0.105	-0.0784	0.0865	0.0913	-0.2357	-0.204	0.0031	-0.2262
861	Puff-specific protein bx42 OS=Nannochloropsis gaditana GN=Naga_100036g26 PE=4 SV=1	W7U5N7_9STRA	Naga_100036g26	72 kDa	7	0.25	0.00055	16.43	16.51	16.62	16.5	16.71	16.79	16.71	16.86	-0.0948	-0.0063	0.1033	-0.0247	0.1867	0.2795	0.1825	0.3527
862	Superoxide dismutase OS=Nannochloropsis gaditana GN=Naga_100051g29 PE=3 SV=1	W7TM73_9STRA	Naga_100051g29	26 kDa	35	0.26	0.00056	16.88	16.58	16.6	16.47	17.01	16.85	16.82	16.81	0.2629	-0.0414	-0.0092	-0.147	0.4034	0.2287	0.2063	0.1967
863	Ankyrin repeat-containing protein OS=Nannochloropsis gaditana GN=Naga_100250g6 PE=4 SV=1	W7TPY8_9STRA	Naga_100250g6	37 kDa	4	0.21	0.00057	15.42	15.57	15.56	15.6	15.65	15.75	15.84	15.72	-0.1201	0.0288	0.0187	0.0599	0.1088	0.2059	0.3043	0.1811
864	Mitochondrial phosphate carrier 1 OS=Nannochloropsis gaditana GN=MPC PE=3 SV=1	W7TTD8_9STRA	MPC	112 kDa	6	0.44	0.00058	14.97	14.96	15.28	15.2	15.33	15.53	15.7	15.75	-0.2046	-0.1931	0.1386	0.0602	0.1544	0.407	0.5542	0.6012
865	60s ribosomal protein l3 OS=Nannochloropsis gaditana GN=Naga_100667g1 PE=4 SV=1	W7T3X6_9STRA	Naga_100667g1	21 kDa	32	-0.12	0.00059	16.6	16.59	16.59	16.61	16.29	16.59	16.6	16.34	0.0042	-0.0053	-0.0017	0.0135	-0.3231	-0.0055	-0.0016	-0.2545
866	Cluster of Methylmalonate-semialdehyde dehydrogenase OS=Nannochloropsis gaditana GN=Naga_100125g3 PE=4 SV=1 (W7TKN7_9STRA)	W7TKN7_9STRA [2]	Naga_100125g3	57 kDa	25	0.19	0.00059	15.92	15.96	15.87	15.92	16.19	16.1	16.04	16.1	-0.0113	0.0457	-0.043	0.0024	0.2647	0.174	0.1194	0.1861
867	Sh2 domain containing protein OS=Nannochloropsis gaditana GN=Naga_100023g54 PE=4 SV=1	W7T6K9_9STRA	Naga_100023g54	125 kDa	9	0.2	0.0006	15.9	15.98	16.04	16.08	16.11	16.19	16.25	16.26	-0.1031	-0.0074	0.042	0.0895	0.1131	0.193	0.2616	0.2637
868	Pentatricopeptide repeat containing protein OS=Nannochloropsis gaditana GN=Naga_100176g8 PE=4 SV=1	W7TFI3_9STRA	Naga_100176g8	15 kDa	6	0.41	0.0006	16.31	16.31	16.42	16.5	16.82	16.41	16.84	17.02	-0.084	-0.0793	0.03	0.1108	0.4389	0.0241	0.4685	0.6301
869	Cluster of Glycosyl hydrolase OS=Nannochloropsis gaditana GN=Naga_100037g22 PE=4 SV=1 (W7TQ77_9STRA)	W7TQ77_9STRA [2]	Naga_100037g22	105 kDa	20	0.14	0.00061	16.13	16.19	16.14	16.11	16.28	16.2	16.36	16.26	-0.0084	0.0512	-0.0119	-0.0363	0.1479	0.0531	0.2272	0.1021
870	RNA helicase, DEAD-box type OS=Nannochloropsis gaditana GN=Naga_100014g28 PE=3 SV=1	W7U0G2_9STRA	Naga_100014g28	82 kDa	6	0.23	0.00061	15.6	15.59	15.83	15.89	15.89	15.85	16.12	15.98	-0.1333	-0.1451	0.0976	0.1564	0.1542	0.1208	0.383	0.2383
871	E3 ubiquitin-protein ligase upl6 OS=Nannochloropsis gaditana GN=Naga_100006g78 PE=4 SV=1	W7TQY7_9STRA	Naga_100006g78	143 kDa	6	0.28	0.00061	15.97	16.17	16.18	16.22	16.41	16.41	16.4	16.5	-0.167	0.027	0.0408	0.0983	0.3003	0.274	0.2804	0.3902
872	Dead deah box rna OS=Nannochloropsis gaditana (strain CCMP526) GN=NGA_0355400 PE=4 SV=1	K8YSG2_NANGC (+1)	NGA_0355400	79 kDa	6	0.42	0.00061	14.78	14.85	15.01	14.92	15.16	15.17	15.34	15.51	-0.1006	-0.0429	0.1199	0.0389	0.2768	0.2855	0.4556	0.6248
873	Uncharacterized protein OS=Nannochloropsis gaditana GN=Naga_100393g5 PE=4 SV=1	W7TUX3_9STRA	Naga_100393g5	37 kDa	27	-0.11	0.00063	16.26	16.19	16.26	16.15	16.19	16.06	16.18	16	0.0546	-0.0211	0.0372	-0.0672	-0.0347	-0.1673	-0.0382	-0.2155
874	Uncharacterized protein (Fragment) OS=Nannochloropsis gaditana GN=Naga_100959g1 PE=4 SV=1	W7TNR3_9STRA	Naga_100959g1	21 kDa	3	0.22	0.00063	15.94	15.86	16.02	15.83	16.17	16.16	16.08	16.1	0.0258	-0.0516	0.1083	-0.0814	0.2588	0.2427	0.173	0.1879
875	Uncharacterized protein OS=Nannochloropsis gaditana GN=Naga_100056g3 PE=4 SV=1	W7U2Y5_9STRA	Naga_100056g3	40 kDa	9	-0.25	0.00063	17.39	17.13	17.19	17.4	17.24	16.96	16.93	16.95	0.1229	-0.1442	-0.0805	0.1325	-0.0276	-0.3125	-0.3498	-0.3226
876	Peptidyl-prolyl cis-trans isomerase OS=Nannochloropsis gaditana GN=Naga_100571g1 PE=3 SV=1	W7TGK2_9STRA	Naga_100571g1	32 kDa	28	0.15	0.00064	16.99	16.95	16.91	16.79	17.04	17.1	17.11	16.95	0.075	0.0445	0.003	-0.1155	0.1274	0.1931	0.1965	0.0482
877	Biotin lipoate protein ligase-like protein OS=Nannochloropsis gaditana GN=Naga_100055g16 PE=4 SV=1	W7TWD4_9STRA	Naga_100055g16	38 kDa	3	0.44	0.00065	15.86	15.73	15.71	15.63	16.25	16.15	16.09	16.2	0.1281	0.0056	-0.0231	-0.0975	0.5317	0.4227	0.355	0.4667
878	Uncharacterized protein OS=Nannochloropsis gaditana GN=Naga_100005g17 PE=4 SV=1	W7TPC1_9STRA	Naga_100005g17	56 kDa	3	0.32	0.00067	13.97	14.11	14.3	14.01	14.34	14.44	14.45	14.47	-0.1416	0.0033	0.1967	-0.0939	0.2301	0.3384	0.3469	0.3683
879	Uncharacterized protein OS=Nannochloropsis gaditana GN=Naga_100112g16 PE=4 SV=1	W7TR25_9STRA	Naga_100112g16	60 kDa	4	0.58	0.00069	14.94	15.09	15.55	15.47	15.77	15.72	15.91	15.92	-0.3611	-0.1882	0.2605	0.1975	0.4977	0.5201	0.6296	0.6684
880	Cop9 signalosome complex subunit 3 OS=Nannochloropsis gaditana GN=Naga_100004g26 PE=4 SV=1	W7TM21_9STRA	Naga_100004g26	63 kDa	9	0.23	0.0007	14.89	15.05	15.09	15	15.25	15.19	15.26	15.26	-0.1146	0.0373	0.0838	-0.0133	0.2566	0.1912	0.2546	0.2569
881	Inosine-uridine preferring nucleoside hydrolase OS=Nannochloropsis gaditana GN=Naga_100004g71 PE=4 SV=1	W7U6B4_9STRA	Naga_100004g71	41 kDa	3	0.32	0.0007	15.56	15.57	15.86	15.72	16.16	15.98	16.01	15.88	-0.1329	-0.1167	0.1673	0.0359	0.4957	0.2981	0.3276	0.2046
882	Uncharacterized protein (Fragment) OS=Nannochloropsis gaditana (strain CCMP526) GN=NGA_0357402 PE=4 SV=1	K8YVS2_NANGC (+1)	NGA_0357402	47 kDa	4	0.41	0.00071	14.88	14.78	14.91	14.93	15.26	15	15.49	15.28	0.0056	-0.1033	0.0233	0.053	0.3869	0.1267	0.6192	0.4066
883	Aldo-keto reductase OS=Nannochloropsis gaditana GN=Naga_100011g89 PE=4 SV=1	W7TP67_9STRA	Naga_100011g89	39 kDa	23	0.22	0.00072	15.64	15.73	15.55	15.58	15.86	15.84	15.89	15.78	0.0169	0.0959	-0.0849	-0.062	0.242	0.2149	0.2574	0.1341
884	Phosphatidylinositol kinase OS=Nannochloropsis gaditana GN=Naga_100001g222 PE=3 SV=1	W7TL20_9STRA	Naga_100001g222	114 kDa	29	0.15	0.00072	15.43	15.37	15.5	15.45	15.68	15.53	15.63	15.52	0.0167	-0.0644	0.0543	0.0078	0.2412	0.0907	0.1941	0.077
885	ATP synthase subunit beta, chloroplastic OS=Nannochloropsis gaditana GN=atpB PE=3 SV=1	K9ZXF4_9STRA	atpB	53 kDa	247	-0.16	0.00072	15.4	15.45	15.53	15.55	15.22	15.42	15.26	15.38	-0.1134	-0.0445	0.0321	0.0542	-0.2837	-0.0866	-0.2393	-0.1167
886	R-snare vamp72-family OS=Nannochloropsis gaditana GN=SNR6 PE=3 SV=1	W7U318_9STRA	SNR6	26 kDa	2	0.54	0.00073	12.38	12.38	12.51	12.6	13.05	12.88	13.15	13	-0.0775	-0.0874	0.0456	0.1308	0.6871	0.42	0.6822	0.5354
887	Methyltransferase type 11 OS=Nannochloropsis gaditana GN=Naga_100011g41 PE=4 SV=1	W7T617_9STRA	Naga_100011g41	46 kDa	29	-0.09	0.00075	16.36	16.1	16.21	16.1	16.14	16.11	16.08	16.03	0.1721	-0.0832	0.0231	-0.0834	-0.0547	-0.0929	-0.1023	-0.1545
888	Cathepsin D OS=Nannochloropsis gaditana (strain CCMP526) GN=CTSD PE=3 SV=1	K8YUV3_NANGC (+1)	CTSD	46 kDa	7	0.47	0.00076	15.86	15.74	15.84	15.62	16.22	16.11	16.27	16.3	0.0823	-0.003	0.1127	-0.1335	0.4753	0.3682	0.5126	0.5478
889	Ef-hand domain-containing protein OS=Nannochloropsis gaditana GN=mcfO PE=3 SV=1	W7TZV3_9STRA	mcfO	95 kDa	13	0.15	0.00078	15.44	15.48	15.5	15.48	15.57	15.59	15.64	15.7	-0.0408	0.002	0.0213	0.0053	0.0935	0.123	0.1707	0.2279
890	Epimerase 4-reductase OS=Nannochloropsis gaditana GN=Naga_100199g4 PE=4 SV=1	W7TNY2_9STRA	Naga_100199g4	35 kDa	30	-0.16	0.00078	16.25	16.03	16.02	16.09	16.03	16.02	15.91	15.83	0.155	-0.0666	-0.0676	0.0055	-0.08	-0.0681	-0.2018	-0.2795
891	Mitochondrial phosphate transporter OS=Nannochloropsis gaditana GN=Naga_100010g85 PE=3 SV=1	W7TMD6_9STRA	Naga_100010g85	38 kDa	31	0.21	0.00078	16.61	16.51	16.41	16.46	16.77	16.82	16.81	16.36	0.1251	0.0237	-0.0719	-0.0322	0.2856	0.3233	0.3201	-0.1347
892	Uncharacterized protein OS=Nannochloropsis gaditana GN=Naga_100075g19 PE=4 SV=1	W7T2Q8_9STRA	Naga_100075g19	19 kDa	3	0.26	0.00079	17.24	17.03	17.13	17.06	17.38	17.34	17.5	17.27	0.1217	-0.0825	0.017	-0.0634	0.2698	0.227	0.3825	0.1495
893	Six-hairpin glycosidase OS=Nannochloropsis gaditana GN=Naga_102633g1 PE=3 SV=1	W7TI89_9STRA	Naga_102633g1	8 kDa	4	0.4	0.0008	15.45	15.49	15.59	15.66	16.02	15.73	15.93	16.06	-0.0999	-0.057	0.039	0.1092	0.462	0.192	0.3718	0.5064
894	Tautomerase OS=Nannochloropsis gaditana GN=Naga_100053g19 PE=4 SV=1	W7TSH6_9STRA	Naga_100053g19	13 kDa	24	0.16	0.00082	16.76	16.74	16.54	16.65	16.95	16.86	16.81	16.69	0.1052	0.0576	-0.1325	-0.0159	0.2897	0.1944	0.1445	0.0245
895	Casein kinase I HRR25-like protein OS=Nannochloropsis gaditana (strain CCMP526) GN=HRR25 PE=3 SV=1	K8YP12_NANGC (+1)	HRR25	55 kDa	3	0.42	0.00083	15.3	15.47	15.67	15.77	15.9	15.87	16.07	16.11	-0.2611	-0.106	0.1028	0.2042	0.331	0.3542	0.4945	0.5448
896	Alanine--tRNA ligase OS=Nannochloropsis gaditana GN=ALARS PE=3 SV=1	W7T5P6_9STRA	ALARS	86 kDa	13	-0.23	0.00084	15.63	15.83	15.76	15.74	15.4	15.51	15.64	15.49	-0.112	0.0861	0.01	-0.0048	-0.3519	-0.2274	-0.1168	-0.2561
897	Uncharacterized protein OS=Nannochloropsis gaditana (strain CCMP526) GN=NGA_0266502 PE=4 SV=1	K8Z972_NANGC (+1)	NGA_0266502	10 kDa	8	0.3	0.00084	14.87	14.58	14.76	14.95	15.26	14.83	15.2	15.1	0.0664	-0.2339	-0.0362	0.1554	0.4706	0.0334	0.4058	0.3113
898	KRR1 small subunit processome component OS=Nannochloropsis gaditana GN=Naga_100047g9 PE=3 SV=1	W7TDG0_9STRA	Naga_100047g9	42 kDa	3	0.2	0.00087	16.15	16.16	16.31	16.35	16.45	16.5	16.49	16.34	-0.1069	-0.0887	0.0622	0.1034	0.2046	0.251	0.238	0.0899
899	Uncharacterized protein OS=Nannochloropsis gaditana (strain CCMP526) GN=NGA_0713600 PE=4 SV=1	K8ZBX9_NANGC (+1)	NGA_0713600	30 kDa	10	0.48	0.00087	14.28	14.45	14.83	14.98	14.99	14.88	15.45	15.76	-0.4246	-0.2313	0.1328	0.2753	0.2828	0.1797	0.7376	1.0237
900	ATP-dependent (S)-NAD(P)H-hydrate dehydratase OS=Nannochloropsis gaditana GN=Naga_100045g11 PE=3 SV=1	W7U0Q1_9STRA	Naga_100045g11	55 kDa	2	0.44	0.00087	16.83	16.7	16.49	16.75	17.12	16.92	17.56	17.18	0.1307	0.0008	-0.2085	0.0546	0.4184	0.2181	0.8528	0.4826
901	Cluster of Lactoylglutathione lyase (Fragment) OS=Nannochloropsis gaditana (strain CCMP526) GN=NGATSA_3005600 PE=2 SV=1 (I2CP56_NANGC)	I2CP56_NANGC [2]	NGATSA_3005600	46 kDa	9	-0.55	0.00089	19.03	18.7	18.6	18.55	18.61	18.27	17.9	17.78	0.3782	0.0039	-0.0916	-0.1335	-0.0759	-0.468	-0.768	-0.8995
902	Glycosyl bnr protein (Fragment) OS=Nannochloropsis gaditana (strain CCMP526) GN=NGA_0713800 PE=4 SV=1	K8Z9S5_NANGC	NGA_0713800	15 kDa	12	0.37	0.0009	13.85	14.63	14.26	14.27	14.43	14.37	14.85	15.03	-0.4188	0.3733	0.0072	0.0095	0.1671	0.0969	0.5809	0.758
903	Uncharacterized protein OS=Nannochloropsis gaditana GN=Naga_100046g26 PE=4 SV=1	W7TJ79_9STRA (+1)	Naga_100046g26	21 kDa	5	0.37	0.0009	14.49	14.56	14.48	14.37	15.13	15.07	14.85	14.5	0.013	0.0927	-0.0015	-0.1055	0.706	0.6064	0.3958	0.0333
904	Nascent polypeptide-associated complex subunit beta OS=Nannochloropsis gaditana GN=Naga_100017g54 PE=3 SV=1	W7UA11_9STRA	Naga_100017g54	18 kDa	11	0.24	0.00091	15.85	16.07	16.29	16.01	16.3	16.16	16.47	16.28	-0.2156	0.0095	0.2372	-0.0536	0.216	0.0947	0.4118	0.2225
905	Uncharacterized protein OS=Nannochloropsis gaditana GN=Naga_100013g51 PE=4 SV=1	W7U430_9STRA	Naga_100013g51	179 kDa	8	0.25	0.00092	16.6	16.73	16.95	16.75	16.85	17.26	16.97	16.97	-0.1839	-0.0101	0.1912	-0.0103	0.0939	0.5081	0.2041	0.2353
906	Swi snf matrix actin dependent regulator of subfamily member 1 OS=Nannochloropsis gaditana GN=Naga_100009g20 PE=4 SV=1	W7TYI9_9STRA	Naga_100009g20	263 kDa	6	0.28	0.00092	16.59	16.49	16.59	16.53	16.88	16.75	16.93	16.8	0.0593	-0.0527	0.037	-0.0146	0.3481	0.2001	0.3802	0.247
907	Pyrroline-5-carboxylate reductase OS=Nannochloropsis gaditana GN=Naga_100026g57 PE=3 SV=1	W7UBQ1_9STRA	Naga_100026g57	38 kDa	8	0.25	0.00092	16.24	16.38	16.41	16.37	16.5	16.58	16.61	16.68	-0.1431	0.0507	0.0388	0.0195	0.1395	0.2309	0.2555	0.3524
908	Putative thiol-disulfide oxidoreductase DCC OS=Nannochloropsis gaditana GN=Naga_100099g6 PE=4 SV=1	W7U3P0_9STRA	Naga_100099g6	26 kDa	14	0.16	0.00094	16.2	16.11	16.06	16.09	16.32	16.25	16.26	16.22	0.0914	-0.0064	-0.0481	-0.027	0.2224	0.1401	0.1329	0.112
909	Fact complex subunit ssrp1 OS=Nannochloropsis gaditana GN=Naga_100043g46 PE=4 SV=1	W7TS58_9STRA	Naga_100043g46	74 kDa	6	0.33	0.00096	16.43	16.34	16.76	16.45	16.91	16.61	17.03	16.81	-0.0666	-0.1837	0.2496	-0.0505	0.3991	0.1185	0.526	0.2955
910	Uncharacterized protein OS=Nannochloropsis gaditana GN=Naga_100583g3 PE=4 SV=1	W7TPR8_9STRA	Naga_100583g3	36 kDa	9	-0.16	0.00097	16.86	16.6	16.65	16.64	16.56	16.5	16.47	16.55	0.1786	-0.0891	-0.0299	-0.0467	-0.1241	-0.1808	-0.2106	-0.1336
911	Fad-linked oxidoreductase OS=Nannochloropsis gaditana GN=Naga_100031g37 PE=4 SV=1	W7TJS7_9STRA	Naga_100031g37	67 kDa	10	0.3	0.00098	15.46	16.14	15.82	15.88	15.94	15.93	16.3	16.51	-0.4056	0.2949	-0.0242	0.0315	0.102	0.1023	0.4659	0.6764
912	Uncharacterized protein OS=Nannochloropsis gaditana GN=Naga_100016g78 PE=4 SV=1	W7TNL1_9STRA	Naga_100016g78	40 kDa	8	0.25	0.00098	14.64	14.79	15.02	14.94	15.19	15.04	15.02	15.22	-0.2259	-0.0659	0.1496	0.0758	0.3352	0.1706	0.1489	0.3709
913	Transcription factor e2f7 OS=Nannochloropsis gaditana GN=Naga_100071g1 PE=3 SV=1	W7TPJ9_9STRA	Naga_100071g1	45 kDa	4	0.27	0.00099	13.81	14.19	14.17	14.19	14.31	14.41	14.29	14.51	-0.2757	0.1001	0.0683	0.085	0.2072	0.3198	0.19	0.417
914	Ribosomal protein L18e/L15P OS=Nannochloropsis gaditana GN=Naga_100015g48 PE=4 SV=1	W7U4G7_9STRA	Naga_100015g48	21 kDa	57	-0.14	0.00099	16.85	16.84	16.83	16.88	16.62	16.79	16.77	16.64	-0.0116	-0.0124	-0.0235	0.0377	-0.2388	-0.0641	-0.0883	-0.2275
915	Propionyl-alpha subunit OS=Nannochloropsis gaditana GN=Naga_100079g2 PE=4 SV=1	W7TIZ8_9STRA	Naga_100079g2	86 kDa	42	0.1	0.00099	16.4	16.3	16.44	16.31	16.47	16.4	16.53	16.47	0.0404	-0.0658	0.0742	-0.0507	0.1018	0.0286	0.16	0.1024
916	Cytochrome f OS=Nannochloropsis gaditana GN=petA PE=3 SV=1	K9ZV90_9STRA	petA	35 kDa	95	-0.13	0.001	16.29	16.24	16.21	16.34	16.22	16.06	16.12	16.15	-0.0066	-0.0173	-0.0644	0.075	-0.0525	-0.2007	-0.1475	-0.1182
917	Uncharacterized protein OS=Nannochloropsis gaditana (strain CCMP526) GN=NGATSA_3003200 PE=2 SV=1	I2CQQ0_NANGC	NGATSA_3003200	37 kDa	76	-0.11	0.001	16.36	16.55	16.34	16.37	16.36	16.24	16.22	16.36	-0.0524	0.138	-0.0658	-0.0272	-0.0409	-0.1702	-0.1923	-0.042
918	Cad protein OS=Nannochloropsis gaditana GN=Naga_100042g26 PE=3 SV=1	W7U0U1_9STRA	Naga_100042g26	170 kDa	48	0.1	0.001	16.46	16.46	16.6	16.56	16.56	16.61	16.68	16.6	-0.0804	-0.066	0.0712	0.0367	0.0268	0.0864	0.1672	0.0893
919	Coatomer subunit beta OS=Nannochloropsis gaditana GN=Naga_100032g30 PE=4 SV=1	W7TY00_9STRA	Naga_100032g30	119 kDa	46	-0.07	0.001	15.67	15.68	15.65	15.58	15.65	15.63	15.59	15.45	0.0384	0.0368	0.0052	-0.0616	0.0001	-0.024	-0.0568	-0.1887
920	Phytoene desaturase OS=Nannochloropsis gaditana GN=PDS PE=4 SV=1	W7TCB4_9STRA	PDS	66 kDa	39	-0.16	0.001	16.17	16.18	16.23	16.19	16	16.08	15.93	16.09	-0.0265	-0.0135	0.0404	-0.0035	-0.1878	-0.1132	-0.2601	-0.0963
921	Uncharacterized protein OS=Nannochloropsis gaditana GN=Naga_100198g12 PE=4 SV=1	W7TJ56_9STRA	Naga_100198g12	129 kDa	36	0.29	0.001	15.79	16.04	16.08	16.51	16.47	16.02	16.59	16.69	-0.2956	-0.0555	-0.0195	0.4062	0.3705	-0.0953	0.5086	0.5702
922	Phosphoadenosine phosphosulfate reductase OS=Nannochloropsis gaditana GN=Naga_100021g68 PE=4 SV=1	W7TI88_9STRA	Naga_100021g68	34 kDa	38	-0.09	0.001	16.61	16.52	16.35	16.36	16.42	16.38	16.3	16.32	0.1829	0.073	-0.0885	-0.0835	-0.0343	-0.0685	-0.1627	-0.1324
923	Ribosomal protein l12 OS=Nannochloropsis gaditana GN=Naga_100014g51 PE=3 SV=1	W7U0I2_9STRA	Naga_100014g51	18 kDa	36	-0.16	0.001	16.57	16.58	16.49	16.52	16.45	16.38	16.38	16.32	0.0427	0.0402	-0.0513	-0.0216	-0.0823	-0.1568	-0.164	-0.2313
924	T-complex protein 1 subunit zeta isoform a OS=Nannochloropsis gaditana GN=Naga_100061g30 PE=3 SV=1	W7TJM7_9STRA	Naga_100061g30	90 kDa	35	0.1	0.001	16.24	16.19	16.28	16.27	16.3	16.32	16.4	16.39	0.0017	-0.055	0.034	0.0213	0.0555	0.0768	0.1541	0.1482
925	Glycoside hydrolase family 8 OS=Nannochloropsis gaditana (strain CCMP526) GN=NGATSA_3002900 PE=2 SV=1	I2CQP6_NANGC (+1)	NGATSA_3002900	51 kDa	32	0.34	0.001	16.42	16.33	16.4	16.5	16.82	16.35	16.88	16.95	0	-0.0861	-0.0211	0.0875	0.387	-0.0693	0.4546	0.532
926	Coatomer subunit beta OS=Nannochloropsis gaditana (strain CCMP526) GN=NGA_0357120 PE=4 SV=1	K8Z7S3_NANGC	NGA_0357120	107 kDa	32	0.11	0.001	15.72	15.67	15.72	15.78	15.85	15.78	15.9	15.77	-0.0085	-0.0553	0.0033	0.0582	0.1345	0.0828	0.1921	0.0492
927	Poly-binding protein 3 OS=Nannochloropsis gaditana GN=Naga_100137g3 PE=4 SV=1	W7TTG5_9STRA	Naga_100137g3	54 kDa	30	0.22	0.001	15.29	15.24	15.27	15.21	15.69	15.47	15.42	15.32	0.046	-0.0153	0.0061	-0.0521	0.4247	0.2194	0.1699	0.0518
928	Calnexin OS=Nannochloropsis gaditana (strain CCMP526) GN=NGATSA_3007000 PE=2 SV=1	I2CQT1_NANGC	NGATSA_3007000	59 kDa	31	-0.14	0.001	17.06	16.66	16.65	16.74	16.84	16.61	16.54	16.5	0.2979	-0.113	-0.1185	-0.0288	0.0811	-0.1644	-0.2356	-0.276
929	Methylmalonyl-CoA mutase mitochondrial OS=Nannochloropsis gaditana GN=Naga_100001g107 PE=4 SV=1	W7U1M1_9STRA	Naga_100001g107	85 kDa	28	0.12	0.001	15.84	15.92	15.91	15.82	15.94	15.94	16.02	16.07	-0.0238	0.039	0.0318	-0.0502	0.0734	0.0665	0.1414	0.1993
930	RNA helicase,ATP-dependent, DEAD-box type OS=Nannochloropsis gaditana GN=Naga_100228g7 PE=3 SV=1	W7T0L9_9STRA	Naga_100228g7	47 kDa	28	0.15	0.001	15.68	15.64	15.74	15.67	15.86	15.79	15.9	15.77	-0.015	-0.0406	0.0576	-0.009	0.1861	0.1135	0.2147	0.0876
931	Trimeric LpxA OS=Nannochloropsis gaditana GN=Naga_100199g6 PE=4 SV=1	W7TZB8_9STRA	Naga_100199g6	29 kDa	29	-0.09	0.001	16.43	16.43	16.44	16.43	16.24	16.35	16.38	16.38	-0.0007	-0.0059	0.0071	-0.0018	-0.1881	-0.082	-0.0499	-0.0483
932	Ethylmalonic encephalopathy 1 OS=Nannochloropsis gaditana (strain CCMP526) GN=NGATSA_3024600 PE=2 SV=1	I2CRD5_NANGC	NGATSA_3024600	44 kDa	28	0.19	0.001	15.75	16.03	15.69	15.83	15.87	16.11	16.03	16.08	-0.0897	0.1964	-0.1364	-0.0111	0.0363	0.272	0.1959	0.2323
933	Seryl-tRNA synthetase OS=Nannochloropsis gaditana (strain CCMP526) GN=SARS PE=3 SV=1	K8YR20_NANGC (+1)	SARS	59 kDa	28	-0.18	0.001	15.54	15.59	15.59	15.56	15.37	15.38	15.4	15.43	-0.0404	0.0191	0.0233	-0.0151	-0.2005	-0.1792	-0.1763	-0.1366
934	Peptidase M16 OS=Nannochloropsis gaditana GN=Naga_100079g9 PE=4 SV=1	W7U2D5_9STRA	Naga_100079g9	143 kDa	26	-0.19	0.001	15.45	15.52	15.51	15.66	15.37	15.38	15.3	15.33	-0.0885	-0.0245	-0.0325	0.125	-0.1704	-0.1626	-0.2477	-0.2043
935	Dihydrolipoamide acetyltransferase component of pyruvate dehydrogenase complex OS=Nannochloropsis gaditana (strain CCMP526) GN=DLAT PE=3 SV=1	K8Z7I8_NANGC (+1)	DLAT	46 kDa	26	0.18	0.001	16.98	16.86	16.88	16.87	17.22	17.04	17.05	16.98	0.0721	-0.0486	-0.0232	-0.0234	0.3319	0.1272	0.1508	0.0834
936	60s ribosomal protein l11 OS=Nannochloropsis gaditana GN=Naga_100017g18 PE=4 SV=1	W7U1W1_9STRA	Naga_100017g18	26 kDa	23	-0.14	0.001	17	16.97	16.96	16.96	16.73	16.86	16.89	16.82	0.0304	-0.0016	-0.0123	-0.0161	-0.2559	-0.1123	-0.077	-0.1477
937	Mg-protoporphyrin ix methyl transferase OS=Nannochloropsis gaditana GN=PPMT PE=4 SV=1	W7TX07_9STRA	PPMT	36 kDa	23	-0.17	0.001	16.36	16.12	16.35	16.21	16.13	16.09	16.11	15.98	0.1011	-0.1353	0.0989	-0.046	-0.1135	-0.1711	-0.1488	-0.2849
938	Uncharacterized protein OS=Nannochloropsis gaditana (strain CCMP526) GN=NGA_0429000 PE=4 SV=1	K8YUK2_NANGC	NGA_0429000	137 kDa	22	0.16	0.001	15.86	15.85	16.03	16.04	16.11	16.04	16.15	16.18	-0.0877	-0.0928	0.0792	0.087	0.1611	0.0845	0.1937	0.2255
939	Translation initiation factor if-2 OS=Nannochloropsis gaditana GN=PTIF2 PE=3 SV=1	W7T2T0_9STRA	PTIF2	74 kDa	20	-0.21	0.001	16.54	16.51	16.61	16.56	16.36	16.42	16.29	16.33	-0.0308	-0.0391	0.0546	0.0103	-0.2037	-0.1283	-0.257	-0.2198
940	Long-chain acyl-synthetase 7 OS=Nannochloropsis gaditana GN=Naga_100649g1 PE=4 SV=1	W7TAS6_9STRA	Naga_100649g1	76 kDa	19	0.11	0.001	16.61	16.61	16.76	16.72	16.73	16.9	16.84	16.7	-0.0686	-0.0618	0.0908	0.0397	0.0518	0.2209	0.154	0.0238
941	Cytochrome c1 heme protein OS=Nannochloropsis gaditana GN=Naga_100051g28 PE=4 SV=1	W7TM97_9STRA	Naga_100051g28	33 kDa	19	0.18	0.001	15.97	15.76	15.83	15.71	16.07	15.87	16.05	15.95	0.1641	-0.0523	0.0214	-0.1041	0.2562	0.0498	0.2388	0.1464
942	Poly + rna transport protein OS=Nannochloropsis gaditana GN=Naga_100218g10 PE=4 SV=1	W7TQK3_9STRA	Naga_100218g10	127 kDa	19	0.18	0.001	15.72	15.93	15.77	15.79	15.97	15.84	16.05	16.08	-0.099	0.1223	-0.0388	-0.0243	0.1632	0.0222	0.247	0.2786
943	Dj-1 family protein OS=Nannochloropsis gaditana (strain CCMP526) GN=NGA_0546600 PE=4 SV=1	K8Z3U6_NANGC	NGA_0546600	21 kDa	18	0.15	0.001	15.81	15.98	15.86	15.89	15.91	16.05	16.08	16.08	-0.0784	0.0967	-0.0316	0.0058	0.0237	0.1484	0.1928	0.1943
944	NADH dehydrogenase subunit 7 OS=Nannochloropsis gaditana GN=nd7 PE=3 SV=1	K9ZVC8_9STRA	nd7	45 kDa	18	0.16	0.001	15.69	15.97	15.94	16.01	15.85	16.06	16.17	16.16	-0.212	0.0592	0.0281	0.096	-0.0546	0.1625	0.2536	0.2556
945	Uncharacterized protein OS=Nannochloropsis gaditana (strain CCMP526) GN=NGATSA_3024000 PE=2 SV=1	I2CP15_NANGC	NGATSA_3024000	74 kDa	17	0.11	0.001	16.58	16.5	16.59	16.59	16.72	16.72	16.66	16.62	0.0163	-0.0621	0.0208	0.0193	0.1474	0.1501	0.0971	0.0495
946	Ubiquitin carboxyl-terminal hydrolase OS=Nannochloropsis gaditana (strain CCMP526) GN=NGATSA_3022800 PE=2 SV=1	I2CPD4_NANGC	NGATSA_3022800	40 kDa	17	0.12	0.001	16.54	16.51	16.54	16.52	16.64	16.62	16.7	16.64	0.0151	-0.0211	0.0097	-0.0068	0.1162	0.0865	0.1698	0.1072
947	Uncharacterized protein OS=Nannochloropsis gaditana (strain CCMP526) GN=NGA_0721600 PE=4 SV=1	K8Z8J0_NANGC (+1)	NGA_0721600	68 kDa	15	-0.17	0.001	15.74	15.63	15.65	15.69	15.4	15.5	15.59	15.53	0.0711	-0.0422	-0.0299	0.0168	-0.2597	-0.1782	-0.0768	-0.1458
948	Helicase-associated domain protein OS=Nannochloropsis gaditana GN=Naga_100033g25 PE=4 SV=1	W7TTP2_9STRA	Naga_100033g25	80 kDa	17	0.15	0.001	16.2	16.28	16.27	16.22	16.45	16.39	16.41	16.33	-0.0356	0.0295	0.0196	-0.0291	0.2035	0.1371	0.1609	0.0862
949	Uncharacterized protein (Fragment) OS=Nannochloropsis gaditana GN=Naga_101756g1 PE=4 SV=1	W7TGP2_9STRA	Naga_101756g1	37 kDa	16	0.63	0.001	15.53	17.01	17.31	17.29	15.72	17.46	18.26	18.68	-1.5895	-0.0907	0.2125	0.1869	-1.3192	0.3574	1.1479	1.5526
950	Ribosomal protein l23 OS=Nannochloropsis gaditana GN=Naga_100025g57 PE=3 SV=1	W7U0N0_9STRA	Naga_100025g57	21 kDa	16	-0.27	0.001	16.63	16.75	16.74	16.7	16.19	16.65	16.59	16.28	-0.085	0.0403	0.0309	-0.0156	-0.5145	-0.0662	-0.1252	-0.4358
951	PsbQ-like domain protein OS=Nannochloropsis gaditana GN=Naga_100069g2 PE=4 SV=1	W7TKJ6_9STRA	Naga_100069g2	27 kDa	14	0.24	0.001	17.34	16.99	17.15	16.99	17.48	17.33	17.31	17.32	0.2448	-0.1297	0.0532	-0.1159	0.3707	0.2249	0.1952	0.2137
952	Sec1 family domain containing 1 OS=Nannochloropsis gaditana GN=Naga_100020g34 PE=3 SV=1	W7TB19_9STRA	Naga_100020g34	74 kDa	13	0.23	0.001	14.6	14.55	14.65	14.6	14.8	15	14.75	14.8	-0.0001	-0.0398	0.0576	0.0016	0.2074	0.4057	0.1507	0.1944
953	Amine oxidase OS=Nannochloropsis gaditana GN=Naga_100097g5 PE=4 SV=1	W7U1W2_9STRA	Naga_100097g5	64 kDa	15	0.16	0.001	15.3	15.26	15.41	15.31	15.43	15.4	15.55	15.5	-0.0199	-0.0496	0.0903	-0.0118	0.1221	0.0716	0.231	0.1962
954	Uncharacterized protein OS=Nannochloropsis gaditana (strain CCMP526) GN=NGA_0231800 PE=4 SV=1	K8YTF8_NANGC	NGA_0231800	31 kDa	13	0.27	0.001	15.94	15.99	16.18	16.45	16.39	16.19	16.55	16.71	-0.2249	-0.1752	0.0279	0.2953	0.2455	0.0306	0.417	0.6481
955	Ribulose--bisphosphate carboxylase oxygenase small subunit n-methyltransferase i OS=Nannochloropsis gaditana GN=Naga_100644g2 PE=4 SV=1	W7TKS2_9STRA	Naga_100644g2	73 kDa	11	-0.16	0.001	16.56	16.49	16.46	16.43	16.44	16.3	16.23	16.27	0.1075	0.0133	-0.0305	-0.0503	-0.0341	-0.1846	-0.2547	-0.2129
956	Glutamate synthase (Fragment) OS=Nannochloropsis gaditana GN=Naga_101061g3 PE=4 SV=1	W7TTK1_9STRA	Naga_101061g3	13 kDa	12	0.39	0.001	16.22	16.18	16.28	16.31	16.79	16.43	16.78	16.61	-0.0422	-0.0619	0.0326	0.056	0.5269	0.197	0.487	0.3618
957	Uncharacterized protein OS=Nannochloropsis gaditana GN=Naga_100104g9 PE=4 SV=1	W7TKP8_9STRA	Naga_100104g9	29 kDa	12	0.93	0.001	15.79	15.77	15.71	15.99	17.03	16.31	16.65	16.97	-0.028	-0.0502	-0.1128	0.1625	1.1984	0.4808	0.8326	1.1329
958	Uncharacterized protein OS=Nannochloropsis gaditana GN=Naga_100618g2 PE=4 SV=1	W7TCJ3_9STRA	Naga_100618g2	52 kDa	11	0.56	0.001	15.7	15.46	15.79	16.03	16.49	16.05	16.2	16.78	-0.0333	-0.3057	0.0157	0.2686	0.7238	0.267	0.4488	1.0349
959	NAD(P)-binding domain protein OS=Nannochloropsis gaditana GN=Naga_100014g48 PE=4 SV=1	W7TGF5_9STRA	Naga_100014g48	47 kDa	11	0.24	0.001	16.13	16.1	15.99	16.08	16.41	16.33	16.37	16.14	0.0592	0.0235	-0.0918	-0.0017	0.3407	0.2544	0.2842	0.0677
960	Protein kinase, ATP binding site OS=Nannochloropsis gaditana GN=Naga_100014g34 PE=4 SV=1	W7TZP8_9STRA	Naga_100014g34	105 kDa	10	0.27	0.001	15.18	15.39	15.42	15.28	15.56	15.52	15.65	15.68	-0.1423	0.0621	0.0857	-0.054	0.2374	0.1949	0.3227	0.3224
961	Pre-mRNA-splicing factor SYF1 OS=Nannochloropsis gaditana (strain CCMP526) GN=SYF1 PE=4 SV=1	K8YQA2_NANGC (+1)	SYF1	113 kDa	11	0.18	0.001	15.53	15.53	15.62	15.55	15.61	15.73	15.9	15.75	-0.0285	-0.0297	0.0565	-0.0097	0.0651	0.1786	0.3243	0.1831
962	RuvB-like helicase OS=Nannochloropsis gaditana (strain CCMP526) GN=NGA_0496400 PE=3 SV=1	K8YU94_NANGC (+1)	NGA_0496400	54 kDa	10	0.21	0.001	14.51	14.69	14.72	14.55	14.75	15.01	14.77	14.83	-0.109	0.0737	0.0957	-0.0669	0.1398	0.3881	0.1502	0.2068
963	Proteasome subunit beta type (Fragment) OS=Nannochloropsis gaditana (strain CCMP526) GN=PSMB4 PE=3 SV=1	K8YV74_NANGC (+1)	PSMB4	27 kDa	10	0.15	0.001	16.35	16.27	16.1	16.15	16.44	16.42	16.36	16.23	0.1396	0.0522	-0.1091	-0.0627	0.221	0.207	0.1409	0.0263
964	Nuclear autoantigenic sperm protein (Fragment) OS=Nannochloropsis gaditana (strain CCMP526) GN=NGA_2030300 PE=4 SV=1	K8Z1X3_NANGC (+1)	NGA_2030300	40 kDa	10	0.19	0.001	15.08	15.15	15.2	15.03	15.37	15.34	15.17	15.36	-0.0321	0.0345	0.0909	-0.0931	0.2537	0.2238	0.0411	0.2386
965	Nadh dehydrogenase OS=Nannochloropsis gaditana GN=NUOF PE=4 SV=1	W7T6R7_9STRA	NUOF	14 kDa	9	0.25	0.001	16.45	16.67	16.62	16.54	16.79	16.82	16.76	16.92	-0.1447	0.0944	0.0421	-0.0445	0.2161	0.2307	0.1886	0.3397
966	Mitochondrial 2-oxoglutarate malate carrier protein OS=Nannochloropsis gaditana GN=Naga_100684g4 PE=3 SV=1	W7TLF9_9STRA	Naga_100684g4	34 kDa	10	0.27	0.001	15.75	15.78	15.89	15.78	16.01	16.09	16.03	16.16	-0.0591	-0.0254	0.0866	-0.0297	0.2254	0.2871	0.2244	0.3248
967	Uncharacterized protein OS=Nannochloropsis gaditana GN=Naga_100097g4 PE=4 SV=1	W7U1W6_9STRA	Naga_100097g4	25 kDa	10	0.44	0.001	14.8	14.67	14.25	14.41	15.21	15.21	14.88	14.58	0.2271	0.1174	-0.3045	-0.1512	0.6447	0.6592	0.3234	0.0321
968	Isochorismatase OS=Nannochloropsis gaditana GN=Naga_100131g6 PE=4 SV=1	W7U6T6_9STRA	Naga_100131g6	26 kDa	10	0.29	0.001	16.5	16.35	16.37	16.36	16.69	16.78	16.67	16.6	0.0838	-0.0405	-0.0208	-0.0278	0.2911	0.3663	0.272	0.2086
969	Uncharacterized protein (Fragment) OS=Nannochloropsis gaditana (strain CCMP526) GN=NGATSA_3022500 PE=2 SV=1	I2CRB6_NANGC (+1)	NGATSA_3022500	19 kDa	9	0.55	0.001	15.31	15.19	15.35	15.3	15.82	15.67	15.92	15.89	-0.0175	-0.1439	0.0505	-0.0029	0.5167	0.3901	0.6386	0.62
970	Phosphatidylinositol-bisphosphatase OS=Nannochloropsis gaditana (strain CCMP526) GN=NGATSA_2029300 PE=2 SV=1	I2CRE3_NANGC (+2)	NGATSA_2029300	88 kDa	9	0.19	0.001	15.71	15.81	15.85	15.88	15.92	16.03	15.99	16.08	-0.1228	-0.0106	0.0299	0.0575	0.1014	0.215	0.1608	0.2548
971	Abc subfamily abcg (Fragment) OS=Nannochloropsis gaditana (strain CCMP526) GN=NGA_0046102 PE=4 SV=1	K8YWN3_NANGC (+1)	NGA_0046102	83 kDa	9	0.15	0.001	15.13	15.23	15.32	15.3	15.39	15.45	15.44	15.33	-0.1141	-0.0239	0.0648	0.0462	0.1466	0.2071	0.1817	0.0718
972	Zip zinc transporter family protein OS=Nannochloropsis gaditana GN=Naga_100051g18 PE=4 SV=1	W7T5N3_9STRA	Naga_100051g18	46 kDa	9	-0.19	0.001	13.72	14.05	14.01	13.9	13.84	13.79	13.65	13.62	-0.1978	0.1287	0.0866	-0.0124	-0.0758	-0.1326	-0.2694	-0.303
973	Sit4 phosphatase-associated family protein OS=Nannochloropsis gaditana GN=Naga_100019g23 PE=4 SV=1	W7TD98_9STRA	Naga_100019g23	123 kDa	9	0.29	0.001	15.45	15.57	15.68	15.49	15.78	15.92	15.71	15.87	-0.0982	0.0434	0.1441	-0.0505	0.2521	0.3754	0.1642	0.3263
974	Ap-2 complex subunit mu OS=Nannochloropsis gaditana GN=APM2 PE=3 SV=1	W7TFH3_9STRA (+1)	APM2	52 kDa	9	0.23	0.001	14.84	15.26	15.29	15.3	15.14	15.43	15.46	15.57	-0.344	0.0791	0.1077	0.1176	-0.0451	0.2597	0.2819	0.3885
975	Pyridoxamine 5-phosphate oxidase, putative OS=Nannochloropsis gaditana GN=Naga_100044g35 PE=3 SV=1	W7U5H2_9STRA	Naga_100044g35	53 kDa	9	0.23	0.001	13.84	13.94	13.72	13.75	14.09	14.15	13.97	13.99	0.0277	0.111	-0.1088	-0.0851	0.2734	0.33	0.1495	0.1549
976	Lysosomal alpha-mannosidase (Fragment) OS=Nannochloropsis gaditana (strain CCMP526) GN=NGATSA_3021300 PE=2 SV=1	I2CPA4_NANGC	NGATSA_3021300	48 kDa	9	0.28	0.001	15.75	15.68	15.62	15.65	15.89	15.98	15.95	16	0.082	-0.0047	-0.0542	-0.0206	0.195	0.3281	0.28	0.3252
977	Uncharacterized protein (Fragment) OS=Nannochloropsis gaditana (strain CCMP526) GN=NGATSA_3013400 PE=2 SV=1	I2CR05_NANGC (+1)	NGATSA_3013400	31 kDa	8	-0.19	0.001	15.98	15.74	15.69	15.73	15.75	15.53	15.65	15.46	0.2027	-0.0434	-0.0938	-0.0519	-0.0269	-0.269	-0.1399	-0.3225
978	Very long-chain acyl-synthetase isoform 1 OS=Nannochloropsis gaditana GN=Naga_100120g10 PE=4 SV=1	W7TLW2_9STRA (+1)	Naga_100120g10	72 kDa	8	0.17	0.001	14.81	14.7	14.75	14.76	14.96	14.92	14.91	14.89	0.0597	-0.063	-0.0064	0.0001	0.2091	0.1609	0.1562	0.1347
979	Prefoldin OS=Nannochloropsis gaditana GN=Naga_100044g14 PE=4 SV=1	W7TPS6_9STRA	Naga_100044g14	78 kDa	7	0.39	0.001	17.5	17.42	17.49	17.36	17.95	17.64	17.8	17.94	0.0684	-0.025	0.068	-0.0848	0.5106	0.2023	0.3605	0.518
980	Lipid droplet surface protein OS=Nannochloropsis gaditana GN=Naga_100004g99 PE=4 SV=1	W7U6A7_9STRA	Naga_100004g99	32 kDa	8	0.44	0.001	16.64	16.92	17	16.89	17.28	17.35	17.45	17.19	-0.2626	0.0561	0.1249	0.0222	0.4138	0.4587	0.5433	0.3041
981	Fatty-acid-ligase fadd9 OS=Nannochloropsis gaditana GN=Naga_100035g43 PE=4 SV=1	W7UAH1_9STRA	Naga_100035g43	142 kDa	8	0.23	0.001	15.23	15.22	15.36	15.47	15.43	15.58	15.72	15.44	-0.1161	-0.1341	0.0347	0.1374	0.102	0.252	0.3962	0.1043
982	Fructosamine 3 kinase OS=Nannochloropsis gaditana (strain CCMP526) GN=NGA_0452600 PE=4 SV=1	K8Z9Y9_NANGC (+1)	NGA_0452600	47 kDa	7	-0.39	0.001	16.03	16.27	15.99	15.92	15.65	15.85	15.45	15.58	-0.0463	0.2231	-0.059	-0.1186	-0.4036	-0.1878	-0.6078	-0.4562
983	Mrna cap guanine-n7 methyltransferase 1-like protein OS=Nannochloropsis gaditana GN=Naga_100001g88 PE=4 SV=1	W7U1B3_9STRA	Naga_100001g88	153 kDa	7	0.31	0.001	16.44	16.57	16.59	16.6	16.8	16.73	16.96	16.94	-0.1183	0.0097	0.0298	0.043	0.2405	0.1593	0.4123	0.3798
984	Rna polymerase-associated protein ctr9 OS=Nannochloropsis gaditana GN=Naga_100194g15 PE=4 SV=1	W7TJ42_9STRA	Naga_100194g15	153 kDa	7	0.35	0.001	14.82	15.18	15.16	15.29	15.32	15.33	15.65	15.67	-0.3472	0.02	0.001	0.1518	0.1443	0.1806	0.5189	0.5868
985	Sideroflexin 2 OS=Nannochloropsis gaditana GN=Naga_100101g19 PE=4 SV=1	W7TKB2_9STRA	Naga_100101g19	22 kDa	7	0.28	0.001	16.49	16.48	16.59	16.51	16.75	16.67	16.98	16.8	-0.0405	-0.0432	0.0741	-0.005	0.2224	0.1556	0.4652	0.3017
986	Microtubule-associated protein rp eb family member 1 OS=Nannochloropsis gaditana GN=Naga_100010g74 PE=4 SV=1	W7TMC3_9STRA (+1)	Naga_100010g74	38 kDa	7	-0.38	0.001	15.77	15.62	15.67	15.69	15.44	15.25	15.24	15.3	0.0742	-0.0615	-0.015	0.0013	-0.2484	-0.4382	-0.4211	-0.3913
987	Uncharacterized protein OS=Nannochloropsis gaditana (strain CCMP526) GN=NGA_0482100 PE=4 SV=1	K8YVG7_NANGC	NGA_0482100	14 kDa	7	0.66	0.001	16.81	16.51	16.29	16.31	17.39	16.53	17.21	17.2	0.3255	0.0306	-0.1852	-0.1845	0.8971	0.0549	0.7138	0.7112
988	Peptidyl-prolyl cis-trans isomerase OS=Nannochloropsis gaditana GN=Naga_100273g4 PE=4 SV=1	W7TC41_9STRA	Naga_100273g4	37 kDa	6	0.36	0.001	16.23	16.29	16.6	16.54	16.89	16.65	16.67	16.95	-0.2038	-0.1523	0.1651	0.1037	0.4715	0.2589	0.2642	0.5083
989	Sec23/sec24 transport protein OS=Nannochloropsis gaditana GN=Naga_101213g1 PE=4 SV=1	W7T565_9STRA	Naga_101213g1	46 kDa	5	-0.3	0.001	16.98	16.92	16.96	17.1	16.71	16.93	16.68	16.48	-0.0153	-0.0666	-0.0299	0.1025	-0.2869	-0.0751	-0.316	-0.533
990	Uncharacterized protein OS=Nannochloropsis gaditana GN=Naga_101670g3 PE=4 SV=1	W7TAM4_9STRA	Naga_101670g3	23 kDa	6	0.43	0.001	15.62	15.46	15.6	15.52	15.93	16.04	15.94	15.97	0.0683	-0.0825	0.0576	-0.0298	0.3544	0.4733	0.3984	0.4219
991	Uncharacterized protein OS=Nannochloropsis gaditana GN=Naga_100060g9 PE=4 SV=1	W7TF16_9STRA	Naga_100060g9	39 kDa	6	0.3	0.001	14.39	14.21	14.29	14.2	14.63	14.44	14.68	14.59	0.1082	-0.0616	0.0218	-0.0683	0.3658	0.1815	0.4411	0.3208
992	Uncharacterized protein OS=Nannochloropsis gaditana GN=Naga_100057g14 PE=4 SV=1	W7TSM1_9STRA	Naga_100057g14	25 kDa	6	0.29	0.001	15.25	14.94	14.9	14.79	15.59	15.21	15.22	15.01	0.2821	-0.0275	-0.08	-0.1837	0.6164	0.2296	0.2427	0.0369
993	Trafficking protein particle complex subunit 3 OS=Nannochloropsis gaditana GN=Naga_100104g12 PE=4 SV=1	W7TW04_9STRA	Naga_100104g12	21 kDa	5	0.25	0.001	16.24	16.24	16.16	16.29	16.43	16.48	16.51	16.51	0.0111	0.0002	-0.0789	0.0588	0.2013	0.2528	0.2797	0.2752
994	Dehydroascorbate reductase OS=Nannochloropsis gaditana GN=Naga_100024g18 PE=4 SV=1	W7U001_9STRA	Naga_100024g18	35 kDa	6	-0.15	0.001	16.82	16.76	16.58	16.61	16.65	16.43	16.55	16.5	0.1281	0.078	-0.1087	-0.0755	-0.0381	-0.2509	-0.1387	-0.1847
995	Lipase, class 3 OS=Nannochloropsis gaditana GN=Naga_100091g1 PE=4 SV=1	W7U4G1_9STRA	Naga_100091g1	68 kDa	6	0.18	0.001	15.46	15.52	15.45	15.43	15.67	15.63	15.58	15.71	-0.0051	0.0585	-0.0207	-0.0429	0.2129	0.1604	0.1037	0.2417
996	ATP synthase subunit a, chloroplastic OS=Nannochloropsis gaditana GN=atpI PE=3 SV=1	K9ZXH9_9STRA	atpI	28 kDa	6	-0.41	0.001	12.91	12.5	12.29	12.65	12.29	12.04	12.29	12.13	0.3122	-0.1066	-0.3158	0.0488	-0.314	-0.5594	-0.3423	-0.4562
997	Uncharacterized protein (Fragment) OS=Nannochloropsis gaditana GN=Naga_101019g2 PE=4 SV=1	W7TJR8_9STRA	Naga_101019g2	41 kDa	6	0.17	0.001	16.21	16.24	16.3	16.27	16.51	16.4	16.39	16.42	-0.0376	-0.0119	0.0416	0.0161	0.2602	0.1401	0.1389	0.1634
998	Beta-adaptin-like protein a OS=Nannochloropsis gaditana GN=CPC20 PE=4 SV=1	W7TUD1_9STRA	CPC20	95 kDa	6	0.26	0.001	15.5	15.52	15.71	15.66	15.66	15.77	16.01	16.03	-0.1079	-0.083	0.1054	0.0593	0.058	0.1672	0.4164	0.4461
999	Lipid transfer protein 5 OS=Nannochloropsis gaditana GN=Naga_100053g17 PE=4 SV=1	W7TS15_9STRA	Naga_100053g17	77 kDa	5	0.33	0.001	13.56	14.22	14.29	14.16	14	14.67	14.5	14.6	-0.5843	0.0661	0.1833	0.0421	-0.1309	0.5581	0.413	0.5218
1000	Urease OS=Nannochloropsis gaditana GN=Naga_100173g2 PE=3 SV=1	W7UAV2_9STRA	Naga_100173g2	96 kDa	6	0.25	0.001	15.4	15.47	15.5	15.6	15.73	15.64	15.71	15.93	-0.0857	-0.0415	-0.0095	0.0966	0.2384	0.142	0.2163	0.4077
1001	Heat shock protein OS=Nannochloropsis gaditana GN=Naga_100013g85 PE=4 SV=1	W7UCI7_9STRA	Naga_100013g85	28 kDa	6	0.24	0.001	16.71	16.68	16.78	16.67	17.04	16.89	16.99	16.84	-0.0314	-0.0537	0.0746	-0.0423	0.3282	0.1715	0.2776	0.13
1002	4-hydroxy-4-methyl-2-oxoglutarate aldolase (Fragment) OS=Nannochloropsis gaditana (strain CCMP526) GN=NGA_2073100 PE=3 SV=1	K8Z1R9_NANGC (+1)	NGA_2073100	19 kDa	6	0.38	0.001	15.75	15.89	15.86	15.85	16.27	16.02	16.37	16.24	-0.0918	0.0525	0.0224	0.0072	0.4389	0.193	0.5415	0.4075
1003	Uncharacterized protein OS=Nannochloropsis gaditana GN=Naga_100004g159 PE=4 SV=1	W7TMB1_9STRA	Naga_100004g159	38 kDa	5	0.25	0.001	16.15	16.17	16.33	16.11	16.51	16.44	16.46	16.35	-0.0395	-0.0282	0.1382	-0.0858	0.3185	0.2509	0.2591	0.1665
1004	Glutamate synthase (Fragment) OS=Nannochloropsis gaditana GN=Naga_101084g2 PE=4 SV=1	W7TIM4_9STRA	Naga_101084g2	15 kDa	6	0.69	0.001	16.4	16.42	16.52	16.38	17.18	17.08	17.22	17.05	-0.0182	-0.0181	0.0799	-0.0689	0.7589	0.6342	0.774	0.6132
1005	Transcription elongation factor spt6 OS=Nannochloropsis gaditana (strain CCMP526) GN=NGA_0478100 PE=4 SV=1	K8YW03_NANGC	NGA_0478100	139 kDa	6	0.2	0.001	15.67	15.63	15.86	15.73	15.99	15.85	15.92	15.99	-0.0605	-0.115	0.1268	-0.0008	0.2892	0.1163	0.1826	0.2657
1006	Vacuolar protein sorting-associated protein 13c OS=Nannochloropsis gaditana GN=Naga_100037g1 PE=4 SV=1	W7TQ63_9STRA	Naga_100037g1	487 kDa	6	0.37	0.001	15.17	15.01	15.24	15.16	15.7	15.5	15.43	15.43	-0.003	-0.1389	0.095	0.0194	0.543	0.3566	0.3121	0.3035
1007	Uncharacterized protein (Fragment) OS=Nannochloropsis gaditana (strain CCMP526) GN=NGATSA_2048400 PE=2 SV=1	I2CPH5_NANGC (+1)	NGATSA_2048400	36 kDa	5	0.27	0.001	16.01	16.21	16.24	16.24	16.36	16.39	16.46	16.58	-0.1647	0.0316	0.0675	0.0595	0.1814	0.2043	0.2823	0.4017
1008	30S ribosomal protein S19, chloroplastic OS=Nannochloropsis gaditana GN=rps19 PE=3 SV=1	K9ZV89_9STRA	rps19	11 kDa	5	-0.73	0.001	18.11	18.03	17.78	18.22	17.31	17.07	17.56	17.35	0.0289	-0.0462	-0.3364	0.146	-0.7658	-1.0103	-0.47	-0.7306
1009	Uncharacterized protein OS=Nannochloropsis gaditana GN=Naga_100003g100 PE=4 SV=1	W7TVR2_9STRA	Naga_100003g100	95 kDa	5	0.42	0.001	15.27	15.41	15.41	15.35	15.84	15.74	15.68	15.88	-0.1117	0.0555	0.086	-0.0164	0.4883	0.3873	0.326	0.5207
1010	Chorismate mutase OS=Nannochloropsis gaditana GN=CM PE=4 SV=1	W7U1H9_9STRA	CM	48 kDa	4	-0.3	0.001	15.97	15.82	15.88	15.95	15.67	15.49	15.54	15.72	0.0626	-0.0877	-0.0014	0.0509	-0.2721	-0.3943	-0.3672	-0.1699
1011	U1 small nuclear ribonucleoprotein 70 OS=Nannochloropsis gaditana GN=Naga_100023g50 PE=4 SV=1	W7TPI8_9STRA	Naga_100023g50	35 kDa	5	0.32	0.001	15.13	15.21	15.43	15.41	15.63	15.59	15.68	15.56	-0.1712	-0.0945	0.1323	0.1101	0.3233	0.2899	0.3804	0.2693
1012	Small nuclear ribonucleoprotein e OS=Nannochloropsis gaditana GN=Naga_100214g4 PE=4 SV=1	W7T2M8_9STRA	Naga_100214g4	18 kDa	5	0.32	0.001	16.21	15.83	16.02	15.92	16.47	16.26	16.34	16.16	0.2493	-0.1561	0.047	-0.0598	0.4772	0.2873	0.3615	0.1815
1013	Inosine triphosphate pyrophosphatase OS=Nannochloropsis gaditana GN=Naga_100051g15 PE=3 SV=1	W7TN51_9STRA	Naga_100051g15	29 kDa	5	0.22	0.001	17.05	16.99	16.91	16.94	17.29	17.21	17.16	17.12	0.0842	0.0174	-0.0725	-0.0347	0.3218	0.232	0.1819	0.15
1014	Nudix hydrolase OS=Nannochloropsis gaditana GN=Naga_100079g6 PE=4 SV=1	W7U2V7_9STRA	Naga_100079g6	28 kDa	5	0.25	0.001	14.52	14.44	14.49	14.57	14.74	14.58	15.01	14.72	0.024	-0.0527	-0.0156	0.063	0.2281	0.0814	0.4939	0.2157
1015	Ubiquinol cytochrome c reductase subunit qcr9 OS=Nannochloropsis gaditana GN=Naga_100015g34 PE=4 SV=1	W7U4G0_9STRA	Naga_100015g34	13 kDa	5	0.33	0.001	16.87	16.54	16.53	16.53	17.01	16.73	17.1	16.89	0.2515	-0.0719	-0.0785	-0.0874	0.3992	0.1153	0.4872	0.2922
1016	Amidohydrolase 2 OS=Nannochloropsis gaditana GN=Naga_100074g10 PE=4 SV=1	W7TWC5_9STRA (+1)	Naga_100074g10	45 kDa	5	0.31	0.001	14.44	14.65	14.72	14.6	14.92	15.01	14.79	14.96	-0.1675	0.0377	0.1074	-0.0106	0.2947	0.3986	0.1787	0.3585
1017	Uncharacterized protein OS=Nannochloropsis gaditana (strain CCMP526) GN=NGA_0606900 PE=4 SV=1	K8YSD6_NANGC (+1)	NGA_0606900	13 kDa	5	0.26	0.001	15.57	15.73	15.72	15.81	15.9	16.17	15.86	15.95	-0.1364	0.0099	0.0119	0.0978	0.1958	0.4603	0.1535	0.2456
1018	Methyltransferase FkbM OS=Nannochloropsis gaditana GN=Naga_100035g45 PE=4 SV=1	W7UAA9_9STRA	Naga_100035g45	40 kDa	5	-0.22	0.001	16.29	16.24	16.3	16.3	16.06	16.09	16	16.09	0.0059	-0.0492	0.0172	0.0125	-0.2242	-0.1947	-0.2748	-0.1949
1019	Uncharacterized protein OS=Nannochloropsis gaditana (strain CCMP526) GN=NGA_0115701 PE=4 SV=1	K8YTE9_NANGC (+1)	NGA_0115701	44 kDa	4	0.47	0.001	14.37	14.19	14.65	14.43	14.99	14.68	14.92	14.92	-0.0675	-0.2466	0.2083	-0.0083	0.5603	0.2457	0.5212	0.5117
1020	DNA polymerase sigma subunit (Fragment) OS=Nannochloropsis gaditana (strain CCMP526) GN=NGATSA_3036200 PE=2 SV=1	I2CPC2_NANGC	NGATSA_3036200	47 kDa	5	0.19	0.001	15.87	15.94	16.11	16.14	16.24	16.1	16.18	16.3	-0.139	-0.0767	0.0866	0.1231	0.2224	0.0869	0.1699	0.2869
1021	Rna binding protein OS=Nannochloropsis gaditana GN=Naga_100361g5 PE=4 SV=1	W7TMU8_9STRA	Naga_100361g5	35 kDa	6	0.38	0.001	14.94	14.79	14.99	14.74	15.25	15.14	15.2	15.33	0.0414	-0.0608	0.1385	-0.1215	0.3565	0.2926	0.3191	0.4759
1022	50S ribosomal protein L34, chloroplastic OS=Nannochloropsis gaditana GN=rpl34 PE=3 SV=1	K9ZVA8_9STRA	rpl34	6 kDa	5	-0.51	0.001	15.37	15.29	15.38	15.34	14.86	15.09	14.78	14.68	0.0236	-0.0556	0.0387	0.0003	-0.5144	-0.2323	-0.5449	-0.6688
1023	Bile acid:sodium symporter family protein OS=Nannochloropsis gaditana GN=Naga_100015g45 PE=4 SV=1	W7TNG8_9STRA	Naga_100015g45	44 kDa	4	-0.61	0.001	17.9	17.63	17.7	17.58	17.04	17.2	17.24	16.78	0.2389	-0.0493	0.0174	-0.0996	-0.6488	-0.4819	-0.4421	-0.9014
1024	Ribonucleoprotein LSM OS=Nannochloropsis gaditana GN=Lsm5 PE=4 SV=1	W7TDI3_9STRA	Lsm5	17 kDa	4	0.4	0.001	15.47	15.31	15.37	15.18	15.97	15.81	15.62	15.56	0.1368	-0.0202	0.039	-0.1588	0.6337	0.469	0.2913	0.2365
1025	Sulfate transporter OS=Nannochloropsis gaditana GN=Naga_100135g6 PE=4 SV=1	W7TY33_9STRA	Naga_100135g6	76 kDa	4	0.28	0.001	15.12	15.2	15.28	15.48	15.35	15.44	15.75	15.68	-0.1556	-0.0695	0.0108	0.2091	0.0802	0.1787	0.4838	0.4253
1026	6-phosphogluconolactonase OS=Nannochloropsis gaditana GN=Naga_100012g89 PE=4 SV=1	W7TMI5_9STRA	Naga_100012g89	31 kDa	4	0.24	0.001	14.46	14.41	14.41	14.46	14.69	14.52	14.76	14.74	0.0241	-0.0198	-0.0262	0.026	0.2804	0.083	0.3239	0.3047
1027	Nucleotide-binding, alpha-beta plait OS=Nannochloropsis gaditana GN=Naga_100245g2 PE=4 SV=1	W7T7S0_9STRA	Naga_100245g2	22 kDa	4	0.58	0.001	14.27	15.02	15.16	14.8	15.27	15.45	15.59	15.48	-0.581	0.1661	0.3073	-0.0473	0.4137	0.5951	0.6924	0.6205
1028	Ribonucleoside-diphosphate reductase subunit M2 OS=Nannochloropsis gaditana (strain CCMP526) GN=RRM2 PE=4 SV=1	K8Z661_NANGC (+1)	RRM2	34 kDa	4	-0.35	0.001	15.99	16.13	16.01	15.93	15.58	15.72	15.61	15.77	0.0003	0.115	-0.0043	-0.0813	-0.4235	-0.29	-0.3969	-0.273
1029	Nucleoside phosphorylase domain protein OS=Nannochloropsis gaditana GN=Naga_100003g166 PE=4 SV=1	W7TST5_9STRA	Naga_100003g166	29 kDa	4	0.17	0.001	16.75	16.88	16.77	16.7	16.86	17.06	16.99	16.86	-0.021	0.1087	-0.0145	-0.0723	0.0784	0.2804	0.2088	0.0764
1030	50S ribosomal protein L35, chloroplastic OS=Nannochloropsis gaditana GN=rpl35 PE=3 SV=1	K9ZVA2_9STRA	rpl35	8 kDa	4	-0.55	0.001	15.17	14.76	14.77	14.67	14.41	14.3	14.15	13.89	0.3783	-0.0411	-0.0322	-0.1275	-0.3944	-0.4964	-0.656	-0.9594
1031	Uncharacterized protein (Fragment) OS=Nannochloropsis gaditana GN=Naga_101034g2 PE=4 SV=1	W7TY53_9STRA	Naga_101034g2	13 kDa	4	-0.33	0.001	16.6	16.76	16.48	16.67	16.35	16.34	16.25	16.26	-0.0243	0.1257	-0.1471	0.0402	-0.2807	-0.2936	-0.3759	-0.3644
1032	Uncharacterized protein OS=Nannochloropsis gaditana GN=Naga_100802g4 PE=4 SV=1	W7UAQ8_9STRA	Naga_100802g4	23 kDa	4	-0.15	0.001	17.51	17.38	17.36	17.39	17.26	17.29	17.3	17.18	0.1044	-0.0315	-0.0562	-0.0179	-0.1413	-0.1087	-0.1068	-0.2248
1033	Ap-3 complex subunit delta-1 OS=Nannochloropsis gaditana GN=Naga_100036g1 PE=4 SV=1	W7TQ06_9STRA	Naga_100036g1	109 kDa	4	0.38	0.001	16.12	16.06	16.15	16.11	16.51	16.45	16.71	16.33	0.0075	-0.0379	0.032	-0.0061	0.3921	0.334	0.5826	0.2069
1034	Cysteine proteinase OS=Nannochloropsis gaditana GN=Naga_100039g23 PE=3 SV=1	W7TNV5_9STRA	Naga_100039g23	66 kDa	4	0.34	0.001	16.39	16.52	16.53	16.51	16.84	16.71	16.87	16.85	-0.0998	0.0191	0.0411	0.0313	0.3569	0.2192	0.3804	0.3651
1035	Phosphoinositol transporter OS=Nannochloropsis gaditana (strain CCMP526) GN=NGATSA_3008600 PE=2 SV=1	I2CQU5_NANGC (+1)	NGATSA_3008600	40 kDa	3	0.32	0.001	15.68	15.85	16.04	16.15	16.03	16.09	16.63	16.44	-0.2583	-0.0934	0.099	0.2137	0.0892	0.1528	0.7081	0.5105
1036	Uncharacterized protein OS=Nannochloropsis gaditana (strain CCMP526) GN=NGA_0014302 PE=4 SV=1	K8YTC4_NANGC (+1)	NGA_0014302	36 kDa	4	0.27	0.001	15.16	15.05	15.13	15.05	15.27	15.38	15.49	15.31	0.0579	-0.0439	0.0332	-0.0553	0.173	0.2818	0.3984	0.2223
1037	Calcium-transporting ATPase OS=Nannochloropsis gaditana GN=Naga_100003g171 PE=3 SV=1	W7TSK5_9STRA	Naga_100003g171	124 kDa	4	0.28	0.001	15.5	15.61	15.74	15.79	15.73	15.92	16.06	16.06	-0.196	-0.0757	0.0568	0.1014	0.095	0.2384	0.3738	0.3788
1038	Enyol-CoA hydratase OS=Nannochloropsis gaditana (strain CCMP526) GN=NGATSA_2015200 PE=2 SV=1	I2CR30_NANGC (+1)	NGATSA_2015200	30 kDa	4	0.35	0.001	17.02	17.22	16.94	16.94	17.5	17.61	17.25	17.11	-0.0095	0.1933	-0.0879	-0.0809	0.4692	0.5775	0.228	0.0867
1039	Methylcrotonoyl-carboxylase OS=Nannochloropsis gaditana GN=Naga_100053g29 PE=4 SV=1	W7TSL4_9STRA	Naga_100053g29	81 kDa	5	0.28	0.001	14.79	14.93	15.07	15.1	15.14	15.09	15.36	15.42	-0.1809	-0.0402	0.0921	0.1255	0.1568	0.1158	0.3827	0.4515
1040	Protein transport protein sec23a OS=Nannochloropsis gaditana GN=Naga_102251g1 PE=4 SV=1	W7THH9_9STRA	Naga_102251g1	14 kDa	3	0.29	0.001	16.66	16.77	16.76	16.73	17.02	16.99	17.09	16.99	-0.0739	0.0373	0.0308	-0.0038	0.2831	0.2592	0.357	0.2591
1041	Uncharacterized protein OS=Nannochloropsis gaditana GN=Naga_100010g26 PE=4 SV=1	W7TUG0_9STRA	Naga_100010g26	37 kDa	4	0.45	0.001	18.19	18.46	18.52	18.47	18.84	18.8	18.94	19.01	-0.2428	0.0276	0.0894	0.0362	0.4052	0.3613	0.5082	0.5732
1042	Zinc finger, C2H2 OS=Nannochloropsis gaditana GN=Naga_100001g175 PE=4 SV=1	W7U1A9_9STRA	Naga_100001g175	115 kDa	4	0.42	0.001	16.4	16.99	16.92	16.81	17.02	17.2	17.06	17.51	-0.4057	0.1818	0.1143	0.0095	0.2476	0.4183	0.2639	0.7446
1043	Uncharacterized protein OS=Nannochloropsis gaditana GN=Naga_100057g22 PE=4 SV=1	W7TAF2_9STRA	Naga_100057g22	24 kDa	3	0.29	0.001	15.31	15.63	15.34	15.34	15.81	15.61	15.72	15.66	-0.106	0.2193	-0.067	-0.062	0.4011	0.2244	0.313	0.2438
1044	S-adenosylmethionine-dependent methyltransferase domain-containing protein OS=Nannochloropsis gaditana GN=Naga_100106g3 PE=4 SV=1	W7TRI3_9STRA	Naga_100106g3	43 kDa	3	0.29	0.001	14.49	14.41	14.63	14.56	14.88	14.72	14.9	14.76	-0.03	-0.1079	0.1174	0.0358	0.4325	0.206	0.3778	0.2749
1045	Wsc domain containing 1 OS=Nannochloropsis gaditana GN=Naga_100463g4 PE=4 SV=1	W7TY47_9STRA	Naga_100463g4	63 kDa	3	-0.42	0.001	15.78	15.73	15.47	15.58	15.33	15.24	15.08	15.21	0.1135	0.0938	-0.1612	-0.041	-0.3063	-0.3974	-0.5598	-0.4283
1046	Glycerolipid omega-3 fatty acid desaturase (Fragment) OS=Nannochloropsis gaditana (strain CCMP526) GN=NGATSA_3013800 PE=2 SV=1	I2CR09_NANGC	NGATSA_3013800	51 kDa	3	-0.53	0.001	14.41	14.1	14.26	14.29	14.02	13.62	13.82	13.55	0.1439	-0.1584	-0.0328	0.032	-0.2957	-0.7125	-0.4539	-0.7019
1047	Cytochrome P450 enzyme OS=Nannochloropsis gaditana (strain CCMP526) GN=NGATSA_3007700 PE=2 SV=1	I2CNY8_NANGC	NGATSA_3007700	67 kDa	3	-0.78	0.001	14.89	14.26	14.92	14.62	13.86	14.06	13.74	13.95	0.1868	-0.455	0.2181	-0.0833	-0.793	-0.6076	-0.8806	-0.6619
1048	Uncharacterized protein OS=Nannochloropsis gaditana (strain CCMP526) GN=NGA_0493600 PE=4 SV=1	K8YY91_NANGC	NGA_0493600	35 kDa	3	-0.31	0.001	15.32	15.22	15.3	15.11	15	14.97	14.81	14.99	0.0794	-0.0179	0.0527	-0.1311	-0.2777	-0.2762	-0.4247	-0.2427
1049	Ubiquitin fusion degradation 1 OS=Nannochloropsis gaditana (strain CCMP526) GN=NGATSA_3013100 PE=2 SV=1	I2CR02_NANGC	NGATSA_3013100	30 kDa	3	0.34	0.001	15.73	15.61	15.7	15.7	15.99	16.07	16.13	15.87	0.0368	-0.0769	0.0197	0.0147	0.2927	0.3884	0.444	0.1849
1050	Insulin-degrading enzyme (Fragment) OS=Nannochloropsis gaditana (strain CCMP526) GN=NGATSA_3036900 PE=2 SV=1	I2CPZ0_NANGC	NGATSA_3036900	18 kDa	3	0.23	0.001	15.58	15.61	15.57	15.53	15.88	15.79	15.8	15.74	0.0062	0.0344	-0.0002	-0.0402	0.3009	0.2159	0.2278	0.176
1051	Cof-like hydrolase OS=Nannochloropsis gaditana (strain CCMP526) GN=NGA_0248800 PE=4 SV=1	K8Z3C9_NANGC (+1)	NGA_0248800	39 kDa	3	-0.28	0.001	15.92	15.86	15.81	15.95	15.61	15.65	15.61	15.53	0.0387	-0.0279	-0.0738	0.0663	-0.2715	-0.2364	-0.278	-0.3489
1052	Methylmalonate-semialdehyde dehydrogenase OS=Nannochloropsis gaditana GN=Naga_100986g3 PE=4 SV=1	W7TSF3_9STRA	Naga_100986g3	14 kDa	3	0.41	0.001	13.25	13.3	13.26	13.32	13.82	13.71	13.45	13.76	-0.0338	0.0203	-0.0185	0.0342	0.5471	0.4313	0.1766	0.4807
1053	Aspartate-semialdehyde dehydrogenase OS=Nannochloropsis gaditana GN=Naga_100189g5 PE=3 SV=1	W7TSS0_9STRA	Naga_100189g5	43 kDa	3	-0.29	0.001	15.67	15.73	15.66	15.62	15.52	15.19	15.34	15.51	0.0007	0.0588	-0.0089	-0.05	-0.1502	-0.4787	-0.3335	-0.1676
1054	Sulfhydryl oxidase (Fragment) OS=Nannochloropsis gaditana (strain CCMP526) GN=NGA_2121910 PE=4 SV=1	K8Z699_NANGC (+1)	NGA_2121910	27 kDa	3	0.34	0.001	15.9	15.83	15.93	16.04	16.12	16.32	16.39	16.27	-0.0309	-0.0967	0.0016	0.1165	0.1913	0.3966	0.4707	0.3449
1055	Uncharacterized protein (Fragment) OS=Nannochloropsis gaditana GN=Naga_100021g75 PE=4 SV=1	W7TZE0_9STRA	Naga_100021g75	36 kDa	3	0.37	0.001	15.84	15.71	15.5	15.48	16.14	16.12	16	15.73	0.2033	0.0728	-0.1334	-0.154	0.501	0.4869	0.3614	0.092
1056	Hemolysin-related protein OS=Nannochloropsis gaditana GN=Naga_100163g11 PE=4 SV=1	W7TVL3_9STRA	Naga_100163g11	86 kDa	3	0.22	0.001	16.45	16.44	16.51	16.47	16.77	16.58	16.62	16.76	-0.0159	-0.0265	0.0372	0.0131	0.3117	0.114	0.1508	0.2902
1057	ApaG domain protein OS=Nannochloropsis gaditana GN=Naga_100002g97 PE=4 SV=1	W7TRF5_9STRA	Naga_100002g97	53 kDa	2	-0.27	0.001	15.06	14.77	14.99	14.99	14.57	14.67	14.75	14.75	0.1019	-0.1847	0.0353	0.0412	-0.3861	-0.284	-0.2049	-0.2017
1058	Two component regulator propeller domain-containing protein (Fragment) OS=Nannochloropsis gaditana (strain CCMP526) GN=NGA_0724900 PE=4 SV=1	K8Z0G9_NANGC	NGA_0724900	27 kDa	3	1.03	0.001	14.4	14.28	14.38	14.1	15.25	15.27	15.37	15.84	0.1143	-0.0044	0.1007	-0.1822	0.9591	0.9406	1.048	1.4608
1059	Photosystem II protein Y OS=Nannochloropsis gaditana GN=psbY PE=3 SV=1	K9ZVH4_9STRA	psbY	4 kDa	3	-0.76	0.001	17.82	16.91	17.67	17.23	16.83	16.25	16.8	16.52	0.4071	-0.5018	0.2592	-0.1827	-0.5882	-1.2155	-0.609	-0.924
1060	Uncharacterized protein (Fragment) OS=Nannochloropsis gaditana GN=Naga_101710g1 PE=4 SV=1	W7T0W1_9STRA	Naga_101710g1	12 kDa	3	0.46	0.001	17.31	17.2	17.16	17.21	17.85	17.67	17.62	17.58	0.0817	-0.0203	-0.0635	-0.0091	0.6265	0.4483	0.4012	0.3546
1061	Carbohydrate binding family 6 (Fragment) OS=Nannochloropsis gaditana (strain CCMP526) GN=NGATSA_3012200 PE=2 SV=1	I2CQZ1_NANGC	NGATSA_3012200	47 kDa	3	0.42	0.001	15.8	15.96	16.03	16.1	16.23	16.25	16.39	16.82	-0.1781	-0.0191	0.0539	0.1239	0.2562	0.274	0.4091	0.8394
1062	Cdgsh iron sulfur domain-containing protein 1 OS=Nannochloropsis gaditana GN=CISD1 PE=4 SV=1	W7TPN8_9STRA	CISD1	23 kDa	3	0.72	0.001	18.22	17.76	17.99	17.93	18.93	18.35	19.02	18.46	0.2476	-0.2098	0.0133	-0.0434	0.9588	0.3785	1.0441	0.4905
1063	WD40-repeat-containing domain protein OS=Nannochloropsis gaditana GN=Naga_100449g3 PE=4 SV=1	W7TQQ8_9STRA	Naga_100449g3	49 kDa	2	0.33	0.001	15.69	15.82	15.84	15.88	16.14	16.15	16.21	16.09	-0.1169	0.0145	0.0315	0.0771	0.3313	0.3399	0.4002	0.2824
1064	Uncharacterized protein OS=Nannochloropsis gaditana GN=Naga_100026g30 PE=4 SV=1	W7U3N9_9STRA	Naga_100026g30	30 kDa	3	0.4	0.001	17.14	17.02	16.94	16.92	17.55	17.13	17.52	17.47	0.1281	0.0162	-0.061	-0.087	0.5477	0.1211	0.5109	0.462
1065	Hbs1-like protein OS=Nannochloropsis gaditana GN=Naga_100326g3 PE=4 SV=1	W7TEM4_9STRA	Naga_100326g3	85 kDa	3	0.26	0.001	15.6	15.64	15.78	15.58	15.92	15.91	15.86	15.94	-0.0568	-0.0037	0.1281	-0.0727	0.2636	0.2663	0.2135	0.301
1066	Protein phosphatase 2a structural subunit (Fragment) OS=Nannochloropsis gaditana (strain CCMP526) GN=NGATSA_3018400 PE=2 SV=1	I2CPQ6_NANGC	NGATSA_3018400	28 kDa	4	0.21	0.001	15.71	15.71	15.81	15.89	15.83	15.96	16.15	16.05	-0.0689	-0.0681	0.0338	0.1124	0.0473	0.1803	0.3674	0.275
1067	Rab8-family small gtpase OS=Nannochloropsis gaditana GN=Naga_100010g23 PE=4 SV=1	W7U3B0_9STRA	Naga_100010g23	23 kDa	2	0.39	0.001	14.54	14.22	14.45	14.61	14.9	14.8	14.91	14.75	0.0838	-0.2357	-0.0023	0.1473	0.4472	0.3462	0.4573	0.2934
1068	Ph domain-containing protein OS=Nannochloropsis gaditana (strain CCMP526) GN=NGATSA_3028000 PE=2 SV=1	I2CRH2_NANGC	NGATSA_3028000	17 kDa	2	0.29	0.001	16.27	16.1	16.27	16.12	16.49	16.58	16.54	16.34	0.0719	-0.0895	0.0783	-0.0732	0.2994	0.3884	0.3421	0.1511
1069	Guanylate kinase (Fragment) OS=Nannochloropsis gaditana (strain CCMP526) GN=GMK PE=4 SV=1	K8Z0D9_NANGC (+1)	GMK	36 kDa	2	0.27	0.001	16.14	16.14	16.09	16.06	16.33	16.56	16.28	16.39	0.0289	0.0326	-0.0236	-0.0496	0.2226	0.4503	0.1781	0.2806
1070	Uncharacterized protein OS=Nannochloropsis gaditana GN=Naga_100004g178 PE=4 SV=1	W7TQ93_9STRA	Naga_100004g178	27 kDa	2	0.42	0.001	14.31	14.23	14.2	14.4	14.48	14.74	14.69	14.87	0.0345	-0.0537	-0.082	0.1156	0.2001	0.4629	0.4054	0.5917
1071	Mitochondrial carrier domain-containing protein OS=Nannochloropsis gaditana GN=Naga_100002g51 PE=4 SV=1	W7U780_9STRA	Naga_100002g51	31 kDa	2	0.48	0.001	16	16.08	16.28	16.21	16.54	16.59	16.81	16.63	-0.1402	-0.0622	0.1356	0.0673	0.3938	0.4491	0.6653	0.492
1072	Fucose mutarotase-like protein OS=Nannochloropsis gaditana GN=Naga_100103g2 PE=4 SV=1	W7TTM5_9STRA	Naga_100103g2	17 kDa	2	0.5	0.001	16.28	16.1	16.36	16.11	16.59	16.63	16.77	16.85	0.0556	-0.1149	0.1364	-0.1105	0.3657	0.4151	0.5532	0.6363
1073	ATP-dependent RNA helicase DHX36 OS=Nannochloropsis gaditana (strain CCMP526) GN=NGATSA_3009200 PE=2 SV=1	I2CQV2_NANGC	NGATSA_3009200	93 kDa	2	0.66	0.001	14.93	14.86	15.39	15.23	15.61	15.76	15.88	15.87	-0.1909	-0.2647	0.2668	0.1053	0.4862	0.6409	0.7535	0.7405
1074	Uncharacterized protein OS=Nannochloropsis gaditana (strain CCMP526) GN=NGA_0557300 PE=4 SV=1	K8YP90_NANGC (+1)	NGA_0557300	23 kDa	2	1.01	0.001	14.62	15.56	15.44	15.26	16.27	16.55	16.05	16.37	-0.6791	0.26	0.1445	-0.0427	0.9702	1.2399	0.7362	1.0655
1075	4-hydroxyphenylpyruvate dioxygenase OS=Nannochloropsis gaditana GN=Naga_100291g3 PE=3 SV=1	W7TNB7_9STRA	Naga_100291g3	50 kDa	2	0.77	0.001	14.69	14.75	14.56	14.57	15.34	15.49	15.47	15.38	0.0427	0.1124	-0.0859	-0.0775	0.697	0.8404	0.8204	0.7332
1076	Uncharacterized protein (Fragment) OS=Nannochloropsis gaditana GN=Naga_101798g1 PE=4 SV=1	W7TGN4_9STRA	Naga_101798g1	24 kDa	2	0.68	0.001	17.39	17.66	17.49	17.58	18.45	17.99	18.05	18.39	-0.1468	0.1278	-0.0472	0.0439	0.9114	0.4547	0.5108	0.8514
1077	Heat shock protein DnaJ, cysteine-rich domain protein OS=Nannochloropsis gaditana GN=Naga_100689g1 PE=4 SV=1	W7TJ91_9STRA	Naga_100689g1	13 kDa	2	-0.78	0.001	17.31	16.83	16.68	16.8	16.31	16.31	15.94	15.57	0.4634	-0.02	-0.1692	-0.0555	-0.5479	-0.5378	-0.9105	-1.2834
1078	Uncharacterized protein OS=Nannochloropsis gaditana GN=Naga_100013g59 PE=4 SV=1	W7U3Y4_9STRA	Naga_100013g59	91 kDa	2	0.38	0.001	15.38	15.47	15.5	15.56	15.71	15.76	16.17	15.84	-0.1046	-0.0101	0.0171	0.0778	0.2298	0.2677	0.6872	0.3534
1079	Charged multivesicular body protein OS=Nannochloropsis gaditana GN=Naga_100012g56 PE=3 SV=1	W7T515_9STRA (+1)	Naga_100012g56	26 kDa	2	0.33	0.001	15.28	15.34	15.37	15.38	15.69	15.59	15.75	15.69	-0.0611	-0.0011	0.0303	0.0346	0.3495	0.2484	0.3976	0.3409
1080	Subtilisin inhibitor OS=Nannochloropsis gaditana GN=Naga_100159g3 PE=4 SV=1	W7T4E6_9STRA	Naga_100159g3	16 kDa	2	0.63	0.001	15.21	15.82	15.24	15.41	16.17	15.91	16.1	16.16	-0.2752	0.3602	-0.2171	-0.0448	0.6989	0.4545	0.6457	0.7069
1081	Amino acid transporter, transmembrane OS=Nannochloropsis gaditana GN=Naga_100126g7 PE=4 SV=1	W7T836_9STRA	Naga_100126g7	53 kDa	2	-0.32	0.001	17.04	17.08	17.06	17.02	16.74	16.79	16.8	16.58	-0.0104	0.0391	0.0079	-0.0301	-0.3113	-0.2627	-0.2456	-0.4733
1082	Zinc finger cchc domain-containing protein 7 OS=Nannochloropsis gaditana GN=Naga_100176g10 PE=4 SV=1	W7TQI3_9STRA	Naga_100176g10	32 kDa	2	0.48	0.001	14.12	14.41	14.38	14.45	14.91	14.67	14.82	14.94	-0.2356	0.0498	0.0243	0.0889	0.5556	0.3191	0.4673	0.5874
1083	Uncharacterized protein (Fragment) OS=Nannochloropsis gaditana GN=Naga_100887g5 PE=4 SV=1	W7TMU9_9STRA	Naga_100887g5	15 kDa	2	-0.59	0.001	16.93	17.06	16.92	16.88	16.2	16.46	16.26	16.58	-0.0081	0.1245	-0.0228	-0.0609	-0.7417	-0.4822	-0.6857	-0.3637
1084	Tata-box binding protein OS=Nannochloropsis gaditana GN=Naga_100044g16 PE=3 SV=1	W7TPR7_9STRA	Naga_100044g16	27 kDa	2	0.41	0.001	15.59	15.68	15.74	15.79	16.1	15.97	16.33	16.09	-0.1071	-0.0202	0.0487	0.095	0.4066	0.2638	0.6297	0.395
1085	Acid sphingomyelinase-like phosphodiesterase 3b OS=Nannochloropsis gaditana GN=Naga_100359g3 PE=4 SV=1	W7TQ09_9STRA	Naga_100359g3	76 kDa	2	1.3	0.001	15.82	15.9	16.14	15.94	17.25	17.04	17.39	17.3	-0.1156	-0.0327	0.2024	0.0066	1.3119	1.0981	1.4474	1.3582
1086	Uncharacterized protein OS=Nannochloropsis gaditana GN=Naga_100017g8 PE=4 SV=1	W7UAK0_9STRA	Naga_100017g8	14 kDa	2	1.05	0.001	17.56	17.41	17.68	17.44	18.83	18.49	18.73	18.4	0.0383	-0.1072	0.1699	-0.0767	1.2726	0.9603	1.2004	0.8812
1087	Uncharacterized protein OS=Nannochloropsis gaditana GN=Naga_101050g1 PE=4 SV=1	W7TZV9_9STRA	Naga_101050g1	30 kDa	2	0.36	0.001	14.93	15.3	15.31	15.36	15.66	15.58	15.42	15.75	-0.3128	0.059	0.0652	0.121	0.4171	0.3302	0.1797	0.5056
1088	6-phosphofructo-2-kinase fructose--bisphosphatase short form OS=Nannochloropsis gaditana GN=Naga_100015g63 PE=4 SV=1	W7TVS4_9STRA	Naga_100015g63	108 kDa	2	0.53	0.001	16.75	16.61	16.63	16.69	17.32	17.1	17.16	17.19	0.0819	-0.0592	-0.0383	0.0149	0.6469	0.4327	0.49	0.5169
1089	50S ribosomal protein L36, chloroplastic OS=Nannochloropsis gaditana GN=rpl36 PE=3 SV=1	K9ZXS5_9STRA	rpl36	4 kDa	2	-0.88	0.001	16.04	15.8	15.89	15.85	15.1	15.06	14.98	14.79	0.1468	-0.0919	0.0008	-0.0387	-0.7643	-0.7928	-0.8744	-1.0372
1090	NADH dehydrogenase (Ubiquinone) Fe-S protein 1 OS=Nannochloropsis gaditana (strain CCMP526) GN=NDUFS1 PE=4 SV=1	K8Z035_NANGC	NDUFS1	75 kDa	2	0.38	0.001	17.84	17.67	17.83	17.7	18.17	18.23	18.09	18.1	0.0806	-0.09	0.0723	-0.0603	0.4138	0.4734	0.3268	0.3346
1091	Endonuclease exonuclease phosphatase family protein OS=Nannochloropsis gaditana GN=Naga_100064g13 PE=4 SV=1	W7TF42_9STRA	Naga_100064g13	166 kDa	2	0.48	0.001	17.05	16.95	17.04	16.89	17.55	17.38	17.43	17.54	0.0662	-0.034	0.0597	-0.0898	0.5718	0.3923	0.4446	0.5561
1092	Beta-lactamase OS=Nannochloropsis gaditana GN=Naga_100589g1 PE=4 SV=1	W7TLC2_9STRA	Naga_100589g1	36 kDa	2	0.46	0.001	15.22	15.41	15.24	15.2	15.91	15.69	15.6	15.72	-0.0521	0.1383	-0.0353	-0.0697	0.6392	0.4207	0.3298	0.446
1093	Protein af-9 OS=Nannochloropsis gaditana GN=Naga_100014g11 PE=4 SV=1	W7U0E8_9STRA	Naga_100014g11	38 kDa	2	0.38	0.001	16.14	16.77	16.57	16.74	17.02	16.91	16.99	17.06	-0.4525	0.148	-0.0442	0.1318	0.4133	0.2999	0.3788	0.4462
1094	Aquaporin sip1-2 OS=Nannochloropsis gaditana (strain CCMP526) GN=NGA_0477601 PE=3 SV=1	K8YV92_NANGC	NGA_0477601	24 kDa	5	-0.4	0.0011	14.77	14.68	14.75	14.77	14.41	14.55	14.29	13.98	0.0254	-0.0643	0.0101	0.0285	-0.3265	-0.207	-0.4461	-0.7338
1095	S-adenosylmethionine mitochondrial carrier protein OS=Nannochloropsis gaditana (strain CCMP526) GN=NGA_0332400 PE=3 SV=1	K8YNL7_NANGC (+1)	NGA_0332400	27 kDa	2	0.39	0.0013	14.77	15.27	15.06	15.14	15.23	15.48	15.33	17.75	-0.2906	0.2044	0.0011	0.0781	0.1705	0.4223	0.2689	2.4136
1096	Uncharacterized protein OS=Nannochloropsis gaditana GN=Naga_100001g197 PE=4 SV=1	W7U151_9STRA	Naga_100001g197	43 kDa	2	0.61	0.0017	16.6	16.35	16.66	16.46	17.2	17.06	17.28	17.09	0.0646	-0.184	0.1273	-0.0752	0.661	0.5195	0.7395	0.5427
1097	Uncharacterized protein OS=Nannochloropsis gaditana GN=Naga_100109g14 PE=4 SV=1	W7U666_9STRA	Naga_100109g14	43 kDa	8	0.21	0.0017	16.7	16.52	16.57	16.53	16.78	16.64	16.88	16.83	0.1294	-0.0468	-0.0078	-0.0568	0.2114	0.0705	0.298	0.2704
1098	Serine/threonine-protein phosphatase OS=Nannochloropsis gaditana GN=PP PE=3 SV=1	W7TZP1_9STRA	PP	115 kDa	8	0.25	0.0019	15.27	15.16	15.31	15.37	15.62	15.41	15.64	15.45	-0.0101	-0.1269	0.0282	0.0718	0.3423	0.1339	0.3468	0.1551
1099	Uncharacterized protein OS=Nannochloropsis gaditana GN=Naga_102334g1 PE=4 SV=1	W7THK0_9STRA	Naga_102334g1	12 kDa	3	0.25	0.002	15.67	16.02	15.94	16.08	16.21	16.16	16.19	16.23	-0.3029	0.056	-0.008	0.1253	0.2531	0.2028	0.2385	0.2775
1100	Glycosyl hydrolase family 1 OS=Nannochloropsis gaditana GN=Naga_100075g15 PE=4 SV=1	W7T3D4_9STRA	Naga_100075g15	62 kDa	52	0.13	0.002	16.99	16.63	16.66	16.7	17.24	16.56	16.88	16.85	0.2503	-0.1062	-0.078	-0.0327	0.5004	-0.1818	0.1473	0.1157
1101	Histone H4 OS=Nannochloropsis gaditana GN=Naga_100050g29 PE=3 SV=1	W7TR01_9STRA (+1)	Naga_100050g29	14 kDa	51	0.21	0.002	16.74	16.4	16.78	16.96	16.92	16.52	17.18	17.06	0.0096	-0.318	0.0623	0.2348	0.1866	-0.2199	0.4526	0.3387
1102	Photosystem I reaction center subunit III OS=Nannochloropsis gaditana GN=psaF PE=4 SV=1	K9ZV47_9STRA	psaF	21 kDa	39	-0.17	0.002	16.21	16.25	16.32	16.28	16.13	16.04	16.1	16.18	-0.0442	-0.0133	0.0481	0.0223	-0.1483	-0.2236	-0.1712	-0.1033
1103	Cell division protein OS=Nannochloropsis gaditana GN=Naga_100098g5 PE=3 SV=1	W7TNK1_9STRA	Naga_100098g5	101 kDa	26	0.11	0.002	15.78	15.75	15.86	15.81	15.97	15.9	15.9	15.86	-0.0216	-0.0455	0.06	0.0069	0.1798	0.1021	0.0982	0.0662
1104	Acetyl-carboxylase alpha OS=Nannochloropsis gaditana GN=Naga_101049g3 PE=4 SV=1	W7T6R6_9STRA	Naga_101049g3	31 kDa	27	-0.15	0.002	15.94	15.97	15.93	15.9	15.79	15.69	15.92	15.71	-0.0178	0.0314	-0.0008	-0.0268	-0.1583	-0.2513	-0.0086	-0.2327
1105	Obg-like ATPase 1 OS=Nannochloropsis gaditana GN=Naga_100318g1 PE=3 SV=1	W7TL68_9STRA	Naga_100318g1	57 kDa	26	-0.12	0.002	16.06	16.04	16.04	16.09	15.93	15.92	15.99	15.94	-0.0022	-0.0109	-0.0135	0.0369	-0.1237	-0.134	-0.068	-0.117
1106	Trans-2-enoyl-reductase OS=Nannochloropsis gaditana GN=Naga_100016g22 PE=4 SV=1	W7TDT6_9STRA	Naga_100016g22	36 kDa	25	0.16	0.002	16.18	15.94	15.99	15.98	16.27	16.14	16.22	16.13	0.177	-0.0701	-0.0233	-0.0333	0.2532	0.1281	0.1981	0.1091
1107	Cinnamyl alcohol dehydrogenase OS=Nannochloropsis gaditana GN=Naga_100017g10 PE=3 SV=1	W7UAI2_9STRA	Naga_100017g10	39 kDa	26	0.18	0.002	16.43	16.47	16.27	16.2	16.51	16.6	16.48	16.46	0.093	0.1348	-0.0641	-0.1305	0.1772	0.2738	0.1429	0.1366
1108	Inositol-3-phosphate synthase OS=Nannochloropsis gaditana GN=Naga_100024g61 PE=4 SV=1	W7TSC4_9STRA	Naga_100024g61	64 kDa	23	0.19	0.002	15.55	15.53	15.52	15.57	15.65	15.74	15.76	15.77	0.0256	-0.0206	-0.0196	0.0333	0.0908	0.1848	0.2106	0.2057
1109	The actin binding protein cofilin-like protein OS=Nannochloropsis gaditana GN=Naga_100187g6 PE=3 SV=1	W7TKZ3_9STRA	Naga_100187g6	18 kDa	21	0.23	0.002	16.98	16.66	16.7	16.61	17.12	16.92	16.96	16.86	0.2567	-0.0549	-0.0191	-0.1189	0.3927	0.1926	0.238	0.1222
1110	Poly binding protein 8 OS=Nannochloropsis gaditana GN=Naga_100129g1 PE=4 SV=1	W7UCU5_9STRA	Naga_100129g1	33 kDa	21	-0.2	0.002	16.23	16.25	16.26	16.22	16.13	16.14	15.99	15.86	0.0086	0.0087	0.0221	-0.0162	-0.1155	-0.0931	-0.2434	-0.3791
1111	Uncharacterized protein OS=Nannochloropsis gaditana (strain CCMP526) GN=NGA_0252402 PE=4 SV=1	K8Z7L9_NANGC (+1)	NGA_0252402	16 kDa	19	-0.42	0.002	16.56	16.74	16.66	16.51	16.23	16.12	16.19	16.25	-0.0419	0.1223	0.048	-0.1089	-0.3889	-0.5109	-0.4232	-0.3613
1112	Proteasome subunit beta type OS=Nannochloropsis gaditana (strain CCMP526) GN=PSMB7 PE=3 SV=1	K8YNS6_NANGC (+1)	PSMB7	31 kDa	17	0.17	0.002	15.96	15.89	15.82	15.81	16.2	16	15.95	16.01	0.094	0.0218	-0.0632	-0.0554	0.3159	0.1154	0.0899	0.1349
1113	Light harvesting complex protein (Fragment) OS=Nannochloropsis gaditana (strain CCMP526) GN=NGA_0567402 PE=4 SV=1	K8YZX9_NANGC	NGA_0567402	79 kDa	15	0.22	0.002	16.08	16.12	16.21	16.14	16.42	16.33	16.4	16.31	-0.0455	-0.0215	0.062	-0.0018	0.2881	0.1973	0.249	0.1564
1114	Sigma 54 modulation protein ribosomal protein s30ea OS=Nannochloropsis gaditana GN=rps22 PE=4 SV=1	W7T4W9_9STRA	rps22	38 kDa	15	-0.15	0.002	15.59	15.32	15.55	15.43	15.5	15.2	15.34	15.24	0.1194	-0.1593	0.0776	-0.0426	0.024	-0.2752	-0.1164	-0.2472
1115	Uncharacterized protein OS=Nannochloropsis gaditana GN=Naga_100052g19 PE=4 SV=1	W7T4V0_9STRA (+1)	Naga_100052g19	68 kDa	14	0.32	0.002	16.12	16.07	15.94	16.11	16.67	16.14	16.32	16.59	0.0531	0.0031	-0.1244	0.049	0.6325	0.0656	0.2789	0.5148
1116	Threonine synthase OS=Nannochloropsis gaditana GN=TS PE=4 SV=1	W7TPM9_9STRA	TS	78 kDa	15	0.1	0.002	15.91	15.9	16.02	15.97	15.92	16.03	16.12	16.11	-0.0338	-0.0541	0.0769	0.0234	-0.0244	0.0936	0.1694	0.1662
1117	1,2-dihydroxy-3-keto-5-methylthiopentene dioxygenase OS=Nannochloropsis gaditana (strain CCMP526) GN=MTND PE=3 SV=1	K8Z2Y4_NANGC	MTND	40 kDa	12	0.26	0.002	15.99	15.69	15.96	15.84	16.2	16.06	16.22	16.12	0.1121	-0.1829	0.0767	-0.0324	0.3022	0.1877	0.3236	0.2253
1118	Vacuolar atpase subunit dva41 (Fragment) OS=Nannochloropsis gaditana GN=Naga_100031g1 PE=4 SV=1	W7U0A2_9STRA	Naga_100031g1	32 kDa	12	0.18	0.002	16.51	16.19	16.18	16.25	16.55	16.49	16.46	16.37	0.2299	-0.0853	-0.0954	-0.0326	0.266	0.2001	0.1798	0.086
1119	Peptidase aspartic OS=Nannochloropsis gaditana GN=Naga_100892g2 PE=4 SV=1	W7TUX8_9STRA	Naga_100892g2	95 kDa	11	0.27	0.002	15.82	16.02	16.14	16.11	16.1	16.3	16.36	16.45	-0.2273	-0.0132	0.0951	0.0784	0.0416	0.2763	0.3274	0.4268
1120	Glutamine-trna ligase OS=Nannochloropsis gaditana GN=GLNRS PE=3 SV=1	W7TED8_9STRA	GLNRS	76 kDa	10	0.18	0.002	15.3	15.38	15.63	15.61	15.55	15.58	15.76	15.8	-0.1817	-0.0972	0.1423	0.1289	0.0632	0.1019	0.2574	0.3289
1121	Histone family protein dna-binding protein OS=Nannochloropsis gaditana GN=Naga_100025g36 PE=3 SV=1	W7TGU1_9STRA	Naga_100025g36	15 kDa	11	0.19	0.002	17.19	17.04	17.04	16.87	17.56	17.06	17.25	17.09	0.1588	0.0012	0.0007	-0.1697	0.5165	0.0264	0.2127	0.0521
1122	Uncharacterized protein OS=Nannochloropsis gaditana GN=Naga_100017g53 PE=4 SV=1	W7UA21_9STRA	Naga_100017g53	37 kDa	10	-0.21	0.002	16.74	16.6	17.01	16.89	16.49	16.53	16.66	16.74	-0.0856	-0.2133	0.1769	0.0671	-0.3347	-0.2722	-0.1645	-0.0848
1123	Prp8 binding protein OS=Nannochloropsis gaditana (strain CCMP526) GN=NGATSA_2061700 PE=2 SV=1	I2CS67_NANGC (+2)	NGATSA_2061700	37 kDa	9	0.33	0.002	16.25	16.55	16.55	16.62	16.7	16.82	16.83	17.04	-0.2815	0.05	0.0518	0.1086	0.1585	0.3198	0.3098	0.5509
1124	Glycoside hydrolase family 31 protein OS=Nannochloropsis gaditana GN=Naga_100114g11 PE=3 SV=1	W7TU61_9STRA	Naga_100114g11	93 kDa	9	0.23	0.002	16.04	16.34	16.28	16.31	16.28	16.6	16.48	16.57	-0.2309	0.0816	0.026	0.047	0.0111	0.3373	0.2344	0.3172
1125	Calcyclin binding protein OS=Nannochloropsis gaditana (strain CCMP526) GN=NGATSA_3025900 PE=2 SV=1	I2CRF0_NANGC	NGATSA_3025900	20 kDa	8	0.16	0.002	16.71	16.63	16.65	16.56	16.92	16.88	16.72	16.67	0.0757	-0.0116	0.0119	-0.0772	0.2852	0.2433	0.0849	0.0366
1126	Component of the counting factor complex OS=Nannochloropsis gaditana GN=Naga_100087g16 PE=4 SV=1	W7TZ97_9STRA	Naga_100087g16	49 kDa	8	0.31	0.002	16.39	16.67	16.68	16.66	16.91	16.86	16.94	16.97	-0.227	0.0651	0.0677	0.0451	0.2689	0.2362	0.3118	0.3311
1127	SOUL heme-binding protein OS=Nannochloropsis gaditana GN=Naga_100002g125 PE=4 SV=1	W7U772_9STRA	Naga_100002g125	62 kDa	8	-0.22	0.002	16.41	16.4	16.41	16.44	16.17	16.17	16.25	16.21	-0.0021	-0.014	-0.0124	0.0246	-0.2634	-0.2688	-0.1863	-0.2188
1128	Uncharacterized protein OS=Nannochloropsis gaditana GN=Naga_100075g22 PE=4 SV=1	W7TCQ3_9STRA	Naga_100075g22	27 kDa	8	0.2	0.002	15.02	15.19	15.18	15.14	15.3	15.34	15.34	15.41	-0.0982	0.048	0.0603	-0.0028	0.1592	0.2328	0.2047	0.2724
1129	Pas pac sensor hybrid histidine kinase OS=Nannochloropsis gaditana (strain CCMP526) GN=NGA_2093300 PE=4 SV=1	K8Z061_NANGC (+1)	NGA_2093300	47 kDa	7	0.23	0.002	16.22	16.45	16.7	16.52	16.68	16.68	16.7	16.78	-0.2705	-0.0401	0.2364	0.043	0.1987	0.2195	0.2256	0.3164
1130	Pheromone shutdown, TraB OS=Nannochloropsis gaditana GN=Naga_100106g22 PE=4 SV=1	W7TUP6_9STRA	Naga_100106g22	48 kDa	6	0.28	0.002	14.87	14.96	15.18	14.88	15.33	15.38	15.12	15.26	-0.1146	-0.0296	0.1893	-0.116	0.3128	0.3888	0.1376	0.2925
1131	Hnrnp arginine n-methyltransferase OS=Nannochloropsis gaditana (strain CCMP526) GN=NGATSA_2018500 PE=2 SV=1	I2CP36_NANGC (+2)	NGATSA_2018500	62 kDa	6	0.25	0.002	15.38	15.64	15.66	15.55	15.9	15.81	15.69	15.9	-0.2045	0.0568	0.0822	-0.038	0.3104	0.2294	0.1115	0.3107
1132	Actin-like protein OS=Nannochloropsis gaditana GN=Naga_100034g22 PE=3 SV=1	W7TNT9_9STRA	Naga_100034g22	157 kDa	6	0.29	0.002	15.55	15.62	15.75	15.76	15.98	15.89	15.9	16.17	-0.1432	-0.076	0.0642	0.0731	0.2912	0.192	0.2096	0.4664
1133	Serine/threonine-protein phosphatase OS=Nannochloropsis gaditana GN=Naga_100031g16 PE=3 SV=1	W7TS65_9STRA	Naga_100031g16	35 kDa	6	0.23	0.002	15.97	16.14	16.02	15.85	16.21	16.19	16.25	16.28	-0.0364	0.1389	0.025	-0.1526	0.2089	0.213	0.2588	0.2773
1134	Uncharacterized protein OS=Nannochloropsis gaditana GN=Naga_100019g76 PE=4 SV=1	W7TL65_9STRA	Naga_100019g76	23 kDa	6	0.25	0.002	15.37	15.34	15.7	15.65	15.8	15.57	15.89	15.86	-0.158	-0.2076	0.1643	0.1184	0.2673	0.04	0.3565	0.3289
1135	Cell division cycle 2 OS=Nannochloropsis gaditana GN=CDKB PE=3 SV=1	W7TTH0_9STRA	CDKB	34 kDa	6	-0.25	0.002	16.95	16.91	16.85	16.9	16.68	16.66	16.66	16.6	0.0478	0.0004	-0.06	-0.0016	-0.2188	-0.2366	-0.2628	-0.3285
1136	Sporulation protein rmd1 OS=Nannochloropsis gaditana GN=Naga_100005g130 PE=4 SV=1	W7TXJ4_9STRA	Naga_100005g130	64 kDa	6	0.19	0.002	14.72	14.64	14.76	14.82	14.93	14.79	15.03	14.93	-0.0131	-0.0961	0.0193	0.0835	0.1983	0.0606	0.2985	0.1908
1137	AarF domain-containing protein kinase OS=Nannochloropsis gaditana GN=Naga_100068g4 PE=4 SV=1	W7TWK5_9STRA	Naga_100068g4	71 kDa	6	0.17	0.002	16.57	16.37	16.52	16.52	16.66	16.69	16.69	16.64	0.0846	-0.1193	0.0294	0.0175	0.166	0.1965	0.1962	0.1515
1138	6-phosphofructo-2-kinase / fructose-2,6-bisphosphatase OS=Nannochloropsis gaditana (strain CCMP526) GN=NGATSA_3008500 PE=2 SV=1	I2CQU3_NANGC	NGATSA_3008500	63 kDa	5	-0.46	0.002	15.83	15.44	15.49	15.45	15.25	14.7	15.23	14.93	0.2912	-0.1124	-0.0525	-0.1	-0.3027	-0.7982	-0.3204	-0.5949
1139	Uncharacterized protein OS=Nannochloropsis gaditana (strain CCMP526) GN=NGA_0078900 PE=4 SV=1	K8YRA7_NANGC (+1)	NGA_0078900	40 kDa	6	0.22	0.002	13.67	13.74	13.83	13.9	14.01	14.03	13.94	14.07	-0.1187	-0.0484	0.0453	0.1145	0.2466	0.2547	0.1521	0.2867
1140	Putative small multi-drug export OS=Nannochloropsis gaditana GN=Naga_100768g2 PE=4 SV=1	W7TYG3_9STRA	Naga_100768g2	35 kDa	5	-0.26	0.002	16.88	16.85	16.94	16.85	16.62	16.78	16.62	16.48	0.0017	-0.0384	0.0624	-0.032	-0.2678	-0.1025	-0.2616	-0.4064
1141	Uncharacterized protein OS=Nannochloropsis gaditana GN=Naga_100009g68 PE=4 SV=1	W7TYS5_9STRA	Naga_100009g68	65 kDa	5	-0.35	0.002	14.57	14.39	14.78	14.69	14.33	14.24	14.02	14.43	-0.0278	-0.1987	0.1847	0.0892	-0.2641	-0.3686	-0.5895	-0.1683
1142	Rho gtpase-activating protein 25 OS=Nannochloropsis gaditana GN=Naga_100042g16 PE=4 SV=1	W7U902_9STRA	Naga_100042g16	178 kDa	4	0.3	0.002	15.17	15.3	15.46	15.43	15.54	15.53	15.72	15.71	-0.1583	-0.0367	0.1244	0.0978	0.2021	0.2106	0.3787	0.3751
1143	Ubiquitin-protein ligase e3 rbbp6 family involved in mrna cleavage OS=Nannochloropsis gaditana (strain CCMP526) GN=NGA_0698200 PE=4 SV=1	K8ZBV7_NANGC	NGA_0698200	12 kDa	5	0.24	0.002	14.8	14.82	14.96	14.92	15.21	15.04	14.97	15.3	-0.1561	-0.0706	0.0733	0.0325	0.3299	0.1585	0.0769	0.4431
1144	Uncharacterized protein OS=Nannochloropsis gaditana GN=Naga_100065g20 PE=4 SV=1	W7TM32_9STRA	Naga_100065g20	43 kDa	4	-0.12	0.002	15.2	15.25	15.19	15.19	15.11	15.12	14.97	15.11	-0.0092	0.0357	-0.0089	-0.0116	-0.1044	-0.0876	-0.2413	-0.0936
1145	Dna polymerase i OS=Nannochloropsis gaditana GN=Naga_100020g74 PE=4 SV=1	W7TUD9_9STRA	Naga_100020g74	78 kDa	4	-0.17	0.002	15.89	15.94	15.95	16.01	15.86	15.9	15.71	15.65	-0.0548	-0.0069	-0.0017	0.0597	-0.0914	-0.0478	-0.2388	-0.2989
1146	50S ribosomal protein L33, chloroplastic OS=Nannochloropsis gaditana GN=rpl33 PE=3 SV=1	K9ZX90_9STRA	rpl33	7 kDa	4	-0.47	0.002	16.97	16.95	17.07	16.97	16.57	16.58	16.43	16.39	0.0152	-0.0497	0.0724	-0.0283	-0.37	-0.4098	-0.5114	-0.5713
1147	Leucine carboxyl methyltransferase OS=Nannochloropsis gaditana GN=Naga_100033g31 PE=4 SV=1	W7UC82_9STRA	Naga_100033g31	22 kDa	4	0.36	0.002	15.5	15.64	15.84	15.79	16.16	16.01	16.06	16.13	-0.1801	-0.0557	0.1531	0.0936	0.4846	0.3148	0.3621	0.4205
1148	Ribosome-associated, Iojap OS=Nannochloropsis gaditana GN=Naga_100879g3 PE=3 SV=1	W7THC1_9STRA (+1)	Naga_100879g3	32 kDa	3	-0.24	0.002	15.39	15.19	15.08	14.99	14.87	15.07	14.92	14.83	0.2308	0.0274	-0.0786	-0.1724	-0.2956	-0.097	-0.2453	-0.3406
1149	Glutathione s-transferase OS=Nannochloropsis gaditana GN=Naga_100141g16 PE=4 SV=1	W7U0V7_9STRA	Naga_100141g16	36 kDa	3	0.47	0.002	13.52	13.72	13.98	13.7	14.28	14.27	13.83	14.34	-0.2381	-0.0129	0.2461	-0.0316	0.5368	0.5162	0.1062	0.6045
1150	Uncharacterized protein OS=Nannochloropsis gaditana (strain CCMP526) GN=NGA_0599300 PE=4 SV=1	K8YPX5_NANGC	NGA_0599300	56 kDa	3	-0.27	0.002	17.5	17.37	17.37	17.51	17.18	17.06	17.36	17.1	0.0597	-0.0666	-0.0665	0.0712	-0.2515	-0.3705	-0.0861	-0.3358
1151	Deoxyribodipyrimidine photo-lyase OS=Nannochloropsis gaditana GN=Naga_100610g5 PE=4 SV=1	W7TBG1_9STRA	Naga_100610g5	60 kDa	3	-0.27	0.002	17.55	17.51	17.49	17.49	17.18	17.28	17.31	17.19	0.0416	-0.0022	-0.0179	-0.0191	-0.3129	-0.2303	-0.1951	-0.3159
1152	Rna pol ii accessory cdc73 family protein OS=Nannochloropsis gaditana GN=Naga_100034g12 PE=4 SV=1	W7U474_9STRA	Naga_100034g12	62 kDa	3	0.22	0.002	15.87	15.92	16.13	16.17	16.26	16.14	16.3	16.29	-0.148	-0.1082	0.0976	0.1401	0.2299	0.1149	0.2684	0.2616
1153	Receptor mediated endocytosis protein (Fragment) OS=Nannochloropsis gaditana GN=RME1 PE=3 SV=1	W7TVY1_9STRA	RME1	13 kDa	3	0.38	0.002	16.08	15.99	16.39	16.06	16.44	16.53	16.42	16.63	-0.019	-0.1507	0.2718	-0.0663	0.3049	0.4164	0.2869	0.5032
1154	Uncharacterized protein OS=Nannochloropsis gaditana (strain CCMP526) GN=NGATSA_2010400 PE=2 SV=1	I2CQX0_NANGC (+2)	NGATSA_2010400	51 kDa	2	0.34	0.002	14.89	15.1	15.2	15.13	15.37	15.5	15.42	15.39	-0.1815	0.0181	0.1209	0.0527	0.2949	0.4266	0.3416	0.3161
1155	Uncharacterized protein OS=Nannochloropsis gaditana GN=Naga_100054g26 PE=4 SV=1	W7TQQ5_9STRA	Naga_100054g26	27 kDa	2	0.36	0.002	15.31	14.99	15.03	14.96	15.34	15.53	15.48	15.38	0.2455	-0.0787	-0.0303	-0.1047	0.2797	0.4675	0.4152	0.3144
1156	Membrane associated eicosanoid/glutathione metabolism-like domain protein OS=Nannochloropsis gaditana GN=Naga_100189g2 PE=4 SV=1	W7TS96_9STRA	Naga_100189g2	18 kDa	2	0.19	0.002	17.21	17.24	17.34	17.19	17.49	17.35	17.55	17.38	-0.0348	-0.0089	0.096	-0.0535	0.2372	0.1062	0.3015	0.1317
1157	Mitogen-activated protein kinase kinase 1 interacting OS=Nannochloropsis gaditana GN=Naga_100209g7 PE=4 SV=1	W7T6S9_9STRA	Naga_100209g7	22 kDa	2	0.44	0.002	14.18	14.16	14.13	14.07	14.73	14.73	14.45	14.37	0.0493	0.0288	-0.0044	-0.0705	0.5943	0.5905	0.3231	0.2314
1158	Nudix hydrolase OS=Nannochloropsis gaditana (strain CCMP526) GN=NGA_0238400 PE=4 SV=1	K8Z527_NANGC	NGA_0238400	18 kDa	2	0.59	0.002	16.21	15.9	15.85	15.88	16.64	16.22	16.6	16.49	0.2549	-0.049	-0.0999	-0.0783	0.6934	0.2697	0.6439	0.5409
1159	Uncharacterized protein OS=Nannochloropsis gaditana GN=Naga_100162g2 PE=4 SV=1	W7TQG1_9STRA	Naga_100162g2	48 kDa	2	0.22	0.002	15.34	15.15	15.49	15.33	15.5	15.49	15.71	15.51	0.0119	-0.1788	0.1574	-0.0004	0.1693	0.1627	0.3848	0.1792
1160	Ornithine cyclodeaminase OS=Nannochloropsis gaditana GN=Naga_100781g1 PE=4 SV=1	W7TKR1_9STRA	Naga_100781g1	16 kDa	2	0.34	0.002	16.6	16.37	16.14	16.26	16.75	16.64	16.71	16.65	0.2512	0.0208	-0.2038	-0.0867	0.3944	0.2915	0.3584	0.3052
1161	Vacuolar protein sorting-associated protein 41 OS=Nannochloropsis gaditana GN=Naga_100017g17 PE=4 SV=1	W7TUN1_9STRA	Naga_100017g17	142 kDa	2	0.54	0.002	16.57	16.7	16.69	16.72	17.17	17.23	17.17	17.27	-0.0986	0.0298	0.0251	0.0506	0.4901	0.565	0.5024	0.5876
1162	Glucokinase OS=Nannochloropsis gaditana (strain CCMP526) GN=GLK PE=4 SV=1	K8YSA7_NANGC	GLK	40 kDa	4	0.22	0.002	16.78	16.66	16.77	16.65	17.13	16.82	17.14	16.78	0.0598	-0.0375	0.0439	-0.0768	0.3925	0.1036	0.3857	0.0577
1163	Pap fibrillin family protein OS=Nannochloropsis gaditana (strain CCMP526) GN=NGA_0174101 PE=4 SV=1	K8YU82_NANGC	NGA_0174101	34 kDa	16	0.17	0.0022	16.36	16.42	16.31	16.23	16.55	16.5	16.49	16.44	0.0513	0.0874	-0.0227	-0.1126	0.2298	0.1772	0.1514	0.1109
1164	Protein required for ethanol metabolism OS=Nannochloropsis gaditana GN=Naga_100522g4 PE=4 SV=1	W7TJZ2_9STRA	Naga_100522g4	48 kDa	4	-0.28	0.0023	16.58	16.35	16.36	16.34	16.18	16.25	16.2	15.89	0.1709	-0.0569	-0.0454	-0.0601	-0.2238	-0.1596	-0.2195	-0.5193
1165	Thioredoxin f OS=Nannochloropsis gaditana (strain CCMP526) GN=NGA_0042902 PE=4 SV=1	K8ZBP9_NANGC (+1)	NGA_0042902	16 kDa	23	-0.16	0.0026	17.64	17.4	17.36	17.37	17.48	17.23	17.19	17.18	0.222	-0.0362	-0.0639	-0.0608	0.0402	-0.1952	-0.244	-0.2623
1166	NADH-ubiquinone oxidoreductase chain 1 OS=Nannochloropsis gaditana GN=nd1 PE=3 SV=1	K9ZXU4_9STRA	nd1	36 kDa	3	-0.3	0.0027	15.71	15.67	15.7	15.5	15.22	15.6	15.45	15	0.0509	0.0095	0.0341	-0.1391	-0.4441	-0.0587	-0.2105	-0.7007
1167	Elongation factor 1 OS=Nannochloropsis gaditana GN=Naga_100041g2 PE=4 SV=1	W7TL25_9STRA	Naga_100041g2	49 kDa	39	0.12	0.003	16.75	16.57	16.83	16.81	16.88	16.77	16.96	16.8	0.0167	-0.1659	0.0923	0.0696	0.1349	0.041	0.2304	0.0522
1168	Proteasome subunit beta type OS=Nannochloropsis gaditana GN=Naga_100472g2 PE=3 SV=1	W7TIP5_9STRA	Naga_100472g2	24 kDa	26	0.1	0.003	16.21	16.14	16.07	16.03	16.24	16.28	16.22	16.16	0.0924	0.0295	-0.0481	-0.0844	0.1304	0.1642	0.1039	0.046
1169	Replication protein a 70 kDa dna-binding subunit OS=Nannochloropsis gaditana GN=Naga_100067g7 PE=4 SV=1	W7T7F5_9STRA	Naga_100067g7	75 kDa	25	-0.15	0.003	15.85	15.84	15.74	15.74	15.67	15.65	15.6	15.63	0.0439	0.0552	-0.0446	-0.0557	-0.1104	-0.1323	-0.1887	-0.1568
1170	Callose synthase 5 OS=Nannochloropsis gaditana GN=Naga_100114g16 PE=4 SV=1	W7U1M2_9STRA	Naga_100114g16	274 kDa	21	0.26	0.003	15.35	15.58	15.59	15.61	15.71	15.76	15.96	15.79	-0.1934	0.0411	0.0564	0.083	0.1666	0.2145	0.4133	0.2322
1171	Cluster of Ribose-phosphate pyrophosphokinase OS=Nannochloropsis gaditana GN=Naga_100250g4 PE=4 SV=1 (W7TQU0_9STRA)	W7TQU0_9STRA [2]	Naga_100250g4	68 kDa	8	0.38	0.003	15.94	15.91	15.88	15.86	16.21	16.15	16.49	16.17	-0.0009	-0.0078	0.0023	0.0009	0.3613	0.3018	0.6892	0.3413
1172	Uncharacterized protein OS=Nannochloropsis gaditana (strain CCMP526) GN=NGA_0681310 PE=4 SV=1	K8Z8S9_NANGC (+1)	NGA_0681310	23 kDa	16	0.14	0.003	15.96	15.86	15.96	15.87	16.12	15.96	16.1	16.05	0.0394	-0.0531	0.0506	-0.0423	0.2033	0.037	0.1789	0.125
1173	Uncharacterized protein OS=Nannochloropsis gaditana GN=Naga_100027g39 PE=4 SV=1	W7TTS5_9STRA	Naga_100027g39	313 kDa	11	0.2	0.003	14.45	14.56	14.69	14.61	14.65	14.78	14.88	14.85	-0.1527	-0.0262	0.1035	0.0231	0.0572	0.1906	0.2864	0.2668
1174	Cathepsin b OS=Nannochloropsis gaditana GN=Naga_100022g13 PE=3 SV=1	W7TUA6_9STRA	Naga_100022g13	53 kDa	13	0.34	0.003	15.87	15.81	15.79	15.77	16.33	16.09	16.05	16.05	0.0842	0.0078	-0.0119	-0.0361	0.5231	0.2938	0.2278	0.2312
1175	Alpha-actinin-4 OS=Nannochloropsis gaditana GN=abpA PE=4 SV=1	W7TDK0_9STRA	abpA	109 kDa	10	0.2	0.003	16.28	16.11	16.24	16.27	16.32	16.35	16.58	16.45	0.0442	-0.1106	0.0182	0.048	0.0977	0.1339	0.3583	0.2414
1176	Carboxypeptidase OS=Nannochloropsis gaditana GN=Naga_100002g136 PE=3 SV=1	W7TR82_9STRA	Naga_100002g136	66 kDa	11	0.29	0.003	16.21	16.09	16.2	16.15	16.61	16.17	16.45	16.62	0.0536	-0.0769	0.039	-0.0144	0.4497	0.0165	0.2757	0.4339
1177	Uncharacterized protein OS=Nannochloropsis gaditana GN=Naga_100177g12 PE=4 SV=1	W7TYV0_9STRA	Naga_100177g12	88 kDa	11	0.11	0.003	15.2	15.34	15.19	15.3	15.45	15.33	15.33	15.35	-0.0541	0.0757	-0.0644	0.0381	0.1963	0.0737	0.0701	0.095
1178	S-formylglutathione hydrolase (Fragment) OS=Nannochloropsis gaditana (strain CCMP526) GN=FRMB PE=3 SV=1	K8Z4L7_NANGC	FRMB	33 kDa	10	0.19	0.003	15.88	16.01	16.03	16.01	16.08	16.19	16.2	16.22	-0.106	0.015	0.0397	0.0276	0.1011	0.1982	0.2197	0.2277
1179	Eukaryotic translation initiation factor 4 OS=Nannochloropsis gaditana GN=EIF4G PE=4 SV=1	W7TC97_9STRA	EIF4G	125 kDa	10	0.14	0.003	15.91	15.7	15.91	15.95	15.99	16	16.05	15.99	0.0297	-0.1656	0.0435	0.0808	0.1306	0.1426	0.1849	0.1387
1180	Methyltransferase type 11 OS=Nannochloropsis gaditana (strain CCMP526) GN=NGA_0334100 PE=4 SV=1	K8YR33_NANGC (+1)	NGA_0334100	38 kDa	8	0.29	0.003	17.17	17	17.12	17.06	17.37	17.4	17.45	17.22	0.0907	-0.0828	0.0221	-0.0139	0.2993	0.321	0.3667	0.1501
1181	Circadian rna-binding protein chlamy 1 subunit c1 OS=Nannochloropsis gaditana GN=CRB1m PE=4 SV=1	W7TM52_9STRA	CRB1m	35 kDa	8	-0.16	0.003	15.41	15.33	15.39	15.4	15.31	15.24	15.22	15.13	0.0409	-0.0421	-0.0008	0.0179	-0.0709	-0.1342	-0.1712	-0.2565
1182	Acetyl-hydrolase transferase OS=Nannochloropsis gaditana GN=Naga_100134g17 PE=4 SV=1	W7U000_9STRA	Naga_100134g17	53 kDa	7	0.44	0.003	15.46	15.25	15.32	15.3	15.86	15.64	15.79	15.75	0.1416	-0.0728	-0.0076	-0.0229	0.4757	0.3011	0.4574	0.4151
1183	Mitochondrial 2-oxoglutarate malate carrier OS=Nannochloropsis gaditana GN=Naga_100004g149 PE=3 SV=1	W7TQ20_9STRA	Naga_100004g149	34 kDa	6	0.33	0.003	15.45	15.57	15.65	15.66	15.84	15.85	16	15.97	-0.1277	0.0075	0.0669	0.0767	0.2457	0.2804	0.4126	0.3828
1184	Ferredoxin OS=Nannochloropsis gaditana GN=Naga_100004g151 PE=4 SV=1	W7U5Y2_9STRA	Naga_100004g151	15 kDa	7	-0.52	0.003	14.71	14.33	14.69	14.29	14.13	14.02	13.79	14.03	0.1997	-0.1746	0.2051	-0.2046	-0.3586	-0.4743	-0.71	-0.4766
1185	Kynurenine 3-monooxygenase OS=Nannochloropsis gaditana (strain CCMP526) GN=NGA_0179000 PE=4 SV=1	K8YTP2_NANGC (+1)	NGA_0179000	54 kDa	6	-0.18	0.003	16.64	16.7	16.87	16.88	16.55	16.51	16.69	16.61	-0.1402	-0.0827	0.0936	0.1018	-0.2129	-0.2726	-0.0901	-0.1728
1186	Protein mago nashi OS=Nannochloropsis gaditana (strain CCMP526) GN=MAGOH PE=4 SV=1	K8YWZ3_NANGC (+1)	MAGOH	17 kDa	6	0.2	0.003	17.37	17.1	17.29	17.2	17.49	17.39	17.57	17.3	0.1294	-0.135	0.0479	-0.0356	0.2473	0.1522	0.333	0.0609
1187	Nudix hydrolase (Fragment) OS=Nannochloropsis gaditana (strain CCMP526) GN=NGATSA_3004900 PE=2 SV=1	I2CQR3_NANGC (+1)	NGATSA_3004900	43 kDa	5	0.29	0.003	15.86	15.83	15.83	15.75	16.1	16.12	16.07	16.13	0.062	0.0119	0.0156	-0.0672	0.2934	0.3016	0.2444	0.2991
1188	Uncharacterized protein OS=Nannochloropsis gaditana (strain CCMP526) GN=NGA_0248510 PE=4 SV=1	K8Z0G2_NANGC (+1)	NGA_0248510	55 kDa	5	0.28	0.003	14.72	15.36	15.38	14.96	15.31	15.58	15.32	15.4	-0.391	0.2254	0.2678	-0.1641	0.1977	0.4738	0.2235	0.3259
1189	Mannitol 1-phosphate dehydrogenase OS=Nannochloropsis gaditana (strain CCMP526) GN=NGATSA_3006700 PE=2 SV=1	I2CQS8_NANGC	NGATSA_3006700	69 kDa	5	0.19	0.003	16.53	16.81	16.67	16.74	16.77	16.94	16.9	16.88	-0.156	0.1214	-0.0133	0.0656	0.0879	0.2549	0.218	0.2075
1190	Mitochondrial 3-hydroxyisobutyryl-hydrolase OS=Nannochloropsis gaditana GN=Naga_100004g153 PE=4 SV=1	W7TMC9_9STRA	Naga_100004g153	71 kDa	5	-0.24	0.003	17.34	17.2	17.14	17.19	16.95	16.99	17.06	16.89	0.1557	-0.0016	-0.0699	-0.0161	-0.2527	-0.224	-0.1533	-0.3171
1191	3-ketoacyl-synthase 11 OS=Nannochloropsis gaditana GN=Naga_100174g4 PE=4 SV=1	W7TN43_9STRA	Naga_100174g4	74 kDa	5	0.32	0.003	15.17	15.31	15.34	15.37	15.56	15.37	15.84	15.65	-0.1267	0.0105	0.0453	0.0837	0.2632	0.0806	0.5434	0.3494
1192	D-lactate dehydrogenase OS=Nannochloropsis gaditana GN=Naga_100082g16 PE=4 SV=1	W7TKD9_9STRA	Naga_100082g16	65 kDa	4	0.22	0.003	13.22	13.41	13.56	13.53	13.53	13.56	13.77	13.77	-0.2093	-0.031	0.1209	0.0941	0.0921	0.1191	0.3304	0.3333
1193	H aca ribonucleoprotein complex subunit 2-like protein OS=Nannochloropsis gaditana GN=Naga_100002g100 PE=4 SV=1	W7U789_9STRA	Naga_100002g100	16 kDa	4	0.24	0.003	16.41	16.13	16.28	16.33	16.56	16.42	16.68	16.46	0.1187	-0.1611	-0.0118	0.0276	0.2722	0.1338	0.3937	0.1494
1194	Lactase-phlorizin hydrolase OS=Nannochloropsis gaditana GN=Naga_100095g6 PE=4 SV=1	W7TRP1_9STRA	Naga_100095g6	76 kDa	4	0.27	0.003	15.85	15.75	15.89	15.71	16.24	15.82	16.18	16.11	0.0414	-0.0549	0.0884	-0.092	0.4396	0.0165	0.3766	0.3079
1195	Mitogen-activated protein kinase OS=Nannochloropsis gaditana (strain CCMP526) GN=NGA_0181800 PE=3 SV=1	K8Z8C5_NANGC (+1)	NGA_0181800	61 kDa	4	0.27	0.003	15.38	15.76	15.56	15.56	15.82	15.85	15.76	15.9	-0.1844	0.1967	-0.0058	-0.0013	0.2556	0.2915	0.2092	0.3461
1196	Rhodopsin-like GPCR transmembrane domain protein OS=Nannochloropsis gaditana GN=Naga_100112g8 PE=4 SV=1	W7U9N5_9STRA	Naga_100112g8	48 kDa	4	-0.33	0.003	16.98	17.52	17.31	17.32	16.97	16.9	16.94	17.07	-0.3108	0.2284	0.0185	0.0322	-0.3232	-0.3993	-0.3539	-0.2567
1197	Alpha beta hydrolase fold protein (Fragment) OS=Nannochloropsis gaditana (strain CCMP526) GN=NGATSA_3042100 PE=2 SV=1	I2CPL0_NANGC	NGATSA_3042100	32 kDa	3	-0.27	0.003	15.85	15.84	15.85	15.95	15.49	15.78	15.5	15.62	-0.0203	-0.0304	-0.0226	0.0749	-0.3921	-0.0874	-0.3671	-0.2497
1198	Uncharacterized protein family CreA OS=Nannochloropsis gaditana GN=Naga_100048g11 PE=4 SV=1	W7TIH3_9STRA	Naga_100048g11	43 kDa	3	0.34	0.003	15.25	14.93	15.03	15.07	15.64	15.12	15.42	15.42	0.1834	-0.1307	-0.0438	-0.0007	0.5781	0.0567	0.3574	0.3547
1199	5'-AMP-activated protein kinase, regulatory gamma subunit OS=Nannochloropsis gaditana (strain CCMP526) GN=NGATSA_3025000 PE=2 SV=1	I2CP89_NANGC	NGATSA_3025000	37 kDa	3	0.29	0.003	14.6	14.58	14.74	14.58	14.9	14.91	14.97	14.9	-0.023	-0.0417	0.1063	-0.0441	0.2691	0.2693	0.3422	0.2707
1200	Uncharacterized protein (Fragment) OS=Nannochloropsis gaditana GN=Naga_101245g2 PE=4 SV=1	W7TSZ1_9STRA	Naga_101245g2	16 kDa	2	-0.25	0.003	17.06	17.08	17.15	16.98	16.72	16.85	16.86	16.84	-0.0091	0.0116	0.0825	-0.0856	-0.352	-0.2189	-0.2061	-0.2282
1201	Fad dependent oxidoreductase OS=Nannochloropsis gaditana GN=Naga_100515g1 PE=4 SV=1	W7TPQ1_9STRA	Naga_100515g1	31 kDa	3	0.27	0.003	13.97	13.89	13.95	13.96	14.05	14.18	14.34	14.28	0.0373	-0.0509	0.0077	0.0175	0.1099	0.2443	0.4059	0.3349
1202	Uncharacterized protein OS=Nannochloropsis gaditana GN=Naga_101091g3 PE=4 SV=1	W7TLH6_9STRA	Naga_101091g3	19 kDa	3	0.71	0.003	15.39	15.64	15.61	15.76	16.13	16.23	16.41	16.39	-0.233	0.0137	-0.0099	0.1404	0.4885	0.6099	0.7813	0.7635
1203	Alpha carbonic anhydrase OS=Nannochloropsis gaditana GN=Naga_100335g4 PE=4 SV=1	W7THX2_9STRA	Naga_100335g4	38 kDa	2	0.65	0.003	15.21	15.36	15.66	15.86	16.03	15.7	16.34	16.63	-0.3277	-0.1747	0.1318	0.3245	0.4973	0.1672	0.8129	1.102
1204	Peroxiredoxin 5, atypical 2-Cys peroxiredoxin OS=Nannochloropsis gaditana (strain CCMP526) GN=PRDX5 PE=4 SV=1	K8YR32_NANGC (+1)	PRDX5	19 kDa	2	0.31	0.003	14.86	14.75	15.02	14.9	15.21	15.31	15.21	15.06	-0.0309	-0.1421	0.1313	0.0157	0.3202	0.4313	0.3207	0.1737
1205	Isoamyl acetate-hydrolyzing esterase 1-like protein OS=Nannochloropsis gaditana (strain CCMP526) GN=NGA_0110701 PE=4 SV=1	K8Z6E0_NANGC (+1)	NGA_0110701	38 kDa	2	0.35	0.003	14.64	14.85	14.83	14.77	14.98	15.01	15.27	15.23	-0.1382	0.0773	0.0453	-0.0097	0.1994	0.2307	0.4946	0.4496
1206	Uncharacterized protein OS=Nannochloropsis gaditana GN=Naga_100012g83 PE=4 SV=1	W7TDH2_9STRA	Naga_100012g83	27 kDa	2	0.4	0.003	15.1	15.05	15.35	15.15	15.25	15.56	15.66	15.72	-0.0605	-0.1059	0.1958	-0.0086	0.0928	0.4001	0.4985	0.5664
1207	Ribosomal protein s21 OS=Nannochloropsis gaditana GN=Naga_100191g16 PE=3 SV=1	W7TSY1_9STRA	Naga_100191g16	14 kDa	2	-0.9	0.003	15.73	15.06	15.83	15.92	14.41	14.73	14.97	14.97	0.0337	-0.6359	0.1223	0.221	-1.2845	-1.0591	-0.7311	-0.7424
1208	Smr domain-containing OS=Nannochloropsis gaditana (strain CCMP526) GN=NGATSA_3006300 PE=2 SV=1	I2CPA6_NANGC	NGATSA_3006300	46 kDa	3	0.38	0.003	15	15.06	15.34	14.99	15.5	15.55	15.42	15.45	-0.083	-0.0217	0.2525	-0.0937	0.4157	0.4441	0.3359	0.3634
1209	Uncharacterized protein OS=Nannochloropsis gaditana GN=Naga_100071g7 PE=4 SV=1	W7TS82_9STRA	Naga_100071g7	20 kDa	2	0.48	0.003	16.95	16.55	16.81	16.64	17.56	17.17	17.4	16.81	0.2082	-0.1877	0.0754	-0.0969	0.8205	0.4341	0.6608	0.0779
1210	Protein kinase, ATP binding site OS=Nannochloropsis gaditana GN=Naga_100002g129 PE=4 SV=1	W7TZ76_9STRA	Naga_100002g129	72 kDa	2	0.41	0.003	16.18	16.69	16.64	16.55	16.9	17.03	16.79	17.07	-0.3505	0.1543	0.1073	0.0222	0.3716	0.498	0.2545	0.5334
1211	Uncharacterized protein OS=Nannochloropsis gaditana GN=Naga_100013g5 PE=4 SV=1	W7UCJ0_9STRA	Naga_100013g5	27 kDa	2	-0.51	0.003	15.8	15.69	15.6	15.74	15.44	15.43	15.07	14.9	0.0902	-0.0188	-0.1089	0.0311	-0.2624	-0.283	-0.6404	-0.8111
1212	Dt1p1a10l protein OS=Nannochloropsis gaditana (strain CCMP526) GN=NGA_0350200 PE=4 SV=1	K8YUD8_NANGC (+1)	NGA_0350200	14 kDa	2	0.28	0.003	14.42	14.6	14.58	14.52	14.75	14.83	14.68	14.98	-0.11	0.0653	0.0448	-0.0118	0.2214	0.2968	0.1496	0.4467
1213	U6 snrna-associated sm-like protein lsm4 OS=Nannochloropsis gaditana GN=Naga_100065g3 PE=4 SV=1	W7TE23_9STRA	Naga_100065g3	15 kDa	2	0.4	0.003	14.85	14.93	15.17	14.98	15.35	15.5	15.22	15.53	-0.1674	-0.0705	0.1682	-0.0141	0.3559	0.5022	0.2255	0.5364
1214	Hect e3 ubiquitin OS=Nannochloropsis gaditana GN=Naga_100002g6 PE=4 SV=1	W7TNU5_9STRA	Naga_100002g6	83 kDa	2	0.38	0.003	15.18	15.38	15.42	15.48	15.83	15.8	15.71	15.69	-0.183	0.0102	0.0495	0.1108	0.4617	0.4304	0.3495	0.3283
1215	Uncharacterized protein OS=Nannochloropsis gaditana GN=Naga_100124g8 PE=4 SV=1	W7TU88_9STRA	Naga_100124g8	94 kDa	2	0.42	0.003	15.64	15.75	15.98	15.79	16.23	16.22	16.09	16.24	-0.151	-0.0469	0.1885	-0.0012	0.4317	0.4291	0.2958	0.4518
1216	Mediator of rna polymerase ii transcription OS=Nannochloropsis gaditana GN=Naga_100062g8 PE=4 SV=1	W7TM51_9STRA (+1)	Naga_100062g8	44 kDa	2	0.6	0.003	16.52	16.35	16.5	16.29	16.99	16.99	17.05	17.09	0.0991	-0.07	0.0859	-0.1253	0.5533	0.5681	0.6318	0.6639
1217	Uncharacterized protein OS=Nannochloropsis gaditana GN=Naga_100008g54 PE=4 SV=1	W7TPM4_9STRA	Naga_100008g54	36 kDa	6	0.26	0.0031	15.73	15.42	15.65	15.55	15.73	15.88	15.94	15.87	0.1327	-0.1717	0.0561	-0.0438	0.1405	0.277	0.3491	0.2847
1218	RNA polymerase II subunit A OS=Nannochloropsis gaditana GN=Naga_100010g38 PE=4 SV=1	W7TMA9_9STRA	Naga_100010g38	33 kDa	3	0.29	0.0031	14.01	14.24	14.21	14.13	14.38	14.32	14.47	14.58	-0.1255	0.0669	0.0776	-0.0107	0.2325	0.1724	0.3202	0.4343
1219	Uncharacterized protein OS=Nannochloropsis gaditana GN=Naga_100040g21 PE=4 SV=1	W7TTW2_9STRA	Naga_100040g21	34 kDa	37	0.1	0.0032	15.28	15.21	15.12	15.13	15.5	15.09	15.27	15.32	0.0884	0.0316	-0.0639	-0.0558	0.3265	-0.0909	0.0823	0.1302
1220	Serine threonine protein phosphatase type 2a regulatory subunit a (Fragment) OS=Nannochloropsis gaditana (strain CCMP526) GN=NGATSA_3055700 PE=2 SV=1	I2CPP2_NANGC (+1)	NGATSA_3055700	23 kDa	6	0.33	0.0032	15.24	15.48	15.34	15.47	15.5	15.75	15.82	15.85	-0.1721	0.0853	-0.0732	0.0748	0.0918	0.3151	0.4374	0.4631
1221	AP-4 complex subunit sigma-1 OS=Nannochloropsis gaditana (strain CCMP526) GN=AP4S1 PE=4 SV=1	K8YMW9_NANGC (+1)	AP4S1	19 kDa	2	0.33	0.0032	15.9	16.1	16.12	16.21	16.52	16.32	16.4	16.55	-0.2143	-0.011	0.0052	0.1026	0.4149	0.2132	0.2933	0.4449
1222	Histone deacetylase OS=Nannochloropsis gaditana GN=Naga_100017g40 PE=3 SV=1	W7UAJ6_9STRA	Naga_100017g40	54 kDa	5	0.35	0.0033	16.35	16.19	16.42	16.53	17.09	16.5	16.68	16.92	-0.0268	-0.1847	0.0381	0.146	0.7006	0.1241	0.2969	0.5257
1223	Uncharacterized protein (Fragment) OS=Nannochloropsis gaditana (strain CCMP526) GN=NGA_2115700 PE=4 SV=1	K8YRA6_NANGC (+1)	NGA_2115700	81 kDa	33	-0.2	0.0035	16.25	16.15	16.41	16.34	16.07	16.11	16.02	16.14	-0.0546	-0.1349	0.124	0.0449	-0.2186	-0.1791	-0.2729	-0.1213
1224	20 kDa chaperonin OS=Nannochloropsis gaditana GN=Naga_100122g11 PE=3 SV=1	W7TNB8_9STRA	Naga_100122g11	27 kDa	32	-0.15	0.0036	16.55	16.48	16.39	16.45	16.48	16.25	16.28	16.25	0.0983	0.0221	-0.0853	-0.006	0.005	-0.221	-0.1866	-0.2125
1225	Malate synthase OS=Nannochloropsis gaditana GN=Naga_100102g16 PE=4 SV=1	W7THH1_9STRA	Naga_100102g16	63 kDa	15	0.13	0.0037	15.46	15.41	15.39	15.36	15.54	15.51	15.53	15.56	0.0603	-0.0022	-0.0193	-0.0506	0.1368	0.1191	0.1374	0.1484
1226	Atp-dependent zinc metalloprotease ftsh mitochondrial-like protein OS=Nannochloropsis gaditana GN=Naga_100015g28 PE=3 SV=1	W7TKG2_9STRA	Naga_100015g28	83 kDa	11	0.11	0.0037	16.12	16.09	16.23	16.25	16.17	16.15	16.42	16.4	-0.0592	-0.0737	0.0498	0.0752	0.0154	-0.0274	0.2524	0.2317
1227	Atp-dependent chaperone protein (Fragment) OS=Nannochloropsis gaditana GN=Naga_101345g2 PE=4 SV=1	W7TKL8_9STRA	Naga_101345g2	14 kDa	4	0.55	0.0037	13.53	13.37	13.54	13.39	14.15	13.96	13.84	13.97	0.1081	-0.0782	0.049	-0.0647	0.7105	0.5154	0.4112	0.4951
1228	Bromodomain containing protein OS=Nannochloropsis gaditana (strain CCMP526) GN=NGA_0194301 PE=4 SV=1	K8YTX3_NANGC (+1)	NGA_0194301	25 kDa	8	0.22	0.0037	15.12	14.79	14.93	14.95	15.28	15.16	15.16	15.04	0.1632	-0.1551	-0.0179	0.0041	0.3335	0.2173	0.215	0.0899
1229	Protein translocase subunit SecA OS=Nannochloropsis gaditana GN=secA PE=3 SV=1	K9ZV01_9STRA (+1)	secA	100 kDa	15	0.13	0.0038	15.7	15.69	15.75	15.81	15.86	15.74	15.95	15.92	-0.0641	-0.0441	0.0047	0.0725	0.1184	0.0061	0.2024	0.1832
1230	Uncharacterized protein OS=Nannochloropsis gaditana GN=Naga_101462g2 PE=4 SV=1	W7TBY0_9STRA	Naga_101462g2	11 kDa	14	0.2	0.0039	16.46	16.63	16.44	16.38	16.81	16.69	16.68	16.52	-0.0504	0.1489	-0.0463	-0.1098	0.3277	0.21	0.2047	0.026
1231	Uncharacterized protein OS=Nannochloropsis gaditana GN=Naga_102571g1 PE=4 SV=1	W7TLX1_9STRA	Naga_102571g1	13 kDa	2	0.32	0.0039	16.55	16.54	16.56	16.55	16.93	16.68	16.99	16.85	-0.0016	-0.0092	0.0122	-0.004	0.374	0.1315	0.4424	0.2979
1232	ATPase, F0 complex, subunit B, mitochondrial OS=Nannochloropsis gaditana GN=Naga_100016g59 PE=4 SV=1	W7TNT0_9STRA	Naga_100016g59	40 kDa	60	0.08	0.004	16.68	16.48	16.6	16.51	16.69	16.56	16.74	16.56	0.1261	-0.0873	0.0377	-0.0564	0.1285	-0.0038	0.1868	-0.0001
1233	Isoleucyl-trna synthetase OS=Nannochloropsis gaditana GN=Naga_100007g121 PE=3 SV=1	W7TPS8_9STRA	Naga_100007g121	121 kDa	40	-0.21	0.004	16.34	16.44	16.4	16.37	16.12	16.19	16.13	16.26	-0.0727	0.0552	0.0186	-0.0191	-0.2638	-0.1903	-0.2498	-0.119
1234	Uncharacterized protein OS=Nannochloropsis gaditana GN=Naga_100958g1 PE=4 SV=1	W7TPW2_9STRA	Naga_100958g1	41 kDa	42	-0.1	0.004	17.12	16.69	17.05	17.24	17.01	16.56	17.02	17.05	0.0888	-0.3563	0.009	0.1999	-0.0347	-0.485	-0.0201	0.011
1235	20S proteasome subunit alpha 2 OS=Nannochloropsis gaditana (strain CCMP526) GN=NGATSA_3026600 PE=2 SV=1	I2CRF8_NANGC (+1)	NGATSA_3026600	26 kDa	19	0.18	0.004	15.91	15.85	15.89	15.77	16.08	16.09	15.91	16.03	0.0623	0.01	0.0607	-0.0849	0.2359	0.2545	0.0596	0.1942
1236	Beta-ketoacyl-CoA thiolase OS=Nannochloropsis gaditana (strain CCMP526) GN=KCT1 PE=3 SV=1	K8YTR0_NANGC	KCT1	44 kDa	14	-0.15	0.004	16.58	16.42	16.56	16.51	16.4	16.39	16.32	16.35	0.0713	-0.1046	0.045	-0.0177	-0.0986	-0.145	-0.1938	-0.175
1237	Putative fkbp-type peptidyl-prolyl cis-trans isomerase chloroplastic-like protein OS=Nannochloropsis gaditana GN=Naga_100033g36 PE=4 SV=1	W7TWV9_9STRA	Naga_100033g36	24 kDa	14	0.2	0.004	17.14	17.24	17.1	17.11	17.37	17.34	17.34	17.32	0.0085	0.0905	-0.0498	-0.0433	0.2167	0.1778	0.1874	0.1751
1238	Uncharacterized protein OS=Nannochloropsis gaditana GN=Naga_100014g57 PE=4 SV=1	W7TGL0_9STRA	Naga_100014g57	48 kDa	10	0.18	0.004	15.76	15.71	15.73	15.82	16.05	15.87	15.97	15.84	0.0027	-0.0491	-0.0289	0.0605	0.2842	0.1021	0.2065	0.0781
1239	Eukaryotic translation initiation factor 3 subunit F OS=Nannochloropsis gaditana GN=EIF3f PE=3 SV=1	W7TVE8_9STRA	EIF3f	34 kDa	11	0.23	0.004	15.06	14.79	15.05	14.96	15.21	15.09	15.21	15.29	0.1086	-0.1778	0.0839	-0.0178	0.2645	0.1273	0.2393	0.3274
1240	Nicotinamide nucleotide transhydrogenase OS=Nannochloropsis gaditana GN=Naga_100013g72 PE=4 SV=1	W7U3Y9_9STRA	Naga_100013g72	81 kDa	9	-0.23	0.004	16.39	16.22	16.21	16.22	15.96	16.09	16.14	15.96	0.136	-0.0406	-0.0466	-0.0392	-0.2943	-0.1664	-0.1092	-0.2999
1241	Uncharacterized protein OS=Nannochloropsis gaditana GN=Naga_100020g68 PE=4 SV=1	W7TAZ9_9STRA	Naga_100020g68	36 kDa	6	0.21	0.004	15.9	15.67	15.71	15.64	16.17	15.82	15.95	15.83	0.158	-0.0691	-0.0135	-0.0991	0.4482	0.1015	0.2226	0.105
1242	Pci domain-containing protein 2 OS=Nannochloropsis gaditana GN=Naga_100001g73 PE=4 SV=1	W7TST0_9STRA	Naga_100001g73	50 kDa	6	0.22	0.004	16.19	16.23	16.15	16.16	16.37	16.5	16.39	16.36	0.0106	0.0491	-0.0283	-0.0185	0.1841	0.3024	0.207	0.175
1243	Nuclear transport OS=Nannochloropsis gaditana GN=Naga_100010g44 PE=4 SV=1	W7TM77_9STRA	Naga_100010g44	13 kDa	6	0.29	0.004	16.18	15.76	15.79	15.66	16.21	16.09	16.15	15.94	0.3767	-0.043	-0.0172	-0.1385	0.4162	0.303	0.3423	0.139
1244	Uncharacterized protein OS=Nannochloropsis gaditana (strain CCMP526) GN=NGATSA_3051600 PE=2 SV=1	I2CSD8_NANGC	NGATSA_3051600	35 kDa	6	0.18	0.004	16.4	16.31	16.26	16.21	16.47	16.48	16.48	16.47	0.1061	0.0186	-0.0364	-0.0991	0.1737	0.1956	0.1782	0.177
1245	Uncharacterized protein (Fragment) OS=Nannochloropsis gaditana (strain CCMP526) GN=NGATSA_3015200 PE=2 SV=1	I2CPS8_NANGC	NGATSA_3015200	26 kDa	6	0.2	0.004	16.84	16.75	16.87	16.75	17.13	16.78	16.98	17.11	0.0416	-0.0561	0.0665	-0.052	0.3291	-0.0197	0.1796	0.2993
1246	Uncharacterized protein OS=Nannochloropsis gaditana GN=Naga_100636g3 PE=4 SV=1	W7U6N8_9STRA	Naga_100636g3	60 kDa	4	0.37	0.004	14.21	14.27	14.54	14.33	14.61	14.69	14.75	14.74	-0.1169	-0.0536	0.1971	0.0423	0.2687	0.3729	0.4116	0.4161
1247	DNA-directed RNA polymerase subunit beta OS=Nannochloropsis gaditana GN=Naga_100052g16 PE=3 SV=1	W7TET2_9STRA	Naga_100052g16	135 kDa	4	0.29	0.004	13.35	13.65	13.67	13.86	13.84	13.94	13.82	14.21	-0.2887	0.0097	0.0327	0.2192	0.187	0.2763	0.1673	0.5606
1248	Pseudouridine synthase and archaeosine transglycosylase domain-containing protein OS=Nannochloropsis gaditana GN=Naga_100182g4 PE=4 SV=1	W7TYT1_9STRA	Naga_100182g4	34 kDa	4	0.26	0.004	16.57	16.48	16.6	16.38	16.92	16.78	16.75	16.5	0.0556	-0.0366	0.102	-0.1326	0.4175	0.2746	0.2442	-0.0012
1249	Plastid lipid-associated protein/fibrillin conserved domain protein (Fragment) OS=Nannochloropsis gaditana GN=Naga_101253g1 PE=4 SV=1	W7TJU4_9STRA	Naga_101253g1	20 kDa	4	0.31	0.004	16.21	16.28	16.15	16.15	16.42	16.56	16.42	16.59	0.0163	0.0849	-0.0486	-0.0433	0.2372	0.3492	0.2263	0.3954
1250	Unusual protein kinase OS=Nannochloropsis gaditana GN=Naga_100018g5 PE=4 SV=1	W7U1Q9_9STRA	Naga_100018g5	117 kDa	3	0.27	0.004	16.27	16.02	16.24	16.15	16.65	16.34	16.53	16.4	0.0845	-0.1753	0.0582	-0.0369	0.4471	0.1622	0.3632	0.2195
1251	Diacylglycerol acyltransferase family protein OS=Nannochloropsis gaditana GN=Naga_100006g86 PE=4 SV=1	W7U9S5_9STRA	Naga_100006g86	45 kDa	3	0.3	0.004	15.42	15.57	15.58	15.49	15.72	15.81	15.85	15.92	-0.1385	0.0261	0.0613	-0.0159	0.1939	0.2847	0.3283	0.3985
1252	Vacuolar protein sorting-associated (Fragment) OS=Nannochloropsis gaditana (strain CCMP526) GN=NGATSA_3055400 PE=2 SV=1	I2CSF3_NANGC	NGATSA_3055400	8 kDa	3	0.3	0.004	16.71	16.88	16.98	17.01	17.11	17.1	17.3	17.27	-0.1894	-0.0222	0.0734	0.1157	0.2197	0.1949	0.4002	0.369
1253	Tbp-associated factor 15b OS=Nannochloropsis gaditana GN=Naga_100046g27 PE=4 SV=1	W7U2M3_9STRA	Naga_100046g27	25 kDa	3	0.54	0.004	15.93	15.57	15.9	15.7	16.49	16.44	16.29	16.07	0.123	-0.2391	0.1026	-0.0922	0.6943	0.644	0.4947	0.2757
1254	Abc transporter related protein OS=Nannochloropsis gaditana GN=Naga_100105g3 PE=4 SV=1	W7TDG8_9STRA	Naga_100105g3	74 kDa	3	0.62	0.004	14.52	15.1	15.11	15.11	15.5	15.59	15.37	15.73	-0.4547	0.1066	0.1531	0.2033	0.5301	0.672	0.4202	0.7716
1255	Uncharacterized protein OS=Nannochloropsis gaditana (strain CCMP526) GN=NGA_0453300 PE=4 SV=1	K8YY60_NANGC (+1)	NGA_0453300	39 kDa	3	0.29	0.004	15.56	15.91	15.96	15.88	16.18	16.05	16.04	16.19	-0.2735	0.0743	0.1278	0.0467	0.354	0.23	0.1974	0.3605
1256	Cystathionine beta-synthase OS=Nannochloropsis gaditana GN=Naga_100014g14 PE=3 SV=1	W7TGG0_9STRA	Naga_100014g14	63 kDa	3	0.45	0.004	13.42	13.62	13.57	13.52	13.87	13.77	14.04	14.2	-0.1152	0.0834	0.0372	-0.0109	0.3476	0.252	0.4962	0.6577
1257	3-oxoacid-b subunit OS=Nannochloropsis gaditana (strain CCMP526) GN=NGA_0557400 PE=4 SV=1	K8Z440_NANGC	NGA_0557400	7 kDa	2	0.29	0.004	14.7	14.8	14.76	14.85	15.12	14.95	15.11	15.09	-0.0815	0.0244	-0.0152	0.0686	0.3397	0.1727	0.332	0.312
1258	Uncharacterized protein OS=Nannochloropsis gaditana GN=Naga_101490g1 PE=4 SV=1	W7TJ92_9STRA	Naga_101490g1	8 kDa	2	0.38	0.004	15.77	15.71	15.29	15.81	16.03	15.86	16.42	15.98	0.1086	0.0378	-0.3728	0.1397	0.3659	0.1883	0.7552	0.3173
1259	Chlorophyll synthetase (Fragment) OS=Nannochloropsis gaditana GN=CHS PE=4 SV=1	W7TWB4_9STRA	CHS	21 kDa	2	0.2	0.004	16.58	16.65	16.65	16.58	16.69	16.76	16.99	16.79	-0.0371	0.034	0.0327	-0.0347	0.0738	0.1517	0.375	0.1728
1260	Myotubularin-related protein 2 OS=Nannochloropsis gaditana GN=CSTF64 PE=3 SV=1	W7TSB4_9STRA	CSTF64	109 kDa	2	0.74	0.004	16.42	16.92	16.69	16.64	17.32	17.62	17.33	17.4	-0.2439	0.2504	0.0261	-0.0161	0.6546	0.9374	0.6614	0.7367
1261	Nadh dehydrogenase OS=Nannochloropsis gaditana GN=Naga_100003g74 PE=4 SV=1	W7UB87_9STRA	Naga_100003g74	31 kDa	19	0.19	0.0041	16.94	16.87	16.89	16.84	17.04	16.98	17.19	17.07	0.0481	-0.0095	0.0101	-0.0415	0.128	0.0975	0.2836	0.1824
1262	Peptidyl-prolyl cis-trans isomerase OS=Nannochloropsis gaditana (strain CCMP526) GN=PPIH PE=3 SV=1	K8YRK9_NANGC	PPIH	20 kDa	5	0.36	0.0042	15.77	15.9	15.79	15.72	16.03	16.23	16.2	16.16	-0.0339	0.12	0.01	-0.0693	0.2014	0.477	0.3852	0.3623
1263	Uncharacterized protein OS=Nannochloropsis gaditana GN=Naga_100174g10 PE=4 SV=1	W7TVF6_9STRA	Naga_100174g10	35 kDa	5	-0.17	0.0046	15.47	15.39	15.53	15.5	15.21	15.37	15.28	15.34	-0.0061	-0.0826	0.0539	0.0271	-0.251	-0.1007	-0.2297	-0.1264
1264	Uncharacterized protein OS=Nannochloropsis gaditana GN=Naga_100030g33 PE=4 SV=1	W7TJF2_9STRA	Naga_100030g33	129 kDa	5	0.25	0.0046	15.98	15.87	16.14	16.18	16.05	16.1	16.59	16.49	-0.0722	-0.1774	0.0924	0.1313	0.0143	0.0371	0.5481	0.4469
1265	Serine palmitoyltransferase OS=Nannochloropsis gaditana GN=Naga_100065g6 PE=3 SV=1	W7T5H4_9STRA	Naga_100065g6	71 kDa	10	0.19	0.0049	15.59	15.69	15.88	15.74	15.87	15.86	15.96	16.02	-0.1438	-0.0616	0.1347	-0.0124	0.141	0.0971	0.2226	0.2585
1266	Cluster of Uncharacterized protein OS=Nannochloropsis gaditana GN=Naga_100377g3 PE=4 SV=1 (W7TQ32_9STRA)	W7TQ32_9STRA [2]	Naga_100377g3	23 kDa	48	0.44	0.005	16.87	16.91	16.78	16.84	17.57	17.3	17.15	17.06	0.0855	0.0617	-0.1271	-0.0077	0.6359	0.3969	0.3067	0.1594
1267	Glycine-rich rna-binding protein 4 OS=Nannochloropsis gaditana (strain CCMP526) GN=NGA_0504200 PE=4 SV=1	K8YVY4_NANGC (+1)	NGA_0504200	19 kDa	28	0.15	0.005	16.31	16.19	16.21	16.19	16.42	16.36	16.35	16.32	0.0834	-0.0313	-0.0014	-0.0314	0.2016	0.1441	0.1293	0.1015
1268	Uncharacterized protein OS=Nannochloropsis gaditana GN=Naga_100003g139 PE=4 SV=1	W7U388_9STRA	Naga_100003g139	58 kDa	28	-0.08	0.005	16.2	16.04	16.1	16.03	16.09	15.94	16	15.95	0.1019	-0.0431	0.0118	-0.0619	0.007	-0.1373	-0.0957	-0.1605
1269	Ap-2 complex subunit OS=Nannochloropsis gaditana GN=Naga_100068g26 PE=4 SV=1	W7TFV9_9STRA	Naga_100068g26	116 kDa	20	0.18	0.005	15.89	15.9	15.94	15.91	16.1	16.08	16.11	16.05	-0.0196	-0.0077	0.0302	0.0051	0.1859	0.1665	0.1989	0.1292
1270	Uncharacterized protein OS=Nannochloropsis gaditana (strain CCMP526) GN=NGA_0623000 PE=4 SV=1	K8Z4R1_NANGC (+1)	NGA_0623000	66 kDa	16	-0.21	0.005	16.74	16.78	16.62	16.68	16.55	16.57	16.38	16.5	0.0415	0.0921	-0.1065	-0.0136	-0.153	-0.1453	-0.3209	-0.201
1271	Endoglucanase OS=Nannochloropsis gaditana GN=Naga_100014g5 PE=3 SV=1	W7TJB6_9STRA	Naga_100014g5	53 kDa	12	0.16	0.005	16.2	16.06	16.22	16.32	16.4	16.07	16.47	16.6	-0.0045	-0.1433	0.0254	0.1161	0.191	-0.1276	0.2629	0.4031
1272	Coatomer copii OS=Nannochloropsis gaditana GN=Naga_100037g10 PE=4 SV=1	W7TF62_9STRA	Naga_100037g10	98 kDa	11	0.26	0.005	15.35	15.51	15.63	15.7	15.73	15.59	15.99	15.89	-0.2106	-0.0499	0.0691	0.1498	0.1658	0.0326	0.4356	0.3321
1273	Aspartyl-trna synthetase OS=Nannochloropsis gaditana GN=Naga_100047g38 PE=4 SV=1	W7TVH3_9STRA	Naga_100047g38	67 kDa	10	0.18	0.005	15.99	15.87	15.95	15.97	16.09	16.05	16.19	16.15	0.0412	-0.0808	0.003	0.0264	0.1354	0.0969	0.2469	0.203
1274	Nli interacting factor family protein OS=Nannochloropsis gaditana (strain CCMP526) GN=NGA_0185210 PE=4 SV=1	K8YVK0_NANGC (+1)	NGA_0185210	42 kDa	6	0.34	0.005	17.23	17.32	17.32	17.3	17.74	17.53	17.68	17.61	-0.0604	0.0471	0.0396	0.0314	0.4332	0.2426	0.3838	0.2915
1275	Ddb1 and cul4-associated factor 7 OS=Nannochloropsis gaditana GN=Naga_100004g117 PE=4 SV=1	W7TXK4_9STRA	Naga_100004g117	44 kDa	7	0.14	0.005	15.06	15.2	15.15	15.38	15.21	15.26	15.47	15.44	-0.1319	0.0068	-0.0464	0.1896	0.0087	0.07	0.2757	0.245
1276	Uncharacterized protein OS=Nannochloropsis gaditana GN=Naga_100740g1 PE=4 SV=1	W7T7Q5_9STRA (+1)	Naga_100740g1	16 kDa	7	0.29	0.005	15.68	15.79	15.71	15.75	16.03	15.91	16.11	16.05	-0.0613	0.0582	-0.0304	0.0204	0.2774	0.1756	0.3738	0.2862
1277	Chromatin modifying protein 5 OS=Nannochloropsis gaditana GN=Naga_100381g2 PE=3 SV=1	W7TMW4_9STRA	Naga_100381g2	26 kDa	7	0.3	0.005	14.81	14.89	14.84	14.91	14.88	15.16	15.41	15.23	-0.0798	0.021	-0.0189	0.0343	-0.0171	0.3233	0.5596	0.4031
1278	Polyphosphoinositide binding protein ssh2 OS=Nannochloropsis gaditana GN=Naga_100080g21 PE=4 SV=1	W7U340_9STRA	Naga_100080g21	35 kDa	7	-0.16	0.005	15.38	15.23	15.39	15.35	15.2	15.12	15.18	15.22	0.0465	-0.1089	0.0442	0.0105	-0.1326	-0.2221	-0.1568	-0.1103
1279	Golgi snap receptor complex member 2 OS=Nannochloropsis gaditana GN=SNR20 PE=4 SV=1	W7U6N0_9STRA	SNR20	24 kDa	6	0.21	0.005	15.81	15.89	15.84	15.9	15.96	16.09	16.16	16.1	-0.0253	0.0229	-0.0237	0.0403	0.089	0.2258	0.2907	0.2395
1280	24-sterol c-methyltransferase OS=Nannochloropsis gaditana GN=SMT2 PE=4 SV=1	W7TVT7_9STRA	SMT2	62 kDa	6	0.14	0.005	14.77	14.84	14.87	14.93	15.04	14.87	14.98	15.05	-0.0883	-0.0097	0.0163	0.0696	0.1908	0.021	0.1305	0.1906
1281	Peptide methionine sulfoxide reductase OS=Nannochloropsis gaditana (strain CCMP526) GN=NGA_0248301 PE=3 SV=1	K8Z531_NANGC (+1)	NGA_0248301	22 kDa	6	0.24	0.005	14.47	14.69	14.69	14.68	14.97	14.96	14.71	14.85	-0.1612	0.057	0.0542	0.0494	0.3369	0.3291	0.0675	0.2095
1282	Golgi apparatus membrane protein TVP15 OS=Nannochloropsis gaditana GN=Naga_100190g3 PE=4 SV=1	W7TYB2_9STRA	Naga_100190g3	34 kDa	5	0.24	0.005	14.55	14.65	14.73	14.76	14.94	14.69	15.08	14.9	-0.1232	-0.0212	0.0596	0.0874	0.2686	0.0192	0.4103	0.2268
1283	Nucleoredoxin-like protein 2 OS=Nannochloropsis gaditana (strain CCMP526) GN=NGA_0075900 PE=4 SV=1	K8YQY0_NANGC (+1)	NGA_0075900	27 kDa	5	0.25	0.005	16.13	16.11	15.89	15.86	16.16	16.39	16.18	16.2	0.1239	0.1313	-0.0979	-0.1195	0.1792	0.4023	0.202	0.2308
1284	Cellulase 2 OS=Nannochloropsis gaditana GN=Naga_100103g7 PE=3 SV=1	W7TTM1_9STRA	Naga_100103g7	50 kDa	5	0.33	0.005	16	16.02	16.27	16.19	16.42	16.28	16.36	16.61	-0.1303	-0.1138	0.1474	0.0759	0.2983	0.1617	0.2441	0.4889
1285	Uncharacterized protein OS=Nannochloropsis gaditana GN=Naga_100002g138 PE=4 SV=1	W7U7F2_9STRA	Naga_100002g138	21 kDa	4	0.29	0.005	13.36	13.31	13.5	13.41	13.63	13.69	13.8	13.63	-0.0446	-0.0886	0.1036	0.0253	0.2322	0.3163	0.412	0.2572
1286	Omega-6 fatty acid desaturase delta-12 OS=Nannochloropsis gaditana (strain CCMP526) GN=DES PE=4 SV=1	K8YR13_NANGC (+1)	DES	51 kDa	3	-0.37	0.005	16.2	16.29	16.31	16.41	16.07	15.67	16.07	15.82	-0.1045	-0.04	0.0066	0.1014	-0.2461	-0.6127	-0.2443	-0.4424
1287	Eukaryotic translation initiation factor 5 OS=Nannochloropsis gaditana GN=Naga_100008g39 PE=4 SV=1	W7U5E6_9STRA	Naga_100008g39	50 kDa	2	0.54	0.005	16.15	16.35	16.38	16.17	16.95	16.53	17.2	16.57	-0.1234	0.0819	0.1122	-0.0987	0.6776	0.2618	0.9302	0.3013
1288	Uncharacterized protein OS=Nannochloropsis gaditana (strain CCMP526) GN=NGA_0014902 PE=4 SV=1	K8YTC5_NANGC (+1)	NGA_0014902	20 kDa	3	-0.28	0.005	15.62	15.63	15.63	15.52	15.34	15.27	15.27	15.37	0.0273	0.0315	0.0425	-0.0791	-0.2658	-0.3232	-0.3314	-0.2245
1289	Uncharacterized protein (Fragment) OS=Nannochloropsis gaditana GN=Naga_100083g1 PE=4 SV=1	W7U101_9STRA	Naga_100083g1	25 kDa	3	0.46	0.005	13.74	14.06	13.83	13.92	14.24	14.18	14.38	14.49	-0.147	0.1626	-0.0534	0.0344	0.3607	0.3331	0.4962	0.6106
1290	Glycoside hydrolase 15-like protein OS=Nannochloropsis gaditana GN=Naga_101101g2 PE=4 SV=1	W7TRS5_9STRA	Naga_101101g2	37 kDa	2	0.23	0.005	14.81	14.88	14.99	14.91	15.03	15.24	15.09	15.2	-0.087	-0.0144	0.0855	0.0132	0.1352	0.34	0.1981	0.2976
1291	Uncharacterized protein OS=Nannochloropsis gaditana GN=Naga_100046g25 PE=4 SV=1	W7TUC7_9STRA	Naga_100046g25	69 kDa	2	0.36	0.005	15.46	15.33	15.4	15.42	15.76	15.93	15.58	15.73	0.0552	-0.0762	-0.0067	0.0122	0.3552	0.5236	0.1755	0.3204
1292	Vacuolar protein sorting-associated protein 29 (Fragment) OS=Nannochloropsis gaditana (strain CCMP526) GN=NGA_0451800 PE=3 SV=1	K8YX76_NANGC (+1)	NGA_0451800	17 kDa	2	0.29	0.005	18.27	18.01	18.1	18.12	18.49	18.24	18.51	18.44	0.1397	-0.1133	-0.0217	-0.0033	0.3618	0.1099	0.3836	0.3117
1293	Di-n-acetylchitobiase OS=Nannochloropsis gaditana (strain CCMP526) GN=NGA_0495700 PE=4 SV=1	K8YVD1_NANGC (+1)	NGA_0495700	48 kDa	2	0.26	0.005	15.19	15.38	15.1	15.22	15.49	15.39	15.55	15.51	-0.0356	0.1504	-0.1289	-0.0078	0.2611	0.1638	0.3277	0.2861
1294	Isobutyryl-mitochondrial OS=Nannochloropsis gaditana GN=Naga_100096g20 PE=3 SV=1	W7U300_9STRA	Naga_100096g20	47 kDa	2	0.51	0.005	15.43	15.35	15.42	15.24	15.68	15.99	15.84	15.89	0.0636	-0.016	0.0633	-0.1253	0.3091	0.6262	0.4677	0.5248
1295	Uncharacterized protein OS=Nannochloropsis gaditana (strain CCMP526) GN=NGA_0429500 PE=4 SV=1	K8ZAL4_NANGC (+1)	NGA_0429500	26 kDa	2	0.37	0.005	16.97	16.89	16.8	16.84	17.51	17.41	17.31	16.9	0.0952	0.0092	-0.0723	-0.0363	0.6393	0.5301	0.4294	0.027
1296	Transcription corepressor (Fragment) OS=Nannochloropsis gaditana (strain CCMP526) GN=NGATSA_3026500 PE=2 SV=1	I2CPP7_NANGC	NGATSA_3026500	25 kDa	2	0.53	0.005	14.23	14.35	14.37	14.58	14.76	14.74	14.95	15.04	-0.1526	-0.0291	-0.0143	0.194	0.3773	0.3674	0.571	0.6589
1297	Pyridoxal phosphate-dependent enzyme, beta subunit (Fragment) OS=Nannochloropsis gaditana GN=Naga_100586g1 PE=4 SV=1	W7T7K3_9STRA	Naga_100586g1	17 kDa	2	0.32	0.005	16.69	16.7	16.55	16.59	16.97	16.86	16.89	17.09	0.0583	0.0703	-0.0837	-0.0354	0.3463	0.2283	0.2527	0.4556
1298	Fusca protein fus6 OS=Nannochloropsis gaditana GN=Naga_100036g40 PE=4 SV=1	W7TPY2_9STRA (+1)	Naga_100036g40	60 kDa	8	0.24	0.0051	15.13	15.56	15.7	15.6	15.59	15.87	15.56	15.95	-0.3867	0.0508	0.1802	0.0914	0.0828	0.3721	0.0432	0.4449
1299	Glutamine amidotransferase OS=Nannochloropsis gaditana (strain CCMP526) GN=PDXT PE=3 SV=1	K8YT50_NANGC	PDXT	31 kDa	7	0.11	0.0053	14.93	15.07	15.04	15.11	15.23	15.12	15.16	15.06	-0.1153	0.0316	0.0013	0.0731	0.1903	0.083	0.1258	0.0134
1300	Fe-s oxidoreductase OS=Nannochloropsis gaditana GN=Naga_100112g5 PE=4 SV=1	W7U1I5_9STRA	Naga_100112g5	49 kDa	5	0.22	0.0054	16.82	16.74	16.86	16.83	17.06	16.91	17.03	17.12	0.0026	-0.0738	0.0461	0.0193	0.2629	0.1057	0.2233	0.3159
1301	Selenium binding protein OS=Nannochloropsis gaditana GN=Naga_100114g7 PE=4 SV=1	W7U1L8_9STRA	Naga_100114g7	23 kDa	20	0.12	0.0056	17.63	17.33	17.64	17.67	17.78	17.52	17.85	17.61	0.0593	-0.2421	0.0611	0.0868	0.2033	-0.0575	0.2746	0.0241
1302	Methyltransferase type 11 OS=Nannochloropsis gaditana GN=Naga_100810g2 PE=4 SV=1	W7TU53_9STRA	Naga_100810g2	32 kDa	12	0.21	0.0056	15.48	15.59	15.67	15.56	15.8	15.78	15.73	15.82	-0.1003	-0.0119	0.0971	-0.0094	0.2456	0.1787	0.1622	0.2745
1303	D-isomer specific 2-hydroxyacid dehydrogenase OS=Nannochloropsis gaditana (strain CCMP526) GN=NGATSA_3009100 PE=2 SV=1	I2CQU9_NANGC	NGATSA_3009100	45 kDa	10	0.15	0.0059	15.24	15.46	15.37	15.39	15.36	15.61	15.58	15.54	-0.1418	0.0868	-0.0032	0.0145	-0.0303	0.242	0.2098	0.1628
1304	Translation initiation factor 5B (Fragment) OS=Nannochloropsis gaditana (strain CCMP526) GN=NGATSA_3057300 PE=2 SV=1	I2CSG6_NANGC	NGATSA_3057300	109 kDa	23	0.08	0.006	15.88	15.83	15.94	15.94	15.99	15.92	16.03	15.96	-0.0158	-0.0707	0.0445	0.0337	0.0926	0.0245	0.1313	0.0669
1305	Histidinol dehydrogenase OS=Nannochloropsis gaditana GN=HDH PE=3 SV=1	W7U5L5_9STRA	HDH	45 kDa	20	0.1	0.006	16.13	16.14	16.06	16.02	16.1	16.22	16.22	16.2	0.0372	0.0443	-0.0309	-0.0755	0.0289	0.1381	0.1404	0.1115
1306	Tripeptidyl-peptidase 2 OS=Nannochloropsis gaditana GN=Naga_100004g44 PE=4 SV=1	W7U6E9_9STRA	Naga_100004g44	82 kDa	13	-0.2	0.006	15.56	15.4	15.47	15.45	15.3	15.25	15.26	15.23	0.0884	-0.0745	-0.014	-0.0137	-0.1605	-0.215	-0.2074	-0.2544
1307	Na+/H+ antiporter OS=Nannochloropsis gaditana GN=Naga_100001g132 PE=4 SV=1	W7TI41_9STRA	Naga_100001g132	79 kDa	12	0.13	0.006	14.92	14.97	15.05	15.06	15.22	15.12	15.08	15.09	-0.0864	-0.0213	0.048	0.063	0.2222	0.1043	0.0796	0.105
1308	Histidyl-trna synthetase OS=Nannochloropsis gaditana GN=Naga_100046g1 PE=3 SV=1	W7TU86_9STRA (+1)	Naga_100046g1	61 kDa	11	-0.23	0.006	16.01	15.75	15.91	15.9	15.76	15.64	15.67	15.55	0.1182	-0.1546	0.0376	0.0099	-0.1404	-0.2414	-0.1906	-0.335
1309	Beta--endoglucanase OS=Nannochloropsis gaditana (strain CCMP526) GN=NGA_0630900 PE=3 SV=1	K8YS93_NANGC (+1)	NGA_0630900	53 kDa	8	0.2	0.006	16.1	15.71	15.96	15.94	16.37	15.9	16	16.23	0.1648	-0.2409	0.018	0.0014	0.4293	-0.0224	0.0836	0.294
1310	Paired amphipathic helix protein sin3b OS=Nannochloropsis gaditana GN=Naga_100390g3 PE=4 SV=1	W7TD50_9STRA (+1)	Naga_100390g3	127 kDa	7	0.24	0.006	13.66	13.74	13.88	13.85	13.83	14.04	14.21	14.04	-0.1272	-0.077	0.0907	0.0687	0.0336	0.2663	0.4213	0.2687
1311	Stearoyl-desaturase 5 OS=Nannochloropsis gaditana GN=Naga_100027g27 PE=3 SV=1	W7TAD9_9STRA	Naga_100027g27	39 kDa	7	-0.19	0.006	15.28	15.41	15.48	15.29	15.17	15.22	15.27	15.01	-0.0681	0.0333	0.1036	-0.0894	-0.2104	-0.1623	-0.1147	-0.3465
1312	Uncharacterized protein OS=Nannochloropsis gaditana (strain CCMP526) GN=NGA_0310502 PE=4 SV=1	K8YZH7_NANGC (+1)	NGA_0310502	35 kDa	6	-0.27	0.006	16.81	16.78	16.64	16.51	16.44	16.48	16.41	16.33	0.1201	0.094	-0.0417	-0.1748	-0.2139	-0.2333	-0.2672	-0.3438
1313	Iron-sulfur cluster scaffold protein nfu-like protein OS=Nannochloropsis gaditana GN=Naga_100026g38 PE=4 SV=1	W7UC73_9STRA	Naga_100026g38	33 kDa	6	0.36	0.006	15.36	15.21	15.01	15.17	15.8	15.51	15.44	15.42	0.1922	0.0198	-0.1964	-0.0175	0.6111	0.3184	0.2529	0.2227
1314	Glutamyl-tRNA reductase OS=Nannochloropsis gaditana GN=Naga_100125g4 PE=3 SV=1	W7U4L8_9STRA	Naga_100125g4	70 kDa	6	-0.39	0.006	16.09	15.86	15.97	15.96	15.64	15.68	15.37	15.67	0.1276	-0.1278	-0.0004	-0.0134	-0.3308	-0.3263	-0.5965	-0.3697
1315	Pentatricopeptide repeat containing protein OS=Nannochloropsis gaditana GN=Naga_100017g88 PE=4 SV=1	W7U1Y0_9STRA	Naga_100017g88	120 kDa	5	-0.17	0.006	16.52	16.35	16.45	16.48	16.2	16.21	16.4	16.3	0.0731	-0.0979	0.0019	0.0302	-0.2422	-0.2456	-0.0613	-0.1419
1316	Lamin-b receptor OS=Nannochloropsis gaditana GN=Naga_100010g9 PE=4 SV=1	W7TUH8_9STRA	Naga_100010g9	72 kDa	3	0.29	0.006	15.07	14.98	15.18	15.11	15.2	15.35	15.55	15.36	-0.0253	-0.111	0.0966	0.0133	0.1189	0.2323	0.4619	0.3017
1317	Phosphatidylinositol-4-phosphate 5-kinase OS=Nannochloropsis gaditana GN=Naga_100017g60 PE=4 SV=1	W7TRB8_9STRA	Naga_100017g60	120 kDa	3	0.33	0.006	14.34	14.33	14.74	14.68	14.83	15.06	14.88	14.74	-0.2849	-0.3334	0.1525	0.0908	0.2537	0.4783	0.3727	0.1296
1318	Aldehyde dehydrogenase OS=Nannochloropsis gaditana GN=Naga_100963g2 PE=4 SV=1	W7TAN7_9STRA	Naga_100963g2	15 kDa	3	0.34	0.006	14.2	14.82	14.3	14.5	14.73	14.93	14.91	14.66	-0.2796	0.3457	-0.2318	0.0257	0.2498	0.448	0.4391	0.1816
1319	Gtp-binding protein parf OS=Nannochloropsis gaditana GN=Naga_100055g4 PE=4 SV=1	W7TWE0_9STRA	Naga_100055g4	78 kDa	3	0.32	0.006	14.56	14.89	15.02	15.2	15.18	15.21	15.14	15.53	-0.3865	-0.078	0.0834	0.2767	0.2508	0.2819	0.2081	0.6647
1320	Myb dna binding protein transcription factor-like protein OS=Nannochloropsis gaditana GN=Naga_100006g44 PE=4 SV=1	W7U9U2_9STRA	Naga_100006g44	28 kDa	2	0.44	0.006	15.07	15.03	15.38	15.32	15.56	15.59	15.57	16.03	-0.1386	-0.1838	0.1699	0.1093	0.355	0.3778	0.35	0.8091
1321	Tim10-like protein OS=Nannochloropsis gaditana GN=Tim10 PE=3 SV=1	W7T541_9STRA	Tim10	11 kDa	3	0.42	0.006	15.64	15.73	15.9	15.84	16.35	16.35	15.95	16.1	-0.1819	-0.0675	0.0976	0.0489	0.5499	0.5557	0.1696	0.2998
1322	Riboflavin kinase OS=Nannochloropsis gaditana (strain CCMP526) GN=RFK PE=4 SV=1	K8Z7U3_NANGC	RFK	58 kDa	2	-0.6	0.006	14.88	14.78	14.46	14.71	14.25	14.45	14.16	13.52	0.1675	0.0712	-0.2479	-0.0033	-0.4766	-0.2603	-0.5436	-1.1825
1323	Uncharacterized protein OS=Nannochloropsis gaditana GN=Naga_100802g1 PE=4 SV=1	W7TV62_9STRA	Naga_100802g1	13 kDa	2	-0.34	0.006	15.94	15.83	15.84	15.83	15.64	15.37	15.73	15.4	0.084	-0.038	-0.0237	-0.0328	-0.2253	-0.491	-0.1255	-0.4627
1324	Exoribonuclease, phosphorolytic domain 1 OS=Nannochloropsis gaditana GN=Naga_100349g4 PE=4 SV=1	W7TGY6_9STRA (+1)	Naga_100349g4	36 kDa	2	0.41	0.006	15.71	15.54	15.71	15.57	16.1	15.97	15.98	16.08	0.0888	-0.0796	0.093	-0.046	0.4875	0.3522	0.3627	0.464
1325	Soluble pyridine nucleotide transhydrogenase stha OS=Nannochloropsis gaditana (strain CCMP526) GN=NGA_0545300 PE=4 SV=1	K8YRQ7_NANGC	NGA_0545300	22 kDa	9	0.4	0.0064	15.19	15.26	15.4	15.3	15.62	15.65	15.8	15.67	-0.1228	-0.0351	0.1055	0.0078	0.3002	0.35	0.4818	0.3474
1326	T-complex protein 1 subunit delta OS=Nannochloropsis gaditana GN=Naga_100011g18 PE=3 SV=1	W7T7M9_9STRA	Naga_100011g18	60 kDa	26	0.12	0.0064	15.68	15.6	15.75	15.72	15.79	15.86	15.83	15.71	-0.0118	-0.0943	0.0537	0.0281	0.1107	0.1835	0.1432	0.014
1327	Conserved uncharacterized protein OS=Nannochloropsis gaditana GN=Naga_100208g8 PE=4 SV=1	W7T793_9STRA	Naga_100208g8	73 kDa	8	0.24	0.0068	16.9	16.74	16.86	16.67	17.14	16.94	17.04	16.96	0.1223	-0.0491	0.0751	-0.1073	0.3652	0.1555	0.2567	0.1677
1328	Leucyl aminopeptidase OS=Nannochloropsis gaditana GN=Naga_100065g23 PE=3 SV=1	W7TE43_9STRA	Naga_100065g23	63 kDa	65	-0.08	0.007	16.42	16.42	16.34	16.38	16.31	16.33	16.31	16.29	0.0257	0.0338	-0.0391	-0.0017	-0.074	-0.0597	-0.0824	-0.0971
1329	S-adenosylmethionine mitochondrial carrier protein OS=Nannochloropsis gaditana (strain CCMP526) GN=NGA_0115501 PE=3 SV=1	K8Z4E8_NANGC	NGA_0115501	49 kDa	41	-0.12	0.007	15.83	15.76	15.71	15.7	15.78	15.55	15.54	15.58	0.0917	0.009	-0.0281	-0.0488	0.0491	-0.189	-0.1938	-0.1805
1330	Uncharacterized protein OS=Nannochloropsis gaditana GN=Naga_100135g15 PE=4 SV=1	W7TGS8_9STRA	Naga_100135g15	39 kDa	28	0.2	0.007	16.78	16.64	16.79	16.72	16.89	16.96	16.97	16.94	0.0429	-0.0864	0.0656	-0.0164	0.1495	0.2326	0.2276	0.2108
1331	Large subunit ribosomal protein L10e OS=Nannochloropsis gaditana (strain CCMP526) GN=RP-L10E PE=4 SV=1	K8ZA02_NANGC (+1)	RP-L10E	24 kDa	28	-0.23	0.007	17.7	17.65	17.71	17.69	17.44	17.47	17.56	17.34	-0.0032	-0.0303	0.0203	0.0026	-0.2393	-0.2148	-0.1255	-0.3309
1332	Stomatin prohibitin-family membrane protease subunit OS=Nannochloropsis gaditana GN=Naga_100006g80 PE=4 SV=1	W7TQX6_9STRA	Naga_100006g80	49 kDa	20	0.11	0.007	16.83	16.91	16.89	16.86	16.85	16.99	17.08	16.97	-0.0493	0.0399	0.018	-0.0106	-0.0224	0.1126	0.2057	0.0936
1333	Nucleoside diphosphate kinase OS=Nannochloropsis gaditana (strain CCMP526) GN=NDK PE=3 SV=1	K8YSY3_NANGC (+1)	NDK	23 kDa	15	-0.24	0.007	17.23	17.29	17.23	17.13	17	17.05	16.94	16.93	0.0079	0.0866	0.0255	-0.0952	-0.2195	-0.1535	-0.2889	-0.2711
1334	Uncharacterized protein OS=Nannochloropsis gaditana GN=Naga_100003g49 PE=4 SV=1	W7UBW2_9STRA	Naga_100003g49	23 kDa	14	-0.11	0.007	15.49	15.53	15.48	15.5	15.44	15.3	15.37	15.45	-0.0058	0.0285	-0.0206	0.0006	-0.068	-0.2025	-0.1313	-0.0515
1335	Small ubiquitin-like modifier OS=Nannochloropsis gaditana GN=Naga_100083g7 PE=4 SV=1	W7U9I0_9STRA	Naga_100083g7	13 kDa	13	0.17	0.007	17.49	17.86	17.66	17.77	17.73	17.99	17.95	17.85	-0.2561	0.138	-0.0573	0.0529	0.0146	0.2719	0.2245	0.1292
1336	Glutamyl-tRNA(Gln) amidotransferase subunit B, mitochondrial OS=Nannochloropsis gaditana GN=gatB PE=3 SV=1	W7U0I3_9STRA	gatB	47 kDa	12	-0.13	0.007	16.07	16.12	16.19	16.08	16	16.03	15.9	16	-0.0437	-0.0083	0.0857	-0.0341	-0.113	-0.1	-0.2214	-0.1253
1337	Uncharacterized protein (Fragment) OS=Nannochloropsis gaditana GN=Naga_100520g2 PE=4 SV=1	W7U3B5_9STRA	Naga_100520g2	13 kDa	12	0.19	0.007	14.36	14.36	14.13	14.14	14.53	14.45	14.46	14.31	0.0992	0.126	-0.1229	-0.1077	0.2891	0.1893	0.2074	0.0597
1338	Uncharacterized protein OS=Nannochloropsis gaditana GN=Naga_100082g13 PE=4 SV=1	W7TA95_9STRA	Naga_100082g13	17 kDa	7	0.25	0.007	17.03	17.02	16.95	16.98	17.33	17.22	17.28	17.15	0.0292	0.0298	-0.0499	-0.0132	0.3301	0.2229	0.2804	0.1373
1339	O-acyltransferase WSD1 OS=Nannochloropsis gaditana GN=Naga_100114g6 PE=4 SV=1	W7U9R7_9STRA	Naga_100114g6	56 kDa	6	-0.29	0.007	15.62	15.52	15.51	15.51	15.22	15.16	15.43	15.2	0.0811	-0.0271	-0.0267	-0.0318	-0.3159	-0.3768	-0.121	-0.3318
1340	Na+ h+ antiporter OS=Nannochloropsis gaditana GN=Naga_100027g6 PE=4 SV=1	W7TKF6_9STRA	Naga_100027g6	176 kDa	5	0.46	0.007	15.26	15.39	15.33	15.54	15.73	15.9	15.86	15.94	-0.1507	0.0057	-0.0471	0.1557	0.3402	0.5038	0.4328	0.5549
1341	Nuclear migration protein nudC putative OS=Nannochloropsis gaditana GN=Naga_100013g4 PE=4 SV=1	W7UC37_9STRA	Naga_100013g4	38 kDa	4	-0.21	0.007	16.32	16.13	16.31	16.34	16.16	15.94	16.07	16.09	0.0458	-0.1464	0.0284	0.0592	-0.118	-0.3386	-0.1982	-0.1886
1342	Fad-linked oxidoreductase OS=Nannochloropsis gaditana (strain CCMP526) GN=NGATSA_3013200 PE=2 SV=1	I2CP16_NANGC	NGATSA_3013200	69 kDa	4	0.46	0.007	14.9	14.83	15.4	15.22	15.56	15.27	15.73	16.05	-0.1993	-0.254	0.2898	0.1025	0.4227	0.1465	0.5755	0.9175
1343	Peptidase M50 OS=Nannochloropsis gaditana GN=Naga_100056g33 PE=4 SV=1	W7U2Z8_9STRA	Naga_100056g33	50 kDa	4	0.2	0.007	16.64	16.34	16.66	16.42	16.73	16.73	16.75	16.68	0.1268	-0.1852	0.1492	-0.1041	0.21	0.2102	0.2296	0.1505
1344	Uncharacterized protein (Fragment) OS=Nannochloropsis gaditana GN=Naga_102773g1 PE=4 SV=1	W7T6C4_9STRA	Naga_102773g1	24 kDa	3	-0.28	0.007	15.11	15.56	15.49	15.32	14.93	15.28	14.86	15.23	-0.2549	0.1901	0.1397	-0.0514	-0.4377	-0.0858	-0.5034	-0.1418
1345	Uncharacterized protein (Fragment) OS=Nannochloropsis gaditana (strain CCMP526) GN=NGATSA_3015300 PE=2 SV=1	I2CPG4_NANGC	NGATSA_3015300	36 kDa	3	0.39	0.007	12.61	12.76	13.16	13.06	13.27	13.09	13.61	13.19	-0.3555	-0.1587	0.2403	0.143	0.359	0.1835	0.7044	0.2739
1346	Cullin protein 1 OS=Nannochloropsis gaditana GN=Naga_100137g4 PE=3 SV=1	W7T9D7_9STRA	Naga_100137g4	96 kDa	2	0.25	0.007	15.75	15.55	15.78	15.67	15.87	15.98	15.94	15.95	0.055	-0.1369	0.0915	-0.0236	0.1799	0.2845	0.2462	0.2529
1347	Aldehyde reductase i (Fragment) OS=Nannochloropsis gaditana (strain CCMP526) GN=NGA_0683200 PE=4 SV=1	K8Z9U8_NANGC	NGA_0683200	23 kDa	4	0.25	0.007	15.65	15.88	15.92	15.91	16.06	16.13	16.04	16.12	-0.1869	0.0395	0.0814	0.0668	0.2312	0.2932	0.1991	0.2714
1348	Tyrosine-protein phosphatase family, C-terminal domain protein OS=Nannochloropsis gaditana GN=Naga_100477g4 PE=4 SV=1	W7TPH7_9STRA	Naga_100477g4	45 kDa	2	0.2	0.007	16.45	16.21	16.46	16.4	16.58	16.48	16.73	16.6	0.0551	-0.1867	0.0674	0.0044	0.181	0.0836	0.3262	0.2018
1349	Uncharacterized protein OS=Nannochloropsis gaditana (strain CCMP526) GN=NGA_0307202 PE=4 SV=1	K8ZAR4_NANGC	NGA_0307202	29 kDa	2	-0.24	0.007	15.68	15.39	15.64	15.58	15.16	15.49	15.39	15.26	0.1088	-0.1857	0.0627	0.0011	-0.4182	-0.0882	-0.1821	-0.3097
1350	Prefoldin subunit 3 OS=Nannochloropsis gaditana GN=Naga_100153g10 PE=3 SV=1	W7T596_9STRA	Naga_100153g10	24 kDa	2	0.23	0.007	17.02	16.86	16.99	17.04	17.24	17.26	17.17	17.16	0.0431	-0.1179	0.0178	0.0629	0.2659	0.2748	0.1965	0.1801
1351	50S ribosomal protein L2 OS=Nannochloropsis gaditana GN=rpl2 PE=4 SV=1	K9ZXC5_9STRA	rpl2	31 kDa	3	0.23	0.007	15.06	15.12	15.32	15.18	15.23	15.53	15.41	15.4	-0.1161	-0.0528	0.1498	0.0115	0.0548	0.3665	0.2477	0.2296
1352	Uncharacterized protein OS=Nannochloropsis gaditana GN=Naga_100924g3 PE=4 SV=1	W7U6I9_9STRA	Naga_100924g3	57 kDa	2	0.33	0.007	15.87	15.65	15.73	15.73	16.17	16.21	15.95	15.93	0.1216	-0.096	-0.0123	-0.014	0.4257	0.4578	0.2053	0.1783
1353	Uncharacterized protein OS=Nannochloropsis gaditana (strain CCMP526) GN=NGATSA_3027100 PE=2 SV=1	I2CQ18_NANGC	NGATSA_3027100	10 kDa	27	-0.13	0.0072	14.72	14.64	14.73	14.82	14.58	14.47	14.76	14.56	-0.0071	-0.0822	0.0093	0.1083	-0.1684	-0.2509	0.0297	-0.1756
1354	Short-chain dehydrogenase reductase sdr OS=Nannochloropsis gaditana GN=Naga_100105g17 PE=3 SV=1	W7TLG0_9STRA	Naga_100105g17	44 kDa	29	-0.11	0.0072	15.97	16.1	16.04	15.97	15.81	16.09	15.86	15.92	-0.0402	0.0852	0.0203	-0.0529	-0.2151	0.07	-0.1659	-0.1024
1355	Dolichyl-diphosphooligosaccharide--protein glycosyltransferase OS=Nannochloropsis gaditana (strain CCMP526) GN=NGATSA_3013000 PE=2 SV=1	I2CR01_NANGC	NGATSA_3013000	100 kDa	17	-0.15	0.0073	16.76	16.81	16.88	16.86	16.6	16.75	16.77	16.55	-0.0676	-0.0192	0.0392	0.04	-0.225	-0.0734	-0.0518	-0.2682
1356	40s ribosomal protein s15 OS=Nannochloropsis gaditana GN=Naga_100023g32 PE=3 SV=1	W7T6H9_9STRA	Naga_100023g32	28 kDa	12	-0.22	0.0074	16.3	16.36	16.31	16.41	15.86	16.22	16.25	16.16	-0.0582	0.019	-0.0392	0.0693	-0.5024	-0.1338	-0.1071	-0.1942
1357	Uncharacterized protein OS=Nannochloropsis gaditana (strain CCMP526) GN=NGATSA_3009500 PE=2 SV=1	I2CQV4_NANGC	NGATSA_3009500	33 kDa	8	-0.18	0.0074	16.75	16.91	16.91	16.86	16.74	16.75	16.62	16.63	-0.1248	0.045	0.0432	0.001	-0.1343	-0.1165	-0.2375	-0.2364
1358	Enolase OS=Nannochloropsis gaditana GN=Naga_100022g39 PE=3 SV=1	W7TUA2_9STRA	Naga_100022g39	54 kDa	202	0.06	0.008	16.08	16.19	16.01	15.99	16.14	16.17	16.13	16.08	0.0107	0.1299	-0.0474	-0.0731	0.0776	0.0998	0.063	0.0171
1359	Translocated promoter region OS=Nannochloropsis gaditana GN=Naga_100080g19 PE=4 SV=1	W7U331_9STRA	Naga_100080g19	230 kDa	49	0.1	0.008	15.96	15.88	15.97	15.91	16.08	15.96	16.04	16.03	0.0338	-0.0525	0.0468	-0.0174	0.1362	0.0246	0.116	0.1047
1360	Putative small multi-drug export OS=Nannochloropsis gaditana GN=Naga_100505g3 PE=4 SV=1	W7T414_9STRA	Naga_100505g3	73 kDa	26	-0.08	0.008	15.5	15.38	15.61	15.6	15.35	15.42	15.54	15.48	-0.0252	-0.14	0.0842	0.0761	-0.1775	-0.1179	0.0067	-0.054
1361	Uncharacterized protein OS=Nannochloropsis gaditana (strain CCMP526) GN=NGA_0170500 PE=4 SV=1	K8Z905_NANGC	NGA_0170500	21 kDa	19	0.21	0.008	16.44	16.19	16.26	16.25	16.53	16.52	16.5	16.36	0.1635	-0.0882	-0.0173	-0.0254	0.2449	0.2389	0.2212	0.0841
1362	Uncharacterized protein OS=Nannochloropsis gaditana GN=Naga_100267g3 PE=4 SV=1	W7TWM2_9STRA	Naga_100267g3	15 kDa	14	-0.13	0.008	17.28	17.14	17.18	17.19	17.11	16.93	17.07	17.15	0.0892	-0.0515	-0.0274	0.0009	-0.0874	-0.2816	-0.1229	-0.0453
1363	Methionyl-tRNA synthetase OS=Nannochloropsis gaditana (strain CCMP526) GN=MARS PE=3 SV=1	K8YQC4_NANGC	MARS	87 kDa	9	0.12	0.008	16.11	15.99	16.25	16.24	16.29	16.14	16.42	16.2	-0.039	-0.1601	0.0963	0.093	0.1562	-0.0095	0.2773	0.0509
1364	Pyrophosphate--fructose-6-phosphate 1-phosphotransferase (Fragment) OS=Nannochloropsis gaditana (strain CCMP526) GN=PFK PE=4 SV=1	K8YTQ1_NANGC (+1)	PFK	117 kDa	9	0.11	0.008	14.85	15.02	15.09	14.98	15.05	15.22	15.05	15.1	-0.1466	0.0225	0.1117	-0.0028	0.0543	0.251	0.0683	0.1189
1365	Uncharacterized protein OS=Nannochloropsis gaditana GN=Naga_100433g5 PE=4 SV=1	W7T1R8_9STRA	Naga_100433g5	17 kDa	7	1.11	0.008	14.36	16.51	16.68	16.72	15.08	17.23	18	18.32	-2.1567	-0.002	0.1713	0.205	-1.4309	0.7276	1.4825	1.8061
1366	Histone deacetylase OS=Nannochloropsis gaditana (strain CCMP526) GN=HDAC1_2 PE=3 SV=1	K8YR89_NANGC (+1)	HDAC1_2	49 kDa	6	0.28	0.008	16.95	16.84	17.03	16.84	17.37	17.06	17.19	17.16	0.0617	-0.0817	0.1177	-0.0776	0.4606	0.1349	0.2526	0.2418
1367	UBX domain-containing protein OS=Nannochloropsis gaditana GN=Naga_100109g16 PE=4 SV=1	W7TQI1_9STRA	Naga_100109g16	59 kDa	5	0.25	0.008	14.44	14.49	14.75	14.61	14.85	14.65	14.87	14.9	-0.1266	-0.0825	0.19	0.0394	0.2932	0.0961	0.3084	0.3199
1368	Dihydrolipoamide s-acetyltransferase OS=Nannochloropsis gaditana GN=Naga_100006g108 PE=4 SV=1	W7U9C3_9STRA	Naga_100006g108	31 kDa	5	0.22	0.008	17.74	17.89	17.77	17.94	18.04	18.05	18.15	18.03	-0.1066	0.0528	-0.0686	0.098	0.2024	0.2219	0.2955	0.1865
1369	Uncharacterized protein OS=Nannochloropsis gaditana GN=Naga_100210g7 PE=4 SV=1	W7TWG4_9STRA	Naga_100210g7	34 kDa	4	0.24	0.008	15.29	15.08	15.06	14.98	15.57	15.28	15.19	15.37	0.1979	-0.0314	-0.0413	-0.1128	0.4634	0.1802	0.0933	0.2732
1370	3-oxoacyl-(Acyl-carrier-protein) reductase OS=Nannochloropsis gaditana GN=Naga_100024g16 PE=4 SV=1	W7U8F0_9STRA	Naga_100024g16	28 kDa	2	0.28	0.008	15.44	15.44	15.55	15.29	15.93	15.53	15.75	15.69	0.0026	0.0064	0.1187	-0.1407	0.4935	0.0926	0.3226	0.2571
1371	RNA cytidine acetyltransferase OS=Nannochloropsis gaditana (strain CCMP526) GN=NAT10 PE=3 SV=1	K8YNR7_NANGC (+1)	NAT10	106 kDa	2	0.39	0.008	13.87	14.08	14.13	14.12	14.35	14.11	14.5	14.74	-0.1832	0.0304	0.0824	0.0641	0.3005	0.0582	0.4483	0.6848
1372	Aldose 1-epimerase (Fragment) OS=Nannochloropsis gaditana (strain CCMP526) GN=GALM PE=4 SV=1	K8YX45_NANGC (+1)	GALM	33 kDa	2	0.27	0.008	16.04	16.17	16.14	15.96	16.39	16.37	16.27	16.34	-0.0413	0.0899	0.0565	-0.1158	0.3121	0.2945	0.1929	0.2566
1373	Dna topoisomerase OS=Nannochloropsis gaditana GN=Naga_101378g1 PE=4 SV=1	W7TSD5_9STRA	Naga_101378g1	25 kDa	3	0.26	0.0087	16.17	16	16.37	16.25	16.33	16.43	16.63	16.49	-0.0683	-0.2622	0.1483	0.0227	0.1035	0.2589	0.4167	0.3254
1374	Poly A polymerase, head domain protein OS=Nannochloropsis gaditana GN=Naga_101251g2 PE=3 SV=1	W7TAJ6_9STRA	Naga_101251g2	45 kDa	2	0.34	0.0089	16.05	16.44	16.51	16.4	16.57	16.76	16.7	16.8	-0.3276	0.0644	0.1298	0.0186	0.1872	0.3836	0.3226	0.4227
1375	Eukaryotic translation initiation factor isoform 1 OS=Nannochloropsis gaditana (strain CCMP526) GN=NGATSA_3001900 PE=2 SV=1	I2CQN8_NANGC	NGATSA_3001900	50 kDa	25	0.17	0.009	16.07	15.99	16.14	16.21	16.37	16.25	16.25	16.25	-0.0274	-0.1118	0.0328	0.1029	0.2708	0.1366	0.1333	0.1298
1376	Heat shock protein 101 OS=Nannochloropsis gaditana GN=Naga_100881g1 PE=4 SV=1	W7TMV0_9STRA	Naga_100881g1	44 kDa	15	0.23	0.009	14.95	14.86	14.98	14.9	15.15	15.11	15.14	15.18	0.036	-0.0736	0.0587	-0.0178	0.2116	0.1837	0.2078	0.2424
1377	Carboxyl-terminal protease OS=Nannochloropsis gaditana GN=Naga_100046g14 PE=4 SV=1	W7U2K5_9STRA	Naga_100046g14	58 kDa	13	0.11	0.009	15.54	15.62	15.52	15.6	15.73	15.66	15.7	15.63	-0.0485	0.0495	-0.0574	0.027	0.1625	0.0878	0.1161	0.064
1378	Riboflavin biosynthesis protein OS=Nannochloropsis gaditana GN=Naga_100002g158 PE=4 SV=1	W7TRI1_9STRA	Naga_100002g158	48 kDa	9	-0.27	0.009	14.72	14.5	14.33	14.42	14.16	14.32	14.15	14.26	0.2377	0.0158	-0.1588	-0.0676	-0.3239	-0.167	-0.3297	-0.2543
1379	Uncharacterized protein OS=Nannochloropsis gaditana GN=Naga_100117g17 PE=4 SV=1	W7TMB2_9STRA	Naga_100117g17	46 kDa	9	0.18	0.009	14.82	14.8	14.89	14.7	14.96	14.91	14.92	15.15	0.0092	-0.0253	0.0876	-0.1113	0.1796	0.1168	0.1151	0.3369
1380	SWAP/Surp OS=Nannochloropsis gaditana GN=Naga_100011g62 PE=4 SV=1	W7TP71_9STRA	Naga_100011g62	87 kDa	8	0.17	0.009	15.13	14.84	15.08	14.96	15.27	15.03	15.31	15.12	0.1208	-0.175	0.0638	-0.0584	0.2626	0.0116	0.3077	0.1146
1381	Acyl-dehydrogenase OS=Nannochloropsis gaditana GN=Naga_100017g26 PE=3 SV=1	W7UAJ9_9STRA	Naga_100017g26	48 kDa	5	0.55	0.009	15.67	15.85	15.89	15.86	16.43	16.39	16.34	16.27	-0.1543	0.04	0.0774	0.0422	0.6247	0.5581	0.5365	0.484
1382	Tim21-like mitochondrial-like protein OS=Nannochloropsis gaditana GN=Naga_100210g12 PE=4 SV=1	W7UCG1_9STRA	Naga_100210g12	39 kDa	4	0.23	0.009	16.34	15.95	16.3	16.19	16.34	16.41	16.62	16.38	0.138	-0.263	0.0922	-0.02	0.144	0.215	0.4137	0.1757
1383	Uncharacterized protein OS=Nannochloropsis gaditana GN=Naga_101203g2 PE=4 SV=1	W7TBD5_9STRA	Naga_101203g2	20 kDa	4	-0.22	0.009	15.52	15.34	15.68	15.62	15.35	15.3	15.37	15.28	-0.0226	-0.2066	0.1326	0.0804	-0.1972	-0.2415	-0.1743	-0.2703
1384	Uncharacterized protein OS=Nannochloropsis gaditana GN=Naga_100011g44 PE=4 SV=1	W7TPX1_9STRA	Naga_100011g44	52 kDa	3	0.24	0.009	14.31	14.2	14.57	14.45	14.38	14.7	14.76	14.67	-0.0721	-0.1879	0.183	0.0631	-0.0078	0.3213	0.3712	0.2796
1385	Peptidyl-prolyl cis-trans isomerase OS=Nannochloropsis gaditana (strain CCMP526) GN=NGA_0451700 PE=3 SV=1	K8YUC4_NANGC (+1)	NGA_0451700	25 kDa	3	0.24	0.009	16.48	16.46	16.57	16.49	16.55	16.91	16.73	16.73	-0.0208	-0.0353	0.0716	-0.0131	0.0523	0.4049	0.2342	0.2268
1386	Transcription factor IIS OS=Nannochloropsis gaditana GN=Naga_100009g96 PE=4 SV=1	W7TQY8_9STRA	Naga_100009g96	79 kDa	3	0.25	0.009	14.83	15.14	15.37	15.25	15.3	15.45	15.24	15.59	-0.3199	-0.0146	0.2162	0.0949	0.149	0.293	0.0867	0.436
1387	Nuclear GTP-binding protein (Fragment) OS=Nannochloropsis gaditana (strain CCMP526) GN=NUG1 PE=4 SV=1	K8Z8T2_NANGC (+1)	NUG1	50 kDa	2	0.41	0.009	12.88	13.15	13.29	13.22	13.32	13.77	13.32	13.86	-0.2779	0.0073	0.138	0.069	0.1627	0.6232	0.1681	0.7076
1388	Uncharacterized protein (Fragment) OS=Nannochloropsis gaditana GN=Naga_101140g4 PE=4 SV=1	W7T4P2_9STRA	Naga_101140g4	26 kDa	2	0.4	0.009	13.87	14.09	14.06	13.93	14.38	14.05	14.6	14.48	-0.1146	0.1054	0.0745	-0.0498	0.3993	0.0706	0.614	0.4959
1389	Ribosomal protein l30 OS=Nannochloropsis gaditana GN=Naga_101276g1 PE=4 SV=1	W7T0G1_9STRA	Naga_101276g1	15 kDa	26	-0.12	0.01	16.63	16.51	16.49	16.44	16.41	16.44	16.44	16.26	0.1216	0	-0.0374	-0.0706	-0.1108	-0.0756	-0.0686	-0.2621
1390	Ribosomal protein s20 OS=Nannochloropsis gaditana GN=Naga_100103g9 PE=3 SV=1	W7TLH5_9STRA	Naga_100103g9	14 kDa	27	-0.13	0.01	15.42	15.69	15.63	15.62	15.24	15.56	15.53	15.45	-0.1704	0.0885	0.0424	0.0252	-0.3583	-0.0275	-0.0594	-0.1336
1391	Cation-transporting ATPase OS=Nannochloropsis gaditana GN=Naga_100140g11 PE=3 SV=1	W7TW81_9STRA	Naga_100140g11	182 kDa	22	-0.1	0.01	15.7	15.66	15.78	15.77	15.57	15.67	15.6	15.69	-0.0333	-0.0708	0.0494	0.0378	-0.1652	-0.0587	-0.1378	-0.0538
1392	1, 4-beta cellobiohydrolase OS=Nannochloropsis gaditana GN=Naga_100493g1 PE=4 SV=1	W7T9H7_9STRA	Naga_100493g1	10 kDa	14	0.2	0.01	16.1	16.21	16.35	16.55	16.55	16.02	16.62	16.93	-0.2227	-0.1044	0.0373	0.2464	0.2382	-0.3014	0.2937	0.6198
1393	Nadh dehydrogenase OS=Nannochloropsis gaditana GN=NDA PE=4 SV=1	W7TF31_9STRA	NDA	28 kDa	13	-0.18	0.01	15.74	15.81	15.93	15.86	15.49	15.6	15.79	15.7	-0.085	-0.0269	0.0864	0.0177	-0.336	-0.2377	-0.0483	-0.153
1394	Uncharacterized protein OS=Nannochloropsis gaditana GN=Naga_100104g8 PE=4 SV=1	W7U438_9STRA	Naga_100104g8	42 kDa	14	-0.12	0.01	16.14	15.91	16.12	16.02	15.98	15.97	15.88	15.85	0.0926	-0.1328	0.0674	-0.0198	-0.0681	-0.0777	-0.156	-0.2016
1395	Protein fucoxanthin chlorophyll a c protein OS=Nannochloropsis gaditana (strain CCMP526) GN=NGA_0701000 PE=4 SV=1	K8ZCT6_NANGC	NGA_0701000	8 kDa	12	-0.36	0.01	16.65	16.38	16.63	16.61	16.43	16.12	16.32	16.05	0.0986	-0.2167	0.0574	0.0284	-0.128	-0.4601	-0.2494	-0.524
1396	Prolyl 4-hydroxylase, alpha subunit OS=Nannochloropsis gaditana GN=Naga_100021g38 PE=4 SV=1	W7TZH0_9STRA	Naga_100021g38	71 kDa	12	-0.19	0.01	14.82	14.75	14.77	14.93	14.86	14.64	14.55	14.55	-0.0083	-0.0724	-0.0564	0.1163	0.0167	-0.1815	-0.2734	-0.2791
1397	Signal peptide peptidase family protein OS=Nannochloropsis gaditana GN=Naga_100019g45 PE=4 SV=1	W7T3L6_9STRA	Naga_100019g45	54 kDa	10	-0.23	0.01	15.34	15.41	15.4	15.41	15.11	15.25	15.17	15.05	-0.0564	0.0231	0.0216	0.0266	-0.2589	-0.1309	-0.2045	-0.339
1398	Uncharacterized protein OS=Nannochloropsis gaditana GN=Naga_100577g2 PE=4 SV=1	W7TTQ3_9STRA	Naga_100577g2	16 kDa	11	0.14	0.01	17.22	17.18	17.32	17.34	17.39	17.34	17.47	17.45	-0.0529	-0.0836	0.0591	0.0738	0.1203	0.0687	0.1915	0.194
1399	Lysophospholipase II OS=Nannochloropsis gaditana (strain CCMP526) GN=LYPLA2 PE=4 SV=1	K8Z7I5_NANGC	LYPLA2	25 kDa	10	0.11	0.01	17.02	16.93	16.87	16.93	16.96	17.03	17.11	17.08	0.0859	-0.0089	-0.0662	-0.0026	0.0272	0.0825	0.1785	0.1475
1400	Glutathione synthetase OS=Nannochloropsis gaditana GN=GSS PE=4 SV=1	W7TMH0_9STRA	GSS	65 kDa	8	0.21	0.01	15.2	15.27	15.3	15.26	15.55	15.46	15.48	15.37	-0.0535	0.0172	0.0402	0.0053	0.2711	0.1992	0.2276	0.0969
1401	Elongation of fatty acids protein OS=Nannochloropsis gaditana (strain CCMP526) GN=NGA_0640610 PE=3 SV=1	K8YQD6_NANGC (+1)	NGA_0640610	37 kDa	7	-0.22	0.01	15.49	15.51	15.54	15.56	15.22	15.57	15.34	15.15	-0.0285	-0.0188	0.0141	0.0415	-0.3127	0.0284	-0.1852	-0.3894
1402	Peptidyl-prolyl cis-trans fkbp-type OS=Nannochloropsis gaditana (strain CCMP526) GN=NGATSA_3024200 PE=2 SV=1	I2CRD0_NANGC	NGATSA_3024200	33 kDa	7	0.26	0.01	15.36	15.12	15.23	15.41	15.45	15.67	15.44	15.62	0.0875	-0.1696	-0.0727	0.1101	0.1495	0.3766	0.1493	0.3287
1403	DNA topoisomerase 2 OS=Nannochloropsis gaditana GN=Naga_100062g27 PE=3 SV=1	W7TC60_9STRA	Naga_100062g27	169 kDa	7	-0.23	0.01	16.3	16.16	16.35	16.34	16.02	15.99	16.15	16.09	0.022	-0.1414	0.0568	0.0559	-0.2591	-0.3131	-0.138	-0.2437
1404	Nucleic acid-binding protein OS=Nannochloropsis gaditana GN=Naga_100155g5 PE=4 SV=1	W7T6D6_9STRA	Naga_100155g5	18 kDa	5	-0.29	0.01	14.89	15.35	15.23	15.14	14.82	14.85	14.91	14.93	-0.2707	0.1821	0.0653	-0.0196	-0.3529	-0.3117	-0.2586	-0.2416
1405	Dna-directed rna polymerase ii 19 kDa polypeptide OS=Nannochloropsis gaditana GN=Naga_100020g41 PE=4 SV=1	W7TB21_9STRA (+1)	Naga_100020g41	20 kDa	4	0.25	0.01	14.52	14.39	14.4	14.27	14.82	14.68	14.54	14.55	0.1271	0.0034	0.0103	-0.1119	0.4538	0.3125	0.1572	0.155
1406	Importin-like protein OS=Nannochloropsis gaditana GN=Naga_100071g8 PE=4 SV=1	W7TPK3_9STRA	Naga_100071g8	137 kDa	4	-0.31	0.01	14.63	14.47	14.81	14.75	14.14	14.48	14.36	14.41	-0.0468	-0.1783	0.1744	0.0961	-0.502	-0.1595	-0.3121	-0.2452
1407	DDENN OS=Nannochloropsis gaditana GN=Naga_100003g162 PE=4 SV=1	W7TW30_9STRA	Naga_100003g162	131 kDa	4	0.26	0.01	17.18	17.16	17.24	17.28	17.51	17.45	17.51	17.47	-0.0442	-0.039	0.0265	0.0753	0.2495	0.2351	0.2918	0.246
1408	Uncharacterized protein OS=Nannochloropsis gaditana GN=Naga_100025g38 PE=4 SV=1	W7TRT1_9STRA	Naga_100025g38	67 kDa	4	-0.2	0.01	16.69	16.66	16.68	16.69	16.47	16.41	16.5	16.6	0.028	-0.017	0.0032	0.0142	-0.2075	-0.2697	-0.1824	-0.1254
1409	Uncharacterized protein OS=Nannochloropsis gaditana GN=Naga_100022g20 PE=4 SV=1	W7U9Y6_9STRA	Naga_100022g20	21 kDa	3	-0.34	0.01	15.12	14.41	14.69	14.7	14.7	14.14	14.28	14.42	0.3954	-0.3085	-0.0268	-0.0352	-0.0239	-0.5804	-0.4406	-0.308
1410	Uncharacterized protein OS=Nannochloropsis gaditana GN=Naga_100511g5 PE=4 SV=1	W7U822_9STRA	Naga_100511g5	23 kDa	2	0.25	0.01	15.82	15.74	15.77	15.88	16.12	16.04	15.9	16.12	0.0192	-0.0595	-0.0335	0.0732	0.3212	0.2367	0.098	0.316
1411	Tubulin gamma chain OS=Nannochloropsis gaditana GN=TUG PE=3 SV=1	W7TPU7_9STRA	TUG	54 kDa	2	0.22	0.01	15.68	15.58	15.77	15.72	15.82	15.78	16.02	15.99	-0.0129	-0.1094	0.083	0.0337	0.1343	0.0914	0.3278	0.3034
1412	Triosephosphate isomerase (Fragment) OS=Nannochloropsis gaditana (strain CCMP526) GN=NGA_0486500 PE=3 SV=1	K8Z6D5_NANGC	NGA_0486500	21 kDa	31	-0.1	0.011	16.98	16.75	16.62	16.58	16.84	16.58	16.56	16.44	0.2777	0.0392	-0.0939	-0.1307	0.1263	-0.1257	-0.1562	-0.2739
1413	Rab1 family protein OS=Nannochloropsis gaditana GN=Rab1A PE=4 SV=1	W7TI50_9STRA	Rab1A	23 kDa	14	0.13	0.011	15.63	15.93	15.8	15.92	15.96	16.08	15.96	15.86	-0.2256	0.1007	-0.0348	0.0859	0.1126	0.2315	0.1219	0.0313
1414	Cysteine subfamily OS=Nannochloropsis gaditana GN=NFS PE=3 SV=1	W7TM03_9STRA	NFS	50 kDa	9	-0.29	0.011	15.7	15.9	15.72	15.82	15.5	15.6	15.24	15.56	-0.1161	0.1326	-0.0632	0.08	-0.2802	-0.1893	-0.5587	-0.225
1415	Chloride channel protein OS=Nannochloropsis gaditana GN=Naga_100035g11 PE=3 SV=1	W7UA92_9STRA	Naga_100035g11	109 kDa	5	0.53	0.011	11.32	11.29	11.65	11.84	12.07	11.9	12.48	12.01	-0.2556	-0.2776	0.0435	0.2703	0.5487	0.319	0.9392	0.488
1416	Uncharacterized protein OS=Nannochloropsis gaditana (strain CCMP526) GN=NGA_0424800 PE=4 SV=1	K8ZAL2_NANGC (+1)	NGA_0424800	35 kDa	5	0.14	0.011	16.24	16.12	16.39	16.48	16.47	16.34	16.44	16.5	-0.066	-0.1907	0.0843	0.1732	0.1712	0.0397	0.1385	0.1998
1417	Cas1p 10 TM acyl transferase domain protein OS=Nannochloropsis gaditana GN=Naga_100148g6 PE=4 SV=1	W7TFS8_9STRA	Naga_100148g6	119 kDa	6	0.19	0.011	15.98	15.9	15.96	15.89	16.07	16.1	16.09	16.26	0.0357	-0.0365	0.024	-0.0431	0.1438	0.1684	0.1486	0.3125
1418	Tesmin tso1-like cxc domain-containing protein (Fragment) OS=Nannochloropsis gaditana (strain CCMP526) GN=NGATSA_2014100 PE=2 SV=1	I2CP39_NANGC (+2)	NGATSA_2014100	53 kDa	5	0.24	0.011	14.63	14.79	15.16	14.93	15.09	15.19	15.09	15.2	-0.2885	-0.095	0.2673	0.0412	0.2051	0.3066	0.1803	0.3187
1419	Cellulase 2 OS=Nannochloropsis gaditana GN=Naga_100001g150 PE=3 SV=1	W7U1A3_9STRA	Naga_100001g150	53 kDa	5	-0.16	0.011	15.83	15.83	15.69	15.75	15.71	15.6	15.58	15.57	0.0682	0.0407	-0.0788	-0.0114	-0.0664	-0.1645	-0.1904	-0.2094
1420	Single-stranded dna-binding protein OS=Nannochloropsis gaditana GN=Naga_100057g16 PE=3 SV=1	W7TIN7_9STRA	Naga_100057g16	36 kDa	4	0.21	0.011	15.96	15.94	15.99	15.78	16.25	16.44	15.99	16.03	0.0401	0.0148	0.068	-0.1397	0.3311	0.4948	0.063	0.1201
1421	Transcription elongation factor spt5 OS=Nannochloropsis gaditana GN=Naga_100098g3 PE=4 SV=1	W7TWQ4_9STRA	Naga_100098g3	103 kDa	4	0.37	0.011	15.15	14.86	15.14	15.16	15.56	15.1	15.59	15.42	0.0794	-0.2188	0.0593	0.0816	0.4757	0.027	0.5066	0.3278
1422	N-alpha-acetyltransferase auxiliary subunit OS=Nannochloropsis gaditana GN=Naga_100145g18 PE=4 SV=1	W7TRW1_9STRA	Naga_100145g18	13 kDa	3	0.16	0.011	15.71	15.83	15.76	15.78	15.9	16.01	15.95	15.86	-0.0568	0.0582	-0.0076	0.0057	0.1445	0.2643	0.1795	0.0872
1423	Uncharacterized protein OS=Nannochloropsis gaditana GN=Naga_100004g78 PE=4 SV=1	W7TQ11_9STRA	Naga_100004g78	26 kDa	3	0.2	0.011	16.25	16.01	15.97	16.04	16.31	16.15	16.38	16.21	0.1852	-0.0572	-0.0993	-0.0191	0.2465	0.0848	0.3208	0.1487
1424	Translation initiation factor eif-2b subunit beta OS=Nannochloropsis gaditana GN=EIF2Bbeta PE=3 SV=1	W7TWQ5_9STRA	EIF2Bbeta	40 kDa	3	0.24	0.011	14.84	14.78	15.02	14.95	15.11	15.16	15.15	15.16	-0.0547	-0.1202	0.1174	0.0495	0.2156	0.2584	0.2523	0.2598
1425	Ribosomal protein L18e/L15P OS=Nannochloropsis gaditana GN=Naga_100579g2 PE=3 SV=1	W7U3I7_9STRA	Naga_100579g2	38 kDa	3	0.37	0.011	15.29	15.67	15.87	15.59	16.02	15.78	15.88	16.27	-0.3305	0.0496	0.2573	-0.0234	0.4058	0.165	0.259	0.6553
1426	30S ribosomal protein S12 OS=Nannochloropsis gaditana GN=rps12 PE=3 SV=1	T1R8H2_9STRA	rps12	14 kDa	3	-0.24	0.011	15.8	15.85	15.88	15.91	15.53	15.53	15.7	15.68	-0.0581	-0.0118	0.0156	0.049	-0.3657	-0.3233	-0.1579	-0.1834
1427	Glutathione synthetase OS=Nannochloropsis gaditana GN=gshB PE=3 SV=1	W7T4H4_9STRA	gshB	65 kDa	3	0.23	0.011	16.2	16.06	16.41	16.29	16.36	16.39	16.62	16.56	-0.0442	-0.1812	0.1647	0.0406	0.1119	0.151	0.378	0.3074
1428	Uncharacterized protein OS=Nannochloropsis gaditana GN=Naga_100131g1 PE=4 SV=1	W7TN20_9STRA	Naga_100131g1	19 kDa	2	0.25	0.011	15.21	15.3	15.2	15.02	15.7	15.34	15.42	15.3	0.0224	0.1149	0.0185	-0.1654	0.5194	0.1589	0.2287	0.1204
1429	Drug metabolite transporter superfamily OS=Nannochloropsis gaditana GN=Naga_100225g1 PE=4 SV=1	W7UAT2_9STRA	Naga_100225g1	55 kDa	2	0.35	0.011	16.23	16.31	16.59	16.32	16.82	16.65	16.65	16.81	-0.1385	-0.0544	0.2233	-0.0472	0.4465	0.2897	0.288	0.4412
1430	Glutamine synthetase OS=Nannochloropsis gaditana GN=Naga_100056g25 PE=3 SV=1	W7U2J3_9STRA	Naga_100056g25	43 kDa	75	0.15	0.012	15.43	15.41	15.4	15.4	15.49	15.52	15.58	15.6	0.0022	-0.0004	-0.0145	-0.0041	0.0835	0.1151	0.1738	0.1905
1431	Signal peptidase I OS=Nannochloropsis gaditana (strain CCMP526) GN=SEC11 PE=3 SV=1	K8ZB45_NANGC	SEC11	40 kDa	29	0.11	0.012	16.61	16.26	16.47	16.41	16.65	16.51	16.48	16.51	0.1734	-0.1722	0.0343	-0.0163	0.2105	0.0767	0.0444	0.0869
1432	Dihydrodipicolinate synthase OS=Nannochloropsis gaditana GN=Naga_100082g5 PE=3 SV=1	W7TCF4_9STRA	Naga_100082g5	37 kDa	28	-0.12	0.012	17.69	17.73	17.58	17.59	17.66	17.51	17.48	17.49	0.0339	0.0845	-0.0667	-0.0427	0.009	-0.1434	-0.1728	-0.1539
1433	Ribosomal protein L28e OS=Nannochloropsis gaditana GN=Naga_101068g1 PE=4 SV=1	W7TKX6_9STRA	Naga_101068g1	22 kDa	29	-0.21	0.012	15.71	16.57	16.5	16.52	15.84	16.25	16.33	16.26	-0.6921	0.1637	0.0853	0.1223	-0.5607	-0.1617	-0.0793	-0.1542
1434	Cluster of Nad-dependent epimerase dehydratase OS=Nannochloropsis gaditana GN=Naga_100279g6 PE=4 SV=1 (W7TFA6_9STRA)	W7TFA6_9STRA [2]	Naga_100279g6	40 kDa	17	0.36	0.012	16.24	15.88	16.1	16.01	16.55	16.28	16.43	16.42	0.1619	-0.1442	0.0196	-0.0521	0.5097	0.2322	0.3918	0.3851
1435	NAD(P)-binding domain protein OS=Nannochloropsis gaditana GN=Naga_100013g32 PE=4 SV=1	W7TWU1_9STRA	Naga_100013g32	38 kDa	24	-0.11	0.012	15.48	15.29	15.32	15.35	15.2	15.34	15.25	15.14	0.1157	-0.0684	-0.035	-0.0024	-0.1528	-0.0194	-0.1112	-0.212
1436	3-hydroxyacyl-CoA dehydrogenase OS=Nannochloropsis gaditana (strain CCMP526) GN=HADH PE=3 SV=1	K8YU30_NANGC (+1)	HADH	18 kDa	23	-0.1	0.012	16.21	16.19	16.09	16.04	16.04	16.11	16.02	15.95	0.0859	0.0488	-0.0358	-0.0858	-0.0891	-0.0251	-0.1087	-0.1869
1437	Uncharacterized protein OS=Nannochloropsis gaditana GN=Naga_101527g3 PE=4 SV=1	W7T3Z4_9STRA	Naga_101527g3	21 kDa	16	0.13	0.012	16.37	16.24	16.41	16.3	16.55	16.32	16.54	16.42	0.0466	-0.0972	0.0806	-0.0404	0.2249	-0.0061	0.2076	0.0824
1438	Mitochondrial 3-hydroxyisobutyryl OS=Nannochloropsis gaditana GN=Naga_100066g18 PE=4 SV=1	W7TNR1_9STRA	Naga_100066g18	90 kDa	13	0.11	0.012	15.99	15.86	15.93	15.94	16.11	16.05	15.98	16.05	0.0664	-0.0741	0.0026	0.0091	0.1713	0.1168	0.0542	0.1315
1439	Threonine aldolase OS=Nannochloropsis gaditana GN=Naga_100023g55 PE=4 SV=1	W7T6H0_9STRA	Naga_100023g55	96 kDa	8	0.22	0.012	15.03	15.04	15.1	15.11	15.32	15.18	15.33	15.3	-0.0396	-0.0263	0.024	0.0509	0.2301	0.0966	0.2622	0.2192
1440	Mitochondrial import inner membrane translocase subunit tim23 OS=Nannochloropsis gaditana GN=TIM23 PE=4 SV=1	W7TXH2_9STRA	TIM23	28 kDa	9	0.24	0.012	15.81	15.71	15.82	15.82	15.99	16.06	16.08	16	0.0192	-0.0708	0.0292	0.0312	0.2007	0.2707	0.2824	0.1854
1441	Ubiquitin-conjugating enzyme catalytic domain protein OS=Nannochloropsis gaditana GN=Naga_100003g79 PE=3 SV=1	W7UC14_9STRA	Naga_100003g79	89 kDa	8	0.16	0.012	14.76	14.97	15.17	15.1	15.06	15.07	15.23	15.31	-0.2495	-0.0349	0.1661	0.0885	0.0521	0.068	0.2297	0.3297
1442	Nitric oxide dioxygenase OS=Nannochloropsis gaditana (strain CCMP526) GN=HMP PE=4 SV=1	K8YWN8_NANGC	HMP	55 kDa	6	-0.2	0.012	15.86	15.73	15.96	16.02	15.84	15.5	15.58	15.7	-0.0365	-0.1623	0.0629	0.124	-0.0437	-0.4319	-0.3034	-0.2352
1443	Frataxin-like protein OS=Nannochloropsis gaditana GN=Naga_100046g37 PE=4 SV=1	W7TU91_9STRA	Naga_100046g37	23 kDa	5	0.16	0.012	16.66	16.73	16.66	16.64	16.69	16.94	16.83	16.9	-0.0432	0.0659	-0.0121	-0.0309	0.0238	0.2819	0.1598	0.2273
1444	U4 tri-snrnp-associated protein 2 OS=Nannochloropsis gaditana GN=Naga_100205g2 PE=4 SV=1	W7U8P5_9STRA	Naga_100205g2	65 kDa	5	0.32	0.012	15.51	15.36	15.53	15.7	15.78	15.87	15.93	15.74	-0.0255	-0.1617	-0.0029	0.1769	0.2523	0.3554	0.4201	0.2334
1445	5-formyltetrahydrofolate cyclo-ligase OS=Nannochloropsis gaditana (strain CCMP526) GN=NGA_0137300 PE=4 SV=1	K8YR40_NANGC	NGA_0137300	13 kDa	5	0.19	0.012	14.04	14.09	14.29	14.15	14.26	14.54	14.28	14.27	-0.1087	-0.059	0.1499	0.0097	0.1221	0.4038	0.1392	0.1312
1446	Rae1-like protein OS=Nannochloropsis gaditana GN=Naga_100017g32 PE=4 SV=1	W7TRC1_9STRA	Naga_100017g32	46 kDa	5	0.19	0.012	15.42	15.51	15.49	15.47	15.85	15.64	15.68	15.52	-0.0669	0.0444	0.0107	-0.011	0.3659	0.1596	0.2002	0.0426
1447	Uncharacterized protein OS=Nannochloropsis gaditana GN=Naga_100211g7 PE=4 SV=1	W7TJU1_9STRA	Naga_100211g7	35 kDa	3	0.27	0.012	16.96	16.63	16.83	16.79	17.1	17.06	17.1	16.99	0.1664	-0.1619	0.0238	-0.0001	0.3015	0.2505	0.3029	0.1874
1448	Uncharacterized protein OS=Nannochloropsis gaditana (strain CCMP526) GN=NGA_2005910 PE=2 SV=1	I2CP90_NANGC (+1)	NGA_2005910	43 kDa	4	0.25	0.012	14.66	14.94	15	14.88	14.93	15.12	15.07	15.38	-0.2471	0.0561	0.1146	-0.0098	0.0207	0.2327	0.1856	0.4986
1449	Tpr domain protein OS=Nannochloropsis gaditana GN=Naga_100017g52 PE=4 SV=1	W7UA25_9STRA	Naga_100017g52	41 kDa	2	0.42	0.012	13.94	14.29	14.57	14.42	14.69	14.54	14.73	15.03	-0.3785	-0.0327	0.2565	0.1029	0.3676	0.2176	0.4042	0.7167
1450	Snf2 domanin containing helicase OS=Nannochloropsis gaditana GN=Naga_100058g25 PE=4 SV=1	W7TYC6_9STRA	Naga_100058g25	98 kDa	2	0.62	0.012	15.44	16.05	16.6	16.35	16.57	16.66	16.88	17.23	-0.7985	-0.1907	0.3618	0.1146	0.3309	0.4235	0.6449	0.9943
1451	Adp-ribosylation factor OS=Nannochloropsis gaditana GN=Arf1 PE=3 SV=1	W7TL63_9STRA	Arf1	21 kDa	25	0.16	0.013	17.23	16.92	16.87	16.96	17.17	17.14	17.13	17.1	0.2627	-0.0547	-0.1048	-0.0177	0.2054	0.1629	0.1509	0.1306
1452	Pentatricopeptide repeat-containing protein OS=Nannochloropsis gaditana (strain CCMP526) GN=NGATSA_3002500 PE=2 SV=1	I2CQP4_NANGC	NGATSA_3002500	45 kDa	14	-0.11	0.013	15.56	15.62	15.77	15.62	15.47	15.55	15.48	15.59	-0.0778	-0.0145	0.1401	-0.0215	-0.1638	-0.0926	-0.1617	-0.0376
1453	Ubiquitin-conjugating enzyme OS=Nannochloropsis gaditana GN=Naga_100048g18 PE=4 SV=1	W7TFT4_9STRA	Naga_100048g18	18 kDa	13	0.13	0.013	16.36	16.24	16.24	16.16	16.47	16.35	16.37	16.32	0.1222	-0.0073	-0.0081	-0.0929	0.2152	0.1043	0.1309	0.0763
1454	Protein phosphatase 2c OS=Nannochloropsis gaditana GN=Naga_100185g8 PE=3 SV=1	W7U3U0_9STRA	Naga_100185g8	68 kDa	14	-0.2	0.013	15.52	15.59	15.59	15.51	15.38	15.52	15.14	15.41	-0.0855	0.0564	0.0576	-0.0287	-0.1762	-0.0373	-0.4378	-0.149
1455	Protein kinase, ATP binding site OS=Nannochloropsis gaditana GN=Naga_100005g31 PE=4 SV=1	W7TY92_9STRA	Naga_100005g31	73 kDa	13	0.15	0.013	15.6	15.43	15.57	15.6	15.64	15.65	15.82	15.68	0.0592	-0.1277	0.0248	0.0524	0.0934	0.0918	0.2778	0.1312
1456	Uncharacterized protein OS=Nannochloropsis gaditana GN=Naga_100678g4 PE=4 SV=1	W7TC04_9STRA	Naga_100678g4	17 kDa	9	0.16	0.013	17.15	17.3	17.09	17.02	17.49	17.26	17.32	17.24	-0.0006	0.1477	-0.0519	-0.1262	0.3302	0.1082	0.177	0.0952
1457	Ubiquitin family protein OS=Nannochloropsis gaditana GN=Naga_100044g34 PE=4 SV=1	W7TLV2_9STRA	Naga_100044g34	16 kDa	5	0.15	0.013	17.63	17.72	17.61	17.8	17.77	17.88	17.88	17.85	-0.0698	0.0274	-0.0684	0.1045	0.074	0.1959	0.1751	0.1504
1458	Uncharacterized protein (Fragment) OS=Nannochloropsis gaditana GN=Naga_100307g6 PE=4 SV=1	W7T4H3_9STRA	Naga_100307g6	30 kDa	7	0.28	0.013	16.52	16.55	16.79	16.56	16.92	16.87	16.76	17	-0.0991	-0.0362	0.194	-0.0551	0.2958	0.2421	0.1512	0.4045
1459	Glutaredoxin-like protein OS=Nannochloropsis gaditana GN=Naga_100532g3 PE=4 SV=1	W7TU87_9STRA	Naga_100532g3	17 kDa	6	-0.26	0.013	16.42	16.24	15.99	15.96	16.08	16.03	15.72	15.6	0.3085	0.1211	-0.1383	-0.1655	-0.0631	-0.0992	-0.4075	-0.536
1460	Pstvd rna-biding virp1 OS=Nannochloropsis gaditana GN=Naga_100027g22 PE=4 SV=1	W7TKE9_9STRA	Naga_100027g22	66 kDa	5	0.17	0.013	16.1	16.17	16.16	16.22	16.47	16.34	16.28	16.26	-0.0777	-0.0012	-0.0089	0.0467	0.2968	0.1651	0.1068	0.0869
1461	Nuclear pore complex protein Nup98-Nup96 OS=Nannochloropsis gaditana (strain CCMP526) GN=NGATSA_2004300 PE=2 SV=1	I2CQP7_NANGC (+1)	NGATSA_2004300	124 kDa	4	0.18	0.013	13.66	13.59	13.84	13.62	13.72	13.96	13.92	13.83	-0.0103	-0.1032	0.162	-0.0663	0.0403	0.2718	0.228	0.1458
1462	Splicing arginine serine-rich 2 OS=Nannochloropsis gaditana GN=Naga_100487g3 PE=4 SV=1	W7TKT0_9STRA	Naga_100487g3	20 kDa	4	0.43	0.013	13.71	13.35	13.66	13.26	13.99	13.67	14.08	14	0.212	-0.1708	0.1644	-0.262	0.5304	0.158	0.6202	0.4884
1463	Cen OS=Nannochloropsis gaditana GN=CEN PE=4 SV=1	W7TMT5_9STRA	CEN	21 kDa	4	0.26	0.013	15.52	15.67	15.68	15.64	16.11	15.72	15.7	16.01	-0.1086	0.0397	0.05	0.0061	0.4826	0.0948	0.0765	0.3803
1464	Hydrolase-like protein OS=Nannochloropsis gaditana GN=Naga_100012g53 PE=4 SV=1	W7TDG1_9STRA	Naga_100012g53	44 kDa	3	0.18	0.013	15.23	15.48	15.59	15.55	15.49	15.55	15.72	15.85	-0.2362	0.0078	0.1178	0.0796	0.0193	0.0828	0.2468	0.3783
1465	Uncharacterized protein OS=Nannochloropsis gaditana GN=Naga_100004g66 PE=4 SV=1	W7TM39_9STRA	Naga_100004g66	38 kDa	3	0.21	0.013	15.17	15.09	14.96	15.06	15.27	15.31	15.45	15.1	0.0951	0.023	-0.1109	-0.0178	0.2004	0.2424	0.3814	0.0269
1466	Uncharacterized protein OS=Nannochloropsis gaditana (strain CCMP526) GN=NGA_0593800 PE=4 SV=1	K8YQG7_NANGC	NGA_0593800	71 kDa	3	-0.24	0.013	15.84	15.67	15.79	15.77	15.69	15.49	15.46	15.45	0.0723	-0.0952	0.0272	0.0112	-0.0743	-0.2708	-0.2965	-0.3011
1467	Nuclear pore complex protein Nup155 (Fragment) OS=Nannochloropsis gaditana (strain CCMP526) GN=NGATSA_3021400 PE=2 SV=1	I2CP24_NANGC	NGATSA_3021400	71 kDa	3	0.25	0.013	13.63	13.76	13.84	13.96	13.9	14.03	14.2	14.06	-0.1725	-0.0402	0.0465	0.1599	0.1306	0.234	0.3896	0.2622
1468	DNA-(apurinic or apyrimidinic site) lyase OS=Nannochloropsis gaditana GN=Naga_100484g4 PE=3 SV=1	W7TRL7_9STRA	Naga_100484g4	60 kDa	2	0.39	0.013	13.59	13.2	14.02	13.56	13.89	13.92	14	14.12	0.0047	-0.3927	0.4327	-0.0231	0.299	0.3289	0.4151	0.5255
1469	GTP-binding nuclear protein OS=Nannochloropsis gaditana GN=Naga_100100g13 PE=3 SV=1	W7TTE5_9STRA	Naga_100100g13	25 kDa	31	0.12	0.014	16.12	16.43	16.33	16.39	16.42	16.47	16.51	16.39	-0.2019	0.0947	0.0032	0.0674	0.0866	0.1423	0.1859	0.0645
1470	Nadh-dependent fumarate reductase OS=Nannochloropsis gaditana GN=Naga_100015g37 PE=4 SV=1	W7U4A5_9STRA	Naga_100015g37	142 kDa	28	0.08	0.014	15.71	15.83	15.77	15.74	15.85	15.85	15.84	15.85	-0.0601	0.0755	0.002	-0.0222	0.0803	0.0793	0.078	0.0953
1471	Acyl dehydratase OS=Nannochloropsis gaditana GN=Naga_100049g34 PE=4 SV=1	W7TWM1_9STRA	Naga_100049g34	41 kDa	21	0.1	0.014	15.14	15.21	15.26	15.32	15.33	15.28	15.37	15.39	-0.1205	-0.0266	0.0155	0.08	0.0821	0.0404	0.1518	0.1481
1472	Lectin, mannose-binding 2 OS=Nannochloropsis gaditana (strain CCMP526) GN=NGATSA_3016100 PE=2 SV=1	I2CP59_NANGC	NGATSA_3016100	48 kDa	20	0.13	0.014	16.16	16.05	16.17	16.12	16.27	16.25	16.23	16.27	0.0422	-0.0763	0.0383	-0.0036	0.1481	0.1077	0.1007	0.1279
1473	Fmu domain-containing protein OS=Nannochloropsis gaditana GN=Naga_100316g2 PE=4 SV=1	W7T9S9_9STRA	Naga_100316g2	71 kDa	14	-0.13	0.014	16.46	16.49	16.6	16.48	16.38	16.5	16.33	16.34	-0.0482	-0.0286	0.0925	-0.0337	-0.1275	-0.0259	-0.1829	-0.1841
1474	Uncharacterized protein OS=Nannochloropsis gaditana (strain CCMP526) GN=NGA_0031802 PE=4 SV=1	K8YXA4_NANGC	NGA_0031802	56 kDa	13	-0.13	0.014	16.21	16.22	16.06	16.06	16.13	16.01	15.91	15.94	0.0922	0.0938	-0.0754	-0.0681	0.0066	-0.1236	-0.2277	-0.1815
1475	Uncharacterized protein OS=Nannochloropsis gaditana (strain CCMP526) GN=NGA_0174300 PE=4 SV=1	K8Z4V1_NANGC (+1)	NGA_0174300	25 kDa	11	-0.24	0.014	16.3	15.67	15.73	15.65	15.84	15.56	15.43	15.36	0.4855	-0.1239	-0.072	-0.1541	0.0376	-0.2407	-0.3752	-0.4467
1476	Cytochrome b6-f complex subunit 4 OS=Nannochloropsis gaditana GN=petD PE=3 SV=1	K9ZX30_9STRA	petD	18 kDa	11	-0.23	0.014	15.83	15.73	15.79	15.72	15.4	15.79	15.38	15.61	0.0622	-0.0348	0.0255	-0.0433	-0.363	0.0145	-0.4104	-0.1531
1477	Aldo keto reductase OS=Nannochloropsis gaditana GN=Naga_100137g16 PE=4 SV=1	W7TSW5_9STRA	Naga_100137g16	47 kDa	11	0.13	0.014	16.59	16.48	16.49	16.43	16.8	16.57	16.57	16.57	0.1036	-0.0136	-0.0116	-0.067	0.2982	0.0703	0.0646	0.0672
1478	Abc transporter b family protein OS=Nannochloropsis gaditana GN=abcB3 PE=4 SV=1	W7THX9_9STRA	abcB3	30 kDa	5	-0.3	0.014	14.86	14.9	14.89	15.04	14.79	14.59	14.57	14.41	-0.0777	-0.0225	-0.0362	0.1091	-0.114	-0.353	-0.3741	-0.4517
1479	Paired amphipathic helix protein sin3 OS=Nannochloropsis gaditana GN=Naga_102439g1 PE=4 SV=1	W7THT4_9STRA	Naga_102439g1	10 kDa	3	0.23	0.014	16.57	16.47	16.64	16.59	16.85	16.61	16.98	16.77	-0.01	-0.1007	0.071	0.0204	0.2719	0.0373	0.4067	0.1943
1480	Integral membrane mpv17 pmp22 (Fragment) OS=Nannochloropsis gaditana (strain CCMP526) GN=NGA_0505000 PE=3 SV=1	K8ZAS1_NANGC (+1)	NGA_0505000	25 kDa	3	0.32	0.014	15.91	16.03	16.17	15.78	16.29	16.32	16.54	16.2	-0.0984	0.035	0.1637	-0.2108	0.2744	0.3082	0.52	0.2054
1481	Uncharacterized protein OS=Nannochloropsis gaditana GN=Naga_100007g51 PE=4 SV=1	W7TQ21_9STRA	Naga_100007g51	26 kDa	2	0.73	0.014	12.97	12.18	12.39	12.56	13.69	13.34	13.45	12.74	0.4237	-0.4104	-0.1993	-0.0006	1.1921	0.788	0.9752	0.1769
1482	Uncharacterized protein OS=Nannochloropsis gaditana GN=Naga_100014g1 PE=4 SV=1	W7U0J3_9STRA	Naga_100014g1	25 kDa	3	0.41	0.014	15.37	15.53	15.54	15.87	15.83	15.87	16.16	16.36	-0.2881	-0.1133	-0.0621	0.2685	0.2231	0.323	0.6169	0.8223
1483	Proteasome subunit beta type OS=Nannochloropsis gaditana GN=Naga_100023g26 PE=3 SV=1	W7TGK8_9STRA	Naga_100023g26	30 kDa	25	0.09	0.015	16.07	16	15.93	15.97	16.15	15.98	16.18	15.99	0.0818	0.0097	-0.058	-0.0223	0.1556	-0.0055	0.1883	-0.003
1484	Uncharacterized protein OS=Nannochloropsis gaditana GN=Naga_100089g2 PE=4 SV=1	W7TE00_9STRA	Naga_100089g2	60 kDa	13	0.12	0.015	15.65	15.68	15.57	15.76	15.84	15.86	15.76	15.71	-0.0138	0.0128	-0.1025	0.0946	0.1758	0.1952	0.0923	0.0327
1485	TatA-like sec-independent protein translocator subunit OS=Nannochloropsis gaditana GN=Naga_100468g4 PE=4 SV=1	W7T3A7_9STRA	Naga_100468g4	22 kDa	8	-0.27	0.015	17.25	17.1	17.43	17.43	17.26	16.95	17.02	16.94	-0.0981	-0.2165	0.1183	0.1271	-0.0471	-0.3679	-0.2919	-0.3727
1486	Fam188a-like protein (Fragment) OS=Nannochloropsis gaditana (strain CCMP526) GN=NGATSA_3030000 PE=2 SV=1	I2CPJ8_NANGC	NGATSA_3030000	29 kDa	7	0.14	0.015	17.37	17.37	17.27	17.29	17.46	17.42	17.53	17.45	0.0413	0.0463	-0.058	-0.0338	0.1388	0.104	0.2162	0.1344
1487	Uncharacterized protein OS=Nannochloropsis gaditana (strain CCMP526) GN=NGA_0391901 PE=4 SV=1	K8YRS6_NANGC	NGA_0391901	12 kDa	6	0.24	0.015	16.98	16.7	16.67	16.59	17.17	17.03	17.02	16.62	0.2408	-0.0323	-0.0546	-0.1398	0.4321	0.3035	0.2819	-0.1081
1488	Dna-directed rna polymerases ii 24 kDa OS=Nannochloropsis gaditana GN=Naga_100024g50 PE=3 SV=1	W7U8C8_9STRA	Naga_100024g50	24 kDa	6	0.13	0.015	17.03	16.85	17.05	16.94	17.05	17.08	17.19	17.04	0.0557	-0.1095	0.0828	-0.0268	0.0844	0.1113	0.2215	0.0821
1489	Na p-type atpase (Fragment) OS=Nannochloropsis gaditana GN=Naga_100527g1 PE=4 SV=1	W7TWZ8_9STRA	Naga_100527g1	57 kDa	6	0.24	0.015	14.68	14.76	14.69	14.75	14.88	14.88	15.12	14.99	-0.0632	0.0293	-0.0454	0.0252	0.1492	0.1379	0.3946	0.2726
1490	Wd repeat-containing protein 70 OS=Nannochloropsis gaditana GN=Naga_100014g10 PE=4 SV=1	W7U0F2_9STRA	Naga_100014g10	77 kDa	5	0.27	0.015	15.99	16.01	16.47	16.15	16.5	16.33	16.59	16.34	-0.202	-0.106	0.3483	0.0008	0.3381	0.1869	0.4237	0.1807
1491	Uncharacterized protein OS=Nannochloropsis gaditana GN=Naga_100162g11 PE=4 SV=1	W7TQG5_9STRA	Naga_100162g11	23 kDa	3	0.32	0.015	13.3	13.17	13.46	13.48	13.77	13.43	13.8	13.6	-0.07	-0.2025	0.0921	0.1059	0.4082	0.0644	0.4318	0.2524
1492	30S ribosomal protein S14 OS=Nannochloropsis gaditana GN=rps14 PE=4 SV=1	A0A023PJS3_9STRA (+1)	rps14	11 kDa	2	0.44	0.015	16.2	16.45	16.49	16.42	16.84	16.77	16.82	16.88	-0.1959	0.0527	0.0904	0.0225	0.4461	0.3632	0.4234	0.4827
1493	Uncharacterized protein OS=Nannochloropsis gaditana GN=Naga_100926g1 PE=4 SV=1	W7TEK6_9STRA	Naga_100926g1	122 kDa	34	0.08	0.016	14.91	15.5	15.41	15.43	15.11	15.26	15.74	15.67	-0.4486	0.1478	0.0592	0.0831	-0.2486	-0.1004	0.4051	0.3226
1494	Fatty acid desaturase type 2 OS=Nannochloropsis gaditana GN=Naga_100013g52 PE=4 SV=1	W7UCJ8_9STRA	Naga_100013g52	38 kDa	32	0.09	0.016	17.72	17.78	17.67	17.6	17.76	17.85	17.81	17.75	0.0366	0.0875	-0.0197	-0.0917	0.0737	0.1639	0.1114	0.0548
1495	Nucleoporin 205-like protein OS=Nannochloropsis gaditana (strain CCMP526) GN=NGA_0450700 PE=4 SV=1	K8YXE5_NANGC (+1)	NGA_0450700	265 kDa	24	0.13	0.016	15.54	15.78	15.78	15.78	15.74	15.92	15.86	15.93	-0.1897	0.0547	0.0578	0.0435	0.008	0.1763	0.1207	0.1962
1496	AP-1 complex subunit beta-1 OS=Nannochloropsis gaditana (strain CCMP526) GN=AP1B1 PE=4 SV=1	K8YNR1_NANGC (+1)	AP1B1	102 kDa	21	0.22	0.016	15.36	15.34	15.31	15.32	15.61	15.48	15.59	15.48	0.0508	0.0194	-0.0259	-0.0053	0.2812	0.1399	0.2601	0.1615
1497	Endothelial monocyte-activating polypeptide ii pro-emap ii family protein OS=Nannochloropsis gaditana GN=Naga_100004g19 PE=4 SV=1	W7U6C4_9STRA	Naga_100004g19	39 kDa	21	0.11	0.016	16.61	16.55	16.48	16.33	16.61	16.65	16.59	16.55	0.1258	0.0451	-0.012	-0.1591	0.1158	0.1673	0.1031	0.064
1498	Kinetochore protein spc25 OS=Nannochloropsis gaditana GN=Naga_100002g132 PE=4 SV=1	W7TNF4_9STRA	Naga_100002g132	28 kDa	12	-0.19	0.016	15	14.75	14.89	14.73	14.71	14.6	14.54	14.7	0.1565	-0.0865	0.0612	-0.1042	-0.1264	-0.2291	-0.297	-0.1196
1499	Uncharacterized protein OS=Nannochloropsis gaditana GN=Naga_100013g3 PE=4 SV=1	W7TWP7_9STRA	Naga_100013g3	25 kDa	9	-0.33	0.016	14.35	14.32	14.43	14.14	14.04	13.98	13.99	13.91	0.0279	-0.0095	0.119	-0.1785	-0.2669	-0.3093	-0.3256	-0.4019
1500	Tho complex subunit 5 OS=Nannochloropsis gaditana GN=Naga_100026g21 PE=4 SV=1	W7UBK5_9STRA	Naga_100026g21	84 kDa	8	0.22	0.016	14.61	14.44	14.77	14.65	14.67	14.76	15.16	14.84	-0.0229	-0.1681	0.1599	0.0288	0.0447	0.1318	0.5455	0.2304
1501	Uncharacterized protein OS=Nannochloropsis gaditana (strain CCMP526) GN=NGA_0626100 PE=4 SV=1	K8Z1N6_NANGC	NGA_0626100	25 kDa	4	0.22	0.016	15.91	15.72	16.04	15.8	16.15	16.01	16.08	16.09	0.0679	-0.1392	0.1799	-0.0629	0.2867	0.1427	0.2187	0.2293
1502	Beta-lactamase domain protein OS=Nannochloropsis gaditana GN=Naga_100062g12 PE=4 SV=1	W7TVG4_9STRA	Naga_100062g12	52 kDa	3	0.33	0.016	14.69	15.07	15.12	15.19	15.25	15.35	15.23	15.55	-0.3332	0.0533	0.0962	0.1632	0.2296	0.3291	0.207	0.5325
1503	Uncharacterized protein OS=Nannochloropsis gaditana GN=Naga_100090g5 PE=4 SV=1	W7UB35_9STRA	Naga_100090g5	15 kDa	2	0.22	0.016	15.83	15.66	15.68	15.66	15.96	15.92	15.82	16	0.124	-0.0469	-0.0265	-0.0454	0.2495	0.2148	0.1074	0.2925
1504	Elongation factor 1-alpha OS=Nannochloropsis gaditana GN=Naga_100019g64 PE=3 SV=1	W7T3J7_9STRA	Naga_100019g64	49 kDa	100	0.13	0.017	15.11	14.99	15.08	15.08	15.2	15.15	15.3	15.05	0.053	-0.0684	0.0235	0.0081	0.1447	0.0915	0.2519	-0.0059
1505	Wos2 protein (Fragment) OS=Nannochloropsis gaditana (strain CCMP526) GN=NGA_0073700 PE=4 SV=1	K8YTT4_NANGC (+1)	NGA_0073700	15 kDa	15	0.16	0.017	15.93	15.82	15.75	15.73	16.07	15.99	15.95	15.81	0.12	0.0292	-0.0461	-0.0827	0.2728	0.1896	0.1449	0.0107
1506	Cytochrome b5 OS=Nannochloropsis gaditana GN=Naga_100004g31 PE=3 SV=1	W7TMB6_9STRA	Naga_100004g31	24 kDa	12	-0.13	0.017	17.7	17.48	17.42	17.45	17.48	17.25	17.46	17.25	0.1922	-0.0239	-0.0718	-0.0428	-0.0194	-0.2455	-0.0332	-0.2497
1507	Glutathione S-transferase OS=Nannochloropsis gaditana (strain CCMP526) GN=GST PE=4 SV=1	K8Z3Q5_NANGC (+1)	GST	18 kDa	8	-0.23	0.017	14.3	14.23	14.35	14.21	13.99	14.05	13.94	14.19	0.0444	-0.0509	0.0957	-0.0729	-0.2783	-0.1968	-0.3369	-0.0674
1508	T-snare family protein OS=Nannochloropsis gaditana GN=Naga_100013g77 PE=3 SV=1	W7TTK9_9STRA	Naga_100013g77	37 kDa	5	0.27	0.017	14.48	14.55	14.76	14.66	14.9	14.67	15.11	14.96	-0.1275	-0.0726	0.1354	0.0422	0.2883	0.0153	0.4937	0.3575
1509	Cluster of Atp-binding cassette sub-family b member mitochondrial OS=Nannochloropsis gaditana GN=Naga_100143g1 PE=4 SV=1 (W7T6U0_9STRA)	W7T6U0_9STRA [2]	Naga_100143g1	84 kDa	5	0.15	0.017	15.2	15.27	15.32	15.22	15.41	15.4	15.44	15.32	-0.0554	0.0107	0.0646	-0.0321	0.1647	0.158	0.1927	0.0689
1510	Peroxiredoxin-like protein OS=Nannochloropsis gaditana GN=SELU PE=4 SV=1	W7U196_9STRA	SELU	26 kDa	3	0.35	0.017	15.49	15.3	15.45	15.43	15.74	15.55	15.84	15.89	0.0684	-0.1221	0.0283	0.0074	0.3163	0.0985	0.4194	0.4666
1511	Ribosome maturation factor rimp OS=Nannochloropsis gaditana GN=Naga_100025g31 PE=4 SV=1	W7TJE5_9STRA	Naga_100025g31	53 kDa	3	0.2	0.017	14.81	14.81	14.94	14.96	15.19	15.05	15.1	15.05	-0.066	-0.1242	0.0451	0.0676	0.2902	0.1626	0.2053	0.1493
1512	Myb family transcription factor OS=Nannochloropsis gaditana GN=Naga_100180g7 PE=4 SV=1	W7TMI7_9STRA	Naga_100180g7	155 kDa	4	0.22	0.017	17.39	17.63	17.55	17.56	17.68	17.79	17.8	17.8	-0.1537	0.0873	0.0191	0.0298	0.1407	0.2519	0.257	0.2534
1513	Nicotinamide N-methyltransferase, putative OS=Nannochloropsis gaditana GN=Naga_100043g40 PE=4 SV=1	W7TI43_9STRA	Naga_100043g40	48 kDa	10	0.14	0.018	15.15	15.29	15.16	15.18	15.36	15.38	15.26	15.36	-0.0434	0.0987	-0.0362	-0.0161	0.1613	0.1889	0.0654	0.1593
1514	Ferrochelatase OS=Nannochloropsis gaditana (strain CCMP526) GN=FC (HEMH) PE=3 SV=1	K8Z5W1_NANGC (+1)	FC	49 kDa	6	0.16	0.018	15.44	15.7	15.68	15.59	15.8	15.75	15.71	15.84	-0.1729	0.0965	0.0797	-0.0173	0.183	0.144	0.0842	0.2224
1515	Uncharacterized protein OS=Nannochloropsis gaditana GN=Naga_100043g19 PE=4 SV=1	W7T9U9_9STRA	Naga_100043g19	198 kDa	5	0.2	0.018	15.63	15.95	16.15	15.94	16.02	16.19	16.04	16.26	-0.319	0.0416	0.2237	0.012	0.0899	0.2957	0.1098	0.3588
1516	Polyribonucleotide nucleotidyltransferase 1 OS=Nannochloropsis gaditana GN=Naga_100010g76 PE=4 SV=1	W7U3F1_9STRA	Naga_100010g76	110 kDa	6	0.31	0.018	13.67	13.62	13.84	13.89	13.97	13.85	14.17	14.21	-0.0936	-0.1523	0.0801	0.1278	0.2091	0.0684	0.4024	0.4458
1517	Uncharacterized protein OS=Nannochloropsis gaditana (strain CCMP526) GN=NGA_2119900 PE=4 SV=1	K8YMZ7_NANGC (+1)	NGA_2119900	17 kDa	5	0.29	0.018	16.22	15.91	15.75	15.97	16.33	16.15	16.39	16.2	0.2456	-0.0683	-0.233	-0.0099	0.3547	0.1432	0.4222	0.2348
1518	Protein phosphatase 2c OS=Nannochloropsis gaditana GN=Naga_100199g8 PE=4 SV=1	W7TRJ9_9STRA	Naga_100199g8	41 kDa	4	-0.36	0.018	14.66	14.96	14.78	14.94	14.5	14.49	14.41	14.56	-0.1938	0.114	-0.0687	0.0927	-0.3189	-0.3398	-0.4292	-0.2708
1519	ATP-dependent zinc metalloprotease FtsH OS=Nannochloropsis gaditana GN=ftsH PE=3 SV=1	K9ZWX3_9STRA	ftsH	77 kDa	114	-0.04	0.019	16.48	16.55	16.52	16.49	16.43	16.49	16.49	16.44	-0.0275	0.0303	0.0114	-0.0302	-0.0831	-0.0231	-0.0244	-0.0762
1520	Uncharacterized protein OS=Nannochloropsis gaditana GN=Naga_100042g31 PE=4 SV=1	W7U9D0_9STRA	Naga_100042g31	21 kDa	7	0.11	0.019	15.91	15.8	16.03	16	16.18	15.96	16.02	16.07	-0.021	-0.1364	0.0855	0.0621	0.2417	0.0225	0.0766	0.1349
1521	Transcription intermediary factor 1-alpha OS=Nannochloropsis gaditana GN=Naga_100075g16 PE=4 SV=1	W7TKR0_9STRA	Naga_100075g16	131 kDa	9	0.22	0.019	15.41	15.58	15.73	15.73	15.88	15.78	15.59	16	-0.235	-0.0381	0.1039	0.1171	0.2719	0.1556	-0.0565	0.3768
1522	Cluster of Violaxanthin de-epoxidase OS=Nannochloropsis gaditana (strain CCMP526) GN=NGA_0074200 PE=4 SV=1 (K8YTT8_NANGC)	K8YTT8_NANGC [2]	NGA_0074200	35 kDa	4	0.75	0.019	15.7	15.98	16.3	16.17	16.12	16.8	17.25	16.84	-0.305	0.0157	0.1255	0.0502	0.1682	0.5089	0.8735	0.7037
1523	Uncharacterized protein (Fragment) OS=Nannochloropsis gaditana GN=Naga_100460g3 PE=4 SV=1	W7TIC5_9STRA (+1)	Naga_100460g3	17 kDa	5	-0.24	0.019	16.54	16.1	16.29	16.19	16.3	15.89	15.86	16.01	0.2698	-0.1509	0.033	-0.0667	0.0373	-0.3646	-0.3932	-0.2367
1524	Propionyl-carboxylase OS=Nannochloropsis gaditana GN=Naga_100198g5 PE=4 SV=1	W7TSI3_9STRA	Naga_100198g5	63 kDa	4	0.19	0.019	13.77	13.95	14.04	14.07	13.97	14.27	14.08	14.33	-0.2062	-0.0133	0.0731	0.1056	0.0047	0.3078	0.1202	0.3657
1525	Prefoldin subunit 2 OS=Nannochloropsis gaditana GN=Naga_100003g131 PE=4 SV=1	W7TSZ4_9STRA	Naga_100003g131	16 kDa	4	0.2	0.019	15.73	15.67	15.46	15.63	15.94	15.79	15.91	15.68	0.1074	0.0388	-0.1654	0.0042	0.3032	0.1861	0.293	0.059
1526	Uncharacterized protein (Fragment) OS=Nannochloropsis gaditana (strain CCMP526) GN=NGA_0187100 PE=4 SV=1	K8Z624_NANGC	NGA_0187100	18 kDa	2	0.29	0.019	15.42	15.48	15.7	15.54	15.71	15.83	15.93	15.89	-0.1228	-0.0608	0.1522	-0.0063	0.1658	0.2879	0.3929	0.3524
1527	Photosystem II D2 protein OS=Nannochloropsis gaditana GN=psbD PE=3 SV=1	K9ZV27_9STRA	psbD	40 kDa	66	-0.2	0.02	16.3	16.21	16.24	16.22	16.05	16.11	16.08	15.94	0.0709	-0.0299	0.0082	-0.0156	-0.1833	-0.1564	-0.1478	-0.3064
1528	Uncharacterized protein OS=Nannochloropsis gaditana GN=Naga_100004g37 PE=4 SV=1	W7U6B0_9STRA	Naga_100004g37	76 kDa	42	-0.1	0.02	16.36	16.24	16.45	16.47	16.12	16.26	16.41	16.34	-0.0311	-0.1393	0.0537	0.0836	-0.2617	-0.1321	0.0267	-0.0498
1529	Alanine-2-oxoglutarate aminotransferase 2 OS=Nannochloropsis gaditana GN=OsNAAT1 PE=4 SV=1	W7TAZ1_9STRA	OsNAAT1	66 kDa	36	-0.09	0.02	15.89	16.05	16.02	15.96	15.83	15.87	15.94	15.93	-0.0897	0.066	0.0404	-0.0274	-0.1585	-0.1049	-0.0484	-0.0414
1530	Uncharacterized protein OS=Nannochloropsis gaditana GN=Naga_100012g41 PE=4 SV=1	W7T524_9STRA	Naga_100012g41	46 kDa	10	0.1	0.02	16.11	16.16	16.22	16.12	16.24	16.22	16.28	16.26	-0.0413	0.0065	0.0699	-0.0276	0.0906	0.0706	0.1264	0.1067
1531	Uncharacterized protein OS=Nannochloropsis gaditana GN=Naga_101064g1 PE=4 SV=1	W7TA03_9STRA	Naga_101064g1	16 kDa	4	0.18	0.02	15.68	16.02	15.7	15.92	16	16.07	15.99	16.05	-0.1709	0.1782	-0.139	0.0625	0.178	0.218	0.1362	0.2064
1532	Uncharacterized protein family UPF0136, Transmembrane OS=Nannochloropsis gaditana GN=Naga_100025g59 PE=4 SV=1	W7TZW6_9STRA	Naga_100025g59	12 kDa	4	0.14	0.02	14.26	14.15	14.31	14.27	14.41	14.41	14.52	14.22	-0.0016	-0.1044	0.0603	0.0223	0.1556	0.147	0.2692	-0.0234
1533	Uncharacterized protein OS=Nannochloropsis gaditana GN=Naga_100005g73 PE=4 SV=1	W7TY98_9STRA	Naga_100005g73	31 kDa	3	-0.33	0.02	15.18	14.98	14.98	15.05	14.66	14.56	14.79	14.77	0.1216	-0.054	-0.0523	0.0137	-0.396	-0.4458	-0.2673	-0.3104
1534	RAC serine/threonine-protein kinase OS=Nannochloropsis gaditana (strain CCMP526) GN=NGATSA_3002600 PE=2 SV=1	I2CPC4_NANGC	NGATSA_3002600	39 kDa	3	0.18	0.02	15.38	15.49	15.55	15.41	15.56	15.6	15.75	15.64	-0.0755	0.0348	0.0907	-0.0533	0.102	0.1378	0.2923	0.1843
1535	Uncharacterized protein OS=Nannochloropsis gaditana GN=Naga_100031g10 PE=4 SV=1	W7TJU9_9STRA	Naga_100031g10	35 kDa	2	-0.24	0.02	14.44	14.24	14.35	14.17	13.73	14.24	14.12	14.13	0.1408	-0.0522	0.0507	-0.133	-0.5703	-0.0577	-0.1794	-0.1663
1536	Histone h2b OS=Nannochloropsis gaditana GN=Naga_100005g46 PE=3 SV=1	W7TEP7_9STRA	Naga_100005g46	13 kDa	94	0.15	0.021	16.16	16.21	16.54	16.7	16.49	16.17	16.83	16.76	-0.2993	-0.2228	0.1078	0.3017	0.0588	-0.2549	0.4065	0.3476
1537	Ribose 5-phosphate isomerase A OS=Nannochloropsis gaditana (strain CCMP526) GN=RPIA PE=3 SV=1	K8Z9G7_NANGC	RPIA	30 kDa	46	-0.09	0.021	16.65	16.61	16.41	16.43	16.62	16.44	16.34	16.33	0.1307	0.0974	-0.1026	-0.0837	0.1075	-0.0757	-0.1853	-0.188
1538	Uncharacterized protein OS=Nannochloropsis gaditana GN=Naga_100075g3 PE=4 SV=1	W7T2R4_9STRA	Naga_100075g3	34 kDa	16	0.08	0.021	15.24	15.34	15.19	15.22	15.42	15.33	15.27	15.29	-0.0082	0.0928	-0.0585	-0.0205	0.1981	0.0928	0.0143	0.0542
1539	NADH dehydrogenase subunit 9 OS=Nannochloropsis gaditana GN=nd9 PE=3 SV=1	K9ZXV6_9STRA	nd9	23 kDa	15	0.15	0.021	16.11	16.46	16.4	16.36	16.42	16.47	16.56	16.5	-0.2269	0.1181	0.066	0.0197	0.0842	0.1386	0.2057	0.1617
1540	Telomeric repeat-binding factor OS=Nannochloropsis gaditana GN=Naga_100028g41 PE=4 SV=1	W7U934_9STRA	Naga_100028g41	72 kDa	5	0.29	0.021	14.24	14.2	14.36	14.34	14.61	14.46	14.58	14.63	-0.039	-0.0843	0.0379	0.0599	0.3251	0.1499	0.3004	0.3523
1541	Uncharacterized protein (Fragment) OS=Nannochloropsis gaditana (strain CCMP526) GN=NGATSA_3053900 PE=2 SV=1	I2CPC3_NANGC	NGATSA_3053900	40 kDa	4	0.18	0.021	15.35	15.52	15.43	15.53	15.5	15.56	15.82	15.7	-0.1146	0.0576	-0.0345	0.0726	0.0404	0.1036	0.3519	0.244
1542	Uncharacterized protein OS=Nannochloropsis gaditana (strain CCMP526) GN=NGATSA_3014500 PE=2 SV=1	I2CR15_NANGC	NGATSA_3014500	54 kDa	3	0.42	0.021	15.51	16.05	16.12	15.99	16.12	16.4	16.43	16.51	-0.418	0.0918	0.1907	0.0505	0.175	0.4402	0.4249	0.5653
1543	Chord family protein OS=Nannochloropsis gaditana GN=Naga_100038g26 PE=4 SV=1	W7U2Z9_9STRA	Naga_100038g26	37 kDa	2	-0.15	0.021	15.57	15.51	15.53	15.53	15.4	15.44	15.34	15.39	0.0321	-0.029	0	-0.0008	-0.1394	-0.0986	-0.199	-0.1446
1544	Aps kinase atp sulfurlyase pyrophosphatase fusion protein OS=Nannochloropsis gaditana GN=Naga_100004g164 PE=3 SV=1	W7TXI1_9STRA	Naga_100004g164	110 kDa	27	0.09	0.022	16.11	16.18	16.18	16.18	16.16	16.32	16.3	16.25	-0.0551	0.0218	0.0212	0.0253	0.0052	0.152	0.1293	0.0831
1545	Ribophorin ii family protein OS=Nannochloropsis gaditana GN=RPN2 PE=4 SV=1	W7TSW8_9STRA	RPN2	69 kDa	25	-0.1	0.022	16.52	16.47	16.52	16.48	16.39	16.46	16.49	16.22	0.016	-0.0214	0.0248	-0.0129	-0.1103	-0.0373	-0.0016	-0.267
1546	GTP-binding protein SAR1 OS=Nannochloropsis gaditana (strain CCMP526) GN=SAR1 PE=3 SV=1	K8YVP7_NANGC (+1)	SAR1	23 kDa	16	0.15	0.022	16.71	16.33	16.3	16.19	16.58	16.58	16.51	16.36	0.3333	-0.0391	-0.0663	-0.191	0.2096	0.2185	0.1516	-0.0042
1547	Glutathione peroxidase OS=Nannochloropsis gaditana GN=Naga_100024g56 PE=3 SV=1	W7U032_9STRA	Naga_100024g56	27 kDa	15	0.24	0.022	16.8	16.72	16.56	16.55	17.02	16.83	16.91	16.77	0.1481	0.0623	-0.0865	-0.1031	0.3584	0.1871	0.2572	0.09
1548	Ferredoxin OS=Nannochloropsis gaditana GN=Naga_100004g135 PE=4 SV=1	W7TM71_9STRA	Naga_100004g135	17 kDa	13	0.16	0.022	16.54	16.07	16.4	16.16	16.62	16.21	16.58	16.34	0.2778	-0.2088	0.1195	-0.1117	0.3446	-0.0721	0.3059	0.0704
1549	Aspartate kinase OS=Nannochloropsis gaditana GN=Naga_100004g167 PE=4 SV=1	W7U6D4_9STRA	Naga_100004g167	62 kDa	7	-0.09	0.022	15.65	15.34	15.4	15.44	15.42	15.19	15.47	15.32	0.2054	-0.107	-0.0527	-0.0149	-0.0384	-0.2585	0.0214	-0.1534
1550	Putative cleavage and polyadenylation specificity factor subunit 2 OS=Nannochloropsis gaditana GN=Naga_100032g44 PE=4 SV=1	W7THH3_9STRA	Naga_100032g44	107 kDa	6	0.12	0.022	16.64	16.86	16.88	16.93	16.98	16.86	17.02	16.99	-0.1906	0.0203	0.0422	0.0912	0.136	0.0262	0.1819	0.1492
1551	Uncharacterized protein OS=Nannochloropsis gaditana GN=Naga_100543g1 PE=4 SV=1	W7TF32_9STRA	Naga_100543g1	71 kDa	3	0.9	0.022	13.36	14.53	14.7	14.82	14.03	15.11	15.77	16.14	-1.2047	-0.0178	0.1506	0.2781	-0.5152	0.5576	1.2214	1.5983
1552	tRNA-splicing ligase RtcB homolog OS=Nannochloropsis gaditana GN=Naga_100207g4 PE=3 SV=1	W7TEQ9_9STRA	Naga_100207g4	55 kDa	3	0.16	0.022	16.34	16.54	16.58	16.6	16.66	16.69	16.75	16.61	-0.1785	0.0245	0.0643	0.0784	0.1379	0.165	0.2405	0.0936
1553	Putative microtubule-associated protein OS=Nannochloropsis gaditana GN=Naga_100102g13 PE=4 SV=1	W7TR62_9STRA	Naga_100102g13	52 kDa	2	0.24	0.022	15.63	15.47	15.82	15.81	16.07	15.76	15.99	15.86	-0.0519	-0.2148	0.1349	0.1254	0.3831	0.0778	0.3058	0.1709
1554	Glutamate-cysteine ligase (Fragment) OS=Nannochloropsis gaditana GN=Naga_101376g2 PE=4 SV=1	W7TLT0_9STRA	Naga_101376g2	18 kDa	2	-0.2	0.022	15.87	15.95	15.94	16.04	15.72	15.75	15.83	15.7	-0.0791	-0.0087	-0.0139	0.086	-0.2304	-0.1991	-0.1202	-0.2484
1555	Light-harvesting protein OS=Nannochloropsis gaditana (strain CCMP526) GN=NGA_0189801 PE=4 SV=1	K8YTS8_NANGC (+1)	NGA_0189801	26 kDa	53	-0.12	0.023	16	15.83	15.9	15.82	16.04	15.59	15.66	15.8	0.1244	-0.0431	0.0274	-0.0445	0.1542	-0.2886	-0.196	-0.0711
1556	Fkbp-type peptidyl-prolyl cis-trans isomerase OS=Nannochloropsis gaditana GN=Naga_100136g6 PE=4 SV=1	W7TQC7_9STRA	Naga_100136g6	41 kDa	10	0.12	0.023	16.83	16.84	16.85	16.74	16.96	16.94	16.9	16.95	0.0117	0.023	0.0372	-0.072	0.1459	0.1186	0.0784	0.1336
1557	Uncharacterized protein OS=Nannochloropsis gaditana GN=Naga_100007g98 PE=4 SV=1	W7U041_9STRA	Naga_100007g98	32 kDa	9	0.37	0.023	14.67	14.93	14.69	14.9	15.11	15.12	15.4	15.15	-0.1733	0.1053	-0.13	0.0817	0.2702	0.3166	0.5721	0.3352
1558	Uncharacterized protein (Fragment) OS=Nannochloropsis gaditana GN=Naga_102088g1 PE=4 SV=1	W7TVZ9_9STRA	Naga_102088g1	23 kDa	8	-0.2	0.023	16.48	16.38	16.67	16.66	16.27	16.47	16.32	16.34	-0.0848	-0.1621	0.1128	0.1087	-0.279	-0.1059	-0.234	-0.1927
1559	Prefoldin subunit OS=Nannochloropsis gaditana GN=Naga_100935g1 PE=4 SV=1	W7TK55_9STRA	Naga_100935g1	18 kDa	7	0.12	0.023	15.29	15.2	15.18	15.14	15.28	15.24	15.45	15.31	0.0824	0.0055	-0.0169	-0.0608	0.0851	0.046	0.2489	0.1124
1560	Transmembrane protein OS=Nannochloropsis gaditana GN=Naga_100030g13 PE=4 SV=1	W7TT11_9STRA	Naga_100030g13	43 kDa	4	0.2	0.023	15.31	15.55	15.36	15.43	15.59	15.54	15.63	15.72	-0.1338	0.129	-0.0597	0.0128	0.1702	0.1116	0.2398	0.349
1561	30s ribosomal protein s6 OS=Nannochloropsis gaditana GN=Naga_100005g59 PE=4 SV=1	W7TH23_9STRA	Naga_100005g59	29 kDa	4	-0.23	0.023	16.57	16.85	16.98	16.88	16.35	16.63	16.75	16.67	-0.2616	0.0287	0.1576	0.051	-0.4823	-0.2051	-0.0842	-0.1622
1562	Elongation of fatty acids protein OS=Nannochloropsis gaditana GN=ELO PE=3 SV=1	W7TSM8_9STRA	ELO	36 kDa	3	-0.32	0.023	16.65	16.16	15.9	15.93	15.97	15.77	15.82	15.66	0.5182	0.0246	-0.2356	-0.2006	-0.1591	-0.359	-0.3062	-0.4711
1563	Lariat debranching enzyme OS=Nannochloropsis gaditana GN=Naga_100026g44 PE=4 SV=1	W7TT55_9STRA	Naga_100026g44	60 kDa	3	0.14	0.023	15.43	15.43	15.49	15.37	15.47	15.69	15.53	15.59	-0.0014	-0.0054	0.0561	-0.0515	0.0393	0.261	0.1023	0.172
1564	Transport protein particle bet3 containing protein OS=Nannochloropsis gaditana GN=Naga_100186g7 PE=4 SV=1	W7TN98_9STRA	Naga_100186g7	21 kDa	3	0.43	0.023	14.52	14.66	14.75	14.98	14.88	15.09	15.29	15.21	-0.2158	-0.0677	0.0102	0.2535	0.1715	0.3237	0.5545	0.5265
1565	Abc transporter g family member 7 OS=Nannochloropsis gaditana GN=Naga_100291g1 PE=4 SV=1	W7T6T9_9STRA	Naga_100291g1	31 kDa	3	0.35	0.023	16.49	16.41	16.18	16.46	16.84	16.85	16.68	16.53	0.0948	0.0218	-0.2096	0.0684	0.4481	0.4594	0.2912	0.1477
1566	Uncharacterized protein (Fragment) OS=Nannochloropsis gaditana GN=Naga_100823g2 PE=4 SV=1	W7T4P5_9STRA	Naga_100823g2	57 kDa	2	-0.59	0.023	14.18	14.33	14.26	14.08	13.41	13.41	14.34	13.77	-0.011	0.1464	0.0623	-0.1222	-0.7904	-0.7897	0.0877	-0.4319
1567	Abc transporter g family member 29 OS=Nannochloropsis gaditana GN=Naga_100010g101 PE=4 SV=1	W7U3F5_9STRA	Naga_100010g101	182 kDa	9	0.15	0.024	16.45	16.69	16.82	16.73	16.8	16.87	16.77	16.9	-0.2542	0.0043	0.1281	0.0367	0.0983	0.1755	0.091	0.2027
1568	Auxin efflux carrier OS=Nannochloropsis gaditana GN=Naga_100182g10 PE=4 SV=1	W7U6Z5_9STRA	Naga_100182g10	71 kDa	4	-0.18	0.024	13.92	13.86	14.09	14.02	13.75	13.86	13.7	13.83	-0.0498	-0.1065	0.1183	0.0432	-0.2214	-0.1074	-0.2649	-0.1357
1569	Mg chelatase subunit OS=Nannochloropsis gaditana GN=Naga_102668g1 PE=4 SV=1	W7TCZ6_9STRA	Naga_102668g1	11 kDa	3	-0.48	0.024	13.68	13.88	13.93	13.79	13.31	13.69	13.05	13.5	-0.1429	0.0465	0.0836	-0.0591	-0.4924	-0.1726	-0.7508	-0.3515
1570	Signal peptide peptidase-aspartyl protease family OS=Nannochloropsis gaditana GN=Naga_100077g7 PE=4 SV=1	W7TAM5_9STRA	Naga_100077g7	78 kDa	3	0.25	0.024	14.97	15.41	15.46	15.28	15.31	15.77	15.43	15.64	-0.3203	0.1211	0.1616	-0.0054	0.0161	0.4804	0.1486	0.3575
1571	Dead deah box rna helicase OS=Nannochloropsis gaditana GN=Naga_100007g59 PE=4 SV=1	W7U850_9STRA	Naga_100007g59	70 kDa	3	0.13	0.024	15.42	15.49	15.65	15.61	15.68	15.73	15.7	15.58	-0.1249	-0.0541	0.1031	0.0647	0.133	0.1851	0.1526	0.0382
1572	Trna (Uracil-5-)-methyltransferase OS=Nannochloropsis gaditana GN=Naga_100031g21 PE=4 SV=1	W7U0B7_9STRA	Naga_100031g21	90 kDa	2	0.23	0.024	13.94	14.21	14.37	14.2	14.34	14.23	14.62	14.5	-0.2352	0.028	0.187	0.016	0.155	0.0479	0.4328	0.3129
1573	Adenosine kinase OS=Nannochloropsis gaditana (strain CCMP526) GN=ADK PE=4 SV=1	K8YSP3_NANGC	ADK	37 kDa	49	0.09	0.025	16.37	16.27	16.11	16.19	16.46	16.27	16.31	16.24	0.1544	0.041	-0.1172	-0.0416	0.2365	0.0335	0.085	0.008
1574	Cytochrome c6 OS=Nannochloropsis gaditana GN=petJ PE=3 SV=1	K9ZXM5_9STRA	petJ	13 kDa	44	0.12	0.025	16.21	16.2	16.09	16.12	16.37	16.19	16.26	16.23	0.0447	0.0519	-0.0751	-0.0352	0.2331	0.0364	0.1016	0.0797
1575	Fumarate hydratase OS=Nannochloropsis gaditana GN=Naga_100031g3 PE=3 SV=1	W7U120_9STRA	Naga_100031g3	58 kDa	18	0.06	0.025	16.4	16.52	16.3	16.29	16.4	16.45	16.47	16.45	0.0247	0.1342	-0.0827	-0.0905	0.0245	0.0783	0.0977	0.0706
1576	Glutaredoxin type i OS=Nannochloropsis gaditana (strain CCMP526) GN=NGA_0097001 PE=4 SV=1	K8YQQ5_NANGC (+1)	NGA_0097001	14 kDa	15	-0.11	0.025	17.02	16.88	16.8	16.82	16.91	16.87	16.67	16.53	0.1427	0.027	-0.0567	-0.0374	0.0361	0.0049	-0.1941	-0.3334
1577	Uncharacterized protein OS=Nannochloropsis gaditana GN=Naga_100041g18 PE=4 SV=1	W7T252_9STRA	Naga_100041g18	64 kDa	10	-0.13	0.025	14.82	14.93	14.74	14.93	14.69	14.66	14.82	14.73	-0.0368	0.0714	-0.1345	0.0622	-0.1812	-0.208	-0.0464	-0.1386
1578	Aspartate aminotransferase OS=Nannochloropsis gaditana GN=Naga_100041g30 PE=4 SV=1	W7TC40_9STRA	Naga_100041g30	54 kDa	9	-0.11	0.025	16.55	16.63	16.69	16.61	16.43	16.51	16.58	16.52	-0.068	0.0076	0.0695	-0.0111	-0.1851	-0.1227	-0.0446	-0.103
1579	ATPase ASNA1 homolog OS=Nannochloropsis gaditana GN=Naga_100107g13 PE=3 SV=1	W7U3J2_9STRA	Naga_100107g13	41 kDa	9	0.14	0.025	17.49	17.44	17.36	17.33	17.65	17.61	17.51	17.37	0.0939	0.0447	-0.0418	-0.0635	0.2633	0.2068	0.1108	-0.0233
1580	Immutans protein OS=Nannochloropsis gaditana GN=PTOX PE=4 SV=1	W7T7A6_9STRA	PTOX	43 kDa	7	0.1	0.025	15.3	15.47	15.45	15.44	15.42	15.54	15.5	15.6	-0.1135	0.047	0.0352	0.0222	0.0001	0.1266	0.0815	0.1882
1581	Uncharacterized protein OS=Nannochloropsis gaditana GN=Naga_100125g18 PE=4 SV=1	W7U406_9STRA	Naga_100125g18	23 kDa	7	-0.17	0.025	16.61	16.76	16.66	16.74	16.46	16.47	16.61	16.53	-0.0946	0.0677	-0.0441	0.048	-0.2423	-0.2163	-0.0781	-0.1677
1582	Uncharacterized protein OS=Nannochloropsis gaditana GN=Naga_100049g33 PE=4 SV=1	W7TWN7_9STRA	Naga_100049g33	41 kDa	6	0.17	0.025	15.52	15.81	15.73	15.83	15.89	15.8	15.89	16.01	-0.1969	0.0878	0.0089	0.1109	0.1647	0.0859	0.1655	0.2704
1583	Serine threonine protein OS=Nannochloropsis gaditana GN=Naga_100004g82 PE=4 SV=1	W7TXB3_9STRA	Naga_100004g82	96 kDa	6	0.38	0.025	15.24	15.51	15.62	15.75	15.48	15.71	16.26	16.21	-0.3244	-0.0793	0.0273	0.184	-0.0713	0.0923	0.6941	0.6471
1584	Signal recognition particle receptor OS=Nannochloropsis gaditana GN=SRP101 PE=4 SV=1	W7TX78_9STRA	SRP101	71 kDa	5	0.12	0.025	15.13	15.02	15.14	15.08	15.26	15.13	15.23	15.23	0.0341	-0.0717	0.0448	-0.01	0.1696	0.0379	0.1483	0.1352
1585	Uncharacterized protein OS=Nannochloropsis gaditana GN=Naga_100149g3 PE=4 SV=1	W7TNZ8_9STRA	Naga_100149g3	148 kDa	4	0.23	0.025	14.18	14.13	14.34	14.4	14.37	14.39	14.6	14.6	-0.1028	-0.1605	0.0688	0.0975	0.1023	0.1151	0.3309	0.3056
1586	Chaperone protein OS=Nannochloropsis gaditana GN=Naga_100029g14 PE=3 SV=1	W7TSZ5_9STRA	Naga_100029g14	58 kDa	3	0.33	0.025	14.84	14.94	14.91	15.08	14.83	15.33	15.36	15.47	-0.1055	-0.0114	-0.0371	0.1374	-0.1096	0.396	0.4331	0.5255
1587	Pheromone processing carboxypeptidase OS=Nannochloropsis gaditana GN=Naga_100008g60 PE=3 SV=1	W7U5F9_9STRA	Naga_100008g60	111 kDa	3	0.43	0.025	12.1	12.16	12.17	12.3	12.77	12.53	12.56	12.58	-0.0785	-0.0279	-0.0121	0.1057	0.574	0.3058	0.3663	0.369
1588	Cop9 signalosome complex subunit 4 OS=Nannochloropsis gaditana GN=Naga_102065g1 PE=4 SV=1	W7TG85_9STRA	Naga_102065g1	15 kDa	3	0.18	0.025	15.45	15.52	15.62	15.48	15.59	15.83	15.53	15.89	-0.0644	0.0056	0.1089	-0.0328	0.076	0.3307	0.0183	0.3752
1589	Ferredoxin (2fe-2s) OS=Nannochloropsis gaditana GN=Naga_100047g16 PE=4 SV=1	W7TUL4_9STRA	Naga_100047g16	25 kDa	3	0.19	0.025	15.85	16.12	16.18	16.2	16.24	16.18	16.39	16.45	-0.2599	0.0133	0.0658	0.0897	0.1336	0.0733	0.2809	0.3235
1590	Actin-related protein OS=Nannochloropsis gaditana GN=Naga_100070g8 PE=3 SV=1	W7TNC2_9STRA	Naga_100070g8	48 kDa	2	0.22	0.025	15.58	15.92	15.75	15.72	15.78	16.05	16.03	16.02	-0.1622	0.1772	0.01	-0.0237	0.0399	0.3092	0.2834	0.2786
1591	Ubiquitin-conjugating enzyme/RWD OS=Nannochloropsis gaditana GN=Naga_100004g80 PE=4 SV=1	W7TMA0_9STRA	Naga_100004g80	34 kDa	2	0.23	0.025	14.03	14.31	14.49	14.41	14.53	14.39	14.53	14.74	-0.2902	-0.0165	0.17	0.093	0.2107	0.0789	0.2167	0.4192
1592	Luminal binding protein OS=Nannochloropsis gaditana GN=HSP PE=3 SV=1	W7T7N9_9STRA	HSP	73 kDa	265	-0.07	0.026	15.59	15.58	15.59	15.65	15.64	15.53	15.51	15.51	-0.0112	-0.0281	-0.0142	0.0498	0.027	-0.0757	-0.0984	-0.0909
1593	Cluster of Long-chain acyl-CoA synthetase OS=Nannochloropsis gaditana (strain CCMP526) GN=NGATSA_3017000 PE=2 SV=1 (I2CP03_NANGC)	I2CP03_NANGC [2]	NGATSA_3017000	73 kDa	39	-0.12	0.026	16.07	15.94	15.99	15.92	15.88	15.93	15.78	15.8	0.0752	-0.0372	0.0145	-0.0539	-0.1121	-0.0588	-0.1972	-0.1882
1594	6,7-dimethyl-8-ribityllumazine synthase OS=Nannochloropsis gaditana GN=Naga_100004g9 PE=3 SV=1	W7TXK0_9STRA	Naga_100004g9	28 kDa	14	0.22	0.026	15.86	15.51	15.6	15.52	16.08	15.78	15.84	15.68	0.2522	-0.1101	0.0059	-0.0766	0.4796	0.1873	0.2295	0.0615
1595	Ap-1 complex subunit mu-1-like isoform 1 OS=Nannochloropsis gaditana GN=APM4 PE=3 SV=1	W7U403_9STRA	APM4	49 kDa	7	0.12	0.026	16.51	16.44	16.7	16.62	16.64	16.65	16.75	16.74	-0.0593	-0.1322	0.1325	0.0534	0.0745	0.0794	0.1819	0.1753
1596	SEL1 protein OS=Nannochloropsis gaditana (strain CCMP526) GN=SEL1 PE=4 SV=1	K8YQU1_NANGC (+1)	SEL1	101 kDa	5	0.24	0.026	15.97	16.06	16.08	15.94	16.07	16.19	16.42	16.3	-0.0542	0.0368	0.0438	-0.0892	0.0362	0.1699	0.4041	0.271
1597	Ubiquitin protein ligase e3 component n-recognin 2 OS=Nannochloropsis gaditana GN=Naga_100073g7 PE=4 SV=1	W7U0V5_9STRA	Naga_100073g7	288 kDa	4	0.29	0.026	15.13	15.24	15.64	15.41	15.6	15.64	15.54	15.78	-0.228	-0.0835	0.2686	0.0436	0.2412	0.2731	0.1807	0.4118
1598	Phage spo1 dna polymerase-related protein OS=Nannochloropsis gaditana GN=Naga_100011g21 PE=4 SV=1	W7TG57_9STRA	Naga_100011g21	33 kDa	3	0.3	0.026	15.25	14.99	15.14	15.08	15.26	15.48	15.42	15.46	0.1304	-0.13	0.0205	-0.0344	0.1848	0.3275	0.31	0.3645
1599	Cytochrome b6-f complex iron-sulfur subunit OS=Nannochloropsis gaditana GN=PETC PE=3 SV=1	W7TXJ0_9STRA	PETC	25 kDa	47	-0.06	0.027	16.41	16.21	16.1	16.25	16.31	16.1	16.14	16.12	0.1988	0.0014	-0.1152	0.0347	0.0937	-0.1189	-0.0785	-0.1153
1600	Zeaxanthin epoxidase OS=Nannochloropsis gaditana GN=Naga_100194g2 PE=4 SV=1	W7U2K1_9STRA	Naga_100194g2	56 kDa	37	-0.1	0.027	16.44	16.29	16.32	16.24	16.2	16.18	16.26	16.18	0.118	-0.0259	0.009	-0.0802	-0.1002	-0.1261	-0.0551	-0.1405
1601	Uncharacterized protein OS=Nannochloropsis gaditana GN=Naga_100063g10 PE=4 SV=1	W7TTX8_9STRA	Naga_100063g10	61 kDa	33	0.09	0.027	16.18	16.19	16.02	16.14	16.49	16.28	16.03	16.14	0.0591	0.0566	-0.1109	0.0082	0.3689	0.1487	-0.1042	0.0105
1602	Photosystem I reaction center subunit IV OS=Nannochloropsis gaditana GN=psaE PE=4 SV=1	K9ZVF7_9STRA	psaE	8 kDa	20	-0.28	0.027	15.89	15.84	15.69	15.88	15.6	15.55	15.54	15.45	0.0918	0.0167	-0.1252	0.0694	-0.2202	-0.2635	-0.2686	-0.3639
[truncated: 1,821 more rows]

## Sheet: Phosphorus vs Control
C496_TMT	Requires: min 2 peptides; 3%FDR at protein and peptide
[truncated: 3,425 more rows]
